# Supplementary material for: QTL mapping of cucumber fruit flesh thickness by SLAF-seq
Source: PubMed Central journal article supplement (PMC4623748; doi:10.1038/srep15829), 2015-10-28
Supplement: srep15829-s1.pdf [file srep15829-s1.pdf]

# QTL mapping of cucumber fruit flesh thickness by SLAF-seq

Xuwen Xu<sup>+</sup>, Lu Lu<sup>+</sup>, Biyun Zhu, Qiang Xu, Xiaohua Qi, Xuehao Chen\*

School of Horticulture and Plant Protection, Yangzhou University, Yangzhou, Jiangsu 225009, China

\*Corresponding author: xhchen@yzu.edu.cn

<sup>+</sup>these authors contributed equally to this work

Supplementary Figure 1 Construction of SSR linkage groups and chromosomal QTL mapping for fruit flesh thickness. Marker names and distances are shown to the right and left of each linkage group, respectively. QTL is presented as red box in the linkage group. Linkage map was constructed by Joinmap4.0 software, QTL was calculated by WinQTLCart2.5.

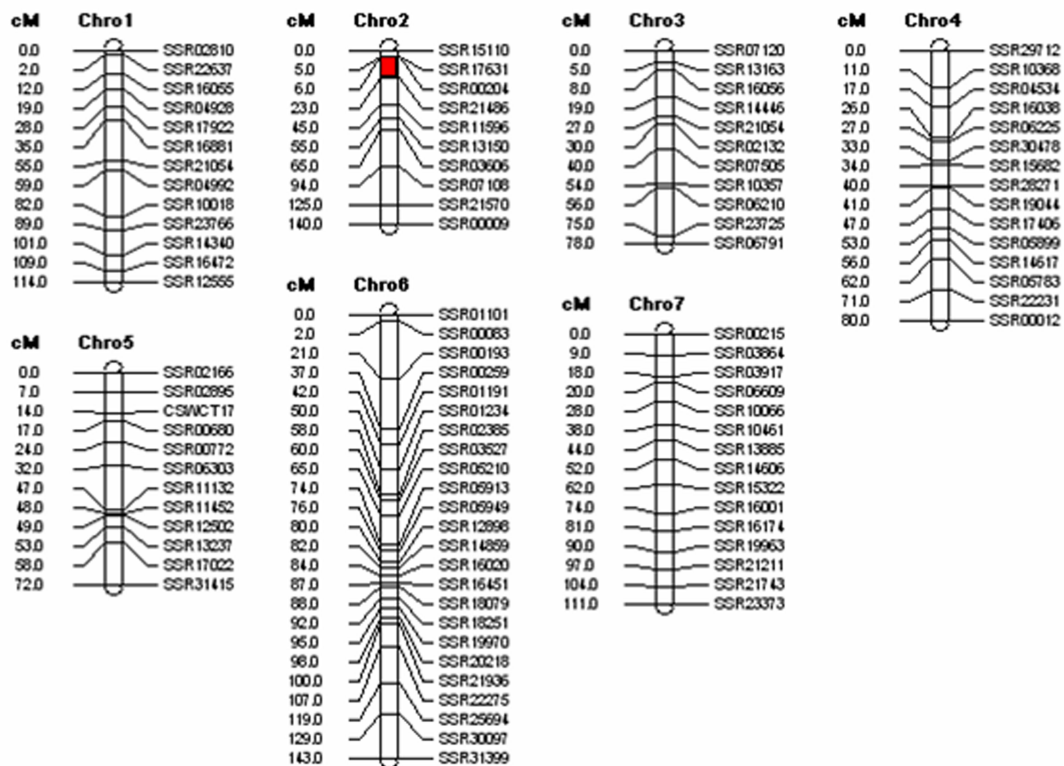

Supplementary Figure 2 Alignment of DNA sequences of the *Csa2M058670.1* from four thick fruit flesh lines (D8, SPD010, DPD010 and SPD110) and four thin fruit flesh cucumber lines (XUE1, Pepino, Jin5-508 and EP6392). The two types of mutations are shaded in yellow and red. Multiple sequence alignment was done by DNAMAN software.

```

D8.txt          ATGGCGACTG ACAATCAGGT TAAAAATAAA ACCATTCTAC TGCTCCAAAT
SPD010.txt     ATGGCGACTG ACAATCAGGT TAAAAATAAA ACCATTCTAC TGCTCCAAAT
DPD010.txt     ATGGCGACTG ACAATCAGGT TAAAAATAAA ACCATTCTAC TGCTCCAAAT
SPD110.txt     ATGGCGACTG ACAATCAGGT TAAAAATAAA ACCATTCTAC TGCTCCAAAT
XUE1.txt       ATGGCGACTG ACAATCAGGT TAAAAATAAA ACCATTCTAC TGCTCCAAAT
Pepino.txt     ATGGCGACTG ACAATCAGGT TAAAAATAAA ACCATTCTAC TGCTCCAAAT
Jin5-508.txt  ATGGCGACTG ACAATCAGGT TAAAAATAAA ACCATTCTAC TGCTCCAAAT
EP6392.txt     ATGGCGACTG ACAATCAGGT TAAAAATAAA ACCATTCTAC TGCTCCAAAT

```

```

D8.txt          TTCTCCATTT CATTCTCTTT TCTTGCTATT TACTTTTACA CTTCAC TTCC
SPD010.txt     TTCTCCATTT CATTCTCTTT TCTTGCTATT TACTTTTACA CTTCAC TTCC
DPD010.txt     TTCTCCATTT CATTCTCTTT TCTTGCTATT TACTTTTACA CTTCAC TTCC
SPD110.txt     TTCTCCATTT CATTCTCTTT TCTTGCTATT TACTTTTACA CTTCAC TTCC
XUE1.txt       TTCTCCATTT CATTCTCTTT TCTTGCTATT TACTTTTACA CTTCAC TTCC
Pepino.txt     TTCTCCATTT CATTCTCTTT TCTTGCTATT TACTTTTACA CTTCAC TTCC
Jin5-508.txt  TTCTCCATTT CATTCTCTTT TCTTGCTATT TACTTTTACA CTTCAC TTCC
EP6392.txt     TTCTCCATTT CATTCTCTTT TCTTGCTATT TACTTTTACA CTTCAC TTCC

```

```

D8.txt          TTCATGCTCA TCGGGGGAAC TCTGTCGCTG CTGATCTTTC TTTCTTATTC
SPD010.txt     TTCATGCTCA TCGGGGGAAC TCTGTCGCTG CTGATCTTTC TTTCTTATTC
DPD010.txt     TTCATGCTCA TCGGGGGAAC TCTGTCGCTG CTGATCTTTC TTTCTTATTC
SPD110.txt     TTCATGCTCA TCGGGGGAAC TCTGTCGCTG CTGATCTTTC TTTCTTATTC
XUE1.txt       TTCATGCTCA TCGGGGGAAC TCTGTCGCTG CTGATCTTTC TTTCTTATTC
Pepino.txt     TTCATGCTCA TCGGGGGAAC TCTGTCGCTG CTGATCTTTC TTTCTTATTC
Jin5-508.txt  TTCATGCTCA TCGGGGGAAC TCTGTCGCTG CTGATCTTTC TTTCTTATTC
EP6392.txt     TTCATGCTCA TCGGGGGAAC TCTGTCGCTG CTGATCTTTC TTTCTTATTC

```

```

D8.txt          CCTTTCTTTT TACAATGTTT TCATTTCAAC TGTACAGGAG AAAC TGTTTC
SPD010.txt     CCTTTCTTTT TACAATGTTT TCATTTCAAC TGTACAGGAG AAAC TGTTTC
DPD010.txt     CCTTTCTTTT TACAATGTTT TCATTTCAAC TGTACAGGAG AAAC TGTTTC
SPD110.txt     CCTTTCTTTT TACAATGTTT TCATTTCAAC TGTACAGGAG AAAC TGTTTC

```

XUE1.txt CCTTTCTTTT TACAATGTTT TCATTTCAAC TGTACAGGAG AAAC TGTTC  
Pepino.txt CCTTTCTTTT TACAATGTTT TCATTTCAAC TGTACAGGAG AAAC TGTTC  
Jin5-508.txt CCTTTCTTTT TACAATGTTT TCATTTCAAC TGTACAGGAG AAAC TGTTC  
EP6392.txt CCTTTCTTTT TACAATGTTT TCATTTCAAC TGTACAGGAG AAAC TGTTC

D8.txt TCAACCTTAC TTCACTTCTT GTCCTCTCT GTTCTTGTTT GTTTGGATTC  
SPD010.txt TCAACCTTAC TTCACTTCTT GTCCTCTCT GTTCTTGTTT GTTTGGATTC  
DPD010.txt TCAACCTTAC TTCACTTCTT GTCCTCTCT GTTCTTGTTT GTTTGGATTC  
SPD110.txt TCAACCTTAC TTCACTTCTT GTCCTCTCT GTTCTTGTTT GTTTGGATTC  
XUE1.txt TCAACCTTAC TTCACTTCTT GTCCTCTCT GTTCTTGTTT GTTTGGATTC  
Pepino.txt TCAACCTTAC TTCACTTCTT GTCCTCTCT GTTCTTGTTT GTTTGGATTC  
Jin5-508.txt TCAACCTTAC TTCACTTCTT GTCCTCTCT GTTCTTGTTT GTTTGGATTC  
EP6392.txt TCAACCTTAC TTCACTTCTT GTCCTCTCT GTTCTTGTTT GTTTGGATTC

D8.txt TTGGGCGATT TCTTCTGTTA TAGTTACTTC TTTTATTGGT GGGGTTTTGA  
SPD010.txt TTGGGCGATT TCTTCTGTTA TAGTTACTTC TTTTATTGGT GGGGTTTTGA  
DPD010.txt TTGGGCGATT TCTTCTGTTA TAGTTACTTC TTTTATTGGT GGGGTTTTGA  
SPD110.txt TTGGGCGATT TCTTCTGTTA TAGTTACTTC TTTTATTGGT GGGGTTTTGA  
XUE1.txt TTGGGCGATT TCTTCTGTTA TAGTTACTTC TTTTATTGGT GGGGTTTTGA  
Pepino.txt TTGGGCGATT TCTTCTGTTA TAGTTACTTC TTTTATTGGT GGGGTTTTGA  
Jin5-508.txt TTGGGCGATT TCTTCTGTTA TAGTTACTTC TTTTATTGGT GGGGTTTTGA  
EP6392.txt TTGGGCGATT TCTTCTGTTA TAGTTACTTC TTTTATTGGT GGGGTTTTGA

D8.txt TAGCTTGTTA TG TAGTGCGC GAACGATGGG TTCTTGGGGC ATCTTGAAAA  
SPD010.txt TAGCTTGTTA TG TAGTGCGC GAACGATGGG TTCTTGGGGC ATCTTGAAAA  
DPD010.txt TAGCTTGTTA TG TAGTGCGC GAACGATGGG TTCTTGGGGC ATCTTGAAAA  
SPD110.txt TAGCTTGTTA TG TAGTGCGC GAACGATGGG TTCTTGGGGC ATCTTGAAAA  
XUE1.txt TAGCTTGTTA TG TAGTGCGC GAACGATGGG TTCTTGGGGC ATCTTGAAAA  
Pepino.txt TAGCTTGTTA TG TAGTGCGC GAACGATGGG TTCTTGGGGC ATCTTGAAAA  
Jin5-508.txt TAGCTTGTTA TG TAGTGCGC GAACGATGGG TTCTTGGGGC ATCTTGAAAA  
EP6392.txt TAGCTTGTTA TG TAGTGCGC GAACGATGGG TTCTTGGGGC ATCTTGAAAA

D8.txt TGAAAATTC TCTTGGTTGG CTAAATGGGT TCGTCTTGAT TTCAGTTCAT  
SPD010.txt TGAAAATTC TCTTGGTTGG CTAAATGGGT TCGTCTTGAT TTCAGTTCAT  
DPD010.txt TGAAAATTC TCTTGGTTGG CTAAATGGGT TCGTCTTGAT TTCAGTTCAT  
SPD110.txt TGAAAATTC TCTTGGTTGG CTAAATGGGT TCGTCTTGAT TTCAGTTCAT  
XUE1.txt TGAAAATTC TCTTGGTTGG CTAAATGGGT TCGTCTTGAT TTCAGTTCAT  
Pepino.txt TGAAAATTC TCTTGGTTGG CTAAATGGGT TCGTCTTGAT TTCAGTTCAT  
Jin5-508.txt TGAAAATTC TCTTGGTTGG CTAAATGGGT TCGTCTTGAT TTCAGTTCAT  
EP6392.txt TGAAAATTC TCTTGGTTGG CTAAATGGGT TCGTCTTGAT TTCAGTTCAT

D8.txt TGCAGTATTT TTGTCCCTTA CCTTTGCTTC TTTTTTTTATT GTCGTTTCTT  
SPD010.txt TGCAGTATTT TTGTCCCTTA CCTTTGCTTC TTTTTTTTATT GTCGTTTCTT  
DPD010.txt TGCAGTATTT TTGTCCCTTA CCTTTGCTTC TTTTTTTTATT GTCGTTTCTT  
SPD110.txt TGCAGTATTT TTGTCCCTTA CCTTTGCTTC TTTTTTTTATT GTCGTTTCTT  
XUE1.txt TGCAGTATTT TTGTCCCTTA CCTTTGCTTC TTTTTTTTATT GTCGTTTCTT  
Pepino.txt TGCAGTATTT TTGTCCCTTA CCTTTGCTTC TTTTTTTTATT GTCGTTTCTT  
Jin5-508.txt TGCAGTATTT TTGTCCCTTA CCTTTGCTTC TTTTTTTTATT GTCGTTTCTT  
EP6392.txt TGCAGTATTT TTGTCCCTTA CCTTTGCTTC TTTTTTTTATT GTCGTTTCTT

D8.txt ATTTCCGGAGT TCAAGAAGGG ATTGGATGTT AAATTGTTAT GGGTTGGTTT  
SPD010.txt ATTTCCGGAGT TCAAGAAGGG ATTGGATGTT AAATTGTTAT GGGTTGGTTT  
DPD010.txt ATTTCCGGAGT TCAAGAAGGG ATTGGATGTT AAATTGTTAT GGGTTGGTTT  
SPD110.txt ATTTCCGGAGT TCAAGAAGGG ATTGGATGTT AAATTGTTAT GGGTTGGTTT  
XUE1.txt ATTTCCGGAGT TCAAGAAGGG ATTGGATGTT AAATTGTTAT GGGTTGGTTT  
Pepino.txt ATTTCCGGAGT TCAAGAAGGG ATTGGATGTT AAATTGTTAT GGGTTGGTTT  
Jin5-508.txt ATTTCCGGAGT TCAAGAAGGG ATTGGATGTT AAATTGTTAT GGGTTGGTTT  
EP6392.txt ATTTCCGGAGT TCAAGAAGGG ATTGGATGTT AAATTGTTAT GGGTTGGTTT

D8.txt CTTGGCCATT TTTTTTAATG TTTTTTTTAC CAAAGAATTG GAGTGGTAAA  
SPD010.txt CTTGGCCATT TTTTTTAATG TTTTTTTTAC CAAAGAATTG GAGTGGTAAA  
DPD010.txt CTTGGCCATT TTTTTTAATG TTTTTTTTAC CAAAGAATTG GAGTGGTAAA  
SPD110.txt CTTGGCCATT TTTTTTAATG TTTTTTTTAC CAAAGAATTG GAGTGGTAAA  
XUE1.txt CTTGGCCATT TTTTTTAATG TTTTTTTTAC CAAAGAATTG GAGTGGTAAA  
Pepino.txt CTTGGCCATT TTTTTTAATG TTTTTTTTAC CAAAGAATTG GAGTGGTAAA  
Jin5-508.txt CTTGGCCATT TTTTTTAATG TTTTTTTTAC CAAAGAATTG GAGTGGTAAA  
EP6392.txt CTTGGCCATT TTTTTTAATG TTTTTTTTAC CAAAGAATTG GAGTGGTAAA

D8.txt ACCTTGCAAA GTCATGGAAC TCTATTCACA TGTTTCTATG ATTCTATAAA  
SPD010.txt ACCTTGCAAA GTCATGGAAC TCTATTCACA TGTTTCTATG ATTCTATAAA  
DPD010.txt ACCTTGCAAA GTCATGGAAC TCTATTCACA TGTTTCTATG ATTCTATAAA  
SPD110.txt ACCTTGCAAA GTCATGGAAC TCTATTCACA TGTTTCTATG ATTCTATAAA  
XUE1.txt ACCTTGCAAA GTCATGGAAC TCTATTCACA TGTTTCTATG ATTCTATAAA  
Pepino.txt ACCTTGCAAA GTCATGGAAC TCTATTCACA TGTTTCTATG ATTCTATAAA  
Jin5-508.txt ACCTTGCAAA GTCATGGAAC TCTATTCACA TGTTTCTATG ATTCTATAAA  
EP6392.txt ACCTTGCAAA GTCATGGAAC TCTATTCACA TGTTTCTATG ATTCTATAAA

D8.txt TTAATCAGTT CAATATGTGA GCTTAGTCAA GCAGTTGATG TATTTCTATT  
SPD010.txt TTAATCAGTT CAATATGTGA GCTTAGTCAA GCAGTTGATG TATTTCTATT

DPD010.txt TTAATCAGTT CAATATGTGA GCTTAGTCAA GCAGTTGATG TATTTCTATT  
SPD110.txt TTAATCAGTT CAATATGTGA GCTTAGTCAA GCAGTTGATG TATTTCTATT  
XUE1.txt TTAATCAGTT CAATATGTGA GCTTAGTCAA GCAGTTGATG TATTTCTATT  
Pepino.txt TTAATCAGTT CAATATGTGA GCTTAGTCAA GCAGTTGATG TATTTCTATT  
Jin5-508.txt TTAATCAGTT CAATATGTGA GCTTAGTCAA GCAGTTGATG TATTTCTATT  
EP6392.txt TTAATCAGTT CAATATGTGA GCTTAGTCAA GCAGTTGATG TATTTCTATT

D8.txt CTAAAGAAAA ACTGATTAGT TATAAACTGT TTGTTGCATT TGCTTGTGTG  
SPD010.txt CTAAAGAAAA ACTGATTAGT TATAAACTGT TTGTTGCATT TGCTTGTGTG  
DPD010.txt CTAAAGAAAA ACTGATTAGT TATAAACTGT TTGTTGCATT TGCTTGTGTG  
SPD110.txt CTAAAGAAAA ACTGATTAGT TATAAACTGT TTGTTGCATT TGCTTGTGTG  
XUE1.txt CTAAAGAAAA ACTGATTAGT TATAAACTGT TTGTTGCATT TGCTTGTGTG  
Pepino.txt CTAAAGAAAA ACTGATTAGT TATAAACTGT TTGTTGCATT TGCTTGTGTG  
Jin5-508.txt CTAAAGAAAA ACTGATTAGT TATAAACTGT TTGTTGCATT TGCTTGTGTG  
EP6392.txt CTAAAGAAAA ACTGATTAGT TATAAACTGT TTGTTGCATT TGCTTGTGTG

D8.txt TTGCAGCCTT CCTCATCTGA TGAAGTGAGG GATGATGACG GTCGCTTTCT  
SPD010.txt TTGCAGCCTT CCTCATCTGA TGAAGTGAGG GATGATGACG GTCGCTTTCT  
DPD010.txt TTGCAGCCTT CCTCATCTGA TGAAGTGAGG GATGATGACG GTCGCTTTCT  
SPD110.txt TTGCAGCCTT CCTCATCTGA TGAAGTGAGG GATGATGACG GTCGCTTTCT  
XUE1.txt TTGCAGCCTT CCTCATCTGA TGAAGTGAGG GATGATGACG GTCGCTTTCT  
Pepino.txt TTGCAGCCTT CCTCATCTGA TGAAGTGAGG GATGATGACG GTCGCTTTCT  
Jin5-508.txt TTGCAGCCTT CCTCATCTGA TGAAGTGAGG GATGATGACG GTCGCTTTCT  
EP6392.txt TTGCAGCCTT CCTCATCTGA TGAAGTGAGG GATGATGACG GTCGCTTTCT

D8.txt ATTTCTTGCA TTGGATCGAA ATGACCGTCT TTTCGACAAA AAGAAGGTGA  
SPD010.txt ATTTCTTGCA TTGGATCGAA ATGACCGTCT TTTCGACAAA AAGAAGGTGA  
DPD010.txt ATTTCTTGCA TTGGATCGAA ATGACCGTCT TTTCGACAAA AAGAAGGTGA  
SPD110.txt ATTTCTTGCA TTGGATCGAA ATGACCGTCT TTTCGACAAA AAGAAGGTGA  
XUE1.txt ATTTCTTGCA TTGGATCGAA ATGACCGTCT TTTCGACAAA AAGAAGGTGA  
Pepino.txt ATTTCTTGCA TTGGATCGAA ATGACCGTCT TTTCGACAAA AAGAAGGTGA  
Jin5-508.txt ATTTCTTGCA TTGGATCGAA ATGACCGTCT TTTCGACAAA AAGAAGGTGA  
EP6392.txt ATTTCTTGCA TTGGATCGAA ATGACCGTCT TTTCGACAAA AAGAAGGTGA

D8.txt AATATGAATT GCCAGATTTT TTTTGTATAC ACTGCTATCT TGGTCAGGAG  
SPD010.txt AATATGAATT GCCAGATTTT TTTTGTATAC ACTGCTATCT TGGTCAGGAG  
DPD010.txt AATATGAATT GCCAGATTTT TTTTGTATAC ACTGCTATCT TGGTCAGGAG  
SPD110.txt AATATGAATT GCCAGATTTT TTTTGTATAC ACTGCTATCT TGGTCAGGAG  
XUE1.txt AATATGAATT GCCAGATTTT TTTTGTATAC ACTGCTATCT TGGTCAGGAG  
Pepino.txt AATATGAATT GCCAGATTTT TTTTGTATAC ACTGCTATCT TGGTCAGGAG

Jin5-508.txt AATATGAATT GCCAGATTTT TTTTGTATAC ACTGCTATCT TGGTCAGGAG  
EP6392.txt AATATGAATT GCCAGATTTT TTTTGTATAC ACTGCTATCT TGGTCAGGAG

D8.txt AGTGCAGAAA GTGAGGGGAA ATTACAAGCA AAATCTGGAT GAACAAGGAG  
SPD010.txt AGTGCAGAAA GTGAGGGGAA ATTACAAGCA AAATCTGGAT GAACAAGGAG  
DPD010.txt AGTGCAGAAA GTGAGGGGAA ATTACAAGCA AAATCTGGAT GAACAAGGAG  
SPD110.txt AGTGCAGAAA GTGAGGGGAA ATTACAAGCA AAATCTGGAT GAACAAGGAG  
XUE1.txt AGTGCAGAAA GTGAGGGGAA ATTACAAGCA AAATCTGGAT GAACAAGGAG  
Pepino.txt AGTGCAGAAA GTGAGGGGAA ATTACAAGCA AAATCTGGAT GAACAAGGAG  
Jin5-508.txt AGTGCAGAAA GTGAGGGGAA ATTACAAGCA AAATCTGGAT GAACAAGGAG  
EP6392.txt AGTGCAGAAA GTGAGGGGAA ATTACAAGCA AAATCTGGAT GAACAAGGAG

D8.txt TTCACAATTA GGAAGTTAAT ACCTTTATTG ACAAAAAATT TTAGTTCATC  
SPD010.txt TTCACAATTA GGAAGTTAAT ACCTTTATTG ACAAAAAATT TTAGTTCATC  
DPD010.txt TTCACAATTA GGAAGTTAAT ACCTTTATTG ACAAAAAATT TTAGTTCATC  
SPD110.txt TTCACAATTA GGAAGTTAAT ACCTTTATTG ACAAAAAATT TTAGTTCATC  
XUE1.txt TTCACAATTA GGAAGTTAAT ACCTTTATTG ACAAAAAATT TTAGTTCATC  
Pepino.txt TTCACAATTA GGAAGTTAAT ACCTTTATTG ACAAAAAATT TTAGTTCATC  
Jin5-508.txt TTCACAATTA GGAAGTTAAT ACCTTTATTG ACAAAAAATT TTAGTTCATC  
EP6392.txt TTCACAATTA GGAAGTTAAT ACCTTTATTG ACAAAAAATT TTAGTTCATC

D8.txt TTTTTTCTGC ATTCATTGAC TTTCTAACTT TTTTATTGAT ACTTAATGAT  
SPD010.txt TTTTTTCTGC ATTCATTGAC TTTCTAACTT TTTTATTGAT ACTTAATGAT  
DPD010.txt TTTTTTCTGC ATTCATTGAC TTTCTAACTT TTTTATTGAT ACTTAATGAT  
SPD110.txt TTTTTTCTGC ATTCATTGAC TTTCTAACTT TTTTATTGAT ACTTAATGAT  
XUE1.txt TTTTTTCTGC ATTCATTGAC TTTCTAACTT TTTTATTGAT ACTTAATGAT  
Pepino.txt TTTTTTCTGC ATTCATTGAC TTTCTAACTT TTTTATTGAT ACTTAATGAT  
Jin5-508.txt TTTTTTCTGC ATTCATTGAC TTTCTAACTT TTTTATTGAT ACTTAATGAT  
EP6392.txt TTTTTTCTGC ATTCATTGAC TTTCTAACTT TTTTATTGAT ACTTAATGAT

D8.txt AAGATTGACA CATTGATGTG AATAATGAAG ATGATTAGAT CTATGCTCTA  
SPD010.txt AAGATTGACA CATTGATGTG AATAATGAAG ATGATTAGAT CTATGCTCTA  
DPD010.txt AAGATTGACA CATTGATGTG AATAATGAAG ATGATTAGAT CTATGCTCTA  
SPD110.txt AAGATTGACA CATTGATGTG AATAATGAAG ATGATTAGAT CTATGCTCTA  
XUE1.txt AAGATTGACA CATTGATGTG AATAATGAAG ATGATTAGAT CTATGCTCTA  
Pepino.txt AAGATTGACA CATTGATGTG AATAATGAAG ATGATTAGAT CTATGCTCTA  
Jin5-508.txt AAGATTGACA CATTGATGTG AATAATGAAG ATGATTAGAT CTATGCTCTA  
EP6392.txt AAGATTGACA CATTGATGTG AATAATGAAG ATGATTAGAT CTATGCTCTA

D8.txt AAGTTAAGCA ATAACAAAGA AGAAACTAGA AACATGTGGT TTTAATGAAA  
SPD010.txt AAGTTAAGCA ATAACAAAGA AGAAACTAGA AACATGTGGT TTTAATGAAA  
DPD010.txt AAGTTAAGCA ATAACAAAGA AGAAACTAGA AACATGTGGT TTTAATGAAA  
SPD110.txt AAGTTAAGCA ATAACAAAGA AGAAACTAGA AACATGTGGT TTTAATGAAA  
XUE1.txt AAGTTAAGCA ATAACAAAGA AGAAACTAGA AACATGTGGT TTTAATGAAA  
Pepino.txt AAGTTAAGCA ATAACAAAGA AGAAACTAGA AACATGTGGT TTTAATGAAA  
Jin5-508.txt AAGTTAAGCA ATAACAAAGA AGAAACTAGA AACATGTGGT TTTAATGAAA  
EP6392.txt AAGTTAAGCA ATAACAAAGA AGAAACTAGA AACATGTGGT TTTAATGAAA

D8.txt AACCCCTTGCT AGTTGCAGTA TTAATATTAT TGTTTAGAAA AAAGCTAGGA  
SPD010.txt AACCCCTTGCT AGTTGCAGTA TTAATATTAT TGTTTAGAAA AAAGCTAGGA  
DPD010.txt AACCCCTTGCT AGTTGCAGTA TTAATATTAT TGTTTAGAAA AAAGCTAGGA  
SPD110.txt AACCCCTTGCT AGTTGCAGTA TTAATATTAT TGTTTAGAAA AAAGCTAGGA  
XUE1.txt AACCCCTTGCT AGTTGCAGTA TTAATATTAT TGTTTAGAAA AAAGCTAGGA  
Pepino.txt AACCCCTTGCT AGTTGCAGTA TTAATATTAT TGTTTAGAAA AAAGCTAGGA  
Jin5-508.txt AACCCCTTGCT AGTTGCAGTA TTAATATTAT TGTTTAGAAA AAAGCTAGGA  
EP6392.txt AACCCCTTGCT AGTTGCAGTA TTAATATTAT TGTTTAGAAA AAAGCTAGGA

D8.txt CATCCATAAA AGAAGTTTGA TGTGTAAAAA ACGTTGAACC AGGAGTCCAA  
SPD010.txt CATCCATAAA AGAAGTTTGA TGTGTAAAAA ACGTTGAACC AGGAGTCCAA  
DPD010.txt CATCCATAAA AGAAGTTTGA TGTGTAAAAA ACGTTGAACC AGGAGTCCAA  
SPD110.txt CATCCATAAA AGAAGTTTGA TGTGTAAAAA ACGTTGAACC AGGAGTCCAA  
XUE1.txt CATCCATAAA AGAAGTTTGA TGTGTAAAAA ACGTTGAACC AGGAGTCCAA  
Pepino.txt CATCCATAAA AGAAGTTTGA TGTGTAAAAA ACGTTGAACC AGGAGTCCAA  
Jin5-508.txt CATCCATAAA AGAAGTTTGA TGTGTAAAAA ACGTTGAACC AGGAGTCCAA  
EP6392.txt CATCCATAAA AGAAGTTTGA TGTGTAAAAA ACGTTGAACC AGGAGTCCAA

D8.txt CCTCAATATG CGAACCTTTA CATCAAAGAG TAAACATAAT TAAGACAAGA  
SPD010.txt CCTCAATATG CGAACCTTTA CATCAAAGAG TAAACATAAT TAAGACAAGA  
DPD010.txt CCTCAATATG CGAACCTTTA CATCAAAGAG TAAACATAAT TAAGACAAGA  
SPD110.txt CCTCAATATG CGAACCTTTA CATCAAAGAG TAAACATAAT TAAGACAAGA  
XUE1.txt CCTCAATATG CGAACCTTTA CATCAAAGAG TAAACATAAT TAAGACAAGA  
Pepino.txt CCTCAATATG CGAACCTTTA CATCAAAGAG TAAACATAAT TAAGACAAGA  
Jin5-508.txt CCTCAATATG CGAACCTTTA CATCAAAGAG TAAACATAAT TAAGACAAGA  
EP6392.txt CCTCAATATG CGAACCTTTA CATCAAAGAG TAAACATAAT TAAGACAAGA

D8.txt ATTAAGAATA AAAGTTTACG AACAGAAGTC CATATTTATT AATTGATTAT  
SPD010.txt ATTAAGAATA AAAGTTTACG AACAGAAGTC CATATTTATT AATTGATTAT  
DPD010.txt ATTAAGAATA AAAGTTTACG AACAGAAGTC CATATTTATT AATTGATTAT  
SPD110.txt ATTAAGAATA AAAGTTTACG AACAGAAGTC CATATTTATT AATTGATTAT

XUE1.txt ATTAAGAATA AAAGTTTACG AACAGAAGTC CATATTTATT AATTGATTAT  
Pepino.txt ATTAAGAATA AAAGTTTACG AACAGAAGTC CATATTTATT AATTGATTAT  
Jin5-508.txt ATTAAGAATA AAAGTTTACG AACAGAAGTC CATATTTATT AATTGATTAT  
EP6392.txt ATTAAGAATA AAAGTTTACG AACAGAAGTC CATATTTATT AATTGATTAT

D8.txt TCCTCCAAGT TTTATTTATT GAAATTGGCA TGCTCCCAA CTCTTCTAAC  
SPD010.txt TCCTCCAAGT TTTATTTATT GAAATTGGCA TGCTCCCAA CTCTTCTAAC  
DPD010.txt TCCTCCAAGT TTTATTTATT GAAATTGGCA TGCTCCCAA CTCTTCTAAC  
SPD110.txt TCCTCCAAGT TTTATTTATT GAAATTGGCA TGCTCCCAA CTCTTCTAAC  
XUE1.txt TCCTCCAAGT TTTATTTATT GAAATTGGCA TGCTCCCAA CTCTTCTAAC  
Pepino.txt TCCTCCAAGT TTTATTTATT GAAATTGGCA TGCTCCCAA CTCTTCTAAC  
Jin5-508.txt TCCTCCAAGT TTTATTTATT GAAATTGGCA TGCTCCCAA CTCTTCTAAC  
EP6392.txt TCCTCCAAGT TTTATTTATT GAAATTGGCA TGCTCCCAA CTCTTCTAAC

D8.txt TAAGGGACTG GAGGCCCTTC CTTTAGTGTG CTTATTTTTT GGATGCCTAT  
SPD010.txt TAAGGGACTG GAGGCCCTTC CTTTAGTGTG CTTATTTTTT GGATGCCTAT  
DPD010.txt TAAGGGACTG GAGGCCCTTC CTTTAGTGTG CTTATTTTTT GGATGCCTAT  
SPD110.txt TAAGGGACTG GAGGCCCTTC CTTTAGTGTG CTTATTTTTT GGATGCCTAT  
XUE1.txt TAAGGGACTG GAGGCCCTTC CTTTAGTGTG CTTATTTTTT GGATGCCTAT  
Pepino.txt TAAGGGACTG GAGGCCCTTC CTTTAGTGTG CTTATTTTTT GGATGCCTAT  
Jin5-508.txt TAAGGGACTG GAGGCCCTTC CTTTAGTGTG CTTATTTTTT GGATGCCTAT  
EP6392.txt TAAGGGACTG GAGGCCCTTC CTTTAGTGTG CTTATTTTTT GGATGCCTAT

D8.txt ATGTTCTTTC ATTTTTCTCA ATGAAAAGTT GCCTTGGACC TCTCCTAACT  
SPD010.txt ATGTTCTTTC ATTTTTCTCA ATGAAAAGTT GCCTTGGACC TCTCCTAACT  
DPD010.txt ATGTTCTTTC ATTTTTCTCA ATGAAAAGTT GCCTTGGACC TCTCCTAACT  
SPD110.txt ATGTTCTTTC ATTTTTCTCA ATGAAAAGTT GCCTTGGACC TCTCCTAACT  
XUE1.txt ATGTTCTTTC ATTTTTCTCA ATGAAAAGTT GCCTTGGACC TCTCCTAACT  
Pepino.txt ATGTTCTTTC ATTTTTCTCA ATGAAAAGTT GCCTTGGACC TCTCCTAACT  
Jin5-508.txt ATGTTCTTTC ATTTTTCTCA ATGAAAAGTT GCCTTGGACC TCTCCTAACT  
EP6392.txt ATGTTCTTTC ATTTTTCTCA ATGAAAAGTT GCCTTGGACC TCTCCTAACT

D8.txt AAAAAACCGA TGCTGACATT CAAGTGAGTT CTACAATGGA TCATTTGCAT  
SPD010.txt AAAAAACCGA TGCTGACATT CAAGTGAGTT CTACAATGGA TCATTTGCAT  
DPD010.txt AAAAAACCGA TGCTGACATT CAAGTGAGTT CTACAATGGA TCATTTGCAT  
SPD110.txt AAAAAACCGA TGCTGACATT CAAGTGAGTT CTACAATGGA TCATTTGCAT  
XUE1.txt AAAAAACCGA TGCTGACATT CAAGTGAGTT CTACAATGGA TCATTTGCAT  
Pepino.txt AAAAAACCGA TGCTGACATT CAAGTGAGTT CTACAATGGA TCATTTGCAT  
Jin5-508.txt AAAAAACCGA TGCTGACATT CAAGTGAGTT CTACAATGGA TCATTTGCAT  
EP6392.txt AAAAAACCGA TGCTGACATT CAAGTGAGTT CTACAATGGA TCATTTGCAT



D8.txt TATTGTTGTC TATTATTTAT TTGCATTTAA TCTTTTCGAT TTAGATTTCC  
SPD010.txt TATTGTTGTC TATTATTTAT TTGCATTTAA TCTTTTCGAT TTAGATTTCC  
DPD010.txt TATTGTTGTC TATTATTTAT TTGCATTTAA TCTTTTCGAT TTAGATTTCC  
SPD110.txt TATTGTTGTC TATTATTTAT TTGCATTTAA TCTTTTCGAT TTAGATTTCC  
XUE1.txt TATTGTTGTC TATTATTTAT TTGCATTTAA TCTTTTCGAT TTAGATTTCC  
Pepino.txt TATTGTTGTC TATTATTTAT TTGCATTTAA TCTTTTCGAT TTAGATTTCC  
Jin5-508.txt TATTGTTGTC TATTATTTAT TTGCATTTAA TCTTTTCGAT TTAGATTTCC  
EP6392.txt TATTGTTGTC TATTATTTAT TTGCATTTAA TCTTTTCGAT TTAGATTTCC

D8.txt CAAGAAATTG CATAACTTTG AAAGTCTAAA GAACCTTTTT CCCTAATTGA  
SPD010.txt CAAGAAATTG CATAACTTTG AAAGTCTAAA GAACCTTTTT CCCTAATTGA  
DPD010.txt CAAGAAATTG CATAACTTTG AAAGTCTAAA GAACCTTTTT CCCTAATTGA  
SPD110.txt CAAGAAATTG CATAACTTTG AAAGTCTAAA GAACCTTTTT CCCTAATTGA  
XUE1.txt CAAGAAATTG CATAACTTTG AAAGTCTAAA GAACCTTTTT CCCTAATTGA  
Pepino.txt CAAGAAATTG CATAACTTTG AAAGTCTAAA GAACCTTTTT CCCTAATTGA  
Jin5-508.txt CAAGAAATTG CATAACTTTG AAAGTCTAAA GAACCTTTTT CCCTAATTGA  
EP6392.txt CAAGAAATTG CATAACTTTG AAAGTCTAAA GAACCTTTTT CCCTAATTGA

D8.txt ATATTCTAGT ATCCTGTTTT GATATCGTAA ATTGGGTTAT AAGGCGTGGA  
SPD010.txt ATATTCTAGT ATCCTGTTTT GATATCGTAA ATTGGGTTAT AAGGCGTGGA  
DPD010.txt ATATTCTAGT ATCCTGTTTT GATATCGTAA ATTGGGTTAT AAGGCGTGGA  
SPD110.txt ATATTCTAGT ATCCTGTTTT GATATCGTAA ATTGGGTTAT AAGGCGTGGA  
XUE1.txt ATATTCTAGT ATCCTGTTTT GATATCGTAA ATTGGGTTAT AAGGCGTGGA  
Pepino.txt ATATTCTAGT ATCCTGTTTT GATATCGTAA ATTGGGTTAT AAGGCGTGGA  
Jin5-508.txt ATATTCTAGT ATCCTGTTTT GATATCGTAA ATTGGGTTAT AAGGCGTGGA  
EP6392.txt ATATTCTAGT ATCCTGTTTT GATATCGTAA ATTGGGTTAT AAGGCGTGGA

D8.txt GATGTCAAAC CATCCAGGAA GTGTTCCCGC ATAAAGGAAG TGCAAGGCAA  
SPD010.txt GATGTCAAAC CATCCAGGAA GTGTTCCCGC ATAAAGGAAG TGCAAGGCAA  
DPD010.txt GATGTCAAAC CATCCAGGAA GTGTTCCCGC ATAAAGGAAG TGCAAGGCAA  
SPD110.txt GATGTCAAAC CATCCAGGAA GTGTTCCCGC ATAAAGGAAG TGCAAGGCAA  
XUE1.txt GATGTCAAAC CATCCAGGAA GTGTTCCCGC ATAAAGGAAG TGCAAGGCAA  
Pepino.txt GATGTCAAAC CATCCAGGAA GTGTTCCCGC ATAAAGGAAG TGCAAGGCAA  
Jin5-508.txt GATGTCAAAC CATCCAGGAA GTGTTCCCGC ATAAAGGAAG TGCAAGGCAA  
EP6392.txt GATGTCAAAC CATCCAGGAA GTGTTCCCGC ATAAAGGAAG TGCAAGGCAA

D8.txt TGTCCCTCAT GGTTTTCTAT GCCATTTATA TTTTCTAACA TAAATCAAAT  
SPD010.txt TGTCCCTCAT GGTTTTCTAT GCCATTTATA TTTTCTAACA TAAATCAAAT

DPD010.txt TGTCCCTCAT GGTTCCTAT GCCATTTATA TTTTCTAACA TAAATCAAAT  
SPD110.txt TGTCCCTCAT GGTTCCTAT GCCATTTATA TTTTCTAACA TAAATCAAAT  
XUE1.txt TGTCCCTCAT GGTTCCTAT GCCATTTATA TTTTCTAACA TAAATCAAAT  
Pepino.txt TGTCCCTCAT GGTTCCTAT GCCATTTATA TTTTCTAACA TAAATCAAAT  
Jin5-508.txt TGTCCCTCAT GGTTCCTAT GCCATTTATA TTTTCTAACA TAAATCAAAT  
EP6392.txt TGTCCCTCAT GGTTCCTAT GCCATTTATA TTTTCTAACA TAAATCAAAT

D8.txt CAACAATCAA CGTAGGAAGT TTAATCTATG CAATCGAACT AGGTGTATGT  
SPD010.txt CAACAATCAA CGTAGGAAGT TTAATCTATG CAATCGAACT AGGTGTATGT  
DPD010.txt CAACAATCAA CGTAGGAAGT TTAATCTATG CAATCGAACT AGGTGTATGT  
SPD110.txt CAACAATCAA CGTAGGAAGT TTAATCTATG CAATCGAACT AGGTGTATGT  
XUE1.txt CAACAATCAA CGTAGGAAGT TTAATCTATG CAATCGAACT AGGTGTATGT  
Pepino.txt CAACAATCAA CGTAGGAAGT TTAATCTATG CAATCGAACT AGGTGTATGT  
Jin5-508.txt CAACAATCAA CGTAGGAAGT TTAATCTATG CAATCGAACT AGGTGTATGT  
EP6392.txt CAACAATCAA CGTAGGAAGT TTAATCTATG CAATCGAACT AGGTGTATGT

D8.txt ACATTTTTTA TCTCATTACG TGTATTTGAG AATGCATGTT TGATCTGTTG  
SPD010.txt ACATTTTTTA TCTCATTACG TGTATTTGAG AATGCATGTT TGATCTGTTG  
DPD010.txt ACATTTTTTA TCTCATTACG TGTATTTGAG AATGCATGTT TGATCTGTTG  
SPD110.txt ACATTTTTTA TCTCATTACG TGTATTTGAG AATGCATGTT TGATCTGTTG  
XUE1.txt ACATTTTTTA TCTCATTACG TGTATTTGAG AATGCATGTT TGATCTGTTG  
Pepino.txt ACATTTTTTA TCTCATTACG TGTATTTGAG AATGCATGTT TGATCTGTTG  
Jin5-508.txt ACATTTTTTA TCTCATTACG TGTATTTGAG AATGCATGTT TGATCTGTTG  
EP6392.txt ACATTTTTTA TCTCATTACG TGTATTTGAG AATGCATGTT TGATCTGTTG

D8.txt GTCAACATTT AGTTTGGTGG ACAATACTCT ATCGTATGTT TGATTTACTG  
SPD010.txt GTCAACATTT AGTTTGGTGG ACAATACTCT ATCGTATGTT TGATTTACTG  
DPD010.txt GTCAACATTT AGTTTGGTGG ACAATACTCT ATCGTATGTT TGATTTACTG  
SPD110.txt GTCAACATTT AGTTTGGTGG ACAATACTCT ATCGTATGTT TGATTTACTG  
XUE1.txt GTCAACATTT AGTTTGGTGG ACAATACTCT ATCGTATGTT TGATTTACTG  
Pepino.txt GTCAACATTT AGTTTGGTGG ACAATACTCT ATCGTATGTT TGATTTACTG  
Jin5-508.txt GTCAACATTT AGTTTGGTGG ACAATACTCT ATCGTATGTT TGATTTACTG  
EP6392.txt GTCAACATTT AGTTTGGTGG ACAATACTCT ATCGTATGTT TGATTTACTG

D8.txt TTCCTTATCA TTTCTTATGT TTTTCTGTAG AAATTATTAG AAAGACAGGG  
SPD010.txt TTCCTTATCA TTTCTTATGT TTTTCTGTAG AAATTATTAG AAAGACAGGG  
DPD010.txt TTCCTTATCA TTTCTTATGT TTTTCTGTAG AAATTATTAG AAAGACAGGG  
SPD110.txt TTCCTTATCA TTTCTTATGT TTTTCTGTAG AAATTATTAG AAAGACAGGG  
XUE1.txt TTCCTTATCA TTTCTTATGT TTTTCTGTAG AAATTATTAG AAAGACAGGG  
Pepino.txt TTCCTTATCA TTTCTTATGT TTTTCTGTAG AAATTATTAG AAAGACAGGG

Jin5-508.txt TTCCTTATCA TTTCTTATGT TTTTCTGTAG AAATTATTAG AAAGACAGGG  
EP6392.txt TTCCTTATCA TTTCTTATGT TTTTCTGTAG AAATTATTAG AAAGACAGGG

D8.txt GTTCAAGTCT GAGAATCTCA TTTACTTGAA GTGCTCTATG TGTCTGAGG  
SPD010.txt GTTCAAGTCT GAGAATCTCA TTTACTTGAA GTGCTCTATG TGTCTGAGG  
DPD010.txt GTTCAAGTCT GAGAATCTCA TTTACTTGAA GTGCTCTATG TGTCTGAGG  
SPD110.txt GTTCAAGTCT GAGAATCTCA TTTACTTGAA GTGCTCTATG TGTCTGAGG  
XUE1.txt GTTCAAGTCT GAGAATCTCA TTTACTTGAA GTGCTCTATG TGTCTGAGG  
Pepino.txt GTTCAAGTCT GAGAATCTCA TTTACTTGAA GTGCTCTATG TGTCTGAGG  
Jin5-508.txt GTTCAAGTCT GAGAATCTCA TTTACTTGAA GTGCTCTATG TGTCTGAGG  
EP6392.txt GTTCAAGTCT GAGAATCTCA TTTACTTGAA GTGCTCTATG TGTCTGAGG

D8.txt AAGTAGATAC TGTACTGAAA GAGTTGGTAC AAATATCAAG AATTATTCAC  
SPD010.txt AAGTAGATAC TGTACTGAAA GAGTTGGTAC AAATATCAAG AATTATTCAC  
DPD010.txt AAGTAGATAC TGTACTGAAA GAGTTGGTAC AAATATCAAG AATTATTCAC  
SPD110.txt AAGTAGATAC TGTACTGAAA GAGTTGGTAC AAATATCAAG AATTATTCAC  
XUE1.txt AAGTAGATAC TGTACTGAAA GAGTTGGTAC AAATATCAAG AATTATTCAC  
Pepino.txt AAGTAGATAC TGTACTGAAA GAGTTGGTAC AAATATCAAG AATTATTCAC  
Jin5-508.txt AAGTAGATAC TGTACTGAAA GAGTTGGTAC AAATATCAAG AATTATTCAC  
EP6392.txt AAGTAGATAC TGTACTGAAA GAGTTGGTAC AAATATCAAG AATTATTCAC

D8.txt TTAAATGAGG TAACCTGAGG AATTTCTCTA GGTCTATGTT TTCTTGTCTG  
SPD010.txt TTAAATGAGG TAACCTGAGG AATTTCTCTA GGTCTATGTT TTCTTGTCTG  
DPD010.txt TTAAATGAGG TAACCTGAGG AATTTCTCTA GGTCTATGTT TTCTTGTCTG  
SPD110.txt TTAAATGAGG TAACCTGAGG AATTTCTCTA GGTCTATGTT TTCTTGTCTG  
XUE1.txt TTAAATGAGG TAACCTGAGG AATTTCTCTA GGTCTATGTT TTCTTGTCTG  
Pepino.txt TTAAATGAGG TAACCTGAGG AATTTCTCTA GGTCTATGTT TTCTTGTCTG  
Jin5-508.txt TTAAATGAGG TAACCTGAGG AATTTCTCTA GGTCTATGTT TTCTTGTCTG  
EP6392.txt TTAAATGAGG TAACCTGAGG AATTTCTCTA GGTCTATGTT TTCTTGTCTG

D8.txt TGTTCCGAAA TATCTAAATT ACTGCTATGC AAGATTTTAC AGCTAAGATT  
SPD010.txt TGTTCCGAAA TATCTAAATT ACTGCTATGC AAGATTTTAC AGCTAAGATT  
DPD010.txt TGTTCCGAAA TATCTAAATT ACTGCTATGC AAGATTTTAC AGCTAAGATT  
SPD110.txt TGTTCCGAAA TATCTAAATT ACTGCTATGC AAGATTTTAC AGCTAAGATT  
XUE1.txt TGTTCCGAAA TATCTAAATT ACTGCTATGC AAGATTTTAC AGCTAAGATT  
Pepino.txt TGTTCCGAAA TATCTAAATT ACTGCTATGC AAGATTTTAC AGCTAAGATT  
Jin5-508.txt TGTTCCGAAA TATCTAAATT ACTGCTATGC AAGATTTTAC AGCTAAGATT  
EP6392.txt TGTTCCGAAA TATCTAAATT ACTGCTATGC AAGATTTTAC AGCTAAGATT

D8.txt CATTGTGCA TTCTCGTGT TTATTTATTT ATTATTTTTT ATGTCCGTGA  
SPD010.txt CATTGTGCA TTCTCGTGT TTATTTATTT ATTATTTTTT ATGTCCGTGA  
DPD010.txt CATTGTGCA TTCTCGTGT TTATTTATTT ATTATTTTTT ATGTCCGTGA  
SPD110.txt CATTGTGCA TTCTCGTGT TTATTTATTT ATTATTTTTT ATGTCCGTGA  
XUE1.txt CATTGTGCA TTCTCGTGT TTATTTATTT ATTATTTTTT ATGTCCGTGA  
Pepino.txt CATTGTGCA TTCTCGTGT TTATTTATTT ATTATTTTTT ATGTCCGTGA  
Jin5-508.txt CATTGTGCA TTCTCGTGT TTATTTATTT ATTATTTTTT ATGTCCGTGA  
EP6392.txt CATTGTGCA TTCTCGTGT TTATTTATTT ATTATTTTTT ATGTCCGTGA

D8.txt AGAGTACTAT TTCCTTGTAT TTGAGTATGA AATTTATCTA ATATATGTAT  
SPD010.txt AGAGTACTAT TTCCTTGTAT TTGAGTATGA AATTTATCTA ATATATGTAT  
DPD010.txt AGAGTACTAT TTCCTTGTAT TTGAGTATGA AATTTATCTA ATATATGTAT  
SPD110.txt AGAGTACTAT TTCCTTGTAT TTGAGTATGA AATTTATCTA ATATATGTAT  
XUE1.txt AGAGTACTAT TTCCTTGTAT TTGAGTATGA AATTTATCTA ATATATGTAT  
Pepino.txt AGAGTACTAT TTCCTTGTAT TTGAGTATGA AATTTATCTA ATATATGTAT  
Jin5-508.txt AGAGTACTAT TTCCTTGTAT TTGAGTATGA AATTTATCTA ATATATGTAT  
EP6392.txt AGAGTACTAT TTCCTTGTAT TTGAGTATGA AATTTATCTA ATATATGTAT

D8.txt TGATAAATAC TAAATAGTAA CTGATGGCTA CTGTAACATT TGAGGTGCAG  
SPD010.txt TGATAAATAC TAAATAGTAA CTGATGGCTA CTGTAACATT TGAGGTGCAG  
DPD010.txt TGATAAATAC TAAATAGTAA CTGATGGCTA CTGTAACATT TGAGGTGCAG  
SPD110.txt TGATAAATAC TAAATAGTAA CTGATGGCTA CTGTAACATT TGAGGTGCAG  
XUE1.txt TGATAAATAC TAAATAGTAA CTGATGGCTA CTGTAACATT TGAGGTGCAG  
Pepino.txt TGATAAATAC TAAATAGTAA CTGATGGCTA CTGTAACATT TGAGGTGCAG  
Jin5-508.txt TGATAAATAC TAAATAGTAA CTGATGGCTA CTGTAACATT TGAGGTGCAG  
EP6392.txt TGATAAATAC TAAATAGTAA CTGATGGCTA CTGTAACATT TGAGGTGCAG

D8.txt CCTGAAATGT ATTTTGGAGA AAATGACGAA GGTACACCAG TAGATTTCTA  
SPD010.txt CCTGAAATGT ATTTTGGAGA AAATGACGAA GGTACACCAG TAGATTTCTA  
DPD010.txt CCTGAAATGT ATTTTGGAGA AAATGACGAA GGTACACCAG TAGATTTCTA  
SPD110.txt CCTGAAATGT ATTTTGGAGA AAATGACGAA GGTACACCAG TAGATTTCTA  
XUE1.txt CCTGAAATGT ATTTTGGAGA AAATGACGAA GGTACACCAG TAGATTTCTA  
Pepino.txt CCTGAAATGT ATTTTGGAGA AAATGACGAA GGTACACCAG TAGATTTCTA  
Jin5-508.txt CCTGAAATGT ATTTTGGAGA AAATGACGAA GGTACACCAG TAGATTTCTA  
EP6392.txt CCTGAAATGT ATTTTGGAGA AAATGACGAA GGTACACCAG TAGATTTCTA

D8.txt CAGCCCCAGG AATGAAGTGG AGACCTTTGA TTCAATAATT TCTCTTCTTG  
SPD010.txt CAGCCCCAGG AATGAAGTGG AGACCTTTGA TTCAATAATT TCTCTTCTTG  
DPD010.txt CAGCCCCAGG AATGAAGTGG AGACCTTTGA TTCAATAATT TCTCTTCTTG  
SPD110.txt CAGCCCCAGG AATGAAGTGG AGACCTTTGA TTCAATAATT TCTCTTCTTG

XUE1.txt CAGCCCCAGG AATGAAGTGG AGACCTTTGA TTCAATAAATT TCTCTTCTTG  
Pepino.txt CAGCCCCAGG AATGAAGTGG AGACCTTTGA TTCAATAAATT TCTCTTCTTG  
Jin5-508.txt CAGCCCCAGG AATGAAGTGG AGACCTTTGA TTCAATAAATT TCTCTTCTTG  
EP6392.txt CAGCCCCAGG AATGAAGTGG AGACCTTTGA TTCAATAAATT TCTCTTCTTG

D8.txt ACCTCTCTCT CTCTAGTTGT ACTCCTGCCC AATTCAGTGT CCTGCAAGAA  
SPD010.txt ACCTCTCTCT CTCTAGTTGT ACTCCTGCCC AATTCAGTGT CCTGCAAGAA  
DPD010.txt ACCTCTCTCT CTCTAGTTGT ACTCCTGCCC AATTCAGTGT CCTGCAAGAA  
SPD110.txt ACCTCTCTCT CTCTAGTTGT ACTCCTGCCC AATTCAGTGT CCTGCAAGAA  
XUE1.txt ACCTCTCTCT CTCTAGTTGT ACTCCTGCCC AATTCAGTGT CCTGCAAGAA  
Pepino.txt ACCTCTCTCT CTCTAGTTGT ACTCCTGCCC AATTCAGTGT CCTGCAAGAA  
Jin5-508.txt ACCTCTCTCT CTCTAGTTGT ACTCCTGCCC AATTCAGTGT CCTGCAAGAA  
EP6392.txt ACCTCTCTCT CTCTAGTTGT ACTCCTGCCC AATTCAGTGT CCTGCAAGAA

D8.txt TTACGCAAGG CAGTTATTCA TATGATCCAT GAGTATGGAA ATGTACACAG  
SPD010.txt TTACGCAAGG CAGTTATTCA TATGATCCAT GAGTATGGAA ATGTACACAG  
DPD010.txt TTACGCAAGG CAGTTATTCA TATGATCCAT GAGTATGGAA ATGTACACAG  
SPD110.txt TTACGCAAGG CAGTTATTCA TATGATCCAT GAGTATGGAA ATGTACACAG  
XUE1.txt TTACGCAAGG CAGTTATTCA TATGATCCAT GAGTATGGAA ATGTACACAG  
Pepino.txt TTACGCAAGG CAGTTATTCA TATGATCCAT GAGTATGGAA ATGTACACAG  
Jin5-508.txt TTACGCAAGG CAGTTATTCA TATGATCCAT GAGTATGGAA ATGTACACAG  
EP6392.txt TTACGCAAGG CAGTTATTCA TATGATCCAT GAGTATGGAA ATGTACACAG

D8.txt TATGGTGGCT AAAACTTTGG AAAACAGCTG TGAGAAAGGA AACTGTTTGT  
SPD010.txt TATGGTGGCT AAAACTTTGG AAAACAGCTG TGAGAAAGGA AACTGTTTGT  
DPD010.txt TATGGTGGCT AAAACTTTGG AAAACAGCTG TGAGAAAGGA AACTGTTTGT  
SPD110.txt TATGGTGGCT AAAACTTTGG AAAACAGCTG TGAGAAAGGA AACTGTTTGT  
XUE1.txt TATGGTGGCT AAAACTTTGG AAAACAGCTG TGAGAAAGGA AACTGTTTGT  
Pepino.txt TATGGTGGCT AAAACTTTGG AAAACAGCTG TGAGAAAGGA AACTGTTTGT  
Jin5-508.txt TATGGTGGCT AAAACTTTGG AAAACAGCTG TGAGAAAGGA AACTGTTTGT  
EP6392.txt TATGGTGGCT AAAACTTTGG AAAACAGCTG TGAGAAAGGA AACTGTTTGT

D8.txt TAGAGTGGGG TGAGAGCAAT GGTGTTAGAA CAAGCTTGAA GATAGCTTGT  
SPD010.txt TAGAGTGGGG TGAGAGCAAT GGTGTTAGAA CAAGCTTGAA GATAGCTTGT  
DPD010.txt TAGAGTGGGG TGAGAGCAAT GGTGTTAGAA CAAGCTTGAA GATAGCTTGT  
SPD110.txt TAGAGTGGGG TGAGAGCAAT GGTGTTAGAA CAAGCTTGAA GATAGCTTGT  
XUE1.txt TAGAGTGGGG TGAGAGCAAT GGTGTTAGAA CAAGCTTGAA GATAGCTTGT  
Pepino.txt TAGAGTGGGG TGAGAGCAAT GGTGTTAGAA CAAGCTTGAA GATAGCTTGT  
Jin5-508.txt TAGAGTGGGG TGAGAGCAAT GGTGTTAGAA CAAGCTTGAA GATAGCTTGT  
EP6392.txt TAGAGTGGGG TGAGAGCAAT GGTGTTAGAA CAAGCTTGAA GATAGCTTGT

D8.txt AAGTCCTCAC CATTACATTT TCTTGGCAAT ATTCGTATAA TCCACATCTA  
SPD010.txt AAGTCCTCAC CATTACATTT TCTTGGCAAT ATTCGTATAA TCCACATCTA  
DPD010.txt AAGTCCTCAC CATTACATTT TCTTGGCAAT ATTCGTATAA TCCACATCTA  
SPD110.txt AAGTCCTCAC CATTACATTT TCTTGGCAAT ATTCGTATAA TCCACATCTA  
XUE1.txt AAGTCCTCAC CATTACATTT TCTTGGCAAT ATTCGTATAA TCCACATCTA  
Pepino.txt AAGTCCTCAC CATTACATTT TCTTGGCAAT ATTCGTATAA TCCACATCTA  
Jin5-508.txt AAGTCCTCAC CATTACATTT TCTTGGCAAT ATTCGTATAA TCCACATCTA  
EP6392.txt AAGTCCTCAC CATTACATTT TCTTGGCAAT ATTCGTATAA TCCACATCTA

D8.txt TTGATGCTTG ATTTGATTTT GAATTGTTGT GTAATTATAA GTTGGAGACA  
SPD010.txt TTGATGCTTG ATTTGATTTT GAATTGTTGT GTAATTATAA GTTGGAGACA  
DPD010.txt TTGATGCTTG ATTTGATTTT GAATTGTTGT GTAATTATAA GTTGGAGACA  
SPD110.txt TTGATGCTTG ATTTGATTTT GAATTGTTGT GTAATTATAA GTTGGAGACA  
XUE1.txt TTGATGCTTG ATTTGATTTT GAATTGTTGT GTAATTATAA GTTGGAGACA  
Pepino.txt TTGATGCTTG ATTTGATTTT GAATTGTTGT GTAATTATAA GTTGGAGACA  
Jin5-508.txt TTGATGCTTG ATTTGATTTT GAATTGTTGT GTAATTATAA GTTGGAGACA  
EP6392.txt TTGATGCTTG ATTTGATTTT GAATTGTTGT GTAATTATAA GTTGGAGACA

D8.txt TTGGAGGTGC ACCGAAGTTT CACAATACCA AACGATTGTA ATTTGCATGC  
SPD010.txt TTGGAGGTGC ACCGAAGTTT CACAATACCA AACGATTGTA ATTTGCATGC  
DPD010.txt TTGGAGGTGC ACCGAAGTTT CACAATACCA AACGATTGTA ATTTGCATGC  
SPD110.txt TTGGAGGTGC ACCGAAGTTT CACAATACCA AACGATTGTA ATTTGCATGC  
XUE1.txt TTGGAGGTGC ACCGAAGTTT CACAATACCA AACGATTGTA ATTTGCATGC  
Pepino.txt TTGGAGGTGC ACCGAAGTTT CACAATACCA AACGATTGTA ATTTGCATGC  
Jin5-508.txt TTGGAGGTGC ACCGAAGTTT CACAATACCA AACGATTGTA ATTTGCATGC  
EP6392.txt TTGGAGGTGC ACCGAAGTTT CACAATACCA AACGATTGTA ATTTGCATGC

D8.txt TTTATTCTTC ATATAGATGT TGAAGGTGCT GGTCGAGGAA CCATAGCCAA  
SPD010.txt TTTATTCTTC ATATAGATGT TGAAGGTGCT GGTCGAGGAA CCATAGCCAA  
DPD010.txt TTTATTCTTC ATATAGATGT TGAAGGTGCT GGTCGAGGAA CCATAGCCAA  
SPD110.txt TTTATTCTTC ATATAGATGT TGAAGGTGCT GGTCGAGGAA CCATAGCCAA  
XUE1.txt TTTATTCTTC ATATAGATGT TGAAGGTGCT GGTCGAGGAA CCATAGCCAA  
Pepino.txt TTTATTCTTC ATATAGATGT TGAAGGTGCT GGTCGAGGAA CCATAGCCAA  
Jin5-508.txt TTTATTCTTC ATATAGATGT TGAAGGTGCT GGTCGAGGAA CCATAGCCAA  
EP6392.txt TTTATTCTTC ATATAGATGT TGAAGGTGCT GGTCGAGGAA CCATAGCCAA

D8.txt AGAAGATTTA GACGTTGGTG AACTGTATT GGAGATCCCT CTGGCTATTA  
SPD010.txt AGAAGATTTA GACGTTGGTG AACTGTATT GGAGATCCCT CTGGCTATTA

DPD010.txt AGAAGATTTA GACGTTGGTG ACACTGTATT GGAGATCCCT CTGGCTATTA  
SPD110.txt AGAAGATTTA GACGTTGGTG ACACTGTATT GGAGATCCCT CTGGCTATTA  
XUE1.txt AGAAGATTTA GACGTTGGTG ACACTGTATT GGAGATCCCT CTGGCTATTA  
Pepino.txt AGAAGATTTA GACGTTGGTG ACACTGTATT GGAGATCCCT CTGGCTATTA  
Jin5-508.txt AGAAGATTTA GACGTTGGTG ACACTGTATT GGAGATCCCT CTGGCTATTA  
EP6392.txt AGAAGATTTA GACGTTGGTG ACACTGTATT GGAGATCCCT CTGGCTATTA

D8.txt TTATTTCTGA GGAACCTGTG CAGAAAAGCA CCATGGTAAG TTCATCGCTA  
SPD010.txt TTATTTCTGA GGAACCTGTG CAGAAAAGCA CCATGGTAAG TTCATCGCTA  
DPD010.txt TTATTTCTGA GGAACCTGTG CAGAAAAGCA CCATGGTAAG TTCATCGCTA  
SPD110.txt TTATTTCTGA GGAACCTGTG CAGAAAAGCA CCATGGTAAG TTCATCGCTA  
XUE1.txt TTATTTCTGA GGAACCTGTG CAGAAAAGCA CCATGGTAAG TTCATCGCTA  
Pepino.txt TTATTTCTGA GGAACCTGTG CAGAAAAGCA CCATGGTAAG TTCATCGCTA  
Jin5-508.txt TTATTTCTGA GGAACCTGTG CAGAAAAGCA CCATGGTAAG TTCATCGCTA  
EP6392.txt TTATTTCTGA GGAACCTGTG CAGAAAAGCA CCATGGTAAG TTCATCGCTA

D8.txt AGAAGCTGTT GTAGTTGCTT AAATTTTAAG TAGTCTAGAA CTTTCCTGAT  
SPD010.txt AGAAGCTGTT GTAGTTGCTT AAATTTTAAG TAGTCTAGAA CTTTCCTGAT  
DPD010.txt AGAAGCTGTT GTAGTTGCTT AAATTTTAAG TAGTCTAGAA CTTTCCTGAT  
SPD110.txt AGAAGCTGTT GTAGTTGCTT AAATTTTAAG TAGTCTAGAA CTTTCCTGAT  
XUE1.txt AGAAGCTGTT GTAGTTGCTT AAATTTTAAG TAGTCTAGAA CTTTCCTGAT  
Pepino.txt AGAAGCTGTT GTAGTTGCTT AAATTTTAAG TAGTCTAGAA CTTTCCTGAT  
Jin5-508.txt AGAAGCTGTT GTAGTTGCTT AAATTTTAAG TAGTCTAGAA CTTTCCTGAT  
EP6392.txt AGAAGCTGTT GTAGTTGCTT AAATTTTAAG TAGTCTAGAA CTTTCCTGAT

D8.txt AAAAAAATAG GATCAAAATT CAAAATTAAT CCTGGCCTTT ATTTCTAATG  
SPD010.txt AAAAAAATAG GATCAAAATT CAAAATTAAT CCTGGCCTTT ATTTCTAATG  
DPD010.txt AAAAAAATAG GATCAAAATT CAAAATTAAT CCTGGCCTTT ATTTCTAATG  
SPD110.txt AAAAAAATAG GATCAAAATT CAAAATTAAT CCTGGCCTTT ATTTCTAATG  
XUE1.txt AAAAAAATAG GATCAAAATT CAAAATTAAT CCTGGCCTTT ATTTCTAATG  
Pepino.txt AAAAAAATAG GATCAAAATT CAAAATTAAT CCTGGCCTTT ATTTCTAATG  
Jin5-508.txt AAAAAAATAG GATCAAAATT CAAAATTAAT CCTGGCCTTT ATTTCTAATG  
EP6392.txt AAAAAAATAG GATCAAAATT CAAAATTAAT CCTGGCCTTT ATTTCTAATG

D8.txt AATTCAATTC TCATCACACA GATGCTTTTC AGTTCCCAT CTCATCTTTA  
SPD010.txt AATTCAATTC TCATCACACA GATGCTTTTC AGTTCCCAT CTCATCTTTA  
DPD010.txt AATTCAATTC TCATCACACA GATGCTTTTC AGTTCCCAT CTCATCTTTA  
SPD110.txt AATTCAATTC TCATCACACA GATGCTTTTC AGTTCCCAT CTCATCTTTA  
XUE1.txt AATTCAATTC TCATCACACA GATGCTTTTC AGTTCCCAT CTCATCTTTA  
Pepino.txt AATTCAATTC TCATCACACA GATGCTTTTC AGTTCCCAT CTCATCTTTA

Jin5-508.txt AATTCAATTC TCATCACACA GATGCTTTTC AGTTCCCCAT CTCATCTTTA  
EP6392.txt AATTCAATTC TCATCACACA GATGCTTTTC AGTTCCCCAT CTCATCTTTA

D8.txt ACAATGTTCT GTTGCTTGTG TAAGTAAATG CTTATATCTA GAGTTAAAGT  
SPD010.txt ACAATGTTCT GTTGCTTGTG TAAGTAAATG CTTATATCTA GAGTTAAAGT  
DPD010.txt ACAATGTTCT GTTGCTTGTG TAAGTAAATG CTTATATCTA GAGTTAAAGT  
SPD110.txt ACAATGTTCT GTTGCTTGTG TAAGTAAATG CTTATATCTA GAGTTAAAGT  
XUE1.txt ACAATGTTCT GTTGCTTGTG TAAGTAAATG CTTATATCTA GAGTTAAAGT  
Pepino.txt ACAATGTTCT GTTGCTTGTG TAAGTAAATG CTTATATCTA GAGTTAAAGT  
Jin5-508.txt ACAATGTTCT GTTGCTTGTG TAAGTAAATG CTTATATCTA GAGTTAAAGT  
EP6392.txt ACAATGTTCT GTTGCTTGTG TAAGTAAATG CTTATATCTA GAGTTAAAGT

D8.txt TGGTTTAAAG AATTTTTAGG GATTTTACAT TTTCAAATA TTCTATCATT  
SPD010.txt TGGTTTAAAG AATTTTTAGG GATTTTACAT TTTCAAATA TTCTATCATT  
DPD010.txt TGGTTTAAAG AATTTTTAGG GATTTTACAT TTTCAAATA TTCTATCATT  
SPD110.txt TGGTTTAAAG AATTTTTAGG GATTTTACAT TTTCAAATA TTCTATCATT  
XUE1.txt TGGTTTAAAG AATTTTTAGG GATTTTACAT TTTCAAATA TTCTATCATT  
Pepino.txt TGGTTTAAAG AATTTTTAGG GATTTTACAT TTTCAAATA TTCTATCATT  
Jin5-508.txt TGGTTTAAAG AATTTTTAGG GATTTTACAT TTTCAAATA TTCTATCATT  
EP6392.txt TGGTTTAAAG AATTTTTAGG GATTTTACAT TTTCAAATA TTCTATCATT

D8.txt TAATGAAGCT AAGGAGAGAA CTTTTCTCTC CACCAGTTAA GGTGCATTGA  
SPD010.txt TAATGAAGCT AAGGAGAGAA CTTTTCTCTC CACCAGTTAA GGTGCATTGA  
DPD010.txt TAATGAAGCT AAGGAGAGAA CTTTTCTCTC CACCAGTTAA GGTGCATTGA  
SPD110.txt TAATGAAGCT AAGGAGAGAA CTTTTCTCTC CACCAGTTAA GGTGCATTGA  
XUE1.txt TAATGAAGCT AAGGAGAGAA CTTTTCTCTC CACCAGTTAA GGTGCATTGA  
Pepino.txt TAATGAAGCT AAGGAGAGAA CTTTTCTCTC CACCAGTTAA GGTGCATTGA  
Jin5-508.txt TAATGAAGCT AAGGAGAGAA CTTTTCTCTC CACCAGTTAA GGTGCATTGA  
EP6392.txt TAATGAAGCT AAGGAGAGAA CTTTTCTCTC CACCAGTTAA GGTGCATTGA

D8.txt CTGCCTTGTT CCTCCAATCA TTCATGCTTT CACTATTGAT TACAATAATT  
SPD010.txt CTGCCTTGTT CCTCCAATCA TTCATGCTTT CACTATTGAT TACAATAATT  
DPD010.txt CTGCCTTGTT CCTCCAATCA TTCATGCTTT CACTATTGAT TACAATAATT  
SPD110.txt CTGCCTTGTT CCTCCAATCA TTCATGCTTT CACTATTGAT TACAATAATT  
XUE1.txt CTGCCTTGTT CCTCCAATCA TTCATGCTTT CACTATTGAT TACAATAATT  
Pepino.txt CTGCCTTGTT CCTCCAATCA TTCATGCTTT CACTATTGAT TACAATAATT  
Jin5-508.txt CTGCCTTGTT CCTCCAATCA TTCATGCTTT CACTATTGAT TACAATAATT  
EP6392.txt CTGCCTTGTT CCTCCAATCA TTCATGCTTT CACTATTGAT TACAATAATT



|              |            |            |            |            |            |
|--------------|------------|------------|------------|------------|------------|
| D8.txt       | TTAGACTTTA | AGTGATCTGG | TTGAAGTTGC | ACCAATTTTG | TGCAAAAAAC |
| SPD010.txt   | TTAGACTTTA | AGTGATCTGG | TTGAAGTTGC | ACCAATTTTG | TGCAAAAAAC |
| DPD010.txt   | TTAGACTTTA | AGTGATCTGG | TTGAAGTTGC | ACCAATTTTG | TGCAAAAAAC |
| SPD110.txt   | TTAGACTTTA | AGTGATCTGG | TTGAAGTTGC | ACCAATTTTG | TGCAAAAAAC |
| XUE1.txt     | TTAGACTTTA | AGTGATCTGG | TTGAAGTTGC | ACCAATTTTG | TGCAAAAAAC |
| Pepino.txt   | TTAGACTTTA | AGTGATCTGG | TTGAAGTTGC | ACCAATTTTG | TGCAAAAAAC |
| Jin5-508.txt | TTAGACTTTA | AGTGATCTGG | TTGAAGTTGC | ACCAATTTTG | TGCAAAAAAC |
| EP6392.txt   | TTAGACTTTA | AGTGATCTGG | TTGAAGTTGC | ACCAATTTTG | TGCAAAAAAC |

|              |            |            |            |            |            |
|--------------|------------|------------|------------|------------|------------|
| D8.txt       | TTTTCATAAG | TATCTGCAGT | TGGGATTGGT | GCTTCCTCAC | ATCACACTAG |
| SPD010.txt   | TTTTCATAAG | TATCTGCAGT | TGGGATTGGT | GCTTCCTCAC | ATCACACTAG |
| DPD010.txt   | TTTTCATAAG | TATCTGCAGT | TGGGATTGGT | GCTTCCTCAC | ATCACACTAG |
| SPD110.txt   | TTTTCATAAG | TATCTGCAGT | TGGGATTGGT | GCTTCCTCAC | ATCACACTAG |
| XUE1.txt     | TTTTCATAAG | TATCTGCAGT | TGGGATTGGT | GCTTCCTCAC | ATCACACTAG |
| Pepino.txt   | TTTTCATAAG | TATCTGCAGT | TGGGATTGGT | GCTTCCTCAC | ATCACACTAG |
| Jin5-508.txt | TTTTCATAAG | TATCTGCAGT | TGGGATTGGT | GCTTCCTCAC | ATCACACTAG |
| EP6392.txt   | TTTTCATAAG | TATCTGCAGT | TGGGATTGGT | GCTTCCTCAC | ATCACACTAG |

|              |             |            |            |            |             |
|--------------|-------------|------------|------------|------------|-------------|
| D8.txt       | TTGCCATTTCG | TATAACCAAC | CATGCATAAT | TGTATTCAAG | TTGCTTTTTCG |
| SPD010.txt   | TTGCCATTTCG | TATAACCAAC | CATGCATAAT | TGTATTCAAG | TTGCTTTTTCG |
| DPD010.txt   | TTGCCATTTCG | TATAACCAAC | CATGCATAAT | TGTATTCAAG | TTGCTTTTTCG |
| SPD110.txt   | TTGCCATTTCG | TATAACCAAC | CATGCATAAT | TGTATTCAAG | TTGCTTTTTCG |
| XUE1.txt     | TTGCCATTTCG | TATAACCAAC | CATGCATAAT | TGTATTCAAG | TTGCTTTTTCG |
| Pepino.txt   | TTGCCATTTCG | TATAACCAAC | CATGCATAAT | TGTATTCAAG | TTGCTTTTTCG |
| Jin5-508.txt | TTGCCATTTCG | TATAACCAAC | CATGCATAAT | TGTATTCAAG | TTGCTTTTTCG |
| EP6392.txt   | TTGCCATTTCG | TATAACCAAC | CATGCATAAT | TGTATTCAAG | TTGCTTTTTCG |

|              |            |            |            |            |            |
|--------------|------------|------------|------------|------------|------------|
| D8.txt       | TTGATGCAAC | TGCTAGTTAA | TTTCTTTGGA | AAAGCTAATG | AGATAGAGCC |
| SPD010.txt   | TTGATGCAAC | TGCTAGTTAA | TTTCTTTGGA | AAAGCTAATG | AGATAGAGCC |
| DPD010.txt   | TTGATGCAAC | TGCTAGTTAA | TTTCTTTGGA | AAAGCTAATG | AGATAGAGCC |
| SPD110.txt   | TTGATGCAAC | TGCTAGTTAA | TTTCTTTGGA | AAAGCTAATG | AGATAGAGCC |
| XUE1.txt     | TTGATGCAAC | TGCTAGTTAA | TTTCTTTGGA | AAAGCTAATG | AGATAGAGCC |
| Pepino.txt   | TTGATGCAAC | TGCTAGTTAA | TTTCTTTGGA | AAAGCTAATG | AGATAGAGCC |
| Jin5-508.txt | TTGATGCAAC | TGCTAGTTAA | TTTCTTTGGA | AAAGCTAATG | AGATAGAGCC |
| EP6392.txt   | TTGATGCAAC | TGCTAGTTAA | TTTCTTTGGA | AAAGCTAATG | AGATAGAGCC |

|            |            |            |            |            |             |
|------------|------------|------------|------------|------------|-------------|
| D8.txt     | TGGCCTAAGG | TTTATAGATG | AGGTACATTT | CCAGATAGAC | CATTTTCATTA |
| SPD010.txt | TGGCCTAAGG | TTTATAGATG | AGGTACATTT | CCAGATAGAC | CATTTTCATTA |
| DPD010.txt | TGGCCTAAGG | TTTATAGATG | AGGTACATTT | CCAGATAGAC | CATTTTCATTA |
| SPD110.txt | TGGCCTAAGG | TTTATAGATG | AGGTACATTT | CCAGATAGAC | CATTTTCATTA |

XUE1.txt TGGCCTAAGG TTTATAGATG AGGTACATTT CCAGATAGAC CATTTCATTA  
Pepino.txt TGGCCTAAGG TTTATAGATG AGGTACATTT CCAGATAGAC CATTTCATTA  
Jin5-508.txt TGGCCTAAGG TTTATAGATG AGGTACATTT CCAGATAGAC CATTTCATTA  
EP6392.txt TGGCCTAAGG TTTATAGATG AGGTACATTT CCAGATAGAC CATTTCATTA

D8.txt GGAGACATTA TTTCTCACCC CACTTGTCTT TAGATGGTCT TTGGATATGT  
SPD010.txt GGAGACATTA TTTCTCACCC CACTTGTCTT TAGATGGTCT TTGGATATGT  
DPD010.txt GGAGACATTA TTTCTCACCC CACTTGTCTT TAGATGGTCT TTGGATATGT  
SPD110.txt GGAGACATTA TTTCTCACCC CACTTGTCTT TAGATGGTCT TTGGATATGT  
XUE1.txt GGAGACATTA TTTCTCACCC CACTTGTCTT TAGATGGTCT TTGGATATGT  
Pepino.txt GGAGACATTA TTTCTCACCC CACTTGTCTT TAGATGGTCT TTGGATATGT  
Jin5-508.txt GGAGACATTA TTTCTCACCC CACTTGTCTT TAGATGGTCT TTGGATATGT  
EP6392.txt GGAGACATTA TTTCTCACCC CACTTGTCTT TAGATGGTCT TTGGATATGT

D8.txt AATCACATTG AGACATTGAG TATCAAACCTA TGGTAGTTAG AATTGCTATT  
SPD010.txt AATCACATTG AGACATTGAG TATCAAACCTA TGGTAGTTAG AATTGCTATT  
DPD010.txt AATCACATTG AGACATTGAG TATCAAACCTA TGGTAGTTAG AATTGCTATT  
SPD110.txt AATCACATTG AGACATTGAG TATCAAACCTA TGGTAGTTAG AATTGCTATT  
XUE1.txt AATCACATTG AGACATTGAG TATCAAACCTA TGGTAGTTAG AATTGCTATT  
Pepino.txt AATCACATTG AGACATTGAG TATCAAACCTA TGGTAGTTAG AATTGCTATT  
Jin5-508.txt AATCACATTG AGACATTGAG TATCAAACCTA TGGTAGTTAG AATTGCTATT  
EP6392.txt AATCACATTG AGACATTGAG TATCAAACCTA TGGTAGTTAG AATTGCTATT

D8.txt TGAAGTGAAT GGCGATAGTA CAGGTTTCAG TATTATTATT ATTATTTTAT  
SPD010.txt TGAAGTGAAT GGCGATAGTA CAGGTTTCAG TATTATTATT ATTATTTTAT  
DPD010.txt TGAAGTGAAT GGCGATAGTA CAGGTTTCAG TATTATTATT ATTATTTTAT  
SPD110.txt TGAAGTGAAT GGCGATAGTA CAGGTTTCAG TATTATTATT ATTATTTTAT  
XUE1.txt TGAAGTGAAT GGCGATAGTA CAGGTTTCAG TATTATTATT ATTATTTTAT  
Pepino.txt TGAAGTGAAT GGCGATAGTA CAGGTTTCAG TATTATTATT ATTATTTTAT  
Jin5-508.txt TGAAGTGAAT GGCGATAGTA CAGGTTTCAG TATTATTATT ATTATTTTAT  
EP6392.txt TGAAGTGAAT GGCGATAGTA CAGGTTTCAG TATTATTATT ATTATTTTAT

D8.txt ATTTTGAATT TATAGCATT A TG TAGAGAT GGAGAAGTTT GTAATGAATG  
SPD010.txt ATTTTGAATT TATAGCATT A TG TAGAGAT GGAGAAGTTT GTAATGAATG  
DPD010.txt ATTTTGAATT TATAGCATT A TG TAGAGAT GGAGAAGTTT GTAATGAATG  
SPD110.txt ATTTTGAATT TATAGCATT A TG TAGAGAT GGAGAAGTTT GTAATGAATG  
XUE1.txt ATTTTGAATT TATAGCATT A TG TAGAGAT GGAGAAGTTT GTAATGAATG  
Pepino.txt ATTTTGAATT TATAGCATT A TG TAGAGAT GGAGAAGTTT GTAATGAATG  
Jin5-508.txt ATTTTGAATT TATAGCATT A TG TAGAGAT GGAGAAGTTT GTAATGAATG  
EP6392.txt ATTTTGAATT TATAGCATT A TG TAGAGAT GGAGAAGTTT GTAATGAATG

D8.txt ATGACAAAGA GAAGATAGAG CCATCATGAC TTTATGCTTC AATTTTCAGTA  
SPD010.txt ATGACAAAGA GAAGATAGAG CCATCATGAC TTTATGCTTC AATTTTCAGTA  
DPD010.txt ATGACAAAGA GAAGATAGAG CCATCATGAC TTTATGCTTC AATTTTCAGTA  
SPD110.txt ATGACAAAGA GAAGATAGAG CCATCATGAC TTTATGCTTC AATTTTCAGTA  
XUE1.txt ATGACAAAGA GAAGATAGAG CCATCATGAC TTTATGCTTC AATTTTCAGTA  
Pepino.txt ATGACAAAGA GAAGATAGAG CCATCATGAC TTTATGCTTC AATTTTCAGTA  
Jin5-508.txt ATGACAAAGA GAAGATAGAG CCATCATGAC TTTATGCTTC AATTTTCAGTA  
EP6392.txt ATGACAAAGA GAAGATAGAG CCATCATGAC TTTATGCTTC AATTTTCAGTA

D8.txt TCCCGTATTA TCAAAGGTTG AAGGCATGCT ACCTGAGACA ATGACGTTGT  
SPD010.txt TCCCGTATTA TCAAAGGTTG AAGGCATGCT ACCTGAGACA ATGACGTTGT  
DPD010.txt TCCCGTATTA TCAAAGGTTG AAGGCATGCT ACCTGAGACA ATGACGTTGT  
SPD110.txt TCCCGTATTA TCAAAGGTTG AAGGCATGCT ACCTGAGACA ATGACGTTGT  
XUE1.txt TCCCGTATTA TCAAAGGTTG AAGGCATGCT ACCTGAGACA ATGACGTTGT  
Pepino.txt TCCCGTATTA TCAAAGGTTG AAGGCATGCT ACCTGAGACA ATGACGTTGT  
Jin5-508.txt TCCCGTATTA TCAAAGGTTG AAGGCATGCT ACCTGAGACA ATGACGTTGT  
EP6392.txt TCCCGTATTA TCAAAGGTTG AAGGCATGCT ACCTGAGACA ATGACGTTGT

D8.txt TATGGAGTAT GAAGGAGAAG CACATTGTCG ATTCCGAATT CAGGGTCTAC  
SPD010.txt TATGGAGTAT GAAGGAGAAG CACATTGTCG ATTCCGAATT CAGGGTCTAC  
DPD010.txt TATGGAGTAT GAAGGAGAAG CACATTGTCG ATTCCGAATT CAGGGTCTAC  
SPD110.txt TATGGAGTAT GAAGGAGAAG CACATTGTCG ATTCCGAATT CAGGGTCTAC  
XUE1.txt TATGGAGTAT GAAGGAGAAG CACATTGTCG ATTCCGAATT CAGGGTCTAC  
Pepino.txt TATGGAGTAT GAAGGAGAAG CACATTGTCG ATTCCGAATT CAGGGTCTAC  
Jin5-508.txt TATGGAGTAT GAAGGAGAAG CACATTGTCG ATTCCGAATT CAGGGTCTAC  
EP6392.txt TATGGAGTAT GAAGGAGAAG CACATTGTCG ATTCCGAATT CAGGGTCTAC

D8.txt TTTGATACAT TACCAGAAGC ATTTAATACT GGTATTACCA TTACCTTTAG  
SPD010.txt TTTGATACAT TACCAGAAGC ATTTAATACT GGTATTACCA TTACCTTTAG  
DPD010.txt TTTGATACAT TACCAGAAGC ATTTAATACT GGTATTACCA TTACCTTTAG  
SPD110.txt TTTGATACAT TACCAGAAGC ATTTAATACT GGTATTACCA TTACCTTTAG  
XUE1.txt TTTGATACAT TACCAGAAGC ATTTAATACT GGTATTACCA TTACCTTTAG  
Pepino.txt TTTGATACAT TACCAGAAGC ATTTAATACT GGTATTACCA TTACCTTTAG  
Jin5-508.txt TTTGATACAT TACCAGAAGC ATTTAATACT GGTATTACCA TTACCTTTAG  
EP6392.txt TTTGATACAT TACCAGAAGC ATTTAATACT GGTATTACCA TTACCTTTAG

D8.txt ACTGTTCCCA CTGAGTTTTG TATGTTTCATT GTGTTTCAGCA TGAGATTTGG  
SPD010.txt ACTGTTCCCA CTGAGTTTTG TATGTTTCATT GTGTTTCAGCA TGAGATTTGG

DPD010.txt ACTGTTCCCA CTGAGTTTTG TATG TTCATT GTG TTCAGCA TGAGATTTGG  
SPD110.txt ACTGTTCCCA CTGAGTTTTG TATG TTCATT GTG TTCAGCA TGAGATTTGG  
XUE1.txt ACTGTTCCCA CTGAGTTTTG TATG TTCATT GTG TTCAGCA TGAGATTTGG  
Pepino.txt ACTGTTCCCA CTGAGTTTTG TATG TTCATT GTG TTCAGCA TGAGATTTGG  
Jin5-508.txt ACTGTTCCCA CTGAGTTTTG TATG TTCATT GTG TTCAGCA TGAGATTTGG  
EP6392.txt ACTGTTCCCA CTGAGTTTTG TATG TTCATT GTG TTCAGCA TGAGATTTGG

D8.txt GTGTACACTT GTCAGATGAT TGATTTTCCT TTCTGTAGTT TTTTCAGTTA  
SPD010.txt GTGTACACTT GTCAGATGAT TGATTTTCCT TTCTGTAGTT TTTTCAGTTA  
DPD010.txt GTGTACACTT GTCAGATGAT TGATTTTCCT TTCTGTAGTT TTTTCAGTTA  
SPD110.txt GTGTACACTT GTCAGATGAT TGATTTTCCT TTCTGTAGTT TTTTCAGTTA  
XUE1.txt GTGTACACTT GTCAGATGAT TGATTTTCCT TTCTGTAGTT TTTTCAGTTA  
Pepino.txt GTGTACACTT GTCAGATGAT TGATTTTCCT TTCTGTAGTT TTTTCAGTTA  
Jin5-508.txt GTGTACACTT GTCAGATGAT TGATTTTCCT TTCTGTAGTT TTTTCAGTTA  
EP6392.txt GTGTACACTT GTCAGATGAT TGATTTTCCT TTCTGTAGTT TTTTCAGTTA

D8.txt GCAACTTAGC AGTTAGCACA ATGGTCTTTT TATGTCTATT GCCATACCGC  
SPD010.txt GCAACTTAGC AGTTAGCACA ATGGTCTTTT TATGTCTATT GCCATACCGC  
DPD010.txt GCAACTTAGC AGTTAGCACA ATGGTCTTTT TATGTCTATT GCCATACCGC  
SPD110.txt GCAACTTAGC AGTTAGCACA ATGGTCTTTT TATGTCTATT GCCATACCGC  
XUE1.txt GCAACTTAGC AGTTAGCACA ATGGTCTTTT TATGTCTATT GCCATACCGC  
Pepino.txt GCAACTTAGC AGTTAGCACA ATGGTCTTTT TATGTCTATT GCCATACCGC  
Jin5-508.txt GCAACTTAGC AGTTAGCACA ATGGTCTTTT TATGTCTATT GCCATACCGC  
EP6392.txt GCAACTTAGC AGTTAGCACA ATGGTCTTTT TATGTCTATT GCCATACCGC

D8.txt TGCATGCGAG TGTATAAATT TGTTTTGACC TTTATGTATG AATAAGGAAA  
SPD010.txt TGCATGCGAG TGTATAAATT TGTTTTGACC TTTATGTATG AATAAGGAAA  
DPD010.txt TGCATGCGAG TGTATAAATT TGTTTTGACC TTTATGTATG AATAAGGAAA  
SPD110.txt TGCATGCGAG TGTATAAATT TGTTTTGACC TTTATGTATG AATAAGGAAA  
XUE1.txt TGCATGCGAG TGTATAAATT TGTTTTGACC TTTATGTATG AATAAGGAAA  
Pepino.txt TGCATGCGAG TGTATAAATT TGTTTTGACC TTTATGTATG AATAAGGAAA  
Jin5-508.txt TGCATGCGAG TGTATAAATT TGTTTTGACC TTTATGTATG AATAAGGAAA  
EP6392.txt TGCATGCGAG TGTATAAATT TGTTTTGACC TTTATGTATG AATAAGGAAA

D8.txt TAACTTGCCA CCTTCTTTTC TTTGAGATGG AAACAAAATT TCATTGATGT  
SPD010.txt TAACTTGCCA CCTTCTTTTC TTTGAGATGG AAACAAAATT TCATTGATGT  
DPD010.txt TAACTTGCCA CCTTCTTTTC TTTGAGATGG AAACAAAATT TCATTGATGT  
SPD110.txt TAACTTGCCA CCTTCTTTTC TTTGAGATGG AAACAAAATT TCATTGATGT  
XUE1.txt TAACTTGCCA CCTTCTTTTC TTTGAGATGG AAACAAAATT TCATTGATGT  
Pepino.txt TAACTTGCCA CCTTCTTTTC TTTGAGATGG AAACAAAATT TCATTGATGT

Jin5-508.txt TAACTTGGCA CCTTCTTTTC TTTGAGATGG AAACAAAATT TCATTGATGT  
EP6392.txt TAACTTGGCA CCTTCTTTTC TTTGAGATGG AAACAAAATT TCATTGATGT

D8.txt AACAAAGTTT AAAAAGGCTA GTGGGTTGTA AAAATCGCTT CCAATTATAG  
SPD010.txt AACAAAGTTT AAAAAGGCTA GTGGGTTGTA AAAATCGCTT CCAATTATAG  
DPD010.txt AACAAAGTTT AAAAAGGCTA GTGGGTTGTA AAAATCGCTT CCAATTATAG  
SPD110.txt AACAAAGTTT AAAAAGGCTA GTGGGTTGTA AAAATCGCTT CCAATTATAG  
XUE1.txt AACAAAGTTT AAAAAGGCTA GTGGGTTGTA AAAATCGCTT CCAATTATAG  
Pepino.txt AACAAAGTTT AAAAAGGCTA GTGGGTTGTA AAAATCGCTT CCAATTATAG  
Jin5-508.txt AACAAAGTTT AAAAAGGCTA GTGGGTTGTA AAAATCGCTT CCAATTATAG  
EP6392.txt AACAAAGTTT AAAAAGGCTA GTGGGTTGTA AAAATCGCTT CCAATTATAG

D8.txt AACAAATATC ACAAAGAGAA TGATCAAAAA AGAAAAATAA CCATAGCTTC  
SPD010.txt AACAAATATC ACAAAGAGAA TGATCAAAAA AGAAAAATAA CCATAGCTTC  
DPD010.txt AACAAATATC ACAAAGAGAA TGATCAAAAA AGAAAAATAA CCATAGCTTC  
SPD110.txt AACAAATATC ACAAAGAGAA TGATCAAAAA AGAAAAATAA CCATAGCTTC  
XUE1.txt AACAAATATC ACAAAGAGAA TGATCAAAAA AGAAAAATAA CCATAGCTTC  
Pepino.txt AACAAATATC ACAAAGAGAA TGATCAAAAA AGAAAAATAA CCATAGCTTC  
Jin5-508.txt AACAAATATC ACAAAGAGAA TGATCAAAAA AGAAAAATAA CCATAGCTTC  
EP6392.txt AACAAATATC ACAAAGAGAA TGATCAAAAA AGAAAAATAA CCATAGCTTC

D8.txt AAGTGACTGC TGTGTTCAA ATAAGGTCAA TAAGTGCAGT ACCTCTCCCT  
SPD010.txt AAGTGACTGC TGTGTTCAA ATAAGGTCAA TAAGTGCAGT ACCTCTCCCT  
DPD010.txt AAGTGACTGC TGTGTTCAA ATAAGGTCAA TAAGTGCAGT ACCTCTCCCT  
SPD110.txt AAGTGACTGC TGTGTTCAA ATAAGGTCAA TAAGTGCAGT ACCTCTCCCT  
XUE1.txt AAGTGACTGC TGTGTTCAA ATAAGGTCAA TAAGTGCAGT ACCTCTCCCT  
Pepino.txt AAGTGACTGC TGTGTTCAA ATAAGGTCAA TAAGTGCAGT ACCTCTCCCT  
Jin5-508.txt AAGTGACTGC TGTGTTCAA ATAAGGTCAA TAAGTGCAGT ACCTCTCCCT  
EP6392.txt AAGTGACTGC TGTGTTCAA ATAAGGTCAA TAAGTGCAGT ACCTCTCCCT

D8.txt TTCAATTGAA AGTTTTACTA TTCCTCTCAA GGCAAGTGGT TCAAAGGGAG  
SPD010.txt TTCAATTGAA AGTTTTACTA TTCCTCTCAA GGCAAGTGGT TCAAAGGGAG  
DPD010.txt TTCAATTGAA AGTTTTACTA TTCCTCTCAA GGCAAGTGGT TCAAAGGGAG  
SPD110.txt TTCAATTGAA AGTTTTACTA TTCCTCTCAA GGCAAGTGGT TCAAAGGGAG  
XUE1.txt TTCAATTGAA AGTTTTACTA TTCCTCTCAA GGCAAGTGGT TCAAAGGGAG  
Pepino.txt TTCAATTGAA AGTTTTACTA TTCCTCTCAA GGCAAGTGGT TCAAAGGGAG  
Jin5-508.txt TTCAATTGAA AGTTTTACTA TTCCTCTCAA GGCAAGTGGT TCAAAGGGAG  
EP6392.txt TTCAATTGAA AGTTTTACTA TTCCTCTCAA GGCAAGTGGT TCAAAGGGAG

|              |            |            |            |            |            |
|--------------|------------|------------|------------|------------|------------|
| D8.txt       | CTTCTAGTGA | AGTTCAACCA | TAGAGATTTT | GATTTCCCTT | CACCATAGTA |
| SPD010.txt   | CTTCTAGTGA | AGTTCAACCA | TAGAGATTTT | GATTTCCCTT | CACCATAGTA |
| DPD010.txt   | CTTCTAGTGA | AGTTCAACCA | TAGAGATTTT | GATTTCCCTT | CACCATAGTA |
| SPD110.txt   | CTTCTAGTGA | AGTTCAACCA | TAGAGATTTT | GATTTCCCTT | CACCATAGTA |
| XUE1.txt     | CTTCTAGTGA | AGTTCAACCA | TAGAGATTTT | GATTTCCCTT | CACCATAGTA |
| Pepino.txt   | CTTCTAGTGA | AGTTCAACCA | TAGAGATTTT | GATTTCCCTT | CACCATAGTA |
| Jin5-508.txt | CTTCTAGTGA | AGTTCAACCA | TAGAGATTTT | GATTTCCCTT | CACCATAGTA |
| EP6392.txt   | CTTCTAGTGA | AGTTCAACCA | TAGAGATTTT | GATTTCCCTT | CACCATAGTA |

|              |            |            |            |            |            |
|--------------|------------|------------|------------|------------|------------|
| D8.txt       | TCAAGTATTT | TTCATTGAAA | TGTCTCCCCA | AATACCTTGA | AGTGATTGAT |
| SPD010.txt   | TCAAGTATTT | TTCATTGAAA | TGTCTCCCCA | AATACCTTGA | AGTGATTGAT |
| DPD010.txt   | TCAAGTATTT | TTCATTGAAA | TGTCTCCCCA | AATACCTTGA | AGTGATTGAT |
| SPD110.txt   | TCAAGTATTT | TTCATTGAAA | TGTCTCCCCA | AATACCTTGA | AGTGATTGAT |
| XUE1.txt     | TCAAGTATTT | TTCATTGAAA | TGTCTCCCCA | AATACCTTGA | AGTGATTGAT |
| Pepino.txt   | TCAAGTATTT | TTCATTGAAA | TGTCTCCCCA | AATACCTTGA | AGTGATTGAT |
| Jin5-508.txt | TCAAGTATTT | TTCATTGAAA | TGTCTCCCCA | AATACCTTGA | AGTGATTGAT |
| EP6392.txt   | TCAAGTATTT | TTCATTGAAA | TGTCTCCCCA | AATACCTTGA | AGTGATTGAT |

|              |            |            |            |            |            |
|--------------|------------|------------|------------|------------|------------|
| D8.txt       | GGAATTGTCA | TTGGGCCACC | AATCAAGATG | AGTGGGACAC | CATTTGTCAC |
| SPD010.txt   | GGAATTGTCA | TTGGGCCACC | AATCAAGATG | AGTGGGACAC | CATTTGTCAC |
| DPD010.txt   | GGAATTGTCA | TTGGGCCACC | AATCAAGATG | AGTGGGACAC | CATTTGTCAC |
| SPD110.txt   | GGAATTGTCA | TTGGGCCACC | AATCAAGATG | AGTGGGACAC | CATTTGTCAC |
| XUE1.txt     | GGAATTGTCA | TTGGGCCACC | AATCAAGATG | AGTGGGACAC | CATTTGTCAC |
| Pepino.txt   | GGAATTGTCA | TTGGGCCACC | AATCAAGATG | AGTGGGACAC | CATTTGTCAC |
| Jin5-508.txt | GGAATTGTCA | TTGGGCCACC | AATCAAGATG | AGTGGGACAC | CATTTGTCAC |
| EP6392.txt   | GGAATTGTCA | TTGGGCCACC | AATCAAGATG | AGTGGGACAC | CATTTGTCAC |

|              |            |            |            |            |            |
|--------------|------------|------------|------------|------------|------------|
| D8.txt       | TAATAAGTTT | GCTCCAAATG | GGACCTCATC | TGGCTATGAG | AAACTGATCG |
| SPD010.txt   | TAATAAGTTT | GCTCCAAATG | GGACCTCATC | TGGCTATGAG | AAACTGATCG |
| DPD010.txt   | TAATAAGTTT | GCTCCAAATG | GGACCTCATC | TGGCTATGAG | AAACTGATCG |
| SPD110.txt   | TAATAAGTTT | GCTCCAAATG | GGACCTCATC | TGGCTATGAG | AAACTGATCG |
| XUE1.txt     | TAATAAGTTT | GCTCCAAATG | GGACCTCATC | TGGCTATGAG | AAACTGATCG |
| Pepino.txt   | TAATAAGTTT | GCTCCAAATG | GGACCTCATC | TGGCTATGAG | AAACTGATCG |
| Jin5-508.txt | TAATAAGTTT | GCTCCAAATG | GGACCTCATC | TGGCTATGAG | AAACTGATCG |
| EP6392.txt   | TAATAAGTTT | GCTCCAAATG | GGACCTCATC | TGGCTATGAG | AAACTGATCG |

|            |            |            |            |            |            |
|------------|------------|------------|------------|------------|------------|
| D8.txt     | TTTTTTCCCT | GCAAATTCCC | AAGGTGAATA | TCACCCTTAG | AGATGGGACA |
| SPD010.txt | TTTTTTCCCT | GCAAATTCCC | AAGGTGAATA | TCACCCTTAG | AGATGGGACA |
| DPD010.txt | TTTTTTCCCT | GCAAATTCCC | AAGGTGAATA | TCACCCTTAG | AGATGGGACA |
| SPD110.txt | TTTTTTCCCT | GCAAATTCCC | AAGGTGAATA | TCACCCTTAG | AGATGGGACA |

XUE1.txt TTTTTTCCCT GCAAATTCCC AAGGTGAATA TCACCCTTAG AGATGGGACA  
Pepino.txt TTTTTTCCCT GCAAATTCCC AAGGTGAATA TCACCCTTAG AGATGGGACA  
Jin5-508.txt TTTTTTCCCT GCAAATTCCC AAGGTGAATA TCACCCTTAG AGATGGGACA  
EP6392.txt TTTTTTCCCT GCAAATTCCC AAGGTGAATA TCACCCTTAG AGATGGGACA

D8.txt TGAAATCTTG TCCCAAGTAG CCAAATGAGG GGTGTTGGAA AATAAAAACA  
SPD010.txt TGAAATCTTG TCCCAAGTAG CCAAATGAGG GGTGTTGGAA AATAAAAACA  
DPD010.txt TGAAATCTTG TCCCAAGTAG CCAAATGAGG GGTGTTGGAA AATAAAAACA  
SPD110.txt TGAAATCTTG TCCCAAGTAG CCAAATGAGG GGTGTTGGAA AATAAAAACA  
XUE1.txt TGAAATCTTG TCCCAAGTAG CCAAATGAGG GGTGTTGGAA AATAAAAACA  
Pepino.txt TGAAATCTTG TCCCAAGTAG CCAAATGAGG GGTGTTGGAA AATAAAAACA  
Jin5-508.txt TGAAATCTTG TCCCAAGTAG CCAAATGAGG GGTGTTGGAA AATAAAAACA  
EP6392.txt TGAAATCTTG TCCCAAGTAG CCAAATGAGG GGTGTTGGAA AATAAAAACA

D8.txt TTTTCTTAAC GGGACTTGGA AATTTTTTCG AGCATTTTGA ATAAAGACAT  
SPD010.txt TTTTCTTAAC GGGACTTGGA AATTTTTTCG AGCATTTTGA ATAAAGACAT  
DPD010.txt TTTTCTTAAC GGGACTTGGA AATTTTTTCG AGCATTTTGA ATAAAGACAT  
SPD110.txt TTTTCTTAAC GGGACTTGGA AATTTTTTCG AGCATTTTGA ATAAAGACAT  
XUE1.txt TTTTCTTAAC GGGACTTGGA AATTTTTTCG AGCATTTTGA ATAAAGACAT  
Pepino.txt TTTTCTTAAC GGGACTTGGA AATTTTTTCG AGCATTTTGA ATAAAGACAT  
Jin5-508.txt TTTTCTTAAC GGGACTTGGA AATTTTTTCG AGCATTTTGA ATAAAGACAT  
EP6392.txt TTTTCTTAAC GGGACTTGGA AATTTTTTCG AGCATTTTGA ATAAAGACAT

D8.txt GTATCAAATG AGAGTTTGGT ATTCTCCTTT GGTGTCTCCA CCCTTTAAGC  
SPD010.txt GTATCAAATG AGAGTTTGGT ATTCTCCTTT GGTGTCTCCA CCCTTTAAGC  
DPD010.txt GTATCAAATG AGAGTTTGGT ATTCTCCTTT GGTGTCTCCA CCCTTTAAGC  
SPD110.txt GTATCAAATG AGAGTTTGGT ATTCTCCTTT GGTGTCTCCA CCCTTTAAGC  
XUE1.txt GTATCAAATG AGAGTTTGGT ATTCTCCTTT GGTGTCTCCA CCCTTTAAGC  
Pepino.txt GTATCAAATG AGAGTTTGGT ATTCTCCTTT GGTGTCTCCA CCCTTTAAGC  
Jin5-508.txt GTATCAAATG AGAGTTTGGT ATTCTCCTTT GGTGTCTCCA CCCTTTAAGC  
EP6392.txt GTATCAAATG AGAGTTTGGT ATTCTCCTTT GGTGTCTCCA CCCTTTAAGC

D8.txt TTCTAACTTG ATTTAGGGTC TCAAAAAGAC TGCAGTTTGG GGTGACCAAG  
SPD010.txt TTCTAACTTG ATTTAGGGTC TCAAAAAGAC TGCAGTTTGG GGTGACCAAG  
DPD010.txt TTCTAACTTG ATTTAGGGTC TCAAAAAGAC TGCAGTTTGG GGTGACCAAG  
SPD110.txt TTCTAACTTG ATTTAGGGTC TCAAAAAGAC TGCAGTTTGG GGTGACCAAG  
XUE1.txt TTCTAACTTG ATTTAGGGTC TCAAAAAGAC TGCAGTTTGG GGTGACCAAG  
Pepino.txt TTCTAACTTG ATTTAGGGTC TCAAAAAGAC TGCAGTTTGG GGTGACCAAG  
Jin5-508.txt TTCTAACTTG ATTTAGGGTC TCAAAAAGAC TGCAGTTTGG GGTGACCAAG  
EP6392.txt TTCTAACTTG ATTTAGGGTC TCAAAAAGAC TGCAGTTTGG GGTGACCAAG

D8.txt ACGGAGGAGG CCAAGGTTGG AGGATGGTCA TTGCTCAGTC ACACGTCTGC  
SPD010.txt ACGGAGGAGG CCAAGGTTGG AGGATGGTCA TTGCTCAGTC ACACGTCTGC  
DPD010.txt ACGGAGGAGG CCAAGGTTGG AGGATGGTCA TTGCTCAGTC ACACGTCTGC  
SPD110.txt ACGGAGGAGG CCAAGGTTGG AGGATGGTCA TTGCTCAGTC ACACGTCTGC  
XUE1.txt ACGGAGGAGG CCAAGGTTGG AGGATGGTCA TTGCTCAGTC ACACGTCTGC  
Pepino.txt ACGGAGGAGG CCAAGGTTGG AGGATGGTCA TTGCTCAGTC ACACGTCTGC  
Jin5-508.txt ACGGAGGAGG CCAAGGTTGG AGGATGGTCA TTGCTCAGTC ACACGTCTGC  
EP6392.txt ACGGAGGAGG CCAAGGTTGG AGGATGGTCA TTGCTCAGTC ACACGTCTGC

D8.txt AAATGTAGGC AGCAGATTGT GATGGAATTA CTAACATTGA TGCAACTTGC  
SPD010.txt AAATGTAGGC AGCAGATTGT GATGGAATTA CTAACATTGA TGCAACTTGC  
DPD010.txt AAATGTAGGC AGCAGATTGT GATGGAATTA CTAACATTGA TGCAACTTGC  
SPD110.txt AAATGTAGGC AGCAGATTGT GATGGAATTA CTAACATTGA TGCAACTTGC  
XUE1.txt AAATGTAGGC AGCAGATTGT GATGGAATTA CTAACATTGA TGCAACTTGC  
Pepino.txt AAATGTAGGC AGCAGATTGT GATGGAATTA CTAACATTGA TGCAACTTGC  
Jin5-508.txt AAATGTAGGC AGCAGATTGT GATGGAATTA CTAACATTGA TGCAACTTGC  
EP6392.txt AAATGTAGGC AGCAGATTGT GATGGAATTA CTAACATTGA TGCAACTTGC

D8.txt AAAGTAGCTC GGCTTTGCTC CAATTAACAA TGGGAGTAGA GGAAGCTTAA  
SPD010.txt AAAGTAGCTC GGCTTTGCTC CAATTAACAA TGGGAGTAGA GGAAGCTTAA  
DPD010.txt AAAGTAGCTC GGCTTTGCTC CAATTAACAA TGGGAGTAGA GGAAGCTTAA  
SPD110.txt AAAGTAGCTC GGCTTTGCTC CAATTAACAA TGGGAGTAGA GGAAGCTTAA  
XUE1.txt AAAGTAGCTC GGCTTTGCTC CAATTAACAA TGGGAGTAGA GGAAGCTTAA  
Pepino.txt AAAGTAGCTC GGCTTTGCTC CAATTAACAA TGGGAGTAGA GGAAGCTTAA  
Jin5-508.txt AAAGTAGCTC GGCTTTGCTC CAATTAACAA TGGGAGTAGA GGAAGCTTAA  
EP6392.txt AAAGTAGCTC GGCTTTGCTC CAATTAACAA TGGGAGTAGA GGAAGCTTAA

D8.txt ATATTCTGAT GACTAGGAAG AGAATAAGGT GGTGCCTGTT TCTGGACTTC  
SPD010.txt ATATTCTGAT GACTAGGAAG AGAATAAGGT GGTGCCTGTT TCTGGACTTC  
DPD010.txt ATATTCTGAT GACTAGGAAG AGAATAAGGT GGTGCCTGTT TCTGGACTTC  
SPD110.txt ATATTCTGAT GACTAGGAAG AGAATAAGGT GGTGCCTGTT TCTGGACTTC  
XUE1.txt ATATTCTGAT GACTAGGAAG AGAATAAGGT GGTGCCTGTT TCTGGACTTC  
Pepino.txt ATATTCTGAT GACTAGGAAG AGAATAAGGT GGTGCCTGTT TCTGGACTTC  
Jin5-508.txt ATATTCTGAT GACTAGGAAG AGAATAAGGT GGTGCCTGTT TCTGGACTTC  
EP6392.txt ATATTCTGAT GACTAGGAAG AGAATAAGGT GGTGCCTGTT TCTGGACTTC

D8.txt TCTGGAGGAG CCTGCTAAGA GAATCTATCA CCTCAAGTGA AAATAGTGCA  
SPD010.txt TCTGGAGGAG CCTGCTAAGA GAATCTATCA CCTCAAGTGA AAATAGTGCA



DPD010.txt TCTGGAGGAG CCTGCTAAGA GAATCTATCA CCTCAAGTGA AAATAGTGCA  
SPD110.txt TCTGGAGGAG CCTGCTAAGA GAATCTATCA CCTCAAGTGA AAATAGTGCA  
XUE1.txt TCTGGAGGAG CCTGCTAAGA GAATCTATCA CCTCAAGTGA AAATAGTGCA  
Pepino.txt TCTGGAGGAG CCTGCTAAGA GAATCTATCA CCTCAAGTGA AAATAGTGCA  
Jin5-508.txt TCTGGAGGAG CCTGCTAAGA GAATCTATCA CCTCAAGTGA AAATAGTGCA  
EP6392.txt TCTGGAGGAG CCTGCTAAGA GAATCTATCA CCTCAAGTGA AAATAGTGCA

D8.txt TCCGTAAGAA GACATTATTT CCTTCCTTTT CTGTATAGGA GATGTTATTT  
SPD010.txt TCCGTAAGAA GACATTATTT CCTTCCTTTT CTGTATAGGA GATGTTATTT  
DPD010.txt TCCGTAAGAA GACATTATTT CCTTCCTTTT CTGTATAGGA GATGTTATTT  
SPD110.txt TCCGTAAGAA GACATTATTT CCTTCCTTTT CTGTATAGGA GATGTTATTT  
XUE1.txt TCCGTAAGAA GACATTATTT CCTTCCTTTT CTGTATAGGA GATGTTATTT  
Pepino.txt TCCGTAAGAA GACATTATTT CCTTCCTTTT CTGTATAGGA GATGTTATTT  
Jin5-508.txt TCCGTAAGAA GACATTATTT CCTTCCTTTT CTGTATAGGA GATGTTATTT  
EP6392.txt TCCGTAAGAA GACATTATTT CCTTCCTTTT CTGTATAGGA GATGTTATTT

D8.txt ATCATCTTTG TGGGATATGT AAATATTAAA CCACCAATTC ATCCAAAAGC  
SPD010.txt ATCATCTTTG TGGGATATGT AAATATTAAA CCACCAATTC ATCCAAAAGC  
DPD010.txt ATCATCTTTG TGGGATATGT AAATATTAAA CCACCAATTC ATCCAAAAGC  
SPD110.txt ATCATCTTTG TGGGATATGT AAATATTAAA CCACCAATTC ATCCAAAAGC  
XUE1.txt ATCATCTTTG TGGGATATGT AAATATTAAA CCACCAATTC ATCCAAAAGC  
Pepino.txt ATCATCTTTG TGGGATATGT AAATATTAAA CCACCAATTC ATCCAAAAGC  
Jin5-508.txt ATCATCTTTG TGGGATATGT AAATATTAAA CCACCAATTC ATCCAAAAGC  
EP6392.txt ATCATCTTTG TGGGATATGT AAATATTAAA CCACCAATTC ATCCAAAAGC

D8.txt TTAAGCTGGT GGTGAAGGC AAATTTAATT ATATATCACC AACACTCCCC  
SPD010.txt TTAAGCTGGT GGTGAAGGC AAATTTAATT ATATATCACC AACACTCCCC  
DPD010.txt TTAAGCTGGT GGTGAAGGC AAATTTAATT ATATATCACC AACACTCCCC  
SPD110.txt TTAAGCTGGT GGTGAAGGC AAATTTAATT ATATATCACC AACACTCCCC  
XUE1.txt TTAAGCTGGT GGTGAAGGC AAATTTAATT ATATATCACC AACACTCCCC  
Pepino.txt TTAAGCTGGT GGTGAAGGC AAATTTAATT ATATATCACC AACACTCCCC  
Jin5-508.txt TTAAGCTGGT GGTGAAGGC AAATTTAATT ATATATCACC AACACTCCCC  
EP6392.txt TTAAGCTGGT GGTGAAGGC AAATTTAATT ATATATCACC AACACTCCCC

D8.txt CTCACTTGTG GGCTTGAAAT ATTTGAAAGG CCTAACAAGT GGAATCAATT  
SPD010.txt CTCACTTGTG GGCTTGAAAT ATTTGAAAGG CCTAACAAGT GGAATCAATT  
DPD010.txt CTCACTTGTG GGCTTGAAAT ATTTGAAAGG CCTAACAAGT GGAATCAATT  
SPD110.txt CTCACTTGTG GGCTTGAAAT ATTTGAAAGG CCTAACAAGT GGAATCAATT  
XUE1.txt CTCACTTGTG GGCTTGAAAT ATTTGAAAGG CCTAACAAGT GGAATCAATT  
Pepino.txt CTCACTTGTG GGCTTGAAAT ATTTGAAAGG CCTAACAAGT GGAATCAATT

Jin5-508.txt CTCACCTGTG GGCTTGAAAT ATTTGAAAGG CCTAACAAGT GGAATCAATT  
EP6392.txt CTCACCTGTG GGCTTGAAAT ATTTGAAAGG CCTAACAAGT GGAATCAATT

D8.txt TTACCTCACT TTTGGGTTTT AAATATTTGC AAGGCCCAAG TGGAAATCAA  
SPD010.txt TTACCTCACT TTTGGGTTTT AAATATTTGC AAGGCCCAAG TGGAAATCAA  
DPD010.txt TTACCTCACT TTTGGGTTTT AAATATTTGC AAGGCCCAAG TGGAAATCAA  
SPD110.txt TTACCTCACT TTTGGGTTTT AAATATTTGC AAGGCCCAAG TGGAAATCAA  
XUE1.txt TTACCTCACT TTTGGGTTTT AAATATTTGC AAGGCCCAAG TGGAAATCAA  
Pepino.txt TTACCTCACT TTTGGGTTTT AAATATTTGC AAGGCCCAAG TGGAAATCAA  
Jin5-508.txt TTACCTCACT TTTGGGTTTT AAATATTTGC AAGGCCCAAG TGGAAATCAA  
EP6392.txt TTACCTCACT TTTGGGTTTT AAATATTTGC AAGGCCCAAG TGGAAATCAA

D8.txt TTTTAATTTG GGAGGAAACN NNNNNNNNNN NNNNNNNNNN NNNNNNNNNN  
SPD010.txt TTTTAATTTG GGAGGAAACN NNNNNNNNNN NNNNNNNNNN NNNNNNNNNN  
DPD010.txt TTTTAATTTG GGAGGAAACN NNNNNNNNNN NNNNNNNNNN NNNNNNNNNN  
SPD110.txt TTTTAATTTG GGAGGAAACN NNNNNNNNNN NNNNNNNNNN NNNNNNNNNN  
XUE1.txt TTTTAATTTG GGAGGAAACN NNNNNNNNNN NNNNNNNNNN NNNNNNNNNN  
Pepino.txt TTTTAATTTG GGAGGAAACN NNNNNNNNNN NNNNNNNNNN NNNNNNNNNN  
Jin5-508.txt TTTTAATTTG GGAGGAAACN NNNNNNNNNN NNNNNNNNNN NNNNNNNNNN  
EP6392.txt TTTTAATTTG GGAGGAAACN NNNNNNNNNN NNNNNNNNNN NNNNNNNNNN

D8.txt NNNNNNNNNN NNNNNNNNNN NNNNNNNNNN NNNNNNNNNN NTTGAAAATT  
SPD010.txt NNNNNNNNNN NNNNNNNNNN NNNNNNNNNN NNNNNNNNNN NTTGAAAATT  
DPD010.txt NNNNNNNNNN NNNNNNNNNN NNNNNNNNNN NNNNNNNNNN NTTGAAAATT  
SPD110.txt NNNNNNNNNN NNNNNNNNNN NNNNNNNNNN NNNNNNNNNN NTTGAAAATT  
XUE1.txt NNNNNNNNNN NNNNNNNNNN NNNNNNNNNN NNNNNNNNNN NTTGAAAATT  
Pepino.txt NNNNNNNNNN NNNNNNNNNN NNNNNNNNNN NNNNNNNNNN NTTGAAAATT  
Jin5-508.txt NNNNNNNNNN NNNNNNNNNN NNNNNNNNNN NNNNNNNNNN NTTGAAAATT  
EP6392.txt NNNNNNNNNN NNNNNNNNNN NNNNNNNNNN NNNNNNNNNN NTTGAAAATT

D8.txt CAAGTGATAC TTACTATTGA AAAGAGAGAC AACGAGTTCA CACCAATTTA  
SPD010.txt CAAGTGATAC TTACTATTGA AAAGAGAGAC AACGAGTTCA CACCAATTTA  
DPD010.txt CAAGTGATAC TTACTATTGA AAAGAGAGAC AACGAGTTCA CACCAATTTA  
SPD110.txt CAAGTGATAC TTACTATTGA AAAGAGAGAC AACGAGTTCA CACCAATTTA  
XUE1.txt CAAGTGATAC TTACTATTGA AAAGAGAGAC AACGAGTTCA CACCAATTTA  
Pepino.txt CAAGTGATAC TTACTATTGA AAAGAGAGAC AACGAGTTCA CACCAATTTA  
Jin5-508.txt CAAGTGATAC TTACTATTGA AAAGAGAGAC AACGAGTTCA CACCAATTTA  
EP6392.txt CAAGTGATAC TTACTATTGA AAAGAGAGAC AACGAGTTCA CACCAATTTA

|              |            |            |            |            |            |
|--------------|------------|------------|------------|------------|------------|
| D8.txt       | CGTGGAAACC | CGAGTACCGG | GAGAAAAACC | ACGATTGTTT | GTTGTTATTA |
| SPD010.txt   | CGTGGAAACC | CGAGTACCGG | GAGAAAAACC | ACGATTGTTT | GTTGTTATTA |
| DPD010.txt   | CGTGGAAACC | CGAGTACCGG | GAGAAAAACC | ACGATTGTTT | GTTGTTATTA |
| SPD110.txt   | CGTGGAAACC | CGAGTACCGG | GAGAAAAACC | ACGATTGTTT | GTTGTTATTA |
| XUE1.txt     | CGTGGAAACC | CGAGTACCGG | GAGAAAAACC | ACGATTGTTT | GTTGTTATTA |
| Pepino.txt   | CGTGGAAACC | CGAGTACCGG | GAGAAAAACC | ACGATTGTTT | GTTGTTATTA |
| Jin5-508.txt | CGTGGAAACC | CGAGTACCGG | GAGAAAAACC | ACGATTGTTT | GTTGTTATTA |
| EP6392.txt   | CGTGGAAACC | CGAGTACCGG | GAGAAAAACC | ACGATTGTTT | GTTGTTATTA |

|              |            |            |            |            |            |
|--------------|------------|------------|------------|------------|------------|
| D8.txt       | TTTTCTAATG | AATAAAGCAA | TAGGTACAAG | GGAGAATAAA | TATAGTATAC |
| SPD010.txt   | TTTTCTAATG | AATAAAGCAA | TAGGTACAAG | GGAGAATAAA | TATAGTATAC |
| DPD010.txt   | TTTTCTAATG | AATAAAGCAA | TAGGTACAAG | GGAGAATAAA | TATAGTATAC |
| SPD110.txt   | TTTTCTAATG | AATAAAGCAA | TAGGTACAAG | GGAGAATAAA | TATAGTATAC |
| XUE1.txt     | TTTTCTAATG | AATAAAGCAA | TAGGTACAAG | GGAGAATAAA | TATAGTATAC |
| Pepino.txt   | TTTTCTAATG | AATAAAGCAA | TAGGTACAAG | GGAGAATAAA | TATAGTATAC |
| Jin5-508.txt | TTTTCTAATG | AATAAAGCAA | TAGGTACAAG | GGAGAATAAA | TATAGTATAC |
| EP6392.txt   | TTTTCTAATG | AATAAAGCAA | TAGGTACAAG | GGAGAATAAA | TATAGTATAC |

|              |            |            |            |            |            |
|--------------|------------|------------|------------|------------|------------|
| D8.txt       | AATGGAATAA | AAAAGTAAAA | GATTTAGGAA | AATAAGGAAA | ACATTCTCAT |
| SPD010.txt   | AATGGAATAA | AAAAGTAAAA | GATTTAGGAA | AATAAGGAAA | ACATTCTCAT |
| DPD010.txt   | AATGGAATAA | AAAAGTAAAA | GATTTAGGAA | AATAAGGAAA | ACATTCTCAT |
| SPD110.txt   | AATGGAATAA | AAAAGTAAAA | GATTTAGGAA | AATAAGGAAA | ACATTCTCAT |
| XUE1.txt     | AATGGAATAA | AAAAGTAAAA | GATTTAGGAA | AATAAGGAAA | ACATTCTCAT |
| Pepino.txt   | AATGGAATAA | AAAAGTAAAA | GATTTAGGAA | AATAAGGAAA | ACATTCTCAT |
| Jin5-508.txt | AATGGAATAA | AAAAGTAAAA | GATTTAGGAA | AATAAGGAAA | ACATTCTCAT |
| EP6392.txt   | AATGGAATAA | AAAAGTAAAA | GATTTAGGAA | AATAAGGAAA | ACATTCTCAT |

|              |            |            |            |            |            |
|--------------|------------|------------|------------|------------|------------|
| D8.txt       | AATCTTTCCA | TAATTATTCT | AGGATTCTAA | CAAGGAAAAT | GCCTAGAAAA |
| SPD010.txt   | AATCTTTCCA | TAATTATTCT | AGGATTCTAA | CAAGGAAAAT | GCCTAGAAAA |
| DPD010.txt   | AATCTTTCCA | TAATTATTCT | AGGATTCTAA | CAAGGAAAAT | GCCTAGAAAA |
| SPD110.txt   | AATCTTTCCA | TAATTATTCT | AGGATTCTAA | CAAGGAAAAT | GCCTAGAAAA |
| XUE1.txt     | AATCTTTCCA | TAATTATTCT | AGGATTCTAA | CAAGGAAAAT | GCCTAGAAAA |
| Pepino.txt   | AATCTTTCCA | TAATTATTCT | AGGATTCTAA | CAAGGAAAAT | GCCTAGAAAA |
| Jin5-508.txt | AATCTTTCCA | TAATTATTCT | AGGATTCTAA | CAAGGAAAAT | GCCTAGAAAA |
| EP6392.txt   | AATCTTTCCA | TAATTATTCT | AGGATTCTAA | CAAGGAAAAT | GCCTAGAAAA |

|            |            |            |            |            |            |
|------------|------------|------------|------------|------------|------------|
| D8.txt     | AAGGAAAGAA | TTCCAACAGT | AAATACAGAG | TTTTTTGGGA | AGGGAAGAAA |
| SPD010.txt | AAGGAAAGAA | TTCCAACAGT | AAATACAGAG | TTTTTTGGGA | AGGGAAGAAA |
| DPD010.txt | AAGGAAAGAA | TTCCAACAGT | AAATACAGAG | TTTTTTGGGA | AGGGAAGAAA |
| SPD110.txt | AAGGAAAGAA | TTCCAACAGT | AAATACAGAG | TTTTTTGGGA | AGGGAAGAAA |

XUE1.txt AAGGAAAGAA TTCCAACAGT AAATACAGAG TTTTTTGGGA AGGGAAGAAA  
Pepino.txt AAGGAAAGAA TTCCAACAGT AAATACAGAG TTTTTTGGGA AGGGAAGAAA  
Jin5-508.txt AAGGAAAGAA TTCCAACAGT AAATACAGAG TTTTTTGGGA AGGGAAGAAA  
EP6392.txt AAGGAAAGAA TTCCAACAGT AAATACAGAG TTTTTTGGGA AGGGAAGAAA

D8.txt GGCTAGCGCT GTCTCACGCC CTCAAACATT AATGGTTAGT TCTTGATGGA  
SPD010.txt GGCTAGCGCT GTCTCACGCC CTCAAACATT AATGGTTAGT TCTTGATGGA  
DPD010.txt GGCTAGCGCT GTCTCACGCC CTCAAACATT AATGGTTAGT TCTTGATGGA  
SPD110.txt GGCTAGCGCT GTCTCACGCC CTCAAACATT AATGGTTAGT TCTTGATGGA  
XUE1.txt GGCTAGCGCT GTCTCACGCC CTCAAACATT AATGGTTAGT TCTTGATGGA  
Pepino.txt GGCTAGCGCT GTCTCACGCC CTCAAACATT AATGGTTAGT TCTTGATGGA  
Jin5-508.txt GGCTAGCGCT GTCTCACGCC CTCAAACATT AATGGTTAGT TCTTGATGGA  
EP6392.txt GGCTAGCGCT GTCTCACGCC CTCAAACATT AATGGTTAGT TCTTGATGGA

D8.txt GGAAAAAGAG CTTTATGTTT AAATAGAAAT TTTTCCAAT TTTCTATTGA  
SPD010.txt GGAAAAAGAG CTTTATGTTT AAATAGAAAT TTTTCCAAT TTTCTATTGA  
DPD010.txt GGAAAAAGAG CTTTATGTTT AAATAGAAAT TTTTCCAAT TTTCTATTGA  
SPD110.txt GGAAAAAGAG CTTTATGTTT AAATAGAAAT TTTTCCAAT TTTCTATTGA  
XUE1.txt GGAAAAAGAG CTTTATGTTT AAATAGAAAT TTTTCCAAT TTTCTATTGA  
Pepino.txt GGAAAAAGAG CTTTATGTTT AAATAGAAAT TTTTCCAAT TTTCTATTGA  
Jin5-508.txt GGAAAAAGAG CTTTATGTTT AAATAGAAAT TTTTCCAAT TTTCTATTGA  
EP6392.txt GGAAAAAGAG CTTTATGTTT AAATAGAAAT TTTTCCAAT TTTCTATTGA

D8.txt ATTTTTCTGG AAACCAGGAA ATAGGAGTAT AAGGAAAATT CAGGTGATAC  
SPD010.txt ATTTTTCTGG AAACCAGGAA ATAGGAGTAT AAGGAAAATT CAGGTGATAC  
DPD010.txt ATTTTTCTGG AAACCAGGAA ATAGGAGTAT AAGGAAAATT CAGGTGATAC  
SPD110.txt ATTTTTCTGG AAACCAGGAA ATAGGAGTAT AAGGAAAATT CAGGTGATAC  
XUE1.txt ATTTTTCTGG AAACCAGGAA ATAGGAGTAT AAGGAAAATT CAGGTGATAC  
Pepino.txt ATTTTTCTGG AAACCAGGAA ATAGGAGTAT AAGGAAAATT CAGGTGATAC  
Jin5-508.txt ATTTTTCTGG AAACCAGGAA ATAGGAGTAT AAGGAAAATT CAGGTGATAC  
EP6392.txt ATTTTTCTGG AAACCAGGAA ATAGGAGTAT AAGGAAAATT CAGGTGATAC

D8.txt TCTACAAGTA GTGAAGCAGA GTTGGGAGTA TCATATGGAA AATAATAGAT  
SPD010.txt TCTACAAGTA GTGAAGCAGA GTTGGGAGTA TCATATGGAA AATAATAGAT  
DPD010.txt TCTACAAGTA GTGAAGCAGA GTTGGGAGTA TCATATGGAA AATAATAGAT  
SPD110.txt TCTACAAGTA GTGAAGCAGA GTTGGGAGTA TCATATGGAA AATAATAGAT  
XUE1.txt TCTACAAGTA GTGAAGCAGA GTTGGGAGTA TCATATGGAA AATAATAGAT  
Pepino.txt TCTACAAGTA GTGAAGCAGA GTTGGGAGTA TCATATGGAA AATAATAGAT  
Jin5-508.txt TCTACAAGTA GTGAAGCAGA GTTGGGAGTA TCATATGGAA AATAATAGAT  
EP6392.txt TCTACAAGTA GTGAAGCAGA GTTGGGAGTA TCATATGGAA AATAATAGAT

D8.txt ATTGAGATCA ACCCCAAGAC AGATAATGAT ATTGGTATGA ACAATGGCTC  
SPD010.txt ATTGAGATCA ACCCCAAGAC AGATAATGAT ATTGGTATGA ACAATGGCTC  
DPD010.txt ATTGAGATCA ACCCCAAGAC AGATAATGAT ATTGGTATGA ACAATGGCTC  
SPD110.txt ATTGAGATCA ACCCCAAGAC AGATAATGAT ATTGGTATGA ACAATGGCTC  
XUE1.txt ATTGAGATCA ACCCCAAGAC AGATAATGAT ATTGGTATGA ACAATGGCTC  
Pepino.txt ATTGAGATCA ACCCCAAGAC AGATAATGAT ATTGGTATGA ACAATGGCTC  
Jin5-508.txt ATTGAGATCA ACCCCAAGAC AGATAATGAT ATTGGTATGA ACAATGGCTC  
EP6392.txt ATTGAGATCA ACCCCAAGAC AGATAATGAT ATTGGTATGA ACAATGGCTC

D8.txt AGATACAAAG GAAGAAAGTC GTAGGAGATT TAACCTAAAA AAGAGTTCCA  
SPD010.txt AGATACAAAG GAAGAAAGTC GTAGGAGATT TAACCTAAAA AAGAGTTCCA  
DPD010.txt AGATACAAAG GAAGAAAGTC GTAGGAGATT TAACCTAAAA AAGAGTTCCA  
SPD110.txt AGATACAAAG GAAGAAAGTC GTAGGAGATT TAACCTAAAA AAGAGTTCCA  
XUE1.txt AGATACAAAG GAAGAAAGTC GTAGGAGATT TAACCTAAAA AAGAGTTCCA  
Pepino.txt AGATACAAAG GAAGAAAGTC GTAGGAGATT TAACCTAAAA AAGAGTTCCA  
Jin5-508.txt AGATACAAAG GAAGAAAGTC GTAGGAGATT TAACCTAAAA AAGAGTTCCA  
EP6392.txt AGATACAAAG GAAGAAAGTC GTAGGAGATT TAACCTAAAA AAGAGTTCCA

D8.txt TCATGCGAGG TTGTTTATCA TAGTAATTAA GGTGGCTACT CTGTCTCACA  
SPD010.txt TCATGCGAGG TTGTTTATCA TAGTAATTAA GGTGGCTACT CTGTCTCACA  
DPD010.txt TCATGCGAGG TTGTTTATCA TAGTAATTAA GGTGGCTACT CTGTCTCACA  
SPD110.txt TCATGCGAGG TTGTTTATCA TAGTAATTAA GGTGGCTACT CTGTCTCACA  
XUE1.txt TCATGCGAGG TTGTTTATCA TAGTAATTAA GGTGGCTACT CTGTCTCACA  
Pepino.txt TCATGCGAGG TTGTTTATCA TAGTAATTAA GGTGGCTACT CTGTCTCACA  
Jin5-508.txt TCATGCGAGG TTGTTTATCA TAGTAATTAA GGTGGCTACT CTGTCTCACA  
EP6392.txt TCATGCGAGG TTGTTTATCA TAGTAATTAA GGTGGCTACT CTGTCTCACA

D8.txt TGTTCTAGCC CTTCCTTTGT AATTAAC TTT ATGATTTCTA CAGTCTTGAC  
SPD010.txt TGTTCTAGCC CTTCCTTTGT AATTAAC TTT ATGATTTCTA CAGTCTTGAC  
DPD010.txt TGTTCTAGCC CTTCCTTTGT AATTAAC TTT ATGATTTCTA CAGTCTTGAC  
SPD110.txt TGTTCTAGCC CTTCCTTTGT AATTAAC TTT ATGATTTCTA CAGTCTTGAC  
XUE1.txt TGTTCTAGCC CTTCCTTTGT AATTAAC TTT ATGATTTCTA CAGTCTTGAC  
Pepino.txt TGTTCTAGCC CTTCCTTTGT AATTAAC TTT ATGATTTCTA CAGTCTTGAC  
Jin5-508.txt TGTTCTAGCC CTTCCTTTGT AATTAAC TTT ATGATTTCTA CAGTCTTGAC  
EP6392.txt TGTTCTAGCC CTTCCTTTGT AATTAAC TTT ATGATTTCTA CAGTCTTGAC

D8.txt TTCTGAGCAC TAAAGCAGAA AAATGACCAA ATTATAGTTT CTTAAGTAAC  
SPD010.txt TTCTGAGCAC TAAAGCAGAA AAATGACCAA ATTATAGTTT CTTAAGTAAC

DPD010.txt TTCTGAGCAC TAAAGCAGAA AAATGACCAA ATTATAGTTT CTTAAGTAAC  
SPD110.txt TTCTGAGCAC TAAAGCAGAA AAATGACCAA ATTATAGTTT CTTAAGTAAC  
XUE1.txt TTCTGAGCAC TAAAGCAGAA AAATGACCAA ATTATAGTTT CTTAAGTAAC  
Pepino.txt TTCTGAGCAC TAAAGCAGAA AAATGACCAA ATTATAGTTT CTTAAGTAAC  
Jin5-508.txt TTCTGAGCAC TAAAGCAGAA AAATGACCAA ATTATAGTTT CTTAAGTAAC  
EP6392.txt TTCTGAGCAC TAAAGCAGAA AAATGACCAA ATTATAGTTT CTTAAGTAAC

D8.txt CTAAACCTAA ATGTGTTTCG AAATTTGAAG TATTTTTTCT TTTTTGGTCT  
SPD010.txt CTAAACCTAA ATGTGTTTCG AAATTTGAAG TATTTTTTCT TTTTTGGTCT  
DPD010.txt CTAAACCTAA ATGTGTTTCG AAATTTGAAG TATTTTTTCT TTTTTGGTCT  
SPD110.txt CTAAACCTAA ATGTGTTTCG AAATTTGAAG TATTTTTTCT TTTTTGGTCT  
XUE1.txt CTAAACCTAA ATGTGTTTCG AAATTTGAAG TATTTTTTCT TTTTTGGTCT  
Pepino.txt CTAAACCTAA ATGTGTTTCG AAATTTGAAG TATTTTTTCT TTTTTGGTCT  
Jin5-508.txt CTAAACCTAA ATGTGTTTCG AAATTTGAAG TATTTTTTCT TTTTTGGTCT  
EP6392.txt CTAAACCTAA ATGTGTTTCG AAATTTGAAG TATTTTTTCT TTTTTGGTCT

D8.txt AATATTTTAA AAAAAGTTTG CAGGGTTAAG TTTTGGAGTT GGTGCAATGA  
SPD010.txt AATATTTTAA AAAAAGTTTG CAGGGTTAAG TTTTGGAGTT GGTGCAATGA  
DPD010.txt AATATTTTAA AAAAAGTTTG CAGGGTTAAG TTTTGGAGTT GGTGCAATGA  
SPD110.txt AATATTTTAA AAAAAGTTTG CAGGGTTAAG TTTTGGAGTT GGTGCAATGA  
XUE1.txt AATATTTTAA AAAAAGTTTG CAGGGTTAAG TTTTGGAGTT GGTGCAATGA  
Pepino.txt AATATTTTAA AAAAAGTTTG CAGGGTTAAG TTTTGGAGTT GGTGCAATGA  
Jin5-508.txt AATATTTTAA AAAAAGTTTG CAGGGTTAAG TTTTGGAGTT GGTGCAATGA  
EP6392.txt AATATTTTAA AAAAAGTTTG CAGGGTTAAG TTTTGGAGTT GGTGCAATGA

D8.txt CAACTTTGGT CGGAACCCTA CTTTTTGATG AGCTAATGCA AGCAAAAGAG  
SPD010.txt CAACTTTGGT CGGAACCCTA CTTTTTGATG AGCTAATGCA AGCAAAAGAG  
DPD010.txt CAACTTTGGT CGGAACCCTA CTTTTTGATG AGCTAATGCA AGCAAAAGAG  
SPD110.txt CAACTTTGGT CGGAACCCTA CTTTTTGATG AGCTAATGCA AGCAAAAGAG  
XUE1.txt CAACTTTGGT CGGAACCCTA CTTTTTGATG AGCTAATGCA AGCAAAAGAG  
Pepino.txt CAACTTTGGT CGGAACCCTA CTTTTTGATG AGCTAATGCA AGCAAAAGAG  
Jin5-508.txt CAACTTTGGT CGGAACCCTA CTTTTTGATG AGCTAATGCA AGCAAAAGAG  
EP6392.txt CAACTTTGGT CGGAACCCTA CTTTTTGATG AGCTAATGCA AGCAAAAGAG

D8.txt GTTCAGTTCT CACAAACATT CTCGGTCATT ATTTATATGT TAAAACACCT  
SPD010.txt GTTCAGTTCT CACAAACATT CTCGGTCATT ATTTATATGT TAAAACACCT  
DPD010.txt GTTCAGTTCT CACAAACATT CTCGGTCATT ATTTATATGT TAAAACACCT  
SPD110.txt GTTCAGTTCT CACAAACATT CTCGGTCATT ATTTATATGT TAAAACACCT  
XUE1.txt GTTCAGTTCT CACAAACATT CTCGGTCATT ATTTATATGT TAAAACACCT  
Pepino.txt GTTCAGTTCT CACAAACATT CTCGGTCATT ATTTATATGT TAAAACACCT

Jin5-508.txt GTTCAGTTCT CACAAACATT CTCGGTCATT ATTTATATGT TAAAACACCT  
EP6392.txt GTTCAGTTCT CACAAACATT CTCGGTCATT ATTTATATGT TAAAACACCT

D8.txt TCTAGTGGCA AATTATAGTT TCTATTCAAT ACGTTGTTGG AAAGTAATCT  
SPD010.txt TCTAGTGGCA AATTATAGTT TCTATTCAAT ACGTTGTTGG AAAGTAATCT  
DPD010.txt TCTAGTGGCA AATTATAGTT TCTATTCAAT ACGTTGTTGG AAAGTAATCT  
SPD110.txt TCTAGTGGCA AATTATAGTT TCTATTCAAT ACGTTGTTGG AAAGTAATCT  
XUE1.txt TCTAGTGGCA AATTATAGTT TCTATTCAAT ACGTTGTTGG AAAGTAATCT  
Pepino.txt TCTAGTGGCA AATTATAGTT TCTATTCAAT ACGTTGTTGG AAAGTAATCT  
Jin5-508.txt TCTAGTGGCA AATTATAGTT TCTATTCAAT ACGTTGTTGG AAAGTAATCT  
EP6392.txt TCTAGTGGCA AATTATAGTT TCTATTCAAT ACGTTGTTGG AAAGTAATCT

D8.txt CACTACATGT TCTTCATATT TGCTGAGGTT CATGAAAGTA TGGATAAATG  
SPD010.txt CACTACATGT TCTTCATATT TGCTGAGGTT CATGAAAGTA TGGATAAATG  
DPD010.txt CACTACATGT TCTTCATATT TGCTGAGGTT CATGAAAGTA TGGATAAATG  
SPD110.txt CACTACATGT TCTTCATATT TGCTGAGGTT CATGAAAGTA TGGATAAATG  
XUE1.txt CACTACATGT TCTTCATATT TGCTGAGGTT CATGAAAGTA TGGATAAATG  
Pepino.txt CACTACATGT TCTTCATATT TGCTGAGGTT CATGAAAGTA TGGATAAATG  
Jin5-508.txt CACTACATGT TCTTCATATT TGCTGAGGTT CATGAAAGTA TGGATAAATG  
EP6392.txt CACTACATGT TCTTCATATT TGCTGAGGTT CATGAAAGTA TGGATAAATG

D8.txt CATCTATAGA AATAAAGTGA AAAGATAAAA TCATTTCTCG TCTGGTAGCA  
SPD010.txt CATCTATAGA AATAAAGTGA AAAGATAAAA TCATTTCTCG TCTGGTAGCA  
DPD010.txt CATCTATAGA AATAAAGTGA AAAGATAAAA TCATTTCTCG TCTGGTAGCA  
SPD110.txt CATCTATAGA AATAAAGTGA AAAGATAAAA TCATTTCTCG TCTGGTAGCA  
XUE1.txt CATCTATAGA AATAAAGTGA AAAGATAAAA TCATTTCTCG TCTGGTAGCA  
Pepino.txt CATCTATAGA AATAAAGTGA AAAGATAAAA TCATTTCTCG TCTGGTAGCA  
Jin5-508.txt CATCTATAGA AATAAAGTGA AAAGATAAAA TCATTTCTCG TCTGGTAGCA  
EP6392.txt CATCTATAGA AATAAAGTGA AAAGATAAAA TCATTTCTCG TCTGGTAGCA

D8.txt CATTTGTCCA ATGTTTTTCT ATTTCAATTT GATGGTTTGA CTTTTGTATA  
SPD010.txt CATTTGTCCA ATGTTTTTCT ATTTCAATTT GATGGTTTGA CTTTTGTATA  
DPD010.txt CATTTGTCCA ATGTTTTTCT ATTTCAATTT GATGGTTTGA CTTTTGTATA  
SPD110.txt CATTTGTCCA ATGTTTTTCT ATTTCAATTT GATGGTTTGA CTTTTGTATA  
XUE1.txt CATTTGTCCA ATGTTTTTCT ATTTCAATTT GATGGTTTGA CTTTTGTATA  
Pepino.txt CATTTGTCCA ATGTTTTTCT ATTTCAATTT GATGGTTTGA CTTTTGTATA  
Jin5-508.txt CATTTGTCCA ATGTTTTTCT ATTTCAATTT GATGGTTTGA CTTTTGTATA  
EP6392.txt CATTTGTCCA ATGTTTTTCT ATTTCAATTT GATGGTTTGA CTTTTGTATA

|              |            |            |            |            |            |
|--------------|------------|------------|------------|------------|------------|
| D8.txt       | TCATAATTCA | ATATGCTACT | TTGATTTATA | CGTAATGTTA | ACTTCTTTGC |
| SPD010.txt   | TCATAATTCA | ATATGCTACT | TTGATTTATA | CGTAATGTTA | ACTTCTTTGC |
| DPD010.txt   | TCATAATTCA | ATATGCTACT | TTGATTTATA | CGTAATGTTA | ACTTCTTTGC |
| SPD110.txt   | TCATAATTCA | ATATGCTACT | TTGATTTATA | CGTAATGTTA | ACTTCTTTGC |
| XUE1.txt     | TCATAATTCA | ATATGCTACT | TTGATTTATA | CGTAATGTTA | ACTTCTTTGC |
| Pepino.txt   | TCATAATTCA | ATATGCTACT | TTGATTTATA | CGTAATGTTA | ACTTCTTTGC |
| Jin5-508.txt | TCATAATTCA | ATATGCTACT | TTGATTTATA | CGTAATGTTA | ACTTCTTTGC |
| EP6392.txt   | TCATAATTCA | ATATGCTACT | TTGATTTATA | CGTAATGTTA | ACTTCTTTGC |

|              |            |            |            |            |            |
|--------------|------------|------------|------------|------------|------------|
| D8.txt       | AGCACTTGCG | CAAACAATAC | AATGAGTTGT | TTCCTGCGTT | ATGTAACAAC |
| SPD010.txt   | AGCACTTGCG | CAAACAATAC | AATGAGTTGT | TTCCTGCGTT | ATGTAACAAC |
| DPD010.txt   | AGCACTTGCG | CAAACAATAC | AATGAGTTGT | TTCCTGCGTT | ATGTAACAAC |
| SPD110.txt   | AGCACTTGCG | CAAACAATAC | AATGAGTTGT | TTCCTGCGTT | ATGTAACAAC |
| XUE1.txt     | AGCACTTGCG | CAAACAATAC | AATGAGTTGT | TTCCTGCGTT | ATGTAACAAC |
| Pepino.txt   | AGCACTTGCG | CAAACAATAC | AATGAGTTGT | TTCCTGCGTT | ATGTAACAAC |
| Jin5-508.txt | AGCACTTGCG | CAAACAATAC | AATGAGTTGT | TTCCTGCGTT | ATGTAACAAC |
| EP6392.txt   | AGCACTTGCG | CAAACAATAC | AATGAGTTGT | TTCCTGCGTT | ATGTAACAAC |

|              |            |            |            |            |            |
|--------------|------------|------------|------------|------------|------------|
| D8.txt       | CATCCTGATA | TCTTTCCAGA | GGAGTTCTAC | TCATGGGAGG | AGTTCTTATG |
| SPD010.txt   | CATCCTGATA | TCTTTCCAGA | GGAGTTCTAC | TCATGGGAGG | AGTTCTTATG |
| DPD010.txt   | CATCCTGATA | TCTTTCCAGA | GGAGTTCTAC | TCATGGGAGG | AGTTCTTATG |
| SPD110.txt   | CATCCTGATA | TCTTTCCAGA | GGAGTTCTAC | TCATGGGAGG | AGTTCTTATG |
| XUE1.txt     | CATCCTGATA | TCTTTCCAGA | GGAGTTCTAC | TCATGGGAGG | AGTTCTTATG |
| Pepino.txt   | CATCCTGATA | TCTTTCCAGA | GGAGTTCTAC | TCATGGGAGG | AGTTCTTATG |
| Jin5-508.txt | CATCCTGATA | TCTTTCCAGA | GGAGTTCTAC | TCATGGGAGG | AGTTCTTATG |
| EP6392.txt   | CATCCTGATA | TCTTTCCAGA | GGAGTTCTAC | TCATGGGAGG | AGTTCTTATG |

|              |            |            |            |            |            |
|--------------|------------|------------|------------|------------|------------|
| D8.txt       | GGCTTGTGAA | CTTTGGTATT | CAAATAGCTT | GAAAATCATG | TTCCCTGATG |
| SPD010.txt   | GGCTTGTGAA | CTTTGGTATT | CAAATAGCTT | GAAAATCATG | TTCCCTGATG |
| DPD010.txt   | GGCTTGTGAA | CTTTGGTATT | CAAATAGCTT | GAAAATCATG | TTCCCTGATG |
| SPD110.txt   | GGCTTGTGAA | CTTTGGTATT | CAAATAGCTT | GAAAATCATG | TTCCCTGATG |
| XUE1.txt     | GGCTTGTGAA | CTTTGGTATT | CAAATAGCTT | GAAAATCATG | TTCCCTGATG |
| Pepino.txt   | GGCTTGTGAA | CTTTGGTATT | CAAATAGCTT | GAAAATCATG | TTCCCTGATG |
| Jin5-508.txt | GGCTTGTGAA | CTTTGGTATT | CAAATAGCTT | GAAAATCATG | TTCCCTGATG |
| EP6392.txt   | GGCTTGTGAA | CTTTGGTATT | CAAATAGCTT | GAAAATCATG | TTCCCTGATG |

|            |            |            |            |            |            |
|------------|------------|------------|------------|------------|------------|
| D8.txt     | GAAATGTCAG | GACTTGCTTG | GTTCCAATTG | CAGGTTTTCT | CAACCACTCG |
| SPD010.txt | GAAATGTCAG | GACTTGCTTG | GTTCCAATTG | CAGGTTTTCT | CAACCACTCG |
| DPD010.txt | GAAATGTCAG | GACTTGCTTG | GTTCCAATTG | CAGGTTTTCT | CAACCACTCG |
| SPD110.txt | GAAATGTCAG | GACTTGCTTG | GTTCCAATTG | CAGGTTTTCT | CAACCACTCG |



XUE1.txt GAAATGTCAG GACTTGCTTG GTTCCAATTG CAGGTTTTCT CAACCACTCG  
Pepino.txt GAAATGTCAG GACTTGCTTG GTTCCAATTG CAGGTTTTCT CAACCACTCG  
Jin5-508.txt GAAATGTCAG GACTTGCTTG GTTCCAATTG CAGGTTTTCT CAACCACTCG  
EP6392.txt GAAATGTCAG GACTTGCTTG GTTCCAATTG CAGGTTTTCT CAACCACTCG

D8.txt GTATGTCTGA TTCTCGCTTC TCATATCCCA TACGCCATTT TCTCCTCAAT  
SPD010.txt GTATGTCTGA TTCTCGCTTC TCATATCCCA TACGCCATTT TCTCCTCAAT  
DPD010.txt GTATGTCTGA TTCTCGCTTC TCATATCCCA TACGCCATTT TCTCCTCAAT  
SPD110.txt GTATGTCTGA TTCTCGCTTC TCATATCCCA TACGCCATTT TCTCCTCAAT  
XUE1.txt GTATGTCTGA TTCTCGCTTC TCATATCCCA TACGCCATTT TCTCCTCAAT  
Pepino.txt GTATGTCTGA TTCTCGCTTC TCATATCCCA TACGCCATTT TCTCCTCAAT  
Jin5-508.txt GTATGTCTGA TTCTCGCTTC TCATATCCCA TACGCCATTT TCTCCTCAAT  
EP6392.txt GTATGTCTGA TTCTCGCTTC TCATATCCCA TACGCCATTT TCTCCTCAAT

D8.txt GATGGGGACT TGGGGAGTGA TTTTAATTGT GAAAATTGTA CGAAGTGTAG  
SPD010.txt GATGGGGACT TGGGGAGTGA TTTTAATTGT GAAAATTGTA CGAAGTGTAG  
DPD010.txt GATGGGGACT TGGGGAGTGA TTTTAATTGT GAAAATTGTA CGAAGTGTAG  
SPD110.txt GATGGGGACT TGGGGAGTGA TTTTAATTGT GAAAATTGTA CGAAGTGTAG  
XUE1.txt GATGGGGACT TGGGGAGTGA TTTTAATTGT GAAAATTGTA CGAAGTGTAG  
Pepino.txt GATGGGGACT TGGGGAGTGA TTTTAATTGT GAAAATTGTA CGAAGTGTAG  
Jin5-508.txt GATGGGGACT TGGGGAGTGA TTTTAATTGT GAAAATTGTA CGAAGTGTAG  
EP6392.txt GATGGGGACT TGGGGAGTGA TTTTAATTGT GAAAATTGTA CGAAGTGTAG

D8.txt TTCAATTTAC TTGAACTAGT TTATCTTTAA CTTCTTACCT CAAATTGATT  
SPD010.txt TTCAATTTAC TTGAACTAGT TTATCTTTAA CTTCTTACCT CAAATTGATT  
DPD010.txt TTCAATTTAC TTGAACTAGT TTATCTTTAA CTTCTTACCT CAAATTGATT  
SPD110.txt TTCAATTTAC TTGAACTAGT TTATCTTTAA CTTCTTACCT CAAATTGATT  
XUE1.txt TTCAATTTAC TTGAACTAGT TTATCTTTAA CTTCTTACCT CAAATTGATT  
Pepino.txt TTCAATTTAC TTGAACTAGT TTATCTTTAA CTTCTTACCT CAAATTGATT  
Jin5-508.txt TTCAATTTAC TTGAACTAGT TTATCTTTAA CTTCTTACCT CAAATTGATT  
EP6392.txt TTCAATTTAC TTGAACTAGT TTATCTTTAA CTTCTTACCT CAAATTGATT

D8.txt TCCTTGCTT TGTACTTTTT TGCCTCGGTT ACTTGACTGC TTATAGCTTG  
SPD010.txt TCCTTGCTT TGTACTTTTT TGCCTCGGTT ACTTGACTGC TTATAGCTTG  
DPD010.txt TCCTTGCTT TGTACTTTTT TGCCTCGGTT ACTTGACTGC TTATAGCTTG  
SPD110.txt TCCTTGCTT TGTACTTTTT TGCCTCGGTT ACTTGACTGC TTATAGCTTG  
XUE1.txt TCCTTGCTT TGTACTTTTT TGCCTCGGTT ACTTGACTGC TTATAGCTTG  
Pepino.txt TCCTTGCTT TGTACTTTTT TGCCTCGGTT ACTTGACTGC TTATAGCTTG  
Jin5-508.txt TCCTTGCTT TGTACTTTTT TGCCTCGGTT ACTTGACTGC TTATAGCTTG  
EP6392.txt TCCTTGCTT TGTACTTTTT TGCCTCGGTT ACTTGACTGC TTATAGCTTG

D8.txt CAATTTTTTT ACTGTTCTAC TGACCATAGA TTCATGTTTC TTCGATGGAT  
SPD010.txt CAATTTTTTT ACTGTTCTAC TGACCATAGA TTCATGTTTC TTCGATGGAT  
DPD010.txt CAATTTTTTT ACTGTTCTAC TGACCATAGA TTCATGTTTC TTCGATGGAT  
SPD110.txt CAATTTTTTT ACTGTTCTAC TGACCATAGA TTCATGTTTC TTCGATGGAT  
XUE1.txt CAATTTTTTT ACTGTTCTAC TGACCATAGA TTCATGTTTC TTCGATGGAT  
Pepino.txt CAATTTTTTT ACTGTTCTAC TGACCATAGA TTCATGTTTC TTCGATGGAT  
Jin5-508.txt CAATTTTTTT ACTGTTCTAC TGACCATAGA TTCATGTTTC TTCGATGGAT  
EP6392.txt CAATTTTTTT ACTGTTCTAC TGACCATAGA TTCATGTTTC TTCGATGGAT

D8.txt TTTCCCCCAT TAAAGTTGGA TGCCACTCTG ATTTTTTCTT TCTCATTCT  
SPD010.txt TTTCCCCCAT TAAAGTTGGA TGCCACTCTG ATTTTTTCTT TCTCATTCT  
DPD010.txt TTTCCCCCAT TAAAGTTGGA TGCCACTCTG ATTTTTTCTT TCTCATTCT  
SPD110.txt TTTCCCCCAT TAAAGTTGGA TGCCACTCTG ATTTTTTCTT TCTCATTCT  
XUE1.txt TTTCCCCCAT TAAAGTTGGA TGCCACTCTG ATTTTTTCTT TCTCATTCT  
Pepino.txt TTTCCCCCAT TAAAGTTGGA TGCCACTCTG ATTTTTTCTT TCTCATTCT  
Jin5-508.txt TTTCCCCCAT TAAAGTTGGA TGCCACTCTG ATTTTTTCTT TCTCATTCT  
EP6392.txt TTTCCCCCAT TAAAGTTGGA TGCCACTCTG ATTTTTTCTT TCTCATTCT

D8.txt GAGTTGTGTC ACATTTCTTG TTTGTTTGTT TGTTTGATGT TTCTAGTATA  
SPD010.txt GAGTTGTGTC ACATTTCTTG TTTGTTTGTT TGTTTGATGT TTCTAGTATA  
DPD010.txt GAGTTGTGTC ACATTTCTTG TTTGTTTGTT TGTTTGATGT TTCTAGTATA  
SPD110.txt GAGTTGTGTC ACATTTCTTG TTTGTTTGTT TGTTTGATGT TTCTAGTATA  
XUE1.txt GAGTTGTGTC ACATTTCTTG TTTGTTTGTT TGTTTGATGT TTCTAGTATA  
Pepino.txt GAGTTGTGTC ACATTTCTTG TTTGTTTGTT TGTTTGATGT TTCTAGTATA  
Jin5-508.txt GAGTTGTGTC ACATTTCTTG TTTGTTTGTT TGTTTGATGT TTCTAGTATA  
EP6392.txt GAGTTGTGTC ACATTTCTTG TTTGTTTGTT TGTTTGATGT TTCTAGTATA

D8.txt TTATTTTGAA TTTGAGACCA CATCTTCCTT TGCTTCATTG CTATTTGGTT  
SPD010.txt TTATTTTGAA TTTGAGACCA CATCTTCCTT TGCTTCATTG CTATTTGGTT  
DPD010.txt TTATTTTGAA TTTGAGACCA CATCTTCCTT TGCTTCATTG CTATTTGGTT  
SPD110.txt TTATTTTGAA TTTGAGACCA CATCTTCCTT TGCTTCATTG CTATTTGGTT  
XUE1.txt TTATTTTGAA TTTGAGACCA CATCTTCCTT TGCTTCATTG CTATTTGGTT  
Pepino.txt TTATTTTGAA TTTGAGACCA CATCTTCCTT TGCTTCATTG CTATTTGGTT  
Jin5-508.txt TTATTTTGAA TTTGAGACCA CATCTTCCTT TGCTTCATTG CTATTTGGTT  
EP6392.txt TTATTTTGAA TTTGAGACCA CATCTTCCTT TGCTTCATTG CTATTTGGTT

D8.txt CTTTGGGACA GTTGCATCCG CACATACTGC ACTATGGCAA AGTTGATTCA  
SPD010.txt CTTTGGGACA GTTGCATCCG CACATACTGC ACTATGGCAA AGTTGATTCA

DPD010.txt CTTTGGGACA GTTGCATCCG CACATACTGC ACTATGGCAA AGTTGATTCA  
SPD110.txt CTTTGGGACA GTTGCATCCG CACATACTGC ACTATGGCAA AGTTGATTCA  
XUE1.txt CTTTGGGACA GTTGCATCCG CACATACTGC ACTATGGCAA AGTTGATTCA  
Pepino.txt CTTTGGGACA GTTGCATCCG CACATACTGC ACTATGGCAA AGTTGATTCA  
Jin5-508.txt CTTTGGGACA GTTGCATCCG CACATACTGC ACTATGGCAA AGTTGATTCA  
EP6392.txt CTTTGGGACA GTTGCATCCG CACATACTGC ACTATGGCAA AGTTGATTCA

D8.txt GATACAGATT CCTTGAAATT CCGTCTATCA AGACCATGCC GTGCAGGAGA  
SPD010.txt GATACAGATT CCTTGAAATT CCGTCTATCA AGACCATGCC GTGCAGGAGA  
DPD010.txt GATACAGATT CCTTGAAATT CCGTCTATCA AGACCATGCC GTGCAGGAGA  
SPD110.txt GATACAGATT CCTTGAAATT CCGTCTATCA AGACCATGCC GTGCAGGAGA  
XUE1.txt GATACAGATT CCTTGAAATT CCGTCTATCA AGACCATGCC GTGCAGGAGA  
Pepino.txt GATACAGATT CCTTGAAATT CCGTCTATCA AGACCATGCC GTGCAGGAGA  
Jin5-508.txt GATACAGATT CCTTGAAATT CCGTCTATCA AGACCATGCC GTGCAGGAGA  
EP6392.txt GATACAGATT CCTTGAAATT CCGTCTATCA AGACCATGCC GTGCAGGAGA

D8.txt AGAGTGTTAC CTTAGTTATG GGAATTACTC TGGGTCTCAT TTAGTTACTT  
SPD010.txt AGAGTGTTAC CTTAGTTATG GGAATTACTC TGGGTCTCAT TTAGTTACTT  
DPD010.txt AGAGTGTTAC CTTAGTTATG GGAATTACTC TGGGTCTCAT TTAGTTACTT  
SPD110.txt AGAGTGTTAC CTTAGTTATG GGAATTACTC TGGGTCTCAT TTAGTTACTT  
XUE1.txt AGAGTGTTAC CTTAGTTATG GGAATTACTC TGGGTCTCAT TTAGTTACTT  
Pepino.txt AGAGTGTTAC CTTAGTTATG GGAATTACTC TGGGTCTCAT TTAGTTACTT  
Jin5-508.txt AGAGTGTTAC CTTAGTTATG GGAATTACTC TGGGTCTCAT TTAGTTACTT  
EP6392.txt AGAGTGTTAC CTTAGTTATG GGAATTACTC TGGGTCTCAT TTAGTTACTT

D8.txt TCTATGGCTT TTTACCTGAA GGAGACAACG TAAATGATGT TATTCCATTA  
SPD010.txt TCTATGGCTT TTTACCTGAA GGAGACAACG TAAATGATGT TATTCCATTA  
DPD010.txt TCTATGGCTT TTTACCTGAA GGAGACAACG TAAATGATGT TATTCCATTA  
SPD110.txt TCTATGGCTT TTTACCTGAA GGAGACAACG TAAATGATGT TATTCCATTA  
XUE1.txt TCTATGGCTT TTTACCTGAA GGAGACAACG TAAATGATGT TATTCCATTA  
Pepino.txt TCTATGGCTT TTTACCTGAA GGAGACAACG TAAATGATGT TATTCCATTA  
Jin5-508.txt TCTATGGCTT TTTACCTGAA GGAGACAACG TAAATGATGT TATTCCATTA  
EP6392.txt TCTATGGCTT TTTACCTGAA GGAGACAACG TAAATGATGT TATTCCATTA

D8.txt GGTAATTTCT AGTTCTGTCC AGTATACATT TGAATAGTGC TTCCTTTTAC  
SPD010.txt GGTAATTTCT AGTTCTGTCC AGTATACATT TGAATAGTGC TTCCTTTTAC  
DPD010.txt GGTAATTTCT AGTTCTGTCC AGTATACATT TGAATAGTGC TTCCTTTTAC  
SPD110.txt GGTAATTTCT AGTTCTGTCC AGTATACATT TGAATAGTGC TTCCTTTTAC  
XUE1.txt GGTAATTTCT AGTTCTGTCC AGTATACATT TGAATAGTGC TTCCTTTTAC  
Pepino.txt GGTAATTTCT AGTTCTGTCC AGTATACATT TGAATAGTGC TTCCTTTTAC

Jin5-508.txt GGTAATTTCT AGTTCTGTCC AGTATACATT TGAATAGTGC TTCCTTTTAC  
EP6392.txt GGTAATTTCT AGTTCTGTCC AGTATACATT TGAATAGTGC TTCCTTTTAC

D8.txt TTTATTATGC AATCTATGCT TATCTTTCTT ATATTAATAT TACCATTGTT  
SPD010.txt TTTATTATGC AATCTATGCT TATCTTTCTT ATATTAATAT TACCATTGTT  
DPD010.txt TTTATTATGC AATCTATGCT TATCTTTCTT ATATTAATAT TACCATTGTT  
SPD110.txt TTTATTATGC AATCTATGCT TATCTTTCTT ATATTAATAT TACCATTGTT  
XUE1.txt TTTATTATGC AATCTATGCT TATCTTTCTT ATATTAATAT TACCATTGTT  
Pepino.txt TTTATTATGC AATCTATGCT TATCTTTCTT ATATTAATAT TACCATTGTT  
Jin5-508.txt TTTATTATGC AATCTATGCT TATCTTTCTT ATATTAATAT TACCATTGTT  
EP6392.txt TTTATTATGC AATCTATGCT TATCTTTCTT ATATTAATAT TACCATTGTT

D8.txt TATTTGTGAG TGCAGACATT GACTTCGGTG ATGATGATAA CAATAACATT  
SPD010.txt TATTTGTGAG TGCAGACATT GACTTCGGTG ATGATGATAA CAATAACATT  
DPD010.txt TATTTGTGAG TGCAGACATT GACTTCGGTG ATGATGATAA CAATAACATT  
SPD110.txt TATTTGTGAG TGCAGACATT GACTTCGGTG ATGATGATAA CAATAACATT  
XUE1.txt TATTTGTGAG TGCAGACATT GACTTCGGTG ATGATGATAA CAATAACATT  
Pepino.txt TATTTGTGAG TGCAGACATT GACTTCGGTG ATGATGATAA CAATAACATT  
Jin5-508.txt TATTTGTGAG TGCAGACATT GACTTCGGTG ATGATGATAA CAATAACATT  
EP6392.txt TATTTGTGAG TGCAGACATT GACTTCGGTG ATGATGATAA CAATAACATT

D8.txt ACGTCAGACT GGAGTACTCA TATGGTGAGG GGCACCTGGT TGTCAAAGAT  
SPD010.txt ACGTCAGACT GGAGTACTCA TATGGTGAGG GGCACCTGGT TGTCAAAGAT  
DPD010.txt ACGTCAGACT GGAGTACTCA TATGGTGAGG GGCACCTGGT TGTCAAAGAT  
SPD110.txt ACGTCAGACT GGAGTACTCA TATGGTGAGG GGCACCTGGT TGTCAAAGAT  
XUE1.txt ACGTCAGACT GGAGTACTCA TATGGTGAGG GGCACCTGGT TGTCAAAGAT  
Pepino.txt ACGTCAGACT GGAGTACTCA TATGGTGAGG GGCACCTGGT TGTCAAAGAT  
Jin5-508.txt ACGTCAGACT GGAGTACTCA TATGGTGAGG GGCACCTGGT TGTCAAAGAT  
EP6392.txt ACGTCAGACT GGAGTACTCA TATGGTGAGG GGCACCTGGT TGTCAAAGAT

D8.txt CCAAAGCATA TTCCATTATG GTCTGCCCTC ACCGTTCTTA GAGTGTTTTC  
SPD010.txt CCAAAGCATA TTCCATTATG GTCTGCCCTC ACCGTTCTTA GAGTGTTTTC  
DPD010.txt CCAAAGCATA TTCCATTATG GTCTGCCCTC ACCGTTCTTA GAGTGTTTTC  
SPD110.txt CCAAAGCATA TTCCATTATG GTCTGCCCTC ACCGTTCTTA GAGTGTTTTC  
XUE1.txt CCAAAGCATA TTCCATTATG GTCTGCCCTC ACCGTTCTTA GAGTGTTTTC  
Pepino.txt CCAAAGCATA TTCCATTATG GTCTGCCCTC ACCGTTCTTA GAGTGTTTTC  
Jin5-508.txt CCAAAGCATA TTCCATTATG GTCTGCCCTC ACCGTTCTTA GAGTGTTTTC  
EP6392.txt CCAAAGCATA TTCCATTATG GTCTGCCCTC ACCGTTCTTA GAGTGTTTTC

D8.txt GGAAAGCTCT GTTCCCTGGA TTACACACCA ACTGTAAGGT AATTTTTCTT  
SPD010.txt GGAAAGCTCT GTTCCCTGGA TTACACACCA ACTGTAAGGT AATTTTTCTT  
DPD010.txt GGAAAGCTCT GTTCCCTGGA TTACACACCA ACTGTAAGGT AATTTTTCTT  
SPD110.txt GGAAAGCTCT GTTCCCTGGA TTACACACCA ACTGTAAGGT AATTTTTCTT  
XUE1.txt GGAAAGCTCT GTTCCCTGGA TTACACACCA ACTGTAAGGT AATTTTTCTT  
Pepino.txt GGAAAGCTCT GTTCCCTGGA TTACACACCA ACTGTAAGGT AATTTTTCTT  
Jin5-508.txt GGAAAGCTCT GTTCCCTGGA TTACACACCA ACTGTAAGGT AATTTTTCTT  
EP6392.txt GGAAAGCTCT GTTCCCTGGA TTACACACCA ACTGTAAGGT AATTTTTCTT

D8.txt AGGGTAATTG CATTCAATAA CACTTCAGAG ATAATAATTA AGTGTATAGC  
SPD010.txt AGGGTAATTG CATTCAATAA CACTTCAGAG ATAATAATTA AGTGTATAGC  
DPD010.txt AGGGTAATTG CATTCAATAA CACTTCAGAG ATAATAATTA AGTGTATAGC  
SPD110.txt AGGGTAATTG CATTCAATAA CACTTCAGAG ATAATAATTA AGTGTATAGC  
XUE1.txt AGGGTAATTG CATTCAATAA CACTTCAGAG ATAATAATTA AGTGTATAGC  
Pepino.txt AGGGTAATTG CATTCAATAA CACTTCAGAG ATAATAATTA AGTGTATAGC  
Jin5-508.txt AGGGTAATTG CATTCAATAA CACTTCAGAG ATAATAATTA AGTGTATAGC  
EP6392.txt AGGGTAATTG CATTCAATAA CACTTCAGAG ATAATAATTA AGTGTATAGC

D8.txt AACATTTTAA AAGAATTGCT AATATACTAA AACCTATTAG TGATAGACTT  
SPD010.txt AACATTTTAA AAGAATTGCT AATATACTAA AACCTATTAG TGATAGACTT  
DPD010.txt AACATTTTAA AAGAATTGCT AATATACTAA AACCTATTAG TGATAGACTT  
SPD110.txt AACATTTTAA AAGAATTGCT AATATACTAA AACCTATTAG TGATAGACTT  
XUE1.txt AACATTTTAA AAGAATTGCT AATATACTAA AACCTATTAG TGATAGACTT  
Pepino.txt AACATTTTAA AAGAATTGCT AATATACTAA AACCTATTAG TGATAGACTT  
Jin5-508.txt AACATTTTAA AAGAATTGCT AATATACTAA AACCTATTAG TGATAGACTT  
EP6392.txt AACATTTTAA AAGAATTGCT AATATACTAA AACCTATTAG TGATAGACTT

D8.txt TATCGTTGGT AGACTCCTAT TAGTGATGTG CTCTACCACT AATAGACTCC  
SPD010.txt TATCGTTGGT AGACTCCTAT TAGTGATGTG CTCTACCACT AATAGACTCC  
DPD010.txt TATCGTTGGT AGACTCCTAT TAGTGATGTG CTCTACCACT AATAGACTCC  
SPD110.txt TATCGTTGGT AGACTCCTAT TAGTGATGTG CTCTACCACT AATAGACTCC  
XUE1.txt TATCGTTGGT AGACTCCTAT TAGTGATGTG CCTACCACT AATAGACTCC  
Pepino.txt TATCGTTGGT AGACTCCTAT TAGTGATGTG CCTACCACT AATAGACTCC  
Jin5-508.txt TATCGTTGGT AGACTCCTAT TAGTGATGTG CTCTACCACT AATAGACTCC  
EP6392.txt TATCGTTGGT AGACTCCTAT TAGTGATGTG CTCTACCACT AATAGACTCC

D8.txt AAGAGTTAGA TATAAATTTT GTTATATTTG TAAATTCCTT TACATATTGA  
SPD010.txt AAGAGTTAGA TATAAATTTT GTTATATTTG TAAATTCCTT TACATATTGA  
DPD010.txt AAGAGTTAGA TATAAATTTT GTTATATTTG TAAATTCCTT TACATATTGA  
SPD110.txt AAGAGTTAGA TATAAATTTT GTTATATTTG TAAATTCCTT TACATATTGA

XUE1.txt AAGAGTTAGA TATAAATTTT GTTATATTTG TAAATTCTTT TACATATTGA  
Pepino.txt AAGAGTTAGA TATAAATTTT GTTATATTTG TAAATTCTTT TACATATTGA  
Jin5-508.txt AAGAGTTAGA TATAAATTTT GTTATATTTG TAAATTCTTT TACATATTGA  
EP6392.txt AAGAGTTAGA TATAAATTTT GTTATATTTG TAAATTCTTT TACATATTGA

D8.txt TGCTTGTAAT AAATCACTAT ACTCGTAACC ATTTGGTTTG TGAAAATTAA  
SPD010.txt TGCTTGTAAT AAATCACTAT ACTCGTAACC ATTTGGTTTG TGAAAATTAA  
DPD010.txt TGCTTGTAAT AAATCACTAT ACTCGTAACC ATTTGGTTTG TGAAAATTAA  
SPD110.txt TGCTTGTAAT AAATCACTAT ACTCGTAACC ATTTGGTTTG TGAAAATTAA  
XUE1.txt TGCTTGTAAT AAATCACTAT ACTCGTAACC ATTTGGTTTG TGAAAATTAA  
Pepino.txt TGCTTGTAAT AAATCACTAT ACTCGTAACC ATTTGGTTTG TGAAAATTAA  
Jin5-508.txt TGCTTGTAAT AAATCACTAT ACTCGTAACC ATTTGGTTTG TGAAAATTAA  
EP6392.txt TGCTTGTAAT AAATCACTAT ACTCGTAACC ATTTGGTTTG TGAAAATTAA

D8.txt GCTTTTAAGT TTCACCAATA ACTTAACAAG TTTCTTTATA TCATTATTTA  
SPD010.txt GCTTTTAAGT TTCACCAATA ACTTAACAAG TTTCTTTATA TCATTATTTA  
DPD010.txt GCTTTTAAGT TTCACCAATA ACTTAACAAG TTTCTTTATA TCATTATTTA  
SPD110.txt GCTTTTAAGT TTCACCAATA ACTTAACAAG TTTCTTTATA TCATTATTTA  
XUE1.txt GCTTTTAAGT TTCACCAATA ACTTAACAAG TTTCTTTATA TCATTATTTA  
Pepino.txt GCTTTTAAGT TTCACCAATA ACTTAACAAG TTTCTTTATA TCATTATTTA  
Jin5-508.txt GCTTTTAAGT TTCACCAATA ACTTAACAAG TTTCTTTATA TCATTATTTA  
EP6392.txt GCTTTTAAGT TTCACCAATA ACTTAACAAG TTTCTTTATA TCATTATTTA

D8.txt CTTTCTACCA ACGTTCTGAA AAACCAAGCT ATTTCTTTGA AATTTGACTA  
SPD010.txt CTTTCTACCA ACGTTCTGAA AAACCAAGCT ATTTCTTTGA AATTTGACTA  
DPD010.txt CTTTCTACCA ACGTTCTGAA AAACCAAGCT ATTTCTTTGA AATTTGACTA  
SPD110.txt CTTTCTACCA ACGTTCTGAA AAACCAAGCT ATTTCTTTGA AATTTGACTA  
XUE1.txt CTTTCTACCA ACGTTCTGAA AAACCAAGCT ATTTCTTTGA AATTTGACTA  
Pepino.txt CTTTCTACCA ACGTTCTGAA AAACCAAGCT ATTTCTTTGA AATTTGACTA  
Jin5-508.txt CTTTCTACCA ACGTTCTGAA AAACCAAGCT ATTTCTTTGA AATTTGACTA  
EP6392.txt CTTTCTACCA ACGTTCTGAA AAACCAAGCT ATTTCTTTGA AATTTGACTA

D8.txt AAATGAAATC TTGTAATATA ATATAGGCCT TTTAATTTAT AGGATTTAGA  
SPD010.txt AAATGAAATC TTGTAATATA ATATAGGCCT TTTAATTTAT AGGATTTAGA  
DPD010.txt AAATGAAATC TTGTAATATA ATATAGGCCT TTTAATTTAT AGGATTTAGA  
SPD110.txt AAATGAAATC TTGTAATATA ATATAGGCCT TTTAATTTAT AGGATTTAGA  
XUE1.txt AAATGAAATC TTGTAATATA ATATAGGCCT TTTAATTTAT AGGATTTAGA  
Pepino.txt AAATGAAATC TTGTAATATA ATATAGGCCT TTTAATTTAT AGGATTTAGA  
Jin5-508.txt AAATGAAATC TTGTAATATA ATATAGGCCT TTTAATTTAT AGGATTTAGA  
EP6392.txt AAATGAAATC TTGTAATATA ATATAGGCCT TTTAATTTAT AGGATTTAGA

D8.txt CTTTGTTTAC ATTGGTTATT ATTACTTTTT TATCTTAAAT CCGTAGCTAC  
SPD010.txt CTTTGTTTAC ATTGGTTATT ATTACTTTTT TATCTTAAAT CCGTAGCTAC  
DPD010.txt CTTTGTTTAC ATTGGTTATT ATTACTTTTT TATCTTAAAT CCGTAGCTAC  
SPD110.txt CTTTGTTTAC ATTGGTTATT ATTACTTTTT TATCTTAAAT CCGTAGCTAC  
XUE1.txt CTTTGTTTAC ATTGGTTATT ATTACTTTTT TATCTTAAAT CCGTAGCTAC  
Pepino.txt CTTTGTTTAC ATTGGTTATT ATTACTTTTT TATCTTAAAT CCGTAGCTAC  
Jin5-508.txt CTTTGTTTAC ATTGGTTATT ATTACTTTTT TATCTTAAAT CCGTAGCTAC  
EP6392.txt CTTTGTTTAC ATTGGTTATT ATTACTTTTT TATCTTAAAT CCGTAGCTAC

D8.txt AGGGAAGCAT GGAAGGTGAA ATAGAAGTCC TCAATGAACT CCTCTCGATC  
SPD010.txt AGGGAAGCAT GGAAGGTGAA ATAGAAGTCC TCAATGAACT CCTCTCGATC  
DPD010.txt AGGGAAGCAT GGAAGGTGAA ATAGAAGTCC TCAATGAACT CCTCTCGATC  
SPD110.txt AGGGAAGCAT GGAAGGTGAA ATAGAAGTCC TCAATGAACT CCTCTCGATC  
XUE1.txt AGGGAAGCAT GGAAGGTGAA ATAGAAGTCC TCAATGAACT CCTCTCGATC  
Pepino.txt AGGGAAGCAT GGAAGGTGAA ATAGAAGTCC TCAATGAACT CCTCTCGATC  
Jin5-508.txt AGGGAAGCAT GGAAGGTGAA ATAGAAGTCC TCAATGAACT CCTCTCGATC  
EP6392.txt AGGGAAGCAT GGAAGGTGAA ATAGAAGTCC TCAATGAACT CCTCTCGATC

D8.txt TTTTCTGAAA TGATGGAAAA ACTTGAGGAC GAGGATGAGG ATGAAAGCCG  
SPD010.txt TTTTCTGAAA TGATGGAAAA ACTTGAGGAC GAGGATGAGG ATGAAAGCCG  
DPD010.txt TTTTCTGAAA TGATGGAAAA ACTTGAGGAC GAGGATGAGG ATGAAAGCCG  
SPD110.txt TTTTCTGAAA TGATGGAAAA ACTTGAGGAC GAGGATGAGG ATGAAAGCCG  
XUE1.txt TTTTCTGAAA TGATGGAAAA ACTTGAGGAC GAGGATGAGG ATGAAAGCCG  
Pepino.txt TTTTCTGAAA TGATGGAAAA ACTTGAGGAC GAGGATGAGG ATGAAAGCCG  
Jin5-508.txt TTTTCTGAAA TGATGGAAAA ACTTGAGGAC GAGGATGAGG ATGAAAGCCG  
EP6392.txt TTTTCTGAAA TGATGGAAAA ACTTGAGGAC GAGGATGAGG ATGAAAGCCG

D8.txt GTAATGAAGT GTAAATGCAA CTTTATTGAA GCAACTCTTT TCCATGGAAT  
SPD010.txt GTAATGAAGT GTAAATGCAA CTTTATTGAA GCAACTCTTT TCCATGGAAT  
DPD010.txt GTAATGAAGT GTAAATGCAA CTTTATTGAA GCAACTCTTT TCCATGGAAT  
SPD110.txt GTAATGAAGT GTAAATGCAA CTTTATTGAA GCAACTCTTT TCCATGGAAT  
XUE1.txt GTAATGAAGT GTAAATGCAA CTTTATTGAA GCAACTCTTT TCCATGGAAT  
Pepino.txt GTAATGAAGT GTAAATGCAA CTTTATTGAA GCAACTCTTT TCCATGGAAT  
Jin5-508.txt GTAATGAAGT GTAAATGCAA CTTTATTGAA GCAACTCTTT TCCATGGAAT  
EP6392.txt GTAATGAAGT GTAAATGCAA CTTTATTGAA GCAACTCTTT TCCATGGAAT

D8.txt AAACTTGAAT GTTTTGGTCT TTTGCAGGAC AAGTACAGAA TGGGATATAA  
SPD010.txt AAACTTGAAT GTTTTGGTCT TTTGCAGGAC AAGTACAGAA TGGGATATAA

|              |            |            |            |            |            |
|--------------|------------|------------|------------|------------|------------|
| DPD010.txt   | AAACTTGAAT | GTTTTGGTCT | TTTGCAGGAC | AAGTACAGAA | TGGGATATAA |
| SPD110.txt   | AAACTTGAAT | GTTTTGGTCT | TTTGCAGGAC | AAGTACAGAA | TGGGATATAA |
| XUE1.txt     | AAACTTGAAT | GTTTTGGTCT | TTTGCAGGAC | AAGTACAGAA | TGGGATATAA |
| Pepino.txt   | AAACTTGAAT | GTTTTGGTCT | TTTGCAGGAC | AAGTACAGAA | TGGGATATAA |
| Jin5-508.txt | AAACTTGAAT | GTTTTGGTCT | TTTGCAGGAC | AAGTACAGAA | TGGGATATAA |
| EP6392.txt   | AAACTTGAAT | GTTTTGGTCT | TTTGCAGGAC | AAGTACAGAA | TGGGATATAA |

|              |            |            |            |            |            |
|--------------|------------|------------|------------|------------|------------|
| D8.txt       | AGTTAGCACT | GGAGTACAAA | GATCTACAAA | GGAAGATAGT | TTCCTCATGT |
| SPD010.txt   | AGTTAGCACT | GGAGTACAAA | GATCTACAAA | GGAAGATAGT | TTCCTCATGT |
| DPD010.txt   | AGTTAGCACT | GGAGTACAAA | GATCTACAAA | GGAAGATAGT | TTCCTCATGT |
| SPD110.txt   | AGTTAGCACT | GGAGTACAAA | GATCTACAAA | GGAAGATAGT | TTCCTCATGT |
| XUE1.txt     | AGTTAGCACT | GGAGTACAAA | GATCTACAAA | GGAAGATAGT | TTCCTCATGT |
| Pepino.txt   | AGTTAGCACT | GGAGTACAAA | GATCTACAAA | GGAAGATAGT | TTCCTCATGT |
| Jin5-508.txt | AGTTAGCACT | GGAGTACAAA | GATCTACAAA | GGAAGATAGT | TTCCTCATGT |
| EP6392.txt   | AGTTAGCACT | GGAGTACAAA | GATCTACAAA | GGAAGATAGT | TTCCTCATGT |

|              |            |            |            |            |            |
|--------------|------------|------------|------------|------------|------------|
| D8.txt       | CTGACTTCAT | GTCATTCTGG | TCTCAAGATG | GTGGAAATTG | CATTATGCGA |
| SPD010.txt   | CTGACTTCAT | GTCATTCTGG | TCTCAAGATG | GTGGAAATTG | CATTATGCGA |
| DPD010.txt   | CTGACTTCAT | GTCATTCTGG | TCTCAAGATG | GTGGAAATTG | CATTATGCGA |
| SPD110.txt   | CTGACTTCAT | GTCATTCTGG | TCTCAAGATG | GTGGAAATTG | CATTATGCGA |
| XUE1.txt     | CTGACTTCAT | GTCATTCTGG | TCTCAAGATG | GTGGAAATTG | CATTATGCGA |
| Pepino.txt   | CTGACTTCAT | GTCATTCTGG | TCTCAAGATG | GTGGAAATTG | CATTATGCGA |
| Jin5-508.txt | CTGACTTCAT | GTCATTCTGG | TCTCAAGATG | GTGGAAATTG | CATTATGCGA |
| EP6392.txt   | CTGACTTCAT | GTCATTCTGG | TCTCAAGATG | GTGGAAATTG | CATTATGCGA |

|              |            |            |          |
|--------------|------------|------------|----------|
| D8.txt       | TTGCATGAAA | GAGGACACTC | GAGGCTAA |
| SPD010.txt   | TTGCATGAAA | GAGGACACTC | GAGGCTAA |
| DPD010.txt   | TTGCATGAAA | GAGGACACTC | GAGGCTAA |
| SPD110.txt   | TTGCATGAAA | GAGGACACTC | GAGGCTAA |
| XUE1.txt     | TTGCATGAAA | GAGGACACTC | GAGGCTAA |
| Pepino.txt   | TTGCATGAAA | GAGGACACTC | GAGGCTAA |
| Jin5-508.txt | TTGCATGAAA | GAGGACACTC | GAGGCTAA |
| EP6392.txt   | TTGCATGAAA | GAGGACACTC | GAGGCTAA |

Supplementary Figure 3 Alignment of cDNA sequences of the *Csa2M058670.1* from four thick fruit flesh lines (D8, SPD010, DPD010 and SPD110) and four thin fruit flesh cucumber lines (XUE1, Pepino, Jin5-508 and EP6392). The two types of mutations are shaded in yellow and red.



D8\_\_cDNA.txt ATGGCGACTG ACAATCAGCC TTCCTCATCT GATGAAGTGA GGGATGATGA  
SPD010\_cDNA\_.txt ATGGCGACTG ACAATCAGCC TTCCTCATCT GATGAAGTGA GGGATGATGA  
DPD010cDNA.txt ATGGCGACTG ACAATCAGCC TTCCTCATCT GATGAAGTGA GGGATGATGA  
SPD110\_cDNA.txt ATGGCGACTG ACAATCAGCC TTCCTCATCT GATGAAGTGA GGGATGATGA  
XUE1\_cDNA.txt ATGGCGACTG ACAATCAGCC TTCCTCATCT GATGAAGTGA GGGATGATGA  
Pepino\_cDNA.txt ATGGCGACTG ACAATCAGCC TTCCTCATCT GATGAAGTGA GGGATGATGA  
Jin5-508\_cDNA.tx ATGGCGACTG ACAATCAGCC TTCCTCATCT GATGAAGTGA GGGATGATGA  
EP6392\_cDNA.txt ATGGCGACTG ACAATCAGCC TTCCTCATCT GATGAAGTGA GGGATGATGA

D8\_\_cDNA.txt CGGTCGCTTT CTATTTCTTG CATTGGATCG AAATGACCGT CTTTTCGACA  
SPD010\_cDNA\_.txt CGGTCGCTTT CTATTTCTTG CATTGGATCG AAATGACCGT CTTTTCGACA  
DPD010cDNA.txt CGGTCGCTTT CTATTTCTTG CATTGGATCG AAATGACCGT CTTTTCGACA  
SPD110\_cDNA.txt CGGTCGCTTT CTATTTCTTG CATTGGATCG AAATGACCGT CTTTTCGACA  
XUE1\_cDNA.txt CGGTCGCTTT CTATTTCTTG CATTGGATCG AAATGACCGT CTTTTCGACA  
Pepino\_cDNA.txt CGGTCGCTTT CTATTTCTTG CATTGGATCG AAATGACCGT CTTTTCGACA  
Jin5-508\_cDNA.tx CGGTCGCTTT CTATTTCTTG CATTGGATCG AAATGACCGT CTTTTCGACA  
EP6392\_cDNA.txt CGGTCGCTTT CTATTTCTTG CATTGGATCG AAATGACCGT CTTTTCGACA

D8\_\_cDNA.txt AAAAGAAGAA ATTATTAGAA AGACAGGGGT TCAAGTCTGA GAATCTCATT  
SPD010\_cDNA\_.txt AAAAGAAGAA ATTATTAGAA AGACAGGGGT TCAAGTCTGA GAATCTCATT  
DPD010cDNA.txt AAAAGAAGAA ATTATTAGAA AGACAGGGGT TCAAGTCTGA GAATCTCATT  
SPD110\_cDNA.txt AAAAGAAGAA ATTATTAGAA AGACAGGGGT TCAAGTCTGA GAATCTCATT  
XUE1\_cDNA.txt AAAAGAAGAA ATTATTAGAA AGACAGGGGT TCAAGTCTGA GAATCTCATT  
Pepino\_cDNA.txt AAAAGAAGAA ATTATTAGAA AGACAGGGGT TCAAGTCTGA GAATCTCATT  
Jin5-508\_cDNA.tx AAAAGAAGAA ATTATTAGAA AGACAGGGGT TCAAGTCTGA GAATCTCATT  
EP6392\_cDNA.txt AAAAGAAGAA ATTATTAGAA AGACAGGGGT TCAAGTCTGA GAATCTCATT

D8\_\_cDNA.txt TACTTGAAGT GCTCTATGTG TCCTGAGGAA GTAGATACTG TACTGAAAGA  
SPD010\_cDNA\_.txt TACTTGAAGT GCTCTATGTG TCCTGAGGAA GTAGATACTG TACTGAAAGA  
DPD010cDNA.txt TACTTGAAGT GCTCTATGTG TCCTGAGGAA GTAGATACTG TACTGAAAGA  
SPD110\_cDNA.txt TACTTGAAGT GCTCTATGTG TCCTGAGGAA GTAGATACTG TACTGAAAGA  
XUE1\_cDNA.txt TACTTGAAGT GCTCTATGTG TCCTGAGGAA GTAGATACTG TACTGAAAGA  
Pepino\_cDNA.txt TACTTGAAGT GCTCTATGTG TCCTGAGGAA GTAGATACTG TACTGAAAGA  
Jin5-508\_cDNA.tx TACTTGAAGT GCTCTATGTG TCCTGAGGAA GTAGATACTG TACTGAAAGA  
EP6392\_cDNA.txt TACTTGAAGT GCTCTATGTG TCCTGAGGAA GTAGATACTG TACTGAAAGA

D8\_\_cDNA.txt GTTGGTACAA ATATCAAGAA TTATTCACTT AAATGAGCCT GAAATGTATT  
SPD010\_cDNA\_.txt GTTGGTACAA ATATCAAGAA TTATTCACTT AAATGAGCCT GAAATGTATT  
DPD010cDNA.txt GTTGGTACAA ATATCAAGAA TTATTCACTT AAATGAGCCT GAAATGTATT

SPD110\_cDNA.txt GTTGGTACAA ATATCAAGAA TTATTCACTT AAATGAGCCT GAAATGTATT  
XUE1\_cDNA.txt GTTGGTACAA ATATCAAGAA TTATTCACTT AAATGAGCCT GAAATGTATT  
Pepino\_cDNA.txt GTTGGTACAA ATATCAAGAA TTATTCACTT AAATGAGCCT GAAATGTATT  
Jin5-508\_cDNA.tx GTTGGTACAA ATATCAAGAA TTATTCACTT AAATGAGCCT GAAATGTATT  
EP6392\_cDNA.txt GTTGGTACAA ATATCAAGAA TTATTCACTT AAATGAGCCT GAAATGTATT

D8\_\_cDNA.txt TTGGAGAAAA TGACGAAGGT ACACCAGTAG ATTTCTACAG CCCCAGGAAT  
SPD010\_cDNA\_.txt TTGGAGAAAA TGACGAAGGT ACACCAGTAG ATTTCTACAG CCCCAGGAAT  
DPD010cDNA.txt TTGGAGAAAA TGACGAAGGT ACACCAGTAG ATTTCTACAG CCCCAGGAAT  
SPD110\_cDNA.txt TTGGAGAAAA TGACGAAGGT ACACCAGTAG ATTTCTACAG CCCCAGGAAT  
XUE1\_cDNA.txt TTGGAGAAAA TGACGAAGGT ACACCAGTAG ATTTCTACAG CCCCAGGAAT  
Pepino\_cDNA.txt TTGGAGAAAA TGACGAAGGT ACACCAGTAG ATTTCTACAG CCCCAGGAAT  
Jin5-508\_cDNA.tx TTGGAGAAAA TGACGAAGGT ACACCAGTAG ATTTCTACAG CCCCAGGAAT  
EP6392\_cDNA.txt TTGGAGAAAA TGACGAAGGT ACACCAGTAG ATTTCTACAG CCCCAGGAAT

D8\_\_cDNA.txt GAAGTGGAGA CCTTTGATTC AATAATTTCT CTTCTTGACC TCTCTCTCTC  
SPD010\_cDNA\_.txt GAAGTGGAGA CCTTTGATTC AATAATTTCT CTTCTTGACC TCTCTCTCTC  
DPD010cDNA.txt GAAGTGGAGA CCTTTGATTC AATAATTTCT CTTCTTGACC TCTCTCTCTC  
SPD110\_cDNA.txt GAAGTGGAGA CCTTTGATTC AATAATTTCT CTTCTTGACC TCTCTCTCTC  
XUE1\_cDNA.txt GAAGTGGAGA CCTTTGATTC AATAATTTCT CTTCTTGACC TCTCTCTCTC  
Pepino\_cDNA.txt GAAGTGGAGA CCTTTGATTC AATAATTTCT CTTCTTGACC TCTCTCTCTC  
Jin5-508\_cDNA.tx GAAGTGGAGA CCTTTGATTC AATAATTTCT CTTCTTGACC TCTCTCTCTC  
EP6392\_cDNA.txt GAAGTGGAGA CCTTTGATTC AATAATTTCT CTTCTTGACC TCTCTCTCTC

D8\_\_cDNA.txt TAGTTGTACT CCTGCCAAT TCAGTGCCT GCAAGAATTA CGCAAGGCAG  
SPD010\_cDNA\_.txt TAGTTGTACT CCTGCCAAT TCAGTGCCT GCAAGAATTA CGCAAGGCAG  
DPD010cDNA.txt TAGTTGTACT CCTGCCAAT TCAGTGCCT GCAAGAATTA CGCAAGGCAG  
SPD110\_cDNA.txt TAGTTGTACT CCTGCCAAT TCAGTGCCT GCAAGAATTA CGCAAGGCAG  
XUE1\_cDNA.txt TAGTTGTACT CCTGCCAAT TCAGTGCCT GCAAGAATTA CGCAAGGCAG  
Pepino\_cDNA.txt TAGTTGTACT CCTGCCAAT TCAGTGCCT GCAAGAATTA CGCAAGGCAG  
Jin5-508\_cDNA.tx TAGTTGTACT CCTGCCAAT TCAGTGCCT GCAAGAATTA CGCAAGGCAG  
EP6392\_cDNA.txt TAGTTGTACT CCTGCCAAT TCAGTGCCT GCAAGAATTA CGCAAGGCAG

D8\_\_cDNA.txt TTATTCATAT GATCCATGAG TATGGAAATG TACACAGTAT GGTGGCTAAA  
SPD010\_cDNA\_.txt TTATTCATAT GATCCATGAG TATGGAAATG TACACAGTAT GGTGGCTAAA  
DPD010cDNA.txt TTATTCATAT GATCCATGAG TATGGAAATG TACACAGTAT GGTGGCTAAA  
SPD110\_cDNA.txt TTATTCATAT GATCCATGAG TATGGAAATG TACACAGTAT GGTGGCTAAA  
XUE1\_cDNA.txt TTATTCATAT GATCCATGAG TATGGAAATG TACACAGTAT GGTGGCTAAA  
Pepino\_cDNA.txt TTATTCATAT GATCCATGAG TATGGAAATG TACACAGTAT GGTGGCTAAA  
Jin5-508\_cDNA.tx TTATTCATAT GATCCATGAG TATGGAAATG TACACAGTAT GGTGGCTAAA

EP6392\_cDNA.txt TTATTCATAT GATCCATGAG TATGGAAATG TACACAGTAT GGTGGCTAAA

D8\_\_cDNA.txt ACTTTGGAAA ACAGCTGTGA GAAAGGAAAC TGTTTGTTAG AGTGGGGTGA  
SPD010\_cDNA\_.txt ACTTTGGAAA ACAGCTGTGA GAAAGGAAAC TGTTTGTTAG AGTGGGGTGA  
DPD010cDNA.txt ACTTTGGAAA ACAGCTGTGA GAAAGGAAAC TGTTTGTTAG AGTGGGGTGA  
SPD110\_cDNA.txt ACTTTGGAAA ACAGCTGTGA GAAAGGAAAC TGTTTGTTAG AGTGGGGTGA  
XUE1\_cDNA.txt ACTTTGGAAA ACAGCTGTGA GAAAGGAAAC TGTTTGTTAG AGTGGGGTGA  
Pepino\_cDNA.txt ACTTTGGAAA ACAGCTGTGA GAAAGGAAAC TGTTTGTTAG AGTGGGGTGA  
Jin5-508\_cDNA.tx ACTTTGGAAA ACAGCTGTGA GAAAGGAAAC TGTTTGTTAG AGTGGGGTGA  
EP6392\_cDNA.txt ACTTTGGAAA ACAGCTGTGA GAAAGGAAAC TGTTTGTTAG AGTGGGGTGA

D8\_\_cDNA.txt GAGCAATGGT GTTAGAACAA GCTTGAAGAT AGCTTATGTT GAAGGTGCTG  
SPD010\_cDNA\_.txt GAGCAATGGT GTTAGAACAA GCTTGAAGAT AGCTTATGTT GAAGGTGCTG  
DPD010cDNA.txt GAGCAATGGT GTTAGAACAA GCTTGAAGAT AGCTTATGTT GAAGGTGCTG  
SPD110\_cDNA.txt GAGCAATGGT GTTAGAACAA GCTTGAAGAT AGCTTATGTT GAAGGTGCTG  
XUE1\_cDNA.txt GAGCAATGGT GTTAGAACAA GCTTGAAGAT AGCTTATGTT GAAGGTGCTG  
Pepino\_cDNA.txt GAGCAATGGT GTTAGAACAA GCTTGAAGAT AGCTTATGTT GAAGGTGCTG  
Jin5-508\_cDNA.tx GAGCAATGGT GTTAGAACAA GCTTGAAGAT AGCTTATGTT GAAGGTGCTG  
EP6392\_cDNA.txt GAGCAATGGT GTTAGAACAA GCTTGAAGAT AGCTTATGTT GAAGGTGCTG

D8\_\_cDNA.txt GTCGAGGAAC CATAGCCAAA GAAGATTTAG ACGTTGGTGA CACTGTATTG  
SPD010\_cDNA\_.txt GTCGAGGAAC CATAGCCAAA GAAGATTTAG ACGTTGGTGA CACTGTATTG  
DPD010cDNA.txt GTCGAGGAAC CATAGCCAAA GAAGATTTAG ACGTTGGTGA CACTGTATTG  
SPD110\_cDNA.txt GTCGAGGAAC CATAGCCAAA GAAGATTTAG ACGTTGGTGA CACTGTATTG  
XUE1\_cDNA.txt GTCGAGGAAC CATAGCCAAA GAAGATTTAG ACGTTGGTGA CACTGTATTG  
Pepino\_cDNA.txt GTCGAGGAAC CATAGCCAAA GAAGATTTAG ACGTTGGTGA CACTGTATTG  
Jin5-508\_cDNA.tx GTCGAGGAAC CATAGCCAAA GAAGATTTAG ACGTTGGTGA CACTGTATTG  
EP6392\_cDNA.txt GTCGAGGAAC CATAGCCAAA GAAGATTTAG ACGTTGGTGA CACTGTATTG

D8\_\_cDNA.txt GAGATCCCTC TGGCTATTAT TATTTCTGAG GAACTTGTGC AGAAAAGCAC  
SPD010\_cDNA\_.txt GAGATCCCTC TGGCTATTAT TATTTCTGAG GAACTTGTGC AGAAAAGCAC  
DPD010cDNA.txt GAGATCCCTC TGGCTATTAT TATTTCTGAG GAACTTGTGC AGAAAAGCAC  
SPD110\_cDNA.txt GAGATCCCTC TGGCTATTAT TATTTCTGAG GAACTTGTGC AGAAAAGCAC  
XUE1\_cDNA.txt GAGATCCCTC TGGCTATTAT TATTTCTGAG GAACTTGTGC AGAAAAGCAC  
Pepino\_cDNA.txt GAGATCCCTC TGGCTATTAT TATTTCTGAG GAACTTGTGC AGAAAAGCAC  
Jin5-508\_cDNA.tx GAGATCCCTC TGGCTATTAT TATTTCTGAG GAACTTGTGC AGAAAAGCAC  
EP6392\_cDNA.txt GAGATCCCTC TGGCTATTAT TATTTCTGAG GAACTTGTGC AGAAAAGCAC

D8\_\_cDNA.txt CATGTATCCC GTATTATCAA AGGTTGAAGG CATGCTACCT GAGACAATGA

SPD010\_cDNA\_.txt CATGTATCCC GTATTATCAA AGGTTGAAGG CATGCTACCT GAGACAATGA  
DPD010cDNA.txt CATGTATCCC GTATTATCAA AGGTTGAAGG CATGCTACCT GAGACAATGA  
SPD110\_cDNA.txt CATGTATCCC GTATTATCAA AGGTTGAAGG CATGCTACCT GAGACAATGA  
XUE1\_cDNA.txt CATGTATCCC GTATTATCAA AGGTTGAAGG CATGCTACCT GAGACAATGA  
Pepino\_cDNA.txt CATGTATCCC GTATTATCAA AGGTTGAAGG CATGCTACCT GAGACAATGA  
Jin5-508\_cDNA.tx CATGTATCCC GTATTATCAA AGGTTGAAGG CATGCTACCT GAGACAATGA  
EP6392\_cDNA.txt CATGTATCCC GTATTATCAA AGGTTGAAGG CATGCTACCT GAGACAATGA

D8\_\_cDNA.txt CGTTGTTATG GAGTATGAAG GAGAAGCACA TTGTCGATTC CGAATTCAGG  
SPD010\_cDNA\_.txt CGTTGTTATG GAGTATGAAG GAGAAGCACA TTGTCGATTC CGAATTCAGG  
DPD010cDNA.txt CGTTGTTATG GAGTATGAAG GAGAAGCACA TTGTCGATTC CGAATTCAGG  
SPD110\_cDNA.txt CGTTGTTATG GAGTATGAAG GAGAAGCACA TTGTCGATTC CGAATTCAGG  
XUE1\_cDNA.txt CGTTGTTATG GAGTATGAAG GAGAAGCACA TTGTCGATTC CGAATTCAGG  
Pepino\_cDNA.txt CGTTGTTATG GAGTATGAAG GAGAAGCACA TTGTCGATTC CGAATTCAGG  
Jin5-508\_cDNA.tx CGTTGTTATG GAGTATGAAG GAGAAGCACA TTGTCGATTC CGAATTCAGG  
EP6392\_cDNA.txt CGTTGTTATG GAGTATGAAG GAGAAGCACA TTGTCGATTC CGAATTCAGG

D8\_\_cDNA.txt GTCTACTTTG ATACATTACC AGAAGCATTT AATACTGGGT TAAGTTTTGG  
SPD010\_cDNA\_.txt GTCTACTTTG ATACATTACC AGAAGCATTT AATACTGGGT TAAGTTTTGG  
DPD010cDNA.txt GTCTACTTTG ATACATTACC AGAAGCATTT AATACTGGGT TAAGTTTTGG  
SPD110\_cDNA.txt GTCTACTTTG ATACATTACC AGAAGCATTT AATACTGGGT TAAGTTTTGG  
XUE1\_cDNA.txt GTCTACTTTG ATACATTACC AGAAGCATTT AATACTGGGT TAAGTTTTGG  
Pepino\_cDNA.txt GTCTACTTTG ATACATTACC AGAAGCATTT AATACTGGGT TAAGTTTTGG  
Jin5-508\_cDNA.tx GTCTACTTTG ATACATTACC AGAAGCATTT AATACTGGGT TAAGTTTTGG  
EP6392\_cDNA.txt GTCTACTTTG ATACATTACC AGAAGCATTT AATACTGGGT TAAGTTTTGG

D8\_\_cDNA.txt AGTTGGTGCA ATGACAACCT TGGTCGGAAC CCTACTTTTT GATGAGCTAA  
SPD010\_cDNA\_.txt AGTTGGTGCA ATGACAACCT TGGTCGGAAC CCTACTTTTT GATGAGCTAA  
DPD010cDNA.txt AGTTGGTGCA ATGACAACCT TGGTCGGAAC CCTACTTTTT GATGAGCTAA  
SPD110\_cDNA.txt AGTTGGTGCA ATGACAACCT TGGTCGGAAC CCTACTTTTT GATGAGCTAA  
XUE1\_cDNA.txt AGTTGGTGCA ATGACAACCT TGGTCGGAAC CCTACTTTTT GATGAGCTAA  
Pepino\_cDNA.txt AGTTGGTGCA ATGACAACCT TGGTCGGAAC CCTACTTTTT GATGAGCTAA  
Jin5-508\_cDNA.tx AGTTGGTGCA ATGACAACCT TGGTCGGAAC CCTACTTTTT GATGAGCTAA  
EP6392\_cDNA.txt AGTTGGTGCA ATGACAACCT TGGTCGGAAC CCTACTTTTT GATGAGCTAA

D8\_\_cDNA.txt TGCAAGCAAA AGAGCACTTG CGCAAACAAT ACAATGAGTT GTTTCCTGCG  
SPD010\_cDNA\_.txt TGCAAGCAAA AGAGCACTTG CGCAAACAAT ACAATGAGTT GTTTCCTGCG  
DPD010cDNA.txt TGCAAGCAAA AGAGCACTTG CGCAAACAAT ACAATGAGTT GTTTCCTGCG  
SPD110\_cDNA.txt TGCAAGCAAA AGAGCACTTG CGCAAACAAT ACAATGAGTT GTTTCCTGCG  
XUE1\_cDNA.txt TGCAAGCAAA AGAGCACTTG CGCAAACAAT ACAATGAGTT GTTTCCTGCG

Pepino\_cDNA.txt TGCAAGCAAA AGAGCACTTG CGCAAACAAT ACAATGAGTT GTTTCCTGCG  
Jin5-508\_cDNA.tx TGCAAGCAAA AGAGCACTTG CGCAAACAAT ACAATGAGTT GTTTCCTGCG  
EP6392\_cDNA.txt TGCAAGCAAA AGAGCACTTG CGCAAACAAT ACAATGAGTT GTTTCCTGCG

D8\_\_cDNA.txt TTATGTAACA ACCATCCTGA TATCTTTCCA GAGGAGTTCT ACTCATGGGA  
SPD010\_cDNA\_.txt TTATGTAACA ACCATCCTGA TATCTTTCCA GAGGAGTTCT ACTCATGGGA  
DPD010cDNA.txt TTATGTAACA ACCATCCTGA TATCTTTCCA GAGGAGTTCT ACTCATGGGA  
SPD110\_cDNA.txt TTATGTAACA ACCATCCTGA TATCTTTCCA GAGGAGTTCT ACTCATGGGA  
XUE1\_cDNA.txt TTATGTAACA ACCATCCTGA TATCTTTCCA GAGGAGTTCT ACTCATGGGA  
Pepino\_cDNA.txt TTATGTAACA ACCATCCTGA TATCTTTCCA GAGGAGTTCT ACTCATGGGA  
Jin5-508\_cDNA.tx TTATGTAACA ACCATCCTGA TATCTTTCCA GAGGAGTTCT ACTCATGGGA  
EP6392\_cDNA.txt TTATGTAACA ACCATCCTGA TATCTTTCCA GAGGAGTTCT ACTCATGGGA

D8\_\_cDNA.txt GGAGTTCTTA TGGGCTTGTG AACTTTGGTA TTCAAATAGC TTGAAAATCA  
SPD010\_cDNA\_.txt GGAGTTCTTA TGGGCTTGTG AACTTTGGTA TTCAAATAGC TTGAAAATCA  
DPD010cDNA.txt GGAGTTCTTA TGGGCTTGTG AACTTTGGTA TTCAAATAGC TTGAAAATCA  
SPD110\_cDNA.txt GGAGTTCTTA TGGGCTTGTG AACTTTGGTA TTCAAATAGC TTGAAAATCA  
XUE1\_cDNA.txt GGAGTTCTTA TGGGCTTGTG AACTTTGGTA TTCAAATAGC TTGAAAATCA  
Pepino\_cDNA.txt GGAGTTCTTA TGGGCTTGTG AACTTTGGTA TTCAAATAGC TTGAAAATCA  
Jin5-508\_cDNA.tx GGAGTTCTTA TGGGCTTGTG AACTTTGGTA TTCAAATAGC TTGAAAATCA  
EP6392\_cDNA.txt GGAGTTCTTA TGGGCTTGTG AACTTTGGTA TTCAAATAGC TTGAAAATCA

D8\_\_cDNA.txt TGTTCCCTGA TGGAAATGTC AGGACTTGCT TGGTTCCAAT TGCAGGTTTT  
SPD010\_cDNA\_.txt TGTTCCCTGA TGGAAATGTC AGGACTTGCT TGGTTCCAAT TGCAGGTTTT  
DPD010cDNA.txt TGTTCCCTGA TGGAAATGTC AGGACTTGCT TGGTTCCAAT TGCAGGTTTT  
SPD110\_cDNA.txt TGTTCCCTGA TGGAAATGTC AGGACTTGCT TGGTTCCAAT TGCAGGTTTT  
XUE1\_cDNA.txt TGTTCCCTGA TGGAAATGTC AGGACTTGCT TGGTTCCAAT TGCAGGTTTT  
Pepino\_cDNA.txt TGTTCCCTGA TGGAAATGTC AGGACTTGCT TGGTTCCAAT TGCAGGTTTT  
Jin5-508\_cDNA.tx TGTTCCCTGA TGGAAATGTC AGGACTTGCT TGGTTCCAAT TGCAGGTTTT  
EP6392\_cDNA.txt TGTTCCCTGA TGGAAATGTC AGGACTTGCT TGGTTCCAAT TGCAGGTTTT

D8\_\_cDNA.txt CTCAACCACT CGTTGCATCC GCACATACTG CACTATGGCA AAGTTGATTC  
SPD010\_cDNA\_.txt CTCAACCACT CGTTGCATCC GCACATACTG CACTATGGCA AAGTTGATTC  
DPD010cDNA.txt CTCAACCACT CGTTGCATCC GCACATACTG CACTATGGCA AAGTTGATTC  
SPD110\_cDNA.txt CTCAACCACT CGTTGCATCC GCACATACTG CACTATGGCA AAGTTGATTC  
XUE1\_cDNA.txt CTCAACCACT CGTTGCATCC GCACATACTG CACTATGGCA AAGTTGATTC  
Pepino\_cDNA.txt CTCAACCACT CGTTGCATCC GCACATACTG CACTATGGCA AAGTTGATTC  
Jin5-508\_cDNA.tx CTCAACCACT CGTTGCATCC GCACATACTG CACTATGGCA AAGTTGATTC  
EP6392\_cDNA.txt CTCAACCACT CGTTGCATCC GCACATACTG CACTATGGCA AAGTTGATTC

D8\_\_cDNA.txt AGATACAGAT TCCTTGAAAT TCCGTCTATC AAGACCATGC CGTGCAGGAG  
SPD010\_cDNA\_.txt AGATACAGAT TCCTTGAAAT TCCGTCTATC AAGACCATGC CGTGCAGGAG  
DPD010cDNA.txt AGATACAGAT TCCTTGAAAT TCCGTCTATC AAGACCATGC CGTGCAGGAG  
SPD110\_cDNA.txt AGATACAGAT TCCTTGAAAT TCCGTCTATC AAGACCATGC CGTGCAGGAG  
XUE1\_cDNA.txt AGATACAGAT TCCTTGAAAT TCCGTCTATC AAGACCATGC CGTGCAGGAG  
Pepino\_cDNA.txt AGATACAGAT TCCTTGAAAT TCCGTCTATC AAGACCATGC CGTGCAGGAG  
Jin5-508\_cDNA.tx AGATACAGAT TCCTTGAAAT TCCGTCTATC AAGACCATGC CGTGCAGGAG  
EP6392\_cDNA.txt AGATACAGAT TCCTTGAAAT TCCGTCTATC AAGACCATGC CGTGCAGGAG

D8\_\_cDNA.txt AAGAGTGTTA CCTTAGTTAT GGAATTACT CTGGGTCTCA TTTAGTTACT  
SPD010\_cDNA\_.txt AAGAGTGTTA CCTTAGTTAT GGAATTACT CTGGGTCTCA TTTAGTTACT  
DPD010cDNA.txt AAGAGTGTTA CCTTAGTTAT GGAATTACT CTGGGTCTCA TTTAGTTACT  
SPD110\_cDNA.txt AAGAGTGTTA CCTTAGTTAT GGAATTACT CTGGGTCTCA TTTAGTTACT  
XUE1\_cDNA.txt AAGAGTGTTA CCTTAGTTAT GGAATTACT CTGGGTCTCA TTTAGTTACT  
Pepino\_cDNA.txt AAGAGTGTTA CCTTAGTTAT GGAATTACT CTGGGTCTCA TTTAGTTACT  
Jin5-508\_cDNA.tx AAGAGTGTTA CCTTAGTTAT GGAATTACT CTGGGTCTCA TTTAGTTACT  
EP6392\_cDNA.txt AAGAGTGTTA CCTTAGTTAT GGAATTACT CTGGGTCTCA TTTAGTTACT

D8\_\_cDNA.txt TTCTATGGCT TTTTACCTGA AGGAGACAAC GTAAATGATG TTATTCCATT  
SPD010\_cDNA\_.txt TTCTATGGCT TTTTACCTGA AGGAGACAAC GTAAATGATG TTATTCCATT  
DPD010cDNA.txt TTCTATGGCT TTTTACCTGA AGGAGACAAC GTAAATGATG TTATTCCATT  
SPD110\_cDNA.txt TTCTATGGCT TTTTACCTGA AGGAGACAAC GTAAATGATG TTATTCCATT  
XUE1\_cDNA.txt TTCTATGGCT TTTTACCTGA AGGAGACAAC GTAAATGATG TTATTCCATT  
Pepino\_cDNA.txt TTCTATGGCT TTTTACCTGA AGGAGACAAC GTAAATGATG TTATTCCATT  
Jin5-508\_cDNA.tx TTCTATGGCT TTTTACCTGA AGGAGACAAC GTAAATGATG TTATTCCATT  
EP6392\_cDNA.txt TTCTATGGCT TTTTACCTGA AGGAGACAAC GTAAATGATG TTATTCCATT

D8\_\_cDNA.txt AGACATTGAC TTCGGTGATG ATGATAACAA TAACATTACG TCAGACTGGA  
SPD010\_cDNA\_.txt AGACATTGAC TTCGGTGATG ATGATAACAA TAACATTACG TCAGACTGGA  
DPD010cDNA.txt AGACATTGAC TTCGGTGATG ATGATAACAA TAACATTACG TCAGACTGGA  
SPD110\_cDNA.txt AGACATTGAC TTCGGTGATG ATGATAACAA TAACATTACG TCAGACTGGA  
XUE1\_cDNA.txt AGACATTGAC TTCGGTGATG ATGATAACAA TAACATTACG TCAGACTGGA  
Pepino\_cDNA.txt AGACATTGAC TTCGGTGATG ATGATAACAA TAACATTACG TCAGACTGGA  
Jin5-508\_cDNA.tx AGACATTGAC TTCGGTGATG ATGATAACAA TAACATTACG TCAGACTGGA  
EP6392\_cDNA.txt AGACATTGAC TTCGGTGATG ATGATAACAA TAACATTACG TCAGACTGGA

D8\_\_cDNA.txt GTACTCATAT GCTACAGGGA AGCATGGAAG GTGAAATAGA AGTCCTCAAT  
SPD010\_cDNA\_.txt GTACTCATAT GCTACAGGGA AGCATGGAAG GTGAAATAGA AGTCCTCAAT  
DPD010cDNA.txt GTACTCATAT GCTACAGGGA AGCATGGAAG GTGAAATAGA AGTCCTCAAT

SPD110\_cDNA.txt GTACTCATAT GCTACAGGGA AGCATGGAAG GTGAAATAGA AGTCCTCAAT  
XUE1\_cDNA.txt GTACTCATAT GCTACAGGGA AGCATGGAAG GTGAAATAGA AGTCCTCAAT  
Pepino\_cDNA.txt GTACTCATAT GCTACAGGGA AGCATGGAAG GTGAAATAGA AGTCCTCAAT  
Jin5-508\_cDNA.tx GTACTCATAT GCTACAGGGA AGCATGGAAG GTGAAATAGA AGTCCTCAAT  
EP6392\_cDNA.txt GTACTCATAT GCTACAGGGA AGCATGGAAG GTGAAATAGA AGTCCTCAAT

D8\_\_cDNA.txt GAACTCCTCT CGATCTTTTC TGAAATGATG GAAAAACTTG AGGACGAGGA  
SPD010\_cDNA\_.txt GAACTCCTCT CGATCTTTTC TGAAATGATG GAAAAACTTG AGGACGAGGA  
DPD010cDNA.txt GAACTCCTCT CGATCTTTTC TGAAATGATG GAAAAACTTG AGGACGAGGA  
SPD110\_cDNA.txt GAACTCCTCT CGATCTTTTC TGAAATGATG GAAAAACTTG AGGACGAGGA  
XUE1\_cDNA.txt GAACTCCTCT CGATCTTTTC TGAAATGATG GAAAAACTTG AGGACGAGGA  
Pepino\_cDNA.txt GAACTCCTCT CGATCTTTTC TGAAATGATG GAAAAACTTG AGGACGAGGA  
Jin5-508\_cDNA.tx GAACTCCTCT CGATCTTTTC TGAAATGATG GAAAAACTTG AGGACGAGGA  
EP6392\_cDNA.txt GAACTCCTCT CGATCTTTTC TGAAATGATG GAAAAACTTG AGGACGAGGA

D8\_\_cDNA.txt TGAGGATGAA AGCCGGACAA GTACAGAATG GGATATAAAG TTAGCACTGG  
SPD010\_cDNA\_.txt TGAGGATGAA AGCCGGACAA GTACAGAATG GGATATAAAG TTAGCACTGG  
DPD010cDNA.txt TGAGGATGAA AGCCGGACAA GTACAGAATG GGATATAAAG TTAGCACTGG  
SPD110\_cDNA.txt TGAGGATGAA AGCCGGACAA GTACAGAATG GGATATAAAG TTAGCACTGG  
XUE1\_cDNA.txt TGAGGATGAA AGCCGGACAA GTACAGAATG GGATATAAAG TTAGCACTGG  
Pepino\_cDNA.txt TGAGGATGAA AGCCGGACAA GTACAGAATG GGATATAAAG TTAGCACTGG  
Jin5-508\_cDNA.tx TGAGGATGAA AGCCGGACAA GTACAGAATG GGATATAAAG TTAGCACTGG  
EP6392\_cDNA.txt TGAGGATGAA AGCCGGACAA GTACAGAATG GGATATAAAG TTAGCACTGG

D8\_\_cDNA.txt AGTACAAAGA TCTACAAAGG AAGATAGTTT CCTCATGTCT GACTTCATGT  
SPD010\_cDNA\_.txt AGTACAAAGA TCTACAAAGG AAGATAGTTT CCTCATGTCT GACTTCATGT  
DPD010cDNA.txt AGTACAAAGA TCTACAAAGG AAGATAGTTT CCTCATGTCT GACTTCATGT  
SPD110\_cDNA.txt AGTACAAAGA TCTACAAAGG AAGATAGTTT CCTCATGTCT GACTTCATGT  
XUE1\_cDNA.txt AGTACAAAGA TCTACAAAGG AAGATAGTTT CCTCATGTCT GACTTCATGT  
Pepino\_cDNA.txt AGTACAAAGA TCTACAAAGG AAGATAGTTT CCTCATGTCT GACTTCATGT  
Jin5-508\_cDNA.tx AGTACAAAGA TCTACAAAGG AAGATAGTTT CCTCATGTCT GACTTCATGT  
EP6392\_cDNA.txt AGTACAAAGA TCTACAAAGG AAGATAGTTT CCTCATGTCT GACTTCATGT

D8\_\_cDNA.txt CATTCTGGTC TCAAGATGGT GGAAATTGCA TTATGCGATT GCATGAAAGA  
SPD010\_cDNA\_.txt CATTCTGGTC TCAAGATGGT GGAAATTGCA TTATGCGATT GCATGAAAGA  
DPD010cDNA.txt CATTCTGGTC TCAAGATGGT GGAAATTGCA TTATGCGATT GCATGAAAGA  
SPD110\_cDNA.txt CATTCTGGTC TCAAGATGGT GGAAATTGCA TTATGCGATT GCATGAAAGA  
XUE1\_cDNA.txt CATTCTGGTC TCAAGATGGT GGAAATTGCA TTATGCGATT GCATGAAAGA  
Pepino\_cDNA.txt CATTCTGGTC TCAAGATGGT GGAAATTGCA TTATGCGATT GCATGAAAGA  
Jin5-508\_cDNA.tx CATTCTGGTC TCAAGATGGT GGAAATTGCA TTATGCGATT GCATGAAAGA

EP6392\_cDNA.txt CATTCTGGTC TCAAGATGGT GGAAATTGCA TTATGCGATT GCATGAAAGA

D8\_cDNA.txt GGACTCTCGA GGCTAA  
SPD010\_cDNA.txt GGACTCTCGA GGCTAA  
DPD010cDNA.txt GGACTCTCGA GGCTAA  
SPD110\_cDNA.txt GGACTCTCGA GGCTAA  
XUE1\_cDNA.txt GGACTCTCGA GGCTAA  
Pepino\_cDNA.txt GGACTCTCGA GGCTAA  
Jin5-508\_cDNA.tx GGACTCTCGA GGCTAA  
EP6392\_cDNA.txt GGACTCTCGA GGCTAA

Supplementary Figure 4 Alignment of the 1.5k-bp promoter sequences of the *Csa2M058670.1* from four thick fruit flesh lines (D8, SPD010, DPD010 and SPD110) and four thin fruit flesh lines (XUE1, Pepino, Jin5-508 and EP6392). The two types of mutations are shaded in yellow and red. Multiple sequence alignment was done by DNAMAN software.

D8\_promter TTTTTTTTTT GTTTTTTAAA TGTTCCGTCA ACAATTATAT ATCACTATAT  
SPD010\_promter TTTTTTTTTT GTTTTTTAAA TGTTCCGTCA ACAATTATAT ATCACTATAT  
DPD010\_promter TTTTTTTTTT GTTTTTTAAA TGTTCCGTCA ACAATTATAT ATCACTATAT  
SPD110\_promter TTTTTTTTTT GTTTTTTAAA TGTTCCGTCA ACAATTATAT ATCACTATAT  
XUE1\_promter TTTTTTTTTT GTTTTTTAAA TGTTCCGTCA ACAATTATAT ATCACTATAT  
Pepino\_promter TTTTTTTTTT GTTTTTTAAA TGTTCCGTCA ACAATTATAT ATCACTATAT  
Jin5-508\_promter TTTTTTTTTT GTTTTTTAAA TGTTCCGTCA ACAATTATAT ATCACTATAT  
EP6392\_promter TTTTTTTTTT GTTTTTTAAA TGTTCCGTCA ACAATTATAT ATCACTATAT

D8\_promter TATCTAATTA TTTTATGTAA TATATTATAT ATATACATCT ACACATTTTT  
SPD010\_promter TATCTAATTA TTTTATGTAA TATATTATAT ATATACATCT ACACATTTTT  
DPD010\_promter TATCTAATTA TTTTATGTAA TATATTATAT ATATACATCT ACACATTTTT  
SPD110\_promter TATCTAATTA TTTTATGTAA TATATTATAT ATATACATCT ACACATTTTT  
XUE1\_promter TATCTAATTA TTTTATGTAA TATATTATAT ATATACATCT ACACATTTTT  
Pepino\_promter TATCTAATTA TTTTATGTAA TATATTATAT ATATACATCT ACACATTTTT  
Jin5-508\_promter TATCTAATTA TTTTATGTAA TATATTATAT ATATACATCT ACACATTTTT  
EP6392\_promter TATCTAATTA TTTTATGTAA TATATTATAT ATATACATCT ACACATTTTT

D8\_promter AATAATATAT AAGTTATTAT TGATTGTAAG GGCATATTCG TTTTATTAGA  
SPD010\_promter AATAATATAT AAGTTATTAT TGATTGTAAG GGCATATTCG TTTTATTAGA



DPD010\_promter AATAATATAT AAGTTATTAT TGATTGTAAG GGCATATTCG TTTTATTAGA  
SPD110\_promter AATAATATAT AAGTTATTAT TGATTGTAAG GGCATATTCG TTTTATTAGA  
XUE1\_promter AATAATATAT AAGTTATTAT TGATTGTAAG GGCATATTCG TTTTATTAGA  
Pepino\_promter AATAATATAT AAGTTATTAT TGATTGTAAG GGCATATTCG TTTTATTAGA  
Jin5-508\_promter AATAATATAT AAGTTATTAT TGATTGTAAG GGCATATTCG TTTTATTAGA  
EP6392\_promter AATAATATAT AAGTTATTAT TGATTGTAAG GGCATATTCG TTTTATTAGA

D8\_promter TGTGTGTCCA AATTTTCATA CATTGTTAGG CCAATTAGCA ATTTTAATTT  
SPD010\_promter TGTGTGTCCA AATTTTCATA CATTGTTAGG CCAATTAGCA ATTTTAATTT  
DPD010\_promter TGTGTGTCCA AATTTTCATA CATTGTTAGG CCAATTAGCA ATTTTAATTT  
SPD110\_promter TGTGTGTCCA AATTTTCATA CATTGTTAGG CCAATTAGCA ATTTTAATTT  
XUE1\_promter TGTGTGTCCA AATTTTCATA CATTGTTAGG CCAATTAGCA ATTTTAATTT  
Pepino\_promter TGTGTGTCCA AATTTTCATA CATTGTTAGG CCAATTAGCA ATTTTAATTT  
Jin5-508\_promter TGTGTGTCCA AATTTTCATA CATTGTTAGG CCAATTAGCA ATTTTAATTT  
EP6392\_promter TGTGTGTCCA AATTTTCATA CATTGTTAGG CCAATTAGCA ATTTTAATTT

D8\_promter AATTGCAACC ATTTGAGGAA TATGTATCCT TATAGTCAAT ACCAAATCTT  
SPD010\_promter AATTGCAACC ATTTGAGGAA TATGTATCCT TATAGTCAAT ACCAAATCTT  
DPD010\_promter AATTGCAACC ATTTGAGGAA TATGTATCCT TATAGTCAAT ACCAAATCTT  
SPD110\_promter AATTGCAACC ATTTGAGGAA TATGTATCCT TATAGTCAAT ACCAAATCTT  
XUE1\_promter AATTGCAACC ATTTGAGGAA TATGTATCCT TATAGTCAAT ACCAAATCTT  
Pepino\_promter AATTGCAACC ATTTGAGGAA TATGTATCCT TATAGTCAAT ACCAAATCTT  
Jin5-508\_promter AATTGCAACC ATTTGAGGAA TATGTATCCT TATAGTCAAT ACCAAATCTT  
EP6392\_promter AATTGCAACC ATTTGAGGAA TATGTATCCT TATAGTCAAT ACCAAATCTT

D8\_promter TGTGAAAAAA AACTATGCAA CTAATTTTGC TTTATATCTA GTAATCTCAT  
SPD010\_promter TGTGAAAAAA AACTATGCAA CTAATTTTGC TTTATATCTA GTAATCTCAT  
DPD010\_promter TGTGAAAAAA AACTATGCAA CTAATTTTGC TTTATATCTA GTAATCTCAT  
SPD110\_promter TGTGAAAAAA AACTATGCAA CTAATTTTGC TTTATATCTA GTAATCTCAT  
XUE1\_promter TGTGAAAAAA AACTATGCAA CTAATTTTGC TTTATATCTA GTAATCTCAT  
Pepino\_promter TGTGAAAAAA AACTATGCAA CTAATTTTGC TTTATATCTA GTAATCTCAT  
Jin5-508\_promter TGTGAAAAAA AACTATGCAA CTAATTTTGC TTTATATCTA GTAATCTCAT  
EP6392\_promter TGTGAAAAAA AACTATGCAA CTAATTTTGC TTTATATCTA GTAATCTCAT

D8\_promter TATTTTTATT TTTTATTTAC ACAAATACTC ATTTATATCC CACAAGTTTG  
SPD010\_promter TATTTTTATT TTTTATTTAC ACAAATACTC ATTTATATCC CACAAGTTTG  
DPD010\_promter TATTTTTATT TTTTATTTAC ACAAATACTC ATTTATATCC CACAAGTTTG  
SPD110\_promter TATTTTTATT TTTTATTTAC ACAAATACTC ATTTATATCC CACAAGTTTG  
XUE1\_promter TATTTTTATT TTTTATTTAC ACAAATACTC ATTTATATCC CACAAGTTTG  
Pepino\_promter TATTTTTATT TTTTATTTAC ACAAATACTC ATTTATATCC CACAAGTTTG

Jin5-508\_promter TATTTTTATT TTTTATTTAC ACAAATACTC ATTTATATCC CACAAGTTTG  
EP6392\_promter TATTTTTATT TTTTATTTAC ACAAATACTC ATTTATATCC CACAAGTTTG

D8\_promter ACATCTTTTA GTGTTTAGAC TACCGGTCCA AAAACTTGAC TTTTGGAAAG  
SPD010\_promter ACATCTTTTA GTGTTTAGAC TACCGGTCCA AAAACTTGAC TTTTGGAAAG  
DPD010\_promter ACATCTTTTA GTGTTTAGAC TACCGGTCCA AAAACTTGAC TTTTGGAAAG  
SPD110\_promter ACATCTTTTA GTGTTTAGAC TACCGGTCCA AAAACTTGAC TTTTGGAAAG  
XUE1\_promter ACATCTTTTA GTGTTTAGAC TACCGGTCCA AAAACTTGAC TTTTGGAAAG  
Pepino\_promter ACATCTTTTA GTGTTTAGAC TACCGGTCCA AAAACTTGAC TTTTGGAAAG  
Jin5-508\_promter ACATCTTTTA GTGTTTAGAC TACCGGTCCA AAAACTTGAC TTTTGGAAAG  
EP6392\_promter ACATCTTTTA GTGTTTAGAC TACCGGTCCA AAAACTTGAC TTTTGGAAAG

D8\_promter TGAGTTTAAT TATGCTTTTT TTGTTCTTTT CACAAATACC ACTTTTTTTC  
SPD010\_promter TGAGTTTAAT TATGCTTTTT TTGTTCTTTT CACAAATACC ACTTTTTTTC  
DPD010\_promter TGAGTTTAAT TATGCTTTTT TTGTTCTTTT CACAAATACC ACTTTTTTTC  
SPD110\_promter TGAGTTTAAT TATGCTTTTT TTGTTCTTTT CACAAATACC ACTTTTTTTC  
XUE1\_promter TGAGTTTAAT TATGCTTTTT TTGTTCTTTT CACAAATACC ACTTTTTTTC  
Pepino\_promter TGAGTTTAAT TATGCTTTTT TTGTTCTTTT CACAAATACC ACTTTTTTTC  
Jin5-508\_promter TGAGTTTAAT TATGCTTTTT TTGTTCTTTT CACAAATACC ACTTTTTTTC  
EP6392\_promter TGAGTTTAAT TATGCTTTTT TTGTTCTTTT CACAAATACC ACTTTTTTTC

D8\_promter TCTATCGACA CTCTTCAAGA AATGTTGGTT TGGGATCCTC ATTTTCAGAT  
SPD010\_promter TCTATCGACA CTCTTCAAGA AATGTTGGTT TGGGATCCTC ATTTTCAGAT  
DPD010\_promter TCTATCGACA CTCTTCAAGA AATGTTGGTT TGGGATCCTC ATTTTCAGAT  
SPD110\_promter TCTATCGACA CTCTTCAAGA AATGTTGGTT TGGGATCCTC ATTTTCAGAT  
XUE1\_promter TCTATCGACA CTCTTCAAGA AATGTTGGTT TGGGATCCTC ATTTTCAGAT  
Pepino\_promter TCTATCGACA CTCTTCAAGA AATGTTGGTT TGGGATCCTC ATTTTCAGAT  
Jin5-508\_promter TCTATCGACA CTCTTCAAGA AATGTTGGTT TGGGATCCTC ATTTTCAGAT  
EP6392\_promter TCTATCGACA CTCTTCAAGA AATGTTGGTT TGGGATCCTC ATTTTCAGAT

D8\_promter ATAATATCAA CAACAACATT ATATGCAAAA ATGTTATCAA CAACTACATT  
SPD010\_promter ATAATATCAA CAACAACATT ATATGCAAAA ATGTTATCAA CAACTACATT  
DPD010\_promter ATAATATCAA CAACAACATT ATATGCAAAA ATGTTATCAA CAACTACATT  
SPD110\_promter ATAATATCAA CAACAACATT ATATGCAAAA ATGTTATCAA CAACTACATT  
XUE1\_promter ATAATATCAA CAACAACATT ATATGCAAAA ATGTTATCAA CAACTACATT  
Pepino\_promter ATAATATCAA CAACAACATT ATATGCAAAA ATGTTATCAA CAACTACATT  
Jin5-508\_promter ATAATATCAA CAACAACATT ATATGCAAAA ATGTTATCAA CAACTACATT  
EP6392\_promter ATAATATCAA CAACAACATT ATATGCAAAA ATGTTATCAA CAACTACATT

D8\_promter AGTTATG TTC CATATAT TTC CTATCATGAT ATAGTTTATC GAAATCTCAT  
SPD010\_promter AGTTATG TTC CATATAT TTC CTATCATGAT ATAGTTTATC GAAATCTCAT  
DPD010\_promter AGTTATG TTC CATATAT TTC CTATCATGAT ATAGTTTATC GAAATCTCAT  
SPD110\_promter AGTTATG TTC CATATAT TTC CTATCATGAT ATAGTTTATC GAAATCTCAT  
XUE1\_promter AGTTATG TTC CATATAT TTC CTATCATGAT ATAGTTTATC GAAATCTCAT  
Pepino\_promter AGTTATG TTC CATATAT TTC CTATCATGAT ATAGTTTATC GAAATCTCAT  
Jin5-508\_promter AGTTATG TTC CATATAT TTC CTATCATGAT ATAGTTTATC GAAATCTCAT  
EP6392\_promter AGTTATG TTC CATATAT TTC CTATCATGAT ATAGTTTATC GAAATCTCAT

D8\_promter TATTATCCTT AGTTGTTTTA TCTTTTTCAA TAGTCTTGTC AAAAGTCAAA  
SPD010\_promter TATTATCCTT AGTTGTTTTA TCTTTTTCAA TAGTCTTGTC AAAAGTCAAA  
DPD010\_promter TATTATCCTT AGTTGTTTTA TCTTTTTCAA TAGTCTTGTC AAAAGTCAAA  
SPD110\_promter TATTATCCTT AGTTGTTTTA TCTTTTTCAA TAGTCTTGTC AAAAGTCAAA  
XUE1\_promter TATTATCCTT AGTTGTTTTA TCTTTTTCAA TAGTCTTGTC AAAAGTCAAA  
Pepino\_promter TATTATCCTT AGTTGTTTTA TCTTTTTCAA TAGTCTTGTC AAAAGTCAAA  
Jin5-508\_promter TATTATCCTT AGTTGTTTTA TCTTTTTCAA TAGTCTTGTC AAAAGTCAAA  
EP6392\_promter TATTATCCTT AGTTGTTTTA TCTTTTTCAA TAGTCTTGTC AAAAGTCAAA

D8\_promter TTTTGGGTTT CTTCTGCAAT ATCCATATTC TTTTTCGATG ATTTTTATCT  
SPD010\_promter TTTTGGGTTT CTTCTGCAAT ATCCATATTC TTTTTCGATG ATTTTTATCT  
DPD010\_promter TTTTGGGTTT CTTCTGCAAT ATCCATATTC TTTTTCGATG ATTTTTATCT  
SPD110\_promter TTTTGGGTTT CTTCTGCAAT ATCCATATTC TTTTTCGATG ATTTTTATCT  
XUE1\_promter TTTTGGGTTT CTTCTGCAAT ATCCATATTC TTTTTCGATG ATTTTTATCT  
Pepino\_promter TTTTGGGTTT CTTCTGCAAT ATCCATATTC TTTTTCGATG ATTTTTATCT  
Jin5-508\_promter TTTTGGGTTT CTTCTGCAAT ATCCATATTC TTTTTCGATG ATTTTTATCT  
EP6392\_promter TTTTGGGTTT CTTCTGCAAT ATCCATATTC TTTTTCGATG ATTTTTATCT

D8\_promter TTGAAATTCA TTGGTCTACC GCTTATAGCG TGTTCCAGAT TCATGAACGA  
SPD010\_promter TTGAAATTCA TTGGTCTACC GCTTATAGCG TGTTCCAGAT TCATGAACGA  
DPD010\_promter TTGAAATTCA TTGGTCTACC GCTTATAGCG TGTTCCAGAT TCATGAACGA  
SPD110\_promter TTGAAATTCA TTGGTCTACC GCTTATAGCG TGTTCCAGAT TCATGAACGA  
XUE1\_promter TTGAAATTCA TTGGTCTACC GCTTATAGCG TGTTCCAGAT TCATGAACGA  
Pepino\_promter TTGAAATTCA TTGGTCTACC GCTTATAGCG TGTTCCAGAT TCATGAACGA  
Jin5-508\_promter TTGAAATTCA TTGGTCTACC GCTTATAGCG TGTTCCAGAT TCATGAACGA  
EP6392\_promter TTGAAATTCA TTGGTCTACC GCTTATAGCG TGTTCCAGAT TCATGAACGA

D8\_promter CAACTTATTG TGTTGGGATA TCAATTATTT GTGGAACATT TGTAGCTGCT  
SPD010\_promter CAACTTATTG TGTTGGGATA TCAATTATTT GTGGAACATT TGTAGCTGCT  
DPD010\_promter CAACTTATTG TGTTGGGATA TCAATTATTT GTGGAACATT TGTAGCTGCT  
SPD110\_promter CAACTTATTG TGTTGGGATA TCAATTATTT GTGGAACATT TGTAGCTGCT

XUE1\_promter CAACTTATTG TGTTGGGATA TCAATTATTT GTGGAACATT TGTAGCTGCT  
Pepino\_promter CAACTTATTG TGTTGGGATA TCAATTATTT GTGGAACATT TGTAGCTGCT  
Jin5-508\_promter CAACTTATTG TGTTGGGATA TCAATTATTT GTGGAACATT TGTAGCTGCT  
EP6392\_promter CAACTTATTG TGTTGGGATA TCAATTATTT GTGGAACATT TGTAGCTGCT

D8\_promter AAATGTGATT TGGTTACTTT CTTTGCATCC ACAAATGCAC GTTTTTCTAT  
SPD010\_promter AAATGTGATT TGGTTACTTT CTTTGCATCC ACAAATGCAC GTTTTTCTAT  
DPD010\_promter AAATGTGATT TGGTTACTTT CTTTGCATCC ACAAATGCAC GTTTTTCTAT  
SPD110\_promter AAATGTGATT TGGTTACTTT CTTTGCATCC ACAAATGCAC GTTTTTCTAT  
XUE1\_promter AAATGTGATT TGGTTACTTT CTTTGCATCC ACAAATGCAC GTTTTTCTAT  
Pepino\_promter AAATGTGATT TGGTTACTTT CTTTGCATCC ACAAATGCAC GTTTTTCTAT  
Jin5-508\_promter AAATGTGATT TGGTTACTTT CTTTGCATCC ACAAATGCAC GTTTTTCTAT  
EP6392\_promter AAATGTGATT TGGTTACTTT CTTTGCATCC ACAAATGCAC GTTTTTCTAT

D8\_promter ATTGACAAAT GAATTATTTT TTTAACTTCA AGTTCACATT GATCTCTACG  
SPD010\_promter ATTGACAAAT GAATTATTTT TTTAACTTCA AGTTCACATT GATCTCTACG  
DPD010\_promter ATTGACAAAT GAATTATTTT TTTAACTTCA AGTTCACATT GATCTCTACG  
SPD110\_promter ATTGACAAAT GAATTATTTT TTTAACTTCA AGTTCACATT GATCTCTACG  
XUE1\_promter ATTGACAAAT GAATTATTTT TTTAACTTCA AGTTCACATT GATCTCTACG  
Pepino\_promter ATTGACAAAT GAATTATTTT TTTAACTTCA AGTTCACATT GATCTCTACG  
Jin5-508\_promter ATTGACAAAT GAATTATTTT TTTAACTTCA AGTTCACATT GATCTCTACG  
EP6392\_promter ATTGACAAAT GAATTATTTT TTTAACTTCA AGTTCACATT GATCTCTACG

D8\_promter AAGATCTAAA TAAGACCCAA AAATTGGAAT CAAAATATAT TTCTTTTGCA  
SPD010\_promter AAGATCTAAA TAAGACCCAA AAATTGGAAT CAAAATATAT TTCTTTTGCA  
DPD010\_promter AAGATCTAAA TAAGACCCAA AAATTGGAAT CAAAATATAT TTCTTTTGCA  
SPD110\_promter AAGATCTAAA TAAGACCCAA AAATTGGAAT CAAAATATAT TTCTTTTGCA  
XUE1\_promter AAGATCTAAA TAAGACCCAA AAATTGGAAT CAAAATATAT TTCTTTTGCA  
Pepino\_promter AAGATCTAAA TAAGACCCAA AAATTGGAAT CAAAATATAT TTCTTTTGCA  
Jin5-508\_promter AAGATCTAAA TAAGACCCAA AAATTGGAAT CAAAATATAT TTCTTTTGCA  
EP6392\_promter AAGATCTAAA TAAGACCCAA AAATTGGAAT CAAAATATAT TTCTTTTGCA

D8\_promter TTACGGGATA AATAAAAAAA AAAAGGAGAT GTTCTAACTA ATTTTTAATT  
SPD010\_promter TTACGGGATA AATAAAAAAA AAAAGGAGAT GTTCTAACTA ATTTTTAATT  
DPD010\_promter TTACGGGATA AATAAAAAAA AAAAGGAGAT GTTCTAACTA ATTTTTAATT  
SPD110\_promter TTACGGGATA AATAAAAAAA AAAAGGAGAT GTTCTAACTA ATTTTTAATT  
XUE1\_promter TTACGGGATA AA-----AAAA AAAAGGAGAT GTTCTAACTA ATTTTTAATT  
Pepino\_promter TTACGGGATA AA-----AAAA AAAAGGAGAT GTTCTAACTA ATTTTTAATT  
Jin5-508\_promter TTACGGGATA AA-----AAAA AAAAGGAGAT GTTCTAACTA ATTTTTAATT  
EP6392\_promter TTACGGGATA AA-----AAAA AAAAGGAGAT GTTCTAACTA ATTTTTAATT

D8\_promter ATATTTCTTT TACGAACGGA TAACTAATTT GGTAAGATTT CTACTAATTA  
SPD010\_promter ATATTTCTTT TACGAACGGA TAACTAATTT GGTAAGATTT CTACTAATTA  
DPD010\_promter ATATTTCTTT TACGAACGGA TAACTAATTT GGTAAGATTT CTACTAATTA  
SPD110\_promter ATATTTCTTT TACGAACGGA TAACTAATTT GGTAAGATTT CTACTAATTA  
XUE1\_promter ATATTTCTTT TACGAACGGA TAACTAATTT GGTAAGATTT CTACTAATTA  
Pepino\_promter ATATTTCTTT TACGAACGGA TAACTAATTT GGTAAGATTT CTACTAATTA  
Jin5-508\_promter ATATTTCTTT TACGAACGGA TAACTAATTT GGTAAGATTT CTACTAATTA  
EP6392\_promter ATATTTCTTT TACGAACGGA TAACTAATTT GGTAAGATTT CTACTAATTA

D8\_promter TTTCTGCCTG AATATGAAAA CTTATGAAGA TGTGTTTGTC TAATGTTGCT  
SPD010\_promter TTTCTGCCTG AATATGAAAA CTTATGAAGA TGTGTTTGTC TAATGTTGCT  
DPD010\_promter TTTCTGCCTG AATATGAAAA CTTATGAAGA TGTGTTTGTC TAATGTTGCT  
SPD110\_promter TTTCTGCCTG AATATGAAAA CTTATGAAGA TGTGTTTGTC TAATGTTGCT  
XUE1\_promter TTTCTGCCTG AATATGAAAA CTTATGAAGA TGTGTTTGTC TAATGTTGCT  
Pepino\_promter TTTCTGCCTG AATATGAAAA CTTATGAAGA TGTGTTTGTC TAATGTTGCT  
Jin5-508\_promter TTTCTGCCTG AATATGAAAA CTTATGAAGA TGTGTTTGTC TAATGTTGCT  
EP6392\_promter TTTCTGCCTG AATATGAAAA CTTATGAAGA TGTGTTTGTC TAATGTTGCT

D8\_promter CAAATAATAG AGACCAATTT TACAACCTTA CCTAAAAAAA GAAGTAACTG  
SPD010\_promter CAAATAATAG AGACCAATTT TACAACCTTA CCTAAAAAAA GAAGTAACTG  
DPD010\_promter CAAATAATAG AGACCAATTT TACAACCTTA CCTAAAAAAA GAAGTAACTG  
SPD110\_promter CAAATAATAG AGACCAATTT TACAACCTTA CCTAAAAAAA GAAGTAACTG  
XUE1\_promter CAAATAATAG AGACCAATTT TACAACCTTA CCTAAAAAAA GAAGTAACTG  
Pepino\_promter CAAATAATAG AGACCAATTT TACAACCTTA CCTAAAAAAA GAAGTAACTG  
Jin5-508\_promter CAAATAATAG AGACCAATTT TACAACCTTA CCTAAAAAAA GAAGTAACTG  
EP6392\_promter CAAATAATAG AGACCAATTT TACAACCTTA CCTAAAAAAA GAAGTAACTG

D8\_promter TAAGTAATAA AACGACCAAA AATACTTACA AATATAAATA GTAAAATGTG  
SPD010\_promter TAAGTAATAA AACGACCAAA AATACTTACA AATATAAATA GTAAAATGTG  
DPD010\_promter TAAGTAATAA AACGACCAAA AATACTTACA AATATAAATA GTAAAATGTG  
SPD110\_promter TAAGTAATAA AACGACCAAA AATACTTACA AATATAAATA GTAAAATGTG  
XUE1\_promter TAAGTAATAA AACGACCAAA AATACTTACA AATATAAATA GTAAAATGTG  
Pepino\_promter TAAGTAATAA AACGACCAAA AATACTTACA AATATAAATA GTAAAATGTG  
Jin5-508\_promter TAAGTAATAA AACGACCAAA AATACTTACA AATATAAATA GTAAAATGTG  
EP6392\_promter TAAGTAATAA AACGACCAAA AATACTTACA AATATAAATA GTAAAATGTG

D8\_promter AGAAAACAT CATATGTGTT TGAACCACAC GAATAATAAT GTATTGTGGT  
SPD010\_promter AGAAAACAT CATATGTGTT TGAACCACAC GAATAATAAT GTATTGTGGT

DPD010\_promter AGAAAACATAT CATATGTGTT TGAACCACAC GAATAATAAT GTATTGTGGT  
SPD110\_promter AGAAAACATAT CATATGTGTT TGAACCACAC GAATAATAAT GTATTGTGGT  
XUE1\_promter AGAAAACATAT CATATGTGTT TGAACCACAC GAATAATAAT GTATTGTGGT  
Pepino\_promter AGAAAACATAT CATATGTGTT TGAACCACAC GAATAATAAT GTATTGTGGT  
Jin5-508\_promter AGAAAACATAT CATATGTGTT TGAACCACAC GAATAATAAT GTATTGTGGT  
EP6392\_promter AGAAAACATAT CATATGTGTT TGAACCACAC GAATAATAAT GTATTGTGGT

D8\_promter CTGTTTGTAC TCTTAAGAAA GAGAACTCAA AGGCCAAAGG GTTAATTTGA  
SPD010\_promter CTGTTTGTAC TCTTAAGAAA GAGAACTCAA AGGCCAAAGG GTTAATTTGA  
DPD010\_promter CTGTTTGTAC TCTTAAGAAA GAGAACTCAA AGGCCAAAGG GTTAATTTGA  
SPD110\_promter CTGTTTGTAC TCTTAAGAAA GAGAACTCAA AGGCCAAAGG GTTAATTTGA  
XUE1\_promter CTGTTTGTAC TCTTAAGAAA GAGAACTCAA AGGCCAAAGG GTTAATTTGA  
Pepino\_promter CTGTTTGTAC TCTTAAGAAA GAGAACTCAA AGGCCAAAGG GTTAATTTGA  
Jin5-508\_promter CTGTTTGTAC TCTTAAGAAA GAGAACTCAA AGGCCAAAGG GTTAATTTGA  
EP6392\_promter CTGTTTGTAC TCTTAAGAAA GAGAACTCAA AGGCCAAAGG GTTAATTTGA

D8\_promter AACTTGAAGG ATCAACTGCA CATATTTTATG AAAACTCTTA GTACTAAAAA  
SPD010\_promter AACTTGAAGG ATCAACTGCA CATATTTTATG AAAACTCTTA GTACTAAAAA  
DPD010\_promter AACTTGAAGG ATCAACTGCA CATATTTTATG AAAACTCTTA GTACTAAAAA  
SPD110\_promter AACTTGAAGG ATCAACTGCA CATATTTTATG AAAACTCTTA GTACTAAAAA  
XUE1\_promter AACTTGAAGG ATCAACTGCA CATATTTTATG AAAACTCTTA GTACTAAAAA  
Pepino\_promter AACTTGAAGG ATCAACTGCA CATATTTTATG AAAACTCTTA GTACTAAAAA  
Jin5-508\_promter AACTTGAAGG ATCAACTGCA CATATTTTATG AAAACTCTTA GTACTAAAAA  
EP6392\_promter AACTTGAAGG ATCAACTGCA CATATTTTATG AAAACTCTTA GTACTAAAAA

D8\_promter AAATGTTGAA GTGAAATTAT ACTCTACAAA ATTTCCCATG AAATGCGTAG  
SPD010\_promter AAATGTTGAA GTGAAATTAT ACTCTACAAA ATTTCCCATG AAATGCGTAG  
DPD010\_promter AAATGTTGAA GTGAAATTAT ACTCTACAAA ATTTCCCATG AAATGCGTAG  
SPD110\_promter AAATGTTGAA GTGAAATTAT ACTCTACAAA ATTTCCCATG AAATGCGTAG  
XUE1\_promter AAATGTTGAA GTGAAATTAT ACTCTACAAA ATTTCCCATG AAATGCGTAG  
Pepino\_promter AAATGTTGAA GTGAAATTAT ACTCTACAAA ATTTCCCATG AAATGCGTAG  
Jin5-508\_promter AAATGTTGAA GTGAAATTAT ACTCTACAAA ATTTCCCATG AAATGCGTAG  
EP6392\_promter AAATGTTGAA GTGAAATTAT ACTCTACAAA ATTTCCCATG AAATGCGTAG

D8\_promter AGAGCTTTAA ATAAGTTTCT TCTACAAATT CTGCCGCTCA AATTCCACTC  
SPD010\_promter AGAGCTTTAA ATAAGTTTCT TCTACAAATT CTGCCGCTCA AATTCCACTC  
DPD010\_promter AGAGCTTTAA ATAAGTTTCT TCTACAAATT CTGCCGCTCA AATTCCACTC  
SPD110\_promter AGAGCTTTAA ATAAGTTTCT TCTACAAATT CTGCCGCTCA AATTCCACTC  
XUE1\_promter AGAGCTTTAA ATAAGTTTCT TCTACAAATT CTGCCGCTCA AATTCCACTC  
Pepino\_promter AGAGCTTTAA ATAAGTTTCT TCTACAAATT CTGCCGCTCA AATTCCACTC

Jin5-508\_promter AGAGCTTTAA ATAAGTTTCT TCTACAAATT CTGCCGCTCA AATTCCACTC  
EP6392\_promter AGAGCTTTAA ATAAGTTTCT TCTACAAATT CTGCCGCTCA AATTCCACTC

D8\_promter TCTTCCTTAC TTCCTTCTTC AACTTCTTCT TTACATTTCT GCTGCGTTTC  
SPD010\_promter TCTTCCTTAC TTCCTTCTTC AACTTCTTCT TTACATTTCT GCTGCGTTTC  
DPD010\_promter TCTTCCTTAC TTCCTTCTTC AACTTCTTCT TTACATTTCT GCTGCGTTTC  
SPD110\_promter TCTTCCTTAC TTCCTTCTTC AACTTCTTCT TTACATTTCT GCTGCGTTTC  
XUE1\_promter TCTTCCTTAC TTCCTTCTTC AACTTCTTCT TTACATTTCT GCTGCGTTTC  
Pepino\_promter TCTTCCTTAC TTCCTTCTTC AACTTCTTCT TTACATTTCT GCTGCGTTTC  
Jin5-508\_promter TCTTCCTTAC TTCCTTCTTC AACTTCTTCT TTACATTTCT GCTGCGTTTC  
EP6392\_promter TCTTCCTTAC TTCCTTCTTC AACTTCTTCT TTACATTTCT GCTGCGTTTC

D8\_promter A  
SPD010\_promter A  
DPD010\_promter A  
SPD110\_promter A  
XUE1\_promter A  
Pepino\_promter A  
Jin5-508\_promter A  
EP6392\_promter A

Supplementary Figure 5 Phylogenetic relationships of *Csa2M058670.1* and *Arabidopsis* SET gene family. A Neighbor-joining tree was created by the MEGA6 program with 1,000 bootstrap sampling using the full protein sequences of *Csa2M058670.1* and 45 *Arabidopsis* SET proteins. *Arabidopsis* SET proteins were accessed from NCBI (<http://www.ncbi.nlm.nih.gov/>).

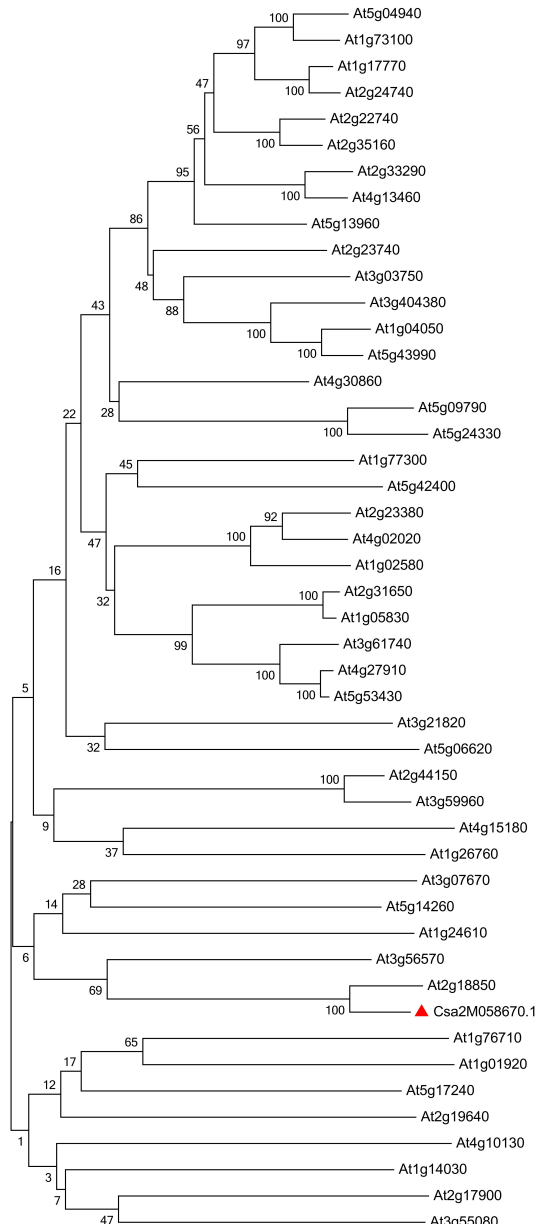



Supplementary Table 1 Detailed information of the filtered 2,259 SLAF makers.

| SLAF ID      | Chr  | Start   | End     | aa M | aa P | ab M | ab P | aa index M | aa index P | ab index M | ab index P | deta index M | ED     |
|--------------|------|---------|---------|------|------|------|------|------------|------------|------------|------------|--------------|--------|
| Marker119693 | Chr1 | 53877   | 54165   | 92   | 62   | 56   | 76   | 0.5974     | 0.4026     | 0.4242     | 0.5758     | -0.1732      | 0.2449 |
| Marker102935 | Chr1 | 1927504 | 1927748 | 17   | 6    | 9    | 18   | 0.7391     | 0.2609     | 0.3333     | 0.6667     | -0.4058      | 0.5739 |
| Marker111570 | Chr1 | 1994329 | 1994629 | 27   | 7    | 29   | 6    | 0.7941     | 0.2059     | 0.8286     | 0.1714     | 0.0345       | 0.0488 |
| Marker111661 | Chr1 | 2115435 | 2115777 | 19   | 22   | 16   | 26   | 0.4634     | 0.5366     | 0.381      | 0.619      | -0.0824      | 0.1165 |
| Marker106157 | Chr1 | 2120709 | 2120948 | 10   | 1    | 5    | 6    | 0.9091     | 0.0909     | 0.4545     | 0.5455     | -0.4546      | 0.6429 |
| Marker138798 | Chr1 | 2123149 | 2123405 | 13   | 11   | 6    | 14   | 0.5417     | 0.4583     | 0.3        | 0.7        | -0.2417      | 0.3418 |
| Marker125804 | Chr1 | 2125093 | 2125401 | 67   | 45   | 21   | 28   | 0.5982     | 0.4018     | 0.4286     | 0.5714     | -0.1696      | 0.2399 |
| Marker109354 | Chr1 | 2125404 | 2125725 | 41   | 51   | 25   | 39   | 0.4457     | 0.5543     | 0.3906     | 0.6094     | -0.0551      | 0.0779 |
| Marker135658 | Chr1 | 2125728 | 2126079 | 18   | 19   | 11   | 29   | 0.4865     | 0.5135     | 0.275      | 0.725      | -0.2115      | 0.2991 |
| Marker117020 | Chr1 | 2741665 | 2741910 | 15   | 7    | 11   | 12   | 0.6818     | 0.3182     | 0.4783     | 0.5217     | -0.2035      | 0.2878 |
| Marker120674 | Chr1 | 3623039 | 3623378 | 23   | 22   | 8    | 31   | 0.5111     | 0.4889     | 0.2051     | 0.7949     | -0.306       | 0.4327 |
| Marker121033 | Chr1 | 3623487 | 3623734 | 30   | 15   | 15   | 17   | 0.6667     | 0.3333     | 0.4688     | 0.5312     | -0.1979      | 0.2799 |
| Marker129161 | Chr1 | 3625060 | 3625318 | 11   | 6    | 4    | 5    | 0.6471     | 0.3529     | 0.4444     | 0.5556     | -0.2027      | 0.2867 |
| Marker139129 | Chr1 | 3638500 | 3638773 | 38   | 22   | 21   | 49   | 0.6333     | 0.3667     | 0.3        | 0.7        | -0.3333      | 0.4714 |
| Marker124989 | Chr1 | 3646642 | 3646901 | 19   | 8    | 6    | 14   | 0.7037     | 0.2963     | 0.3        | 0.7        | -0.4037      | 0.5709 |
| Marker116675 | Chr1 | 3646904 | 3647163 | 19   | 11   | 14   | 10   | 0.6333     | 0.3667     | 0.5833     | 0.4167     | -0.05        | 0.0707 |
| Marker119678 | Chr1 | 3647166 | 3647480 | 36   | 19   | 25   | 30   | 0.6545     | 0.3455     | 0.4545     | 0.5455     | -0.2         | 0.2828 |
| Marker124019 | Chr1 | 3656047 | 3656314 | 21   | 25   | 11   | 17   | 0.4565     | 0.5435     | 0.3929     | 0.6071     | -0.0636      | 0.0899 |
| Marker136006 | Chr1 | 3691127 | 3691435 | 41   | 20   | 12   | 24   | 0.6721     | 0.3279     | 0.3333     | 0.6667     | -0.3388      | 0.4791 |
| Marker120859 | Chr1 | 3808183 | 3808473 | 53   | 32   | 42   | 27   | 0.6235     | 0.3765     | 0.6087     | 0.3913     | -0.0148      | 0.0209 |
| Marker124648 | Chr1 | 3810699 | 3811040 | 9    | 21   | 13   | 24   | 0.3        | 0.7        | 0.3514     | 0.6486     | 0.0514       | 0.0727 |
| Marker147794 | Chr1 | 3826382 | 3826728 | 23   | 20   | 16   | 23   | 0.5349     | 0.4651     | 0.4103     | 0.5897     | -0.1246      | 0.1762 |
| Marker110774 | Chr1 | 3829083 | 3829353 | 39   | 29   | 20   | 24   | 0.5735     | 0.4265     | 0.4545     | 0.5455     | -0.119       | 0.1683 |
| Marker129763 | Chr1 | 3830095 | 3830454 | 17   | 5    | 5    | 10   | 0.7727     | 0.2273     | 0.3333     | 0.6667     | -0.4394      | 0.6214 |
| Marker107134 | Chr1 | 4192416 | 4192734 | 25   | 11   | 21   | 21   | 0.6944     | 0.3056     | 0.5        | 0.5        | -0.1944      | 0.2749 |
| Marker138072 | Chr1 | 4200061 | 4200350 | 64   | 26   | 27   | 45   | 0.7111     | 0.2889     | 0.375      | 0.625      | -0.3361      | 0.4753 |
| Marker136338 | Chr1 | 4268844 | 4269113 | 45   | 18   | 25   | 36   | 0.7143     | 0.2857     | 0.4098     | 0.5902     | -0.3045      | 0.4306 |
| Marker135556 | Chr1 | 4291092 | 4291341 | 6    | 4    | 6    | 10   | 0.6        | 0.4        | 0.375      | 0.625      | -0.225       | 0.3182 |
| Marker121758 | Chr1 | 4291353 | 4291652 | 104  | 34   | 40   | 42   | 0.7536     | 0.2464     | 0.4878     | 0.5122     | -0.2658      | 0.3759 |
| Marker140258 | Chr1 | 4300644 | 4300917 | 40   | 28   | 19   | 26   | 0.5882     | 0.4118     | 0.4222     | 0.5778     | -0.166       | 0.2348 |
| Marker143751 | Chr1 | 4385823 | 4386092 | 31   | 22   | 25   | 19   | 0.5849     | 0.4151     | 0.5682     | 0.4318     | -0.0167      | 0.0236 |
| Marker108689 | Chr1 | 4386803 | 4387113 | 94   | 68   | 56   | 72   | 0.5802     | 0.4198     | 0.4375     | 0.5625     | -0.1427      | 0.2018 |
| Marker138634 | Chr1 | 4387815 | 4388082 | 36   | 22   | 15   | 37   | 0.6207     | 0.3793     | 0.2885     | 0.7115     | -0.3322      | 0.4698 |
| Marker110106 | Chr1 | 4388085 | 4388395 | 136  | 50   | 55   | 88   | 0.7312     | 0.2688     | 0.3846     | 0.6154     | -0.3466      | 0.4902 |
| Marker141418 | Chr1 | 4404477 | 4404774 | 36   | 23   | 15   | 25   | 0.6102     | 0.3898     | 0.375      | 0.625      | -0.2352      | 0.3326 |
| Marker102884 | Chr1 | 4406302 | 4406610 | 35   | 24   | 20   | 22   | 0.5932     | 0.4068     | 0.4762     | 0.5238     | -0.117       | 0.1655 |
| Marker130778 | Chr1 | 4416645 | 4416876 | 8    | 10   | 6    | 6    | 0.4444     | 0.5556     | 0.5        | 0.5        | 0.0556       | 0.0786 |
| Marker136779 | Chr1 | 4513504 | 4513798 | 66   | 56   | 36   | 45   | 0.541      | 0.459      | 0.4444     | 0.5556     | -0.0966      | 0.1366 |
| Marker122746 | Chr1 | 4515269 | 4515566 | 39   | 26   | 20   | 30   | 0.6        | 0.4        | 0.4        | 0.6        | -0.2         | 0.2828 |
| Marker115818 | Chr1 | 4532736 | 4533050 | 110  | 69   | 56   | 135  | 0.6145     | 0.3855     | 0.2932     | 0.7068     | -0.3213      | 0.4544 |
| Marker135905 | Chr1 | 4539781 | 4540032 | 19   | 14   | 9    | 8    | 0.5758     | 0.4242     | 0.5294     | 0.4706     | -0.0464      | 0.0656 |
| Marker110949 | Chr1 | 4542830 | 4543118 | 39   | 28   | 26   | 35   | 0.5821     | 0.4179     | 0.4262     | 0.5738     | -0.1559      | 0.2205 |
| Marker130179 | Chr1 | 4546101 | 4546409 | 66   | 48   | 29   | 38   | 0.5789     | 0.4211     | 0.4328     | 0.5672     | -0.1461      | 0.2066 |
| Marker116365 | Chr1 | 4546412 | 4546751 | 24   | 26   | 11   | 41   | 0.48       | 0.52       | 0.2115     | 0.7885     | -0.2685      | 0.3797 |
| Marker109246 | Chr1 | 4546981 | 4547328 | 27   | 12   | 11   | 18   | 0.6923     | 0.3077     | 0.3793     | 0.6207     | -0.313       | 0.4426 |
| Marker107804 | Chr1 | 4547720 | 4547955 | 8    | 4    | 6    | 12   | 0.6667     | 0.3333     | 0.3333     | 0.6667     | -0.3334      | 0.4715 |
| Marker147102 | Chr1 | 4553596 | 4553941 | 38   | 29   | 18   | 24   | 0.5672     | 0.4328     | 0.4286     | 0.5714     | -0.1386      | 0.196  |
| Marker137641 | Chr1 | 4691151 | 4691453 | 59   | 29   | 19   | 30   | 0.6705     | 0.3295     | 0.3878     | 0.6122     | -0.2827      | 0.3998 |
| Marker107866 | Chr1 | 4882811 | 4883152 | 22   | 4    | 8    | 11   | 0.8462     | 0.1538     | 0.4211     | 0.5789     | -0.4251      | 0.6012 |
| Marker115595 | Chr1 | 6032399 | 6032722 | 31   | 7    | 20   | 5    | 0.8158     | 0.1842     | 0.8        | 0.2        | -0.0158      | 0.0223 |
| Marker105945 | Chr1 | 6049940 | 6050228 | 56   | 36   | 28   | 26   | 0.6087     | 0.3913     | 0.5185     | 0.4815     | -0.0902      | 0.1276 |
| Marker110146 | Chr1 | 6145200 | 6145453 | 21   | 2    | 13   | 4    | 0.913      | 0.087      | 0.7647     | 0.2353     | -0.1483      | 0.2097 |
| Marker130586 | Chr1 | 6176522 | 6176814 | 36   | 14   | 22   | 19   | 0.72       | 0.28       | 0.5366     | 0.4634     | -0.1834      | 0.2594 |
| Marker142705 | Chr1 | 6179040 | 6179333 | 12   | 6    | 6    | 18   | 0.6667     | 0.3333     | 0.25       | 0.75       | -0.4167      | 0.5893 |
| Marker103834 | Chr1 | 6179817 | 6180137 | 49   | 32   | 16   | 25   | 0.6049     | 0.3951     | 0.3902     | 0.6098     | -0.2147      | 0.3036 |
| Marker138343 | Chr1 | 6188591 | 6188876 | 210  | 86   | 144  | 195  | 0.7095     | 0.2905     | 0.4248     | 0.5752     | -0.2847      | 0.4026 |
| Marker115906 | Chr1 | 6201486 | 6201788 | 75   | 41   | 38   | 74   | 0.6466     | 0.3534     | 0.3393     | 0.6607     | -0.3073      | 0.4346 |
| Marker143999 | Chr1 | 6207268 | 6207624 | 26   | 13   | 8    | 22   | 0.6667     | 0.3333     | 0.2667     | 0.7333     | -0.4         | 0.5657 |
| Marker137635 | Chr1 | 6213663 | 6213965 | 27   | 20   | 24   | 27   | 0.5745     | 0.4255     | 0.4706     | 0.5294     | -0.1039      | 0.1469 |
| Marker109917 | Chr1 | 6216773 | 6217075 | 52   | 23   | 37   | 58   | 0.6933     | 0.3067     | 0.3895     | 0.6105     | -0.3038      | 0.4296 |
| Marker106556 | Chr1 | 6217508 | 6217756 | 9    | 6    | 5    | 3    | 0.6        | 0.4        | 0.625      | 0.375      | 0.025        | 0.0354 |
| Marker130987 | Chr1 | 6228587 | 6228895 | 36   | 16   | 14   | 14   | 0.6923     | 0.3077     | 0.5        | 0.5        | -0.1923      | 0.272  |
| Marker139409 | Chr1 | 6231902 | 6232177 | 13   | 7    | 7    | 15   | 0.65       | 0.35       | 0.3182     | 0.6818     | -0.3318      | 0.4692 |
| Marker124201 | Chr1 | 7406406 | 7406688 | 29   | 0    | 3    | 3    | 1          | 0          | 0.5        | 0.5        | -0.5         | 0.7071 |
| Marker120352 | Chr1 | 7671930 | 7672249 | 21   | 7    | 24   | 5    | 0.75       | 0.25       | 0.8276     | 0.1724     | 0.0776       | 0.1097 |
| Marker108342 | Chr1 | 7741654 | 7741980 | 25   | 1    | 21   | 1    | 0.9615     | 0.0385     | 0.9545     | 0.0455     | -0.007       | 0.0099 |
| Marker104993 | Chr1 | 8314742 | 8315011 | 18   | 19   | 18   | 21   | 0.4865     | 0.5135     | 0.4615     | 0.5385     | -0.025       | 0.0354 |
| Marker134059 | Chr1 | 8473902 | 8474262 | 11   | 12   | 7    | 16   | 0.4783     | 0.5217     | 0.3043     | 0.6957     | -0.174       | 0.2461 |
| Marker107150 | Chr1 | 8500727 | 8500820 | 8    | 12   | 8    | 5    | 0.4        | 0.6        | 0.6154     | 0.3846     | 0.2154       | 0.3046 |
| Marker136982 | Chr1 | 8880802 | 8881156 | 12   | 10   | 10   | 4    | 0.5455     | 0.4545     | 0.7143     | 0.2857     | 0.1688       | 0.2387 |
| Marker146482 | Chr1 | 9057340 | 9057594 | 40   | 11   | 35   | 12   | 0.7843     | 0.2157     | 0.7447     | 0.2553     | -0.0396      | 0.056  |
| Marker137824 | Chr1 | 9090806 | 9091058 | 9    | 3    | 7    | 2    | 0.75       | 0.25       | 0.7778     | 0.2222     | 0.0278       | 0.0393 |
| Marker102527 | Chr1 | 9107781 | 9108114 | 9    | 26   | 7    | 7    | 0.2571     | 0.7429     | 0.5        | 0.5        | 0.2429       | 0.3435 |
| Marker133186 | Chr1 | 9167694 | 9168011 | 22   | 11   | 11   | 4    | 0.6667     | 0.3333     | 0.7333     | 0.2667     | 0.0666       | 0.0942 |
| Marker108652 | Chr1 | 9203115 | 9203438 | 38   | 21   | 26   | 23   | 0.6441     | 0.3559     | 0.5306     | 0.4694     | -0.1135      | 0.1605 |
| Marker106137 | Chr1 | 9266967 | 9267302 | 65   | 61   | 30   | 53   | 0.5159     | 0.4841     | 0.3614     | 0.6386     | -0.1545      | 0.2185 |
| Marker107767 | Chr1 | 9290456 | 9290719 | 34   | 7    | 31   | 11   | 0.8293     | 0.1707     | 0.7381     | 0.2619     | -0.0912      | 0.129  |
| Marker115850 | Chr1 | 9296566 | 9296839 | 76   | 45   | 20   | 63   | 0.6281     | 0.3719     | 0.241      | 0.759      | -0.3871      | 0.5474 |
| Marker141164 | Chr1 | 9299174 | 9299472 | 21   | 5    | 29   | 7    | 0.8077     | 0.1923     | 0.8056     | 0.1944     | -0.0021      | 0.003  |

|              |      |          |          |     |    |    |     |        |        |        |        |         |        |
|--------------|------|----------|----------|-----|----|----|-----|--------|--------|--------|--------|---------|--------|
| Marker134656 | Chr1 | 9305601  | 9305883  | 50  | 42 | 38 | 57  | 0.5435 | 0.4565 | 0.4    | 0.6    | -0.1435 | 0.2029 |
| Marker121174 | Chr1 | 9307718  | 9307986  | 18  | 18 | 14 | 21  | 0.5    | 0.5    | 0.4    | 0.6    | -0.1    | 0.1414 |
| Marker128208 | Chr1 | 9316978  | 9317267  | 49  | 42 | 24 | 43  | 0.5385 | 0.4615 | 0.3582 | 0.6418 | -0.1803 | 0.255  |
| Marker138586 | Chr1 | 9330541  | 9330762  | 16  | 11 | 18 | 19  | 0.5926 | 0.4074 | 0.4865 | 0.5135 | -0.1061 | 0.15   |
| Marker132955 | Chr1 | 9334557  | 9334888  | 15  | 19 | 5  | 37  | 0.4412 | 0.5588 | 0.119  | 0.881  | -0.3222 | 0.4557 |
| Marker139853 | Chr1 | 9334972  | 9335274  | 31  | 24 | 17 | 30  | 0.5636 | 0.4364 | 0.3617 | 0.6383 | -0.2019 | 0.2855 |
| Marker117210 | Chr1 | 9374293  | 9374550  | 15  | 8  | 5  | 10  | 0.6522 | 0.3478 | 0.3333 | 0.6667 | -0.3189 | 0.451  |
| Marker138254 | Chr1 | 9375042  | 9375236  | 11  | 9  | 9  | 20  | 0.55   | 0.45   | 0.3103 | 0.6897 | -0.2397 | 0.339  |
| Marker139292 | Chr1 | 9386647  | 9386883  | 10  | 7  | 3  | 0   | 0.5882 | 0.4118 | 1      | 0      | 0.4118  | 0.5824 |
| Marker111405 | Chr1 | 9387586  | 9387902  | 57  | 33 | 32 | 25  | 0.6333 | 0.3667 | 0.5614 | 0.4386 | -0.0719 | 0.1017 |
| Marker117701 | Chr1 | 9406655  | 9406927  | 24  | 9  | 12 | 21  | 0.7273 | 0.2727 | 0.3636 | 0.6364 | -0.3637 | 0.5143 |
| Marker141296 | Chr1 | 9427406  | 9427722  | 41  | 27 | 20 | 26  | 0.6029 | 0.3971 | 0.4348 | 0.5652 | -0.1681 | 0.2377 |
| Marker112003 | Chr1 | 9432461  | 9432820  | 7   | 13 | 9  | 12  | 0.35   | 0.65   | 0.4286 | 0.5714 | 0.0786  | 0.1112 |
| Marker131252 | Chr1 | 9433118  | 9433400  | 137 | 69 | 48 | 113 | 0.665  | 0.335  | 0.2981 | 0.7019 | -0.3669 | 0.5189 |
| Marker148229 | Chr1 | 9433576  | 9433852  | 32  | 28 | 26 | 41  | 0.5333 | 0.4667 | 0.3881 | 0.6119 | -0.1452 | 0.2053 |
| Marker117148 | Chr1 | 9483082  | 9483442  | 17  | 8  | 14 | 2   | 0.68   | 0.32   | 0.875  | 0.125  | 0.195   | 0.2758 |
| Marker104399 | Chr1 | 9493912  | 9494232  | 41  | 58 | 46 | 47  | 0.4141 | 0.5859 | 0.4946 | 0.5054 | 0.0805  | 0.1138 |
| Marker123482 | Chr1 | 9513549  | 9513851  | 32  | 5  | 26 | 6   | 0.8649 | 0.1351 | 0.8125 | 0.1875 | -0.0524 | 0.0741 |
| Marker133477 | Chr1 | 9867999  | 9868353  | 39  | 13 | 21 | 18  | 0.75   | 0.25   | 0.5385 | 0.4615 | -0.2115 | 0.2991 |
| Marker148907 | Chr1 | 9949398  | 9949656  | 14  | 12 | 12 | 4   | 0.5385 | 0.4615 | 0.75   | 0.25   | 0.2115  | 0.2991 |
| Marker123662 | Chr1 | 9971690  | 9971981  | 54  | 20 | 32 | 26  | 0.7297 | 0.2703 | 0.5517 | 0.4483 | -0.178  | 0.2517 |
| Marker122468 | Chr1 | 10521413 | 10521634 | 16  | 2  | 10 | 5   | 0.8889 | 0.1111 | 0.6667 | 0.3333 | -0.2222 | 0.3142 |
| Marker103204 | Chr1 | 10539950 | 10540250 | 54  | 10 | 24 | 20  | 0.8438 | 0.1562 | 0.5455 | 0.4545 | -0.2983 | 0.4219 |
| Marker109809 | Chr1 | 10545910 | 10546182 | 42  | 18 | 48 | 14  | 0.7    | 0.3    | 0.7742 | 0.2258 | 0.0742  | 0.1049 |
| Marker134487 | Chr1 | 10547160 | 10547340 | 6   | 11 | 4  | 13  | 0.3529 | 0.6471 | 0.2353 | 0.7647 | -0.1176 | 0.1663 |
| Marker130320 | Chr1 | 10569834 | 10570162 | 24  | 8  | 23 | 14  | 0.75   | 0.25   | 0.6216 | 0.3784 | -0.1284 | 0.1816 |
| Marker137552 | Chr1 | 10653903 | 10654227 | 51  | 14 | 28 | 7   | 0.7846 | 0.2154 | 0.8    | 0.2    | 0.0154  | 0.0218 |
| Marker119631 | Chr1 | 10703224 | 10703517 | 48  | 50 | 28 | 33  | 0.4898 | 0.5102 | 0.459  | 0.541  | -0.0308 | 0.0436 |
| Marker142371 | Chr1 | 10842524 | 10842860 | 13  | 10 | 15 | 10  | 0.5652 | 0.4348 | 0.6    | 0.4    | 0.0348  | 0.0492 |
| Marker117247 | Chr1 | 10878854 | 10879186 | 50  | 65 | 40 | 74  | 0.4348 | 0.5652 | 0.3509 | 0.6491 | -0.0839 | 0.1187 |
| Marker127710 | Chr1 | 10891415 | 10891692 | 38  | 26 | 16 | 53  | 0.5938 | 0.4062 | 0.2319 | 0.7681 | -0.3619 | 0.5118 |
| Marker113442 | Chr1 | 10901705 | 10902040 | 71  | 19 | 37 | 21  | 0.7889 | 0.2111 | 0.6379 | 0.3621 | -0.151  | 0.2135 |
| Marker111470 | Chr1 | 11143082 | 11143356 | 15  | 10 | 15 | 8   | 0.6    | 0.4    | 0.6522 | 0.3478 | 0.0522  | 0.0738 |
| Marker148195 | Chr1 | 11167753 | 11168106 | 30  | 24 | 25 | 32  | 0.5556 | 0.4444 | 0.4386 | 0.5614 | -0.117  | 0.1655 |
| Marker126766 | Chr1 | 11193423 | 11193724 | 57  | 50 | 29 | 37  | 0.5327 | 0.4673 | 0.4394 | 0.5606 | -0.0933 | 0.1319 |
| Marker112228 | Chr1 | 11209281 | 11209606 | 23  | 20 | 23 | 19  | 0.5349 | 0.4651 | 0.5476 | 0.4524 | 0.0127  | 0.018  |
| Marker116015 | Chr1 | 11706942 | 11707297 | 13  | 12 | 7  | 14  | 0.52   | 0.48   | 0.3333 | 0.6667 | -0.1867 | 0.264  |
| Marker131859 | Chr1 | 11799713 | 11800033 | 58  | 26 | 18 | 33  | 0.6905 | 0.3095 | 0.3529 | 0.6471 | -0.3376 | 0.4774 |
| Marker141488 | Chr1 | 11816600 | 11816845 | 13  | 11 | 7  | 7   | 0.5417 | 0.4583 | 0.5    | 0.5    | -0.0417 | 0.059  |
| Marker110459 | Chr1 | 11851882 | 11852240 | 47  | 26 | 28 | 31  | 0.6438 | 0.3562 | 0.4746 | 0.5254 | -0.1692 | 0.2393 |
| Marker117323 | Chr1 | 11910468 | 11910777 | 61  | 11 | 41 | 3   | 0.8472 | 0.1528 | 0.9318 | 0.0682 | 0.0846  | 0.1196 |
| Marker143377 | Chr1 | 12341157 | 12341428 | 81  | 62 | 69 | 65  | 0.5664 | 0.4336 | 0.5149 | 0.4851 | -0.0515 | 0.0728 |
| Marker111844 | Chr1 | 13511853 | 13512198 | 32  | 8  | 27 | 2   | 0.8    | 0.2    | 0.931  | 0.069  | 0.131   | 0.1853 |
| Marker102841 | Chr1 | 13801458 | 13801761 | 42  | 19 | 32 | 12  | 0.6885 | 0.3115 | 0.7273 | 0.2727 | 0.0388  | 0.0549 |
| Marker128402 | Chr1 | 14014450 | 14014748 | 29  | 10 | 15 | 10  | 0.7436 | 0.2564 | 0.6    | 0.4    | -0.1436 | 0.2031 |
| Marker120004 | Chr1 | 14037836 | 14038196 | 17  | 22 | 4  | 10  | 0.4359 | 0.5641 | 0.2857 | 0.7143 | -0.1502 | 0.2124 |
| Marker113908 | Chr1 | 14305377 | 14305716 | 40  | 5  | 34 | 0   | 0.8889 | 0.1111 | 1      | 0      | 0.1111  | 0.1571 |
| Marker148700 | Chr1 | 14406877 | 14407134 | 40  | 9  | 30 | 10  | 0.8163 | 0.1837 | 0.75   | 0.25   | -0.0663 | 0.0938 |
| Marker128633 | Chr1 | 14544037 | 14544321 | 26  | 22 | 13 | 32  | 0.5417 | 0.4583 | 0.2889 | 0.7111 | -0.2528 | 0.3575 |
| Marker132242 | Chr1 | 14581018 | 14581282 | 34  | 9  | 23 | 11  | 0.7907 | 0.2093 | 0.6765 | 0.3235 | -0.1142 | 0.1615 |
| Marker123881 | Chr1 | 14606933 | 14607212 | 48  | 17 | 46 | 29  | 0.7385 | 0.2615 | 0.6133 | 0.3867 | -0.1252 | 0.1771 |
| Marker120322 | Chr1 | 14616197 | 14616468 | 42  | 7  | 35 | 23  | 0.8571 | 0.1429 | 0.6034 | 0.3966 | -0.2537 | 0.3588 |
| Marker122040 | Chr1 | 14617115 | 14617395 | 86  | 16 | 44 | 16  | 0.8431 | 0.1569 | 0.7333 | 0.2667 | -0.1098 | 0.1553 |
| Marker111871 | Chr1 | 14618114 | 14618411 | 22  | 20 | 13 | 17  | 0.5238 | 0.4762 | 0.4333 | 0.5667 | -0.0905 | 0.128  |
| Marker135930 | Chr1 | 14719082 | 14719439 | 35  | 19 | 7  | 12  | 0.6481 | 0.3519 | 0.3684 | 0.6316 | -0.2797 | 0.3956 |
| Marker121138 | Chr1 | 15003248 | 15003612 | 15  | 5  | 15 | 13  | 0.75   | 0.25   | 0.5037 | 0.4643 | -0.2143 | 0.3031 |
| Marker131007 | Chr1 | 15037028 | 15037292 | 42  | 13 | 30 | 29  | 0.7636 | 0.2364 | 0.5085 | 0.4915 | -0.2551 | 0.3608 |
| Marker102036 | Chr1 | 15064160 | 15064389 | 20  | 7  | 10 | 9   | 0.7407 | 0.2593 | 0.5263 | 0.4737 | -0.2144 | 0.3032 |
| Marker141409 | Chr1 | 15081417 | 15081724 | 6   | 5  | 4  | 6   | 0.5455 | 0.4545 | 0.4    | 0.6    | -0.1455 | 0.2058 |
| Marker126942 | Chr1 | 15082396 | 15082660 | 21  | 6  | 12 | 9   | 0.7778 | 0.2222 | 0.5714 | 0.4286 | -0.2064 | 0.2919 |
| Marker128869 | Chr1 | 15123787 | 15124080 | 69  | 20 | 42 | 27  | 0.7753 | 0.2247 | 0.6087 | 0.3913 | -0.1666 | 0.2356 |
| Marker107443 | Chr1 | 15151261 | 15151570 | 21  | 4  | 7  | 4   | 0.84   | 0.16   | 0.6364 | 0.3636 | -0.2036 | 0.2879 |
| Marker133925 | Chr1 | 15153942 | 15154219 | 48  | 11 | 44 | 28  | 0.8136 | 0.1864 | 0.6111 | 0.3889 | -0.2025 | 0.2864 |
| Marker141260 | Chr1 | 15162631 | 15162939 | 30  | 8  | 30 | 20  | 0.7895 | 0.2105 | 0.6    | 0.4    | -0.1895 | 0.268  |
| Marker142212 | Chr1 | 15187778 | 15188131 | 40  | 5  | 16 | 6   | 0.8889 | 0.1111 | 0.7273 | 0.2727 | -0.1616 | 0.2285 |
| Marker112018 | Chr1 | 15207150 | 15207460 | 47  | 13 | 19 | 15  | 0.7833 | 0.2167 | 0.5588 | 0.4412 | -0.2245 | 0.3175 |
| Marker143660 | Chr1 | 15228344 | 15228566 | 16  | 4  | 6  | 4   | 0.8    | 0.2    | 0.6    | 0.4    | -0.2    | 0.2828 |
| Marker138207 | Chr1 | 15242734 | 15243063 | 75  | 13 | 56 | 34  | 0.8523 | 0.1477 | 0.6222 | 0.3778 | -0.2301 | 0.3254 |
| Marker114721 | Chr1 | 15248938 | 15249191 | 14  | 6  | 8  | 6   | 0.7    | 0.3    | 0.5714 | 0.4286 | -0.1286 | 0.1819 |
| Marker147957 | Chr1 | 15280520 | 15280806 | 29  | 11 | 27 | 9   | 0.725  | 0.275  | 0.75   | 0.25   | 0.025   | 0.0354 |
| Marker126377 | Chr1 | 15286263 | 15286522 | 12  | 6  | 6  | 2   | 0.6667 | 0.3333 | 0.75   | 0.25   | 0.0833  | 0.1178 |
| Marker121760 | Chr1 | 15286790 | 15287043 | 37  | 6  | 22 | 12  | 0.8605 | 0.1395 | 0.6471 | 0.3529 | -0.2134 | 0.3018 |
| Marker136185 | Chr1 | 15295194 | 15295444 | 8   | 4  | 15 | 8   | 0.6667 | 0.3333 | 0.6522 | 0.3478 | -0.0145 | 0.0205 |
| Marker115442 | Chr1 | 15302474 | 15302743 | 52  | 30 | 36 | 50  | 0.6341 | 0.3659 | 0.4186 | 0.5814 | -0.2155 | 0.3048 |
| Marker130825 | Chr1 | 15320162 | 15320526 | 25  | 7  | 5  | 7   | 0.7812 | 0.2188 | 0.4167 | 0.5833 | -0.3645 | 0.5155 |
| Marker147112 | Chr1 | 15476096 | 15476391 | 28  | 10 | 13 | 20  | 0.7368 | 0.2632 | 0.3939 | 0.6061 | -0.3429 | 0.4849 |
| Marker129635 | Chr1 | 15832409 | 15832703 | 44  | 2  | 33 | 18  | 0.9565 | 0.0435 | 0.6471 | 0.3529 | -0.3094 | 0.4376 |
| Marker147681 | Chr1 | 15975810 | 15976104 | 31  | 9  | 22 | 17  | 0.775  | 0.225  | 0.5641 | 0.4359 | -0.2109 | 0.2983 |
| Marker146137 | Chr1 | 15993401 | 15993759 | 18  | 10 | 17 | 2   | 0.6429 | 0.3571 | 0.5947 | 0.1053 | 0.2518  | 0.3561 |
| Marker137829 | Chr1 | 15996671 | 15996871 | 18  | 7  | 17 | 6   | 0.72   | 0.28   | 0.7391 | 0.2609 | 0.0191  | 0.027  |
| Marker143901 | Chr1 | 16010495 | 16010727 | 26  | 4  | 12 | 7   | 0.8667 | 0.1333 | 0.6316 | 0.3684 | -0.2351 | 0.3325 |
| Marker135404 | Chr1 | 16012010 | 16012298 | 60  | 13 | 60 | 30  | 0.8219 | 0.1781 | 0.6667 | 0.3333 | -0.1552 | 0.2195 |

|              |      |          |          |     |    |     |     |        |        |        |        |         |        |
|--------------|------|----------|----------|-----|----|-----|-----|--------|--------|--------|--------|---------|--------|
| Marker148679 | Chr1 | 16012301 | 16012573 | 56  | 33 | 44  | 51  | 0.6292 | 0.3708 | 0.4632 | 0.5368 | -0.166  | 0.2348 |
| Marker138877 | Chr1 | 16019264 | 16019603 | 55  | 13 | 26  | 17  | 0.8088 | 0.1912 | 0.6047 | 0.3953 | -0.2041 | 0.2886 |
| Marker135593 | Chr1 | 16019606 | 16019872 | 73  | 22 | 47  | 29  | 0.7684 | 0.2316 | 0.6184 | 0.3816 | -0.15   | 0.2121 |
| Marker145842 | Chr1 | 16053524 | 16053849 | 22  | 1  | 14  | 1   | 0.9565 | 0.0435 | 0.9333 | 0.0667 | -0.0232 | 0.0328 |
| Marker12911  | Chr1 | 16081087 | 16081380 | 41  | 16 | 37  | 26  | 0.7193 | 0.2807 | 0.5873 | 0.4127 | -0.132  | 0.1867 |
| Marker131152 | Chr1 | 16398977 | 16399302 | 22  | 15 | 5   | 17  | 0.5946 | 0.4054 | 0.2273 | 0.7727 | -0.3673 | 0.5194 |
| Marker140885 | Chr1 | 16437738 | 16438006 | 32  | 20 | 12  | 32  | 0.6154 | 0.3846 | 0.2727 | 0.7273 | -0.3427 | 0.4847 |
| Marker110354 | Chr1 | 16495929 | 16496156 | 22  | 15 | 22  | 19  | 0.5946 | 0.4054 | 0.5366 | 0.4634 | -0.058  | 0.082  |
| Marker129777 | Chr1 | 16528629 | 16528977 | 35  | 35 | 27  | 26  | 0.5    | 0.5    | 0.5094 | 0.4906 | 0.0094  | 0.0133 |
| Marker137520 | Chr1 | 16548326 | 16548665 | 10  | 19 | 9   | 18  | 0.3448 | 0.6552 | 0.3333 | 0.6667 | -0.0115 | 0.0163 |
| Marker145774 | Chr1 | 16583818 | 16584095 | 32  | 30 | 16  | 24  | 0.5161 | 0.4839 | 0.4    | 0.6    | -0.1161 | 0.1642 |
| Marker146424 | Chr1 | 17376504 | 17376756 | 14  | 7  | 8   | 6   | 0.6667 | 0.3333 | 0.5714 | 0.4286 | -0.0953 | 0.1348 |
| Marker136564 | Chr1 | 17406328 | 17406688 | 10  | 2  | 10  | 3   | 0.8333 | 0.1667 | 0.7692 | 0.2308 | -0.0641 | 0.0907 |
| Marker146452 | Chr1 | 18789862 | 18790115 | 16  | 14 | 6   | 14  | 0.5333 | 0.4667 | 0.3    | 0.7    | -0.2333 | 0.3299 |
| Marker113526 | Chr1 | 18805127 | 18805444 | 12  | 5  | 9   | 9   | 0.7059 | 0.2941 | 0.5    | 0.5    | -0.2059 | 0.2912 |
| Marker143320 | Chr1 | 18818908 | 18819161 | 7   | 9  | 2   | 9   | 0.4375 | 0.5625 | 0.1818 | 0.8182 | -0.2557 | 0.3616 |
| Marker143084 | Chr1 | 18909909 | 18910197 | 22  | 29 | 16  | 32  | 0.4314 | 0.5686 | 0.3333 | 0.6667 | -0.0981 | 0.1387 |
| Marker136390 | Chr1 | 18936823 | 18937121 | 17  | 26 | 17  | 38  | 0.3953 | 0.6047 | 0.3091 | 0.6909 | -0.0862 | 0.1219 |
| Marker113524 | Chr1 | 18938631 | 18938941 | 50  | 35 | 37  | 24  | 0.5882 | 0.4118 | 0.6066 | 0.3934 | 0.0184  | 0.026  |
| Marker128410 | Chr1 | 19129447 | 19129799 | 25  | 22 | 15  | 27  | 0.5319 | 0.4681 | 0.3571 | 0.6429 | -0.1748 | 0.2472 |
| Marker128825 | Chr1 | 19433160 | 19433493 | 27  | 10 | 32  | 7   | 0.7297 | 0.2703 | 0.8205 | 0.1795 | 0.0908  | 0.1284 |
| Marker144080 | Chr1 | 19452090 | 19452387 | 230 | 79 | 183 | 102 | 0.7443 | 0.2557 | 0.6421 | 0.3579 | -0.1022 | 0.1445 |
| Marker116214 | Chr1 | 19454442 | 19454709 | 43  | 11 | 19  | 20  | 0.7963 | 0.2037 | 0.4872 | 0.5128 | -0.3091 | 0.4371 |
| Marker115573 | Chr1 | 19511400 | 19511668 | 36  | 8  | 10  | 17  | 0.8182 | 0.1818 | 0.3704 | 0.6296 | -0.4478 | 0.6333 |
| Marker121537 | Chr1 | 19513012 | 19513308 | 29  | 23 | 24  | 26  | 0.5577 | 0.4423 | 0.48   | 0.52   | -0.0777 | 0.1099 |
| Marker117932 | Chr1 | 19514806 | 19515126 | 6   | 1  | 0   | 1   | 0.8571 | 0.1429 | 0      | 1      | -0.8571 | 1.2121 |
| Marker116279 | Chr1 | 19532775 | 19533086 | 27  | 18 | 13  | 20  | 0.6    | 0.4    | 0.3939 | 0.6061 | -0.2061 | 0.2915 |
| Marker131548 | Chr1 | 19723398 | 19723648 | 15  | 7  | 6   | 8   | 0.6818 | 0.3182 | 0.4286 | 0.5714 | -0.2532 | 0.3581 |
| Marker111692 | Chr1 | 19724111 | 19724395 | 60  | 58 | 36  | 52  | 0.5085 | 0.4915 | 0.4091 | 0.5909 | -0.0994 | 0.1406 |
| Marker110956 | Chr1 | 19724398 | 19724759 | 15  | 9  | 14  | 10  | 0.625  | 0.375  | 0.5833 | 0.4167 | -0.0417 | 0.059  |
| Marker124329 | Chr1 | 19733287 | 19733573 | 55  | 40 | 18  | 36  | 0.5789 | 0.4211 | 0.3333 | 0.6667 | -0.2456 | 0.3473 |
| Marker136350 | Chr1 | 19734561 | 19734897 | 47  | 29 | 31  | 30  | 0.6184 | 0.3816 | 0.5082 | 0.4918 | -0.1102 | 0.1558 |
| Marker106024 | Chr1 | 19737636 | 19737846 | 12  | 4  | 4   | 7   | 0.75   | 0.25   | 0.3636 | 0.6364 | -0.3864 | 0.5465 |
| Marker121260 | Chr1 | 19756425 | 19756696 | 28  | 9  | 9   | 8   | 0.7568 | 0.2432 | 0.5294 | 0.4706 | -0.2274 | 0.3216 |
| Marker106792 | Chr1 | 19816847 | 19817113 | 48  | 21 | 33  | 16  | 0.6957 | 0.3043 | 0.6735 | 0.3265 | -0.0222 | 0.0314 |
| Marker129120 | Chr1 | 19864395 | 19864644 | 12  | 3  | 9   | 4   | 0.8    | 0.2    | 0.6923 | 0.3077 | -0.1077 | 0.1523 |
| Marker142447 | Chr1 | 20065970 | 20066270 | 35  | 17 | 16  | 18  | 0.6731 | 0.3269 | 0.4706 | 0.5294 | -0.2025 | 0.2864 |
| Marker135474 | Chr1 | 20091173 | 20091425 | 27  | 14 | 30  | 12  | 0.6585 | 0.3415 | 0.7143 | 0.2857 | 0.0558  | 0.0789 |
| Marker112136 | Chr1 | 20122551 | 20122890 | 81  | 64 | 38  | 38  | 0.5586 | 0.4414 | 0.5    | 0.5    | -0.0586 | 0.0829 |
| Marker144094 | Chr1 | 20480332 | 20480577 | 18  | 5  | 13  | 7   | 0.7826 | 0.2174 | 0.65   | 0.35   | -0.1326 | 0.1875 |
| Marker138069 | Chr1 | 20524142 | 20524427 | 18  | 10 | 28  | 13  | 0.6429 | 0.3571 | 0.6829 | 0.3171 | 0.04    | 0.0566 |
| Marker129539 | Chr1 | 20547915 | 20548280 | 23  | 16 | 29  | 14  | 0.5897 | 0.4103 | 0.6744 | 0.3256 | 0.0847  | 0.1198 |
| Marker145507 | Chr1 | 20585070 | 20585380 | 26  | 15 | 30  | 27  | 0.6341 | 0.3659 | 0.5263 | 0.4737 | -0.1078 | 0.1525 |
| Marker117282 | Chr1 | 20633694 | 20633961 | 19  | 20 | 25  | 5   | 0.4872 | 0.5128 | 0.8333 | 0.1667 | 0.3461  | 0.4895 |
| Marker114467 | Chr1 | 20658193 | 20658447 | 11  | 6  | 5   | 2   | 0.6471 | 0.3529 | 0.7143 | 0.2857 | 0.0672  | 0.095  |
| Marker107360 | Chr1 | 20786495 | 20786815 | 28  | 31 | 21  | 33  | 0.4746 | 0.5254 | 0.3889 | 0.6111 | -0.0857 | 0.1212 |
| Marker130610 | Chr1 | 20792512 | 20792792 | 18  | 14 | 10  | 25  | 0.5625 | 0.4375 | 0.2857 | 0.7143 | -0.2768 | 0.3915 |
| Marker141473 | Chr1 | 20793805 | 20794046 | 13  | 6  | 7   | 9   | 0.6842 | 0.3158 | 0.4375 | 0.5625 | -0.2467 | 0.3489 |
| Marker120983 | Chr1 | 20794049 | 20794339 | 38  | 33 | 24  | 47  | 0.5352 | 0.4648 | 0.338  | 0.662  | -0.1972 | 0.2789 |
| Marker133470 | Chr1 | 20823712 | 20823993 | 49  | 53 | 17  | 37  | 0.4804 | 0.5196 | 0.3148 | 0.6852 | -0.1656 | 0.2342 |
| Marker145831 | Chr1 | 20837912 | 20838173 | 15  | 14 | 6   | 6   | 0.5172 | 0.4828 | 0.5    | 0.5    | -0.0172 | 0.0243 |
| Marker115864 | Chr1 | 20911033 | 20911297 | 24  | 29 | 15  | 20  | 0.4528 | 0.5472 | 0.4286 | 0.5714 | -0.0242 | 0.0342 |
| Marker146056 | Chr1 | 20948047 | 20948350 | 45  | 26 | 23  | 38  | 0.6338 | 0.3662 | 0.377  | 0.623  | -0.2568 | 0.3632 |
| Marker132724 | Chr1 | 20981932 | 20982224 | 55  | 59 | 23  | 62  | 0.4825 | 0.5175 | 0.2706 | 0.7294 | -0.2119 | 0.2997 |
| Marker121602 | Chr1 | 21024823 | 21025089 | 14  | 19 | 6   | 20  | 0.4242 | 0.5758 | 0.2308 | 0.7692 | -0.1934 | 0.2735 |
| Marker148837 | Chr1 | 21028883 | 21029171 | 32  | 26 | 13  | 22  | 0.5517 | 0.4483 | 0.3714 | 0.6286 | -0.1803 | 0.255  |
| Marker141690 | Chr1 | 21062282 | 21062639 | 74  | 29 | 37  | 35  | 0.7184 | 0.2816 | 0.5139 | 0.4861 | -0.2045 | 0.2892 |
| Marker121551 | Chr1 | 21071599 | 21071906 | 53  | 61 | 26  | 63  | 0.4649 | 0.5351 | 0.2921 | 0.7079 | -0.1728 | 0.2444 |
| Marker146327 | Chr1 | 21081615 | 21081903 | 69  | 47 | 43  | 47  | 0.5948 | 0.4052 | 0.4778 | 0.5222 | -0.117  | 0.1655 |
| Marker148570 | Chr1 | 21087720 | 21087991 | 25  | 12 | 8   | 13  | 0.6757 | 0.3243 | 0.381  | 0.619  | -0.2947 | 0.4168 |
| Marker102909 | Chr1 | 21093607 | 21093919 | 52  | 58 | 20  | 25  | 0.4727 | 0.5273 | 0.4444 | 0.5556 | -0.0283 | 0.04   |
| Marker142137 | Chr1 | 21101087 | 21101454 | 3   | 8  | 6   | 5   | 0.2727 | 0.7273 | 0.5455 | 0.4545 | 0.2728  | 0.3858 |
| Marker127005 | Chr1 | 21176744 | 21177007 | 20  | 23 | 17  | 27  | 0.4651 | 0.5349 | 0.3864 | 0.6136 | -0.0787 | 0.1113 |
| Marker125315 | Chr1 | 21187669 | 21187953 | 51  | 36 | 12  | 38  | 0.5862 | 0.4138 | 0.24   | 0.76   | -0.3462 | 0.4896 |
| Marker124911 | Chr1 | 21189066 | 21189335 | 32  | 38 | 22  | 51  | 0.4571 | 0.5429 | 0.3014 | 0.6986 | -0.1557 | 0.2202 |
| Marker110378 | Chr1 | 21189338 | 21189658 | 43  | 17 | 20  | 38  | 0.7167 | 0.2833 | 0.3448 | 0.6552 | -0.3719 | 0.5259 |
| Marker139527 | Chr1 | 21233724 | 21234051 | 18  | 27 | 16  | 24  | 0.4    | 0.6    | 0.4    | 0.6    | 0       | 0      |
| Marker108333 | Chr1 | 21237552 | 21237854 | 44  | 68 | 47  | 66  | 0.3929 | 0.6071 | 0.4159 | 0.5841 | 0.023   | 0.0325 |
| Marker117561 | Chr1 | 21238638 | 21238958 | 47  | 17 | 16  | 15  | 0.7344 | 0.2656 | 0.5161 | 0.4839 | -0.2183 | 0.3087 |
| Marker111906 | Chr1 | 21239796 | 21240075 | 30  | 22 | 10  | 29  | 0.5769 | 0.4231 | 0.2564 | 0.7436 | -0.3205 | 0.4533 |
| Marker133654 | Chr1 | 21241564 | 21241926 | 39  | 19 | 11  | 32  | 0.6724 | 0.3276 | 0.2558 | 0.7442 | -0.4166 | 0.5892 |
| Marker112054 | Chr1 | 21244225 | 21244512 | 48  | 31 | 31  | 47  | 0.6076 | 0.3924 | 0.3974 | 0.6026 | -0.2102 | 0.2973 |
| Marker124722 | Chr1 | 21250045 | 21250307 | 3   | 6  | 3   | 10  | 0.3333 | 0.6667 | 0.2308 | 0.7692 | -0.1025 | 0.145  |
| Marker111165 | Chr1 | 21303838 | 21304169 | 26  | 7  | 19  | 19  | 0.7879 | 0.2121 | 0.5    | 0.5    | -0.2879 | 0.4072 |
| Marker129694 | Chr1 | 21312892 | 21313197 | 107 | 60 | 57  | 67  | 0.6407 | 0.3593 | 0.4597 | 0.5403 | -0.181  | 0.256  |
| Marker107244 | Chr1 | 21315130 | 21315448 | 49  | 32 | 36  | 57  | 0.6049 | 0.3951 | 0.3871 | 0.6129 | -0.2178 | 0.308  |
| Marker126859 | Chr1 | 21344504 | 21344797 | 34  | 24 | 34  | 43  | 0.5862 | 0.4138 | 0.4416 | 0.5584 | -0.1446 | 0.2045 |
| Marker113588 | Chr1 | 21390135 | 21390417 | 30  | 12 | 12  | 26  | 0.7143 | 0.2857 | 0.3158 | 0.6842 | -0.3985 | 0.5636 |
| Marker117697 | Chr1 | 21422100 | 21422369 | 51  | 44 | 29  | 46  | 0.5368 | 0.4632 | 0.3867 | 0.6133 | -0.1501 | 0.2123 |
| Marker122564 | Chr1 | 21584463 | 21584802 | 45  | 30 | 30  | 72  | 0.6    | 0.4    | 0.2941 | 0.7059 | -0.3059 | 0.4326 |
| Marker140764 | Chr1 | 21592291 | 21592614 | 46  | 39 | 15  | 42  | 0.5412 | 0.4588 | 0.2632 | 0.7368 | -0.278  | 0.3932 |
| Marker146534 | Chr1 | 21862284 | 21862547 | 30  | 29 | 13  | 19  | 0.5085 | 0.4915 | 0.4062 | 0.5938 | -0.1023 | 0.1447 |

|              |      |          |          |     |     |    |     |        |        |         |        |         |        |
|--------------|------|----------|----------|-----|-----|----|-----|--------|--------|---------|--------|---------|--------|
| Marker145263 | Chr1 | 22637147 | 22637411 | 55  | 27  | 20 | 31  | 0.6707 | 0.3293 | 0.3922  | 0.6078 | -0.2785 | 0.3939 |
| Marker102501 | Chr1 | 22639931 | 22640281 | 21  | 10  | 6  | 2   | 0.6774 | 0.3226 | 0.75    | 0.25   | 0.0726  | 0.1027 |
| Marker132484 | Chr1 | 22642970 | 22643259 | 28  | 20  | 20 | 41  | 0.5833 | 0.4167 | 0.26279 | 0.6721 | -0.2554 | 0.3612 |
| Marker148586 | Chr1 | 22661395 | 22661755 | 7   | 8   | 1  | 10  | 0.4667 | 0.5333 | 0.0909  | 0.9091 | -0.3758 | 0.5315 |
| Marker102011 | Chr1 | 22665449 | 22665725 | 21  | 10  | 16 | 15  | 0.6774 | 0.3226 | 0.5161  | 0.4839 | -0.1613 | 0.2281 |
| Marker129422 | Chr1 | 22793458 | 22793702 | 10  | 20  | 12 | 18  | 0.3333 | 0.6667 | 0.4     | 0.6    | 0.0667  | 0.0943 |
| Marker113159 | Chr1 | 22949956 | 22950292 | 48  | 39  | 9  | 53  | 0.5517 | 0.4483 | 0.1452  | 0.8548 | -0.4065 | 0.5749 |
| Marker111067 | Chr1 | 22951289 | 22951630 | 21  | 15  | 15 | 25  | 0.5833 | 0.4167 | 0.375   | 0.625  | -0.2083 | 0.2946 |
| Marker116933 | Chr1 | 22955294 | 22955556 | 24  | 17  | 6  | 8   | 0.5854 | 0.4146 | 0.4286  | 0.5714 | -0.1568 | 0.2217 |
| Marker146903 | Chr1 | 22972307 | 22972621 | 10  | 18  | 7  | 13  | 0.3571 | 0.6429 | 0.35    | 0.65   | -0.0071 | 0.01   |
| Marker134067 | Chr1 | 23007528 | 23007849 | 33  | 54  | 13 | 25  | 0.3793 | 0.6207 | 0.3421  | 0.6579 | -0.0372 | 0.0526 |
| Marker131392 | Chr1 | 23020339 | 23020617 | 31  | 35  | 17 | 36  | 0.4697 | 0.5303 | 0.3208  | 0.6792 | -0.1489 | 0.2106 |
| Marker119043 | Chr1 | 23126497 | 23126754 | 22  | 7   | 23 | 12  | 0.7586 | 0.2414 | 0.6571  | 0.3429 | -0.1015 | 0.1435 |
| Marker134703 | Chr1 | 23150111 | 23150454 | 63  | 37  | 52 | 37  | 0.63   | 0.37   | 0.5843  | 0.4157 | -0.0457 | 0.0646 |
| Marker143482 | Chr1 | 23154818 | 23155069 | 9   | 5   | 5  | 2   | 0.6429 | 0.3571 | 0.7143  | 0.2857 | 0.0714  | 0.101  |
| Marker104359 | Chr1 | 23238706 | 23238981 | 39  | 44  | 30 | 64  | 0.4699 | 0.5301 | 0.3191  | 0.6809 | -0.1508 | 0.2133 |
| Marker134553 | Chr1 | 23239672 | 23239949 | 52  | 30  | 18 | 44  | 0.6341 | 0.3659 | 0.2903  | 0.7097 | -0.3438 | 0.4862 |
| Marker146324 | Chr1 | 23615706 | 23615987 | 58  | 111 | 40 | 84  | 0.3432 | 0.6568 | 0.3226  | 0.6774 | -0.0206 | 0.0291 |
| Marker108188 | Chr1 | 24045414 | 24045763 | 14  | 17  | 2  | 20  | 0.4516 | 0.5484 | 0.0909  | 0.9091 | -0.3607 | 0.5101 |
| Marker128579 | Chr1 | 24100977 | 24101241 | 17  | 35  | 15 | 23  | 0.3269 | 0.6731 | 0.3947  | 0.6053 | 0.0678  | 0.0959 |
| Marker138041 | Chr1 | 24139046 | 24139397 | 12  | 17  | 15 | 26  | 0.4138 | 0.5862 | 0.3659  | 0.6341 | -0.0479 | 0.0677 |
| Marker142938 | Chr1 | 24178989 | 24179322 | 18  | 11  | 7  | 19  | 0.6207 | 0.3793 | 0.2692  | 0.7308 | -0.3515 | 0.4971 |
| Marker126193 | Chr1 | 24228376 | 24228664 | 119 | 58  | 81 | 100 | 0.6723 | 0.3277 | 0.4475  | 0.5525 | -0.2248 | 0.3179 |
| Marker135483 | Chr1 | 24249258 | 24249535 | 37  | 47  | 28 | 49  | 0.4405 | 0.5595 | 0.3636  | 0.6364 | -0.0769 | 0.1088 |
| Marker122262 | Chr1 | 24327885 | 24328213 | 25  | 24  | 10 | 13  | 0.5102 | 0.4898 | 0.4348  | 0.5652 | -0.0754 | 0.1066 |
| Marker120217 | Chr1 | 24329892 | 24330224 | 40  | 30  | 25 | 46  | 0.5714 | 0.4286 | 0.3521  | 0.6479 | -0.2193 | 0.3101 |
| Marker102437 | Chr1 | 24545671 | 24545971 | 14  | 16  | 10 | 14  | 0.4667 | 0.5333 | 0.4167  | 0.5833 | -0.05   | 0.0707 |
| Marker123542 | Chr1 | 24549459 | 24549728 | 43  | 47  | 20 | 26  | 0.4778 | 0.5222 | 0.4348  | 0.5652 | -0.043  | 0.0608 |
| Marker141252 | Chr1 | 24695887 | 24696175 | 57  | 39  | 27 | 43  | 0.5938 | 0.4062 | 0.3857  | 0.6143 | -0.2081 | 0.2943 |
| Marker121647 | Chr1 | 24707035 | 24707316 | 43  | 13  | 19 | 23  | 0.7679 | 0.2321 | 0.4524  | 0.5476 | -0.3155 | 0.4462 |
| Marker118304 | Chr1 | 24707469 | 24707815 | 25  | 8   | 12 | 12  | 0.7576 | 0.2424 | 0.5     | 0.5    | -0.2576 | 0.3643 |
| Marker119437 | Chr1 | 24719965 | 24720281 | 53  | 27  | 33 | 40  | 0.6625 | 0.3375 | 0.4521  | 0.5479 | -0.2104 | 0.2976 |
| Marker114353 | Chr1 | 24823500 | 24823752 | 24  | 12  | 15 | 19  | 0.6667 | 0.3333 | 0.4412  | 0.5588 | -0.2255 | 0.3189 |
| Marker111693 | Chr1 | 24843916 | 24844229 | 53  | 42  | 23 | 43  | 0.5579 | 0.4421 | 0.3485  | 0.6515 | -0.2094 | 0.2961 |
| Marker127630 | Chr1 | 24848916 | 24849132 | 9   | 8   | 4  | 7   | 0.5294 | 0.4706 | 0.3636  | 0.6364 | -0.1658 | 0.2345 |
| Marker128432 | Chr1 | 24863546 | 24863878 | 31  | 32  | 14 | 21  | 0.4921 | 0.5079 | 0.4     | 0.6    | -0.0921 | 0.1302 |
| Marker105213 | Chr1 | 24864938 | 24865216 | 42  | 77  | 56 | 79  | 0.3529 | 0.6471 | 0.4148  | 0.5852 | 0.0619  | 0.0875 |
| Marker102130 | Chr1 | 24867553 | 24867826 | 62  | 69  | 36 | 40  | 0.4733 | 0.5267 | 0.4737  | 0.5263 | 0.0004  | 0.0006 |
| Marker118568 | Chr1 | 24872488 | 24872786 | 56  | 47  | 44 | 82  | 0.5437 | 0.4563 | 0.3492  | 0.6508 | -0.1945 | 0.2751 |
| Marker148039 | Chr1 | 24922458 | 24922767 | 52  | 70  | 36 | 40  | 0.4262 | 0.5738 | 0.4737  | 0.5263 | 0.0475  | 0.0672 |
| Marker134647 | Chr1 | 24936101 | 24936378 | 50  | 38  | 15 | 38  | 0.5682 | 0.4318 | 0.283   | 0.717  | -0.2852 | 0.4033 |
| Marker103655 | Chr1 | 24937759 | 24938022 | 6   | 14  | 8  | 11  | 0.3    | 0.7    | 0.4211  | 0.5789 | 0.1211  | 0.1713 |
| Marker120180 | Chr1 | 24938342 | 24938595 | 5   | 5   | 7  | 14  | 0.5    | 0.5    | 0.3333  | 0.6667 | -0.1667 | 0.2357 |
| Marker115888 | Chr1 | 24942812 | 24943084 | 23  | 37  | 31 | 42  | 0.3833 | 0.6167 | 0.4247  | 0.5753 | 0.0414  | 0.0585 |
| Marker125104 | Chr1 | 24947262 | 24947566 | 71  | 94  | 51 | 89  | 0.4303 | 0.5697 | 0.3643  | 0.6357 | -0.066  | 0.0933 |
| Marker104406 | Chr1 | 24954058 | 24954324 | 22  | 23  | 11 | 20  | 0.4889 | 0.5111 | 0.3548  | 0.6452 | -0.1341 | 0.1896 |
| Marker114514 | Chr1 | 24959001 | 24959333 | 49  | 47  | 40 | 37  | 0.5104 | 0.4896 | 0.5195  | 0.4805 | 0.0091  | 0.0129 |
| Marker129834 | Chr1 | 24962909 | 24963167 | 5   | 8   | 7  | 8   | 0.3846 | 0.6154 | 0.4667  | 0.5333 | 0.0821  | 0.1161 |
| Marker133843 | Chr1 | 24984565 | 24984821 | 15  | 39  | 13 | 26  | 0.2778 | 0.7222 | 0.3333  | 0.6667 | 0.0555  | 0.0785 |
| Marker109556 | Chr1 | 24997451 | 24997765 | 89  | 86  | 80 | 114 | 0.5086 | 0.4914 | 0.4124  | 0.5876 | -0.0962 | 0.136  |
| Marker116734 | Chr1 | 25007011 | 25007303 | 41  | 56  | 17 | 31  | 0.4227 | 0.5773 | 0.3542  | 0.6458 | -0.0685 | 0.0969 |
| Marker141013 | Chr1 | 25007328 | 25007648 | 15  | 11  | 9  | 17  | 0.5769 | 0.4231 | 0.3462  | 0.6538 | -0.2307 | 0.3263 |
| Marker140557 | Chr1 | 25017310 | 25017641 | 10  | 17  | 9  | 15  | 0.3704 | 0.6296 | 0.375   | 0.625  | 0.0046  | 0.0065 |
| Marker121451 | Chr1 | 25017644 | 25017903 | 19  | 21  | 6  | 20  | 0.475  | 0.525  | 0.2308  | 0.7692 | -0.2442 | 0.3454 |
| Marker139150 | Chr1 | 25130150 | 25130495 | 9   | 4   | 6  | 13  | 0.6923 | 0.3077 | 0.3158  | 0.6842 | -0.3765 | 0.5325 |
| Marker142811 | Chr1 | 25130498 | 25130802 | 14  | 41  | 22 | 27  | 0.2545 | 0.7455 | 0.449   | 0.551  | 0.1945  | 0.2751 |
| Marker122837 | Chr1 | 25137776 | 25138059 | 64  | 82  | 53 | 88  | 0.4384 | 0.5616 | 0.3759  | 0.6241 | -0.0625 | 0.0884 |
| Marker119232 | Chr1 | 25157773 | 25158057 | 50  | 41  | 23 | 33  | 0.5495 | 0.4505 | 0.4107  | 0.5893 | -0.1388 | 0.1963 |
| Marker104013 | Chr1 | 26714248 | 26714492 | 10  | 12  | 11 | 9   | 0.4545 | 0.5455 | 0.55    | 0.45   | 0.0955  | 0.1351 |
| Marker123895 | Chr1 | 26806870 | 26807209 | 22  | 16  | 12 | 20  | 0.5789 | 0.4211 | 0.375   | 0.625  | -0.2039 | 0.2884 |
| Marker148369 | Chr1 | 27000663 | 27000934 | 54  | 18  | 38 | 9   | 0.75   | 0.25   | 0.8085  | 0.1915 | 0.0585  | 0.0827 |
| Marker130696 | Chr1 | 27446459 | 27446717 | 22  | 16  | 14 | 8   | 0.5789 | 0.4211 | 0.6364  | 0.3636 | 0.0575  | 0.0813 |
| Marker120298 | Chr1 | 27446720 | 27447009 | 36  | 23  | 19 | 23  | 0.6102 | 0.3898 | 0.4524  | 0.5476 | -0.1578 | 0.2232 |
| Marker107398 | Chr1 | 27448833 | 27449107 | 113 | 43  | 54 | 47  | 0.7244 | 0.2756 | 0.5347  | 0.4653 | -0.1897 | 0.2683 |
| Marker107167 | Chr1 | 28223081 | 28223374 | 25  | 40  | 18 | 23  | 0.3846 | 0.6154 | 0.439   | 0.561  | 0.0544  | 0.0769 |
| Marker138404 | Chr1 | 28233477 | 28233815 | 15  | 19  | 6  | 15  | 0.4412 | 0.5588 | 0.2857  | 0.7143 | -0.1555 | 0.2199 |
| Marker134946 | Chr1 | 28242635 | 28242920 | 46  | 59  | 29 | 43  | 0.4381 | 0.5619 | 0.4028  | 0.5972 | -0.0353 | 0.0499 |
| Marker141695 | Chr1 | 28250154 | 28250422 | 45  | 62  | 27 | 28  | 0.4206 | 0.5794 | 0.4909  | 0.5091 | 0.0703  | 0.0994 |
| Marker124284 | Chr1 | 28251750 | 28252058 | 57  | 80  | 45 | 72  | 0.4161 | 0.5839 | 0.3846  | 0.6154 | -0.0315 | 0.0445 |
| Marker130940 | Chr1 | 28253256 | 28253532 | 33  | 35  | 22 | 22  | 0.4853 | 0.5147 | 0.5     | 0.5    | 0.0147  | 0.0208 |
| Marker116335 | Chr1 | 28260466 | 28260756 | 24  | 30  | 22 | 32  | 0.4444 | 0.5556 | 0.4074  | 0.5926 | -0.037  | 0.0523 |
| Marker103247 | Chr1 | 28263456 | 28263771 | 20  | 45  | 23 | 31  | 0.3077 | 0.6923 | 0.4259  | 0.5741 | 0.1182  | 0.1672 |
| Marker105696 | Chr1 | 28268196 | 28268515 | 24  | 39  | 31 | 40  | 0.381  | 0.619  | 0.4366  | 0.5634 | 0.0556  | 0.0786 |
| Marker114188 | Chr1 | 28298283 | 28298629 | 23  | 21  | 17 | 23  | 0.5227 | 0.4773 | 0.425   | 0.575  | -0.0977 | 0.1382 |
| Marker136182 | Chr1 | 28346456 | 28346808 | 23  | 35  | 25 | 24  | 0.3966 | 0.6034 | 0.5102  | 0.4898 | 0.1136  | 0.1607 |
| Marker120507 | Chr1 | 28352118 | 28352474 | 32  | 21  | 37 | 32  | 0.6038 | 0.3962 | 0.5362  | 0.4638 | -0.0676 | 0.0956 |
| Marker144024 | Chr1 | 28359480 | 28359742 | 6   | 12  | 8  | 8   | 0.3333 | 0.6667 | 0.5     | 0.5    | 0.1667  | 0.2357 |
| Marker140959 | Chr1 | 28367959 | 28368284 | 61  | 62  | 47 | 59  | 0.4959 | 0.5041 | 0.4434  | 0.5566 | -0.0525 | 0.0742 |
| Marker126302 | Chr1 | 28378911 | 28379251 | 36  | 37  | 36 | 38  | 0.4932 | 0.5068 | 0.4865  | 0.5135 | -0.0067 | 0.0095 |
| Marker132004 | Chr1 | 28383149 | 28383488 | 31  | 34  | 16 | 35  | 0.4769 | 0.5231 | 0.3137  | 0.6863 | -0.1632 | 0.2308 |
| Marker139539 | Chr1 | 28383845 | 28384119 | 41  | 78  | 31 | 56  | 0.3445 | 0.6555 | 0.3563  | 0.6437 | 0.0118  | 0.0167 |
| Marker117847 | Chr1 | 28388831 | 28389181 | 14  | 9   | 10 | 7   | 0.6087 | 0.3913 | 0.5882  | 0.4118 | -0.0205 | 0.029  |

|              |      |          |          |     |     |    |     |        |        |        |        |         |        |
|--------------|------|----------|----------|-----|-----|----|-----|--------|--------|--------|--------|---------|--------|
| Marker137439 | Chr1 | 28395968 | 28396322 | 24  | 40  | 20 | 31  | 0.375  | 0.625  | 0.3922 | 0.6078 | 0.0172  | 0.0243 |
| Marker116655 | Chr1 | 28407274 | 28407595 | 23  | 61  | 20 | 48  | 0.2738 | 0.7262 | 0.2941 | 0.7059 | 0.0203  | 0.0287 |
| Marker143459 | Chr1 | 28577223 | 28577584 | 19  | 30  | 21 | 14  | 0.3878 | 0.6122 | 0.6    | 0.4    | 0.2122  | 0.3001 |
| Marker131412 | Chr1 | 28586865 | 28587142 | 24  | 33  | 21 | 19  | 0.4211 | 0.5789 | 0.525  | 0.475  | 0.1039  | 0.1469 |
| Marker144231 | Chr1 | 28589004 | 28589276 | 60  | 72  | 34 | 93  | 0.4545 | 0.5455 | 0.2677 | 0.7323 | -0.1868 | 0.2642 |
| Marker115822 | Chr1 | 28611276 | 28611549 | 26  | 28  | 10 | 23  | 0.4815 | 0.5185 | 0.303  | 0.697  | -0.1785 | 0.2524 |
| Marker118632 | Chr1 | 28611552 | 28611845 | 40  | 51  | 19 | 53  | 0.4396 | 0.5604 | 0.2639 | 0.7361 | -0.1757 | 0.2485 |
| Marker118901 | Chr1 | 28616025 | 28616290 | 23  | 24  | 11 | 26  | 0.4894 | 0.5106 | 0.2973 | 0.7027 | -0.1921 | 0.2717 |
| Marker105858 | Chr1 | 28635482 | 28635759 | 18  | 55  | 41 | 36  | 0.2466 | 0.7534 | 0.5325 | 0.4675 | 0.2859  | 0.4043 |
| Marker138748 | Chr1 | 28643083 | 28643388 | 55  | 61  | 27 | 54  | 0.4741 | 0.5259 | 0.3333 | 0.6667 | -0.1408 | 0.1991 |
| Marker115133 | Chr1 | 28643391 | 28643701 | 26  | 28  | 22 | 38  | 0.4815 | 0.5185 | 0.3667 | 0.6333 | -0.1148 | 0.1624 |
| Marker113883 | Chr1 | 28653847 | 28654192 | 27  | 33  | 25 | 21  | 0.45   | 0.55   | 0.5435 | 0.4565 | 0.0935  | 0.1322 |
| Marker107102 | Chr1 | 28668716 | 28669012 | 37  | 36  | 23 | 60  | 0.5068 | 0.4932 | 0.2771 | 0.7229 | -0.2297 | 0.3248 |
| Marker124902 | Chr1 | 28673888 | 28674217 | 19  | 23  | 14 | 13  | 0.4524 | 0.5476 | 0.5185 | 0.4815 | 0.0661  | 0.0935 |
| Marker136569 | Chr1 | 28738522 | 28738791 | 26  | 43  | 28 | 49  | 0.3768 | 0.6232 | 0.3636 | 0.6364 | -0.0132 | 0.0187 |
| Marker104170 | Chr1 | 28760840 | 28761166 | 47  | 33  | 48 | 45  | 0.5875 | 0.4125 | 0.5161 | 0.4839 | -0.0714 | 0.101  |
| Marker132342 | Chr1 | 28788444 | 28788767 | 36  | 49  | 21 | 36  | 0.4235 | 0.5765 | 0.3684 | 0.6316 | -0.0551 | 0.0779 |
| Marker116740 | Chr1 | 28792123 | 28792410 | 12  | 21  | 13 | 15  | 0.3636 | 0.6364 | 0.4643 | 0.5357 | 0.1007  | 0.1424 |
| Marker135925 | Chr1 | 28807310 | 28807653 | 9   | 19  | 6  | 10  | 0.3214 | 0.6786 | 0.375  | 0.625  | 0.0536  | 0.0758 |
| Marker105418 | Chr1 | 28817485 | 28817756 | 39  | 42  | 27 | 25  | 0.4815 | 0.5185 | 0.5192 | 0.4808 | 0.0377  | 0.0533 |
| Marker123543 | Chr1 | 28820179 | 28820467 | 50  | 48  | 38 | 47  | 0.5102 | 0.4898 | 0.4471 | 0.5529 | -0.0631 | 0.0892 |
| Marker103225 | Chr1 | 28820470 | 28820743 | 52  | 61  | 46 | 54  | 0.4602 | 0.5398 | 0.46   | 0.54   | -0.0002 | 0.0003 |
| Marker123803 | Chr1 | 28821134 | 28821410 | 22  | 37  | 46 | 31  | 0.3729 | 0.6271 | 0.5974 | 0.4026 | 0.2245  | 0.3175 |
| Marker139102 | Chr1 | 28821788 | 28822024 | 6   | 6   | 6  | 2   | 0.5    | 0.5    | 0.75   | 0.25   | 0.25    | 0.3536 |
| Marker129427 | Chr1 | 28827028 | 28827320 | 19  | 26  | 24 | 30  | 0.4222 | 0.5778 | 0.4444 | 0.5556 | 0.0222  | 0.0314 |
| Marker114671 | Chr1 | 28842945 | 28843239 | 66  | 125 | 65 | 113 | 0.3455 | 0.6545 | 0.3652 | 0.6348 | 0.0197  | 0.0279 |
| Marker125579 | Chr1 | 28843242 | 28843573 | 40  | 59  | 46 | 67  | 0.404  | 0.596  | 0.4071 | 0.5929 | 0.0031  | 0.0044 |
| Marker123640 | Chr1 | 28863317 | 28863589 | 31  | 19  | 25 | 24  | 0.62   | 0.38   | 0.5102 | 0.4898 | -0.1098 | 0.1553 |
| Marker121505 | Chr1 | 28868044 | 28868408 | 17  | 15  | 19 | 18  | 0.5312 | 0.4688 | 0.5135 | 0.4865 | -0.0177 | 0.025  |
| Marker131664 | Chr1 | 28881569 | 28881855 | 32  | 55  | 27 | 39  | 0.3678 | 0.6322 | 0.4091 | 0.5909 | 0.0413  | 0.0584 |
| Marker110369 | Chr1 | 28907297 | 28907598 | 27  | 35  | 38 | 47  | 0.4355 | 0.5645 | 0.4471 | 0.5529 | 0.0116  | 0.0164 |
| Marker129082 | Chr1 | 28922926 | 28923260 | 41  | 48  | 19 | 38  | 0.4607 | 0.5393 | 0.3333 | 0.6667 | -0.1274 | 0.1802 |
| Marker130479 | Chr1 | 28927434 | 28927721 | 31  | 57  | 27 | 39  | 0.3523 | 0.6477 | 0.4091 | 0.5909 | 0.0568  | 0.0803 |
| Marker106780 | Chr1 | 28931037 | 28931315 | 32  | 36  | 22 | 14  | 0.4706 | 0.5294 | 0.6111 | 0.3889 | 0.1405  | 0.1987 |
| Marker140012 | Chr1 | 29068723 | 29069069 | 17  | 44  | 33 | 20  | 0.2787 | 0.7213 | 0.6226 | 0.3774 | 0.3439  | 0.4863 |
| Marker90373  | Chr2 | 19992    | 20284    | 89  | 44  | 56 | 35  | 0.6692 | 0.3308 | 0.6154 | 0.3846 | -0.0538 | 0.0761 |
| Marker82399  | Chr2 | 148120   | 148367   | 7   | 3   | 2  | 4   | 0.7    | 0.3    | 0.3333 | 0.6667 | -0.3667 | 0.5186 |
| Marker66328  | Chr2 | 333051   | 333329   | 57  | 42  | 51 | 22  | 0.5758 | 0.4242 | 0.6986 | 0.3014 | 0.1228  | 0.1737 |
| Marker70273  | Chr2 | 338708   | 338987   | 65  | 60  | 50 | 51  | 0.52   | 0.48   | 0.495  | 0.505  | -0.025  | 0.0354 |
| Marker77256  | Chr2 | 343794   | 344061   | 33  | 18  | 13 | 28  | 0.6471 | 0.3529 | 0.3171 | 0.6829 | -0.33   | 0.4667 |
| Marker83069  | Chr2 | 347268   | 347606   | 55  | 32  | 32 | 33  | 0.6322 | 0.3678 | 0.4923 | 0.5077 | -0.1399 | 0.1978 |
| Marker95058  | Chr2 | 375444   | 375689   | 7   | 4   | 11 | 8   | 0.6364 | 0.3636 | 0.5789 | 0.4211 | -0.0575 | 0.0813 |
| Marker76406  | Chr2 | 812540   | 812835   | 28  | 22  | 16 | 9   | 0.56   | 0.44   | 0.64   | 0.36   | 0.08    | 0.1131 |
| Marker79516  | Chr2 | 1043340  | 1043599  | 11  | 4   | 3  | 4   | 0.7333 | 0.2667 | 0.4286 | 0.5714 | -0.3047 | 0.4309 |
| Marker79463  | Chr2 | 1054602  | 1054891  | 66  | 18  | 36 | 8   | 0.7857 | 0.2143 | 0.8182 | 0.1818 | 0.0325  | 0.046  |
| Marker78203  | Chr2 | 1117983  | 1118292  | 41  | 20  | 34 | 19  | 0.6721 | 0.3279 | 0.6415 | 0.3585 | -0.0306 | 0.0433 |
| Marker98690  | Chr2 | 1280247  | 1280520  | 70  | 22  | 48 | 44  | 0.7609 | 0.2391 | 0.5217 | 0.4783 | -0.2392 | 0.3383 |
| Marker99972  | Chr2 | 1288136  | 1288418  | 67  | 63  | 61 | 44  | 0.5154 | 0.4846 | 0.581  | 0.419  | 0.0656  | 0.0928 |
| Marker67937  | Chr2 | 1329588  | 1329872  | 46  | 6   | 25 | 15  | 0.8846 | 0.1154 | 0.625  | 0.375  | -0.2596 | 0.3671 |
| Marker67650  | Chr2 | 1675124  | 1675405  | 75  | 43  | 60 | 31  | 0.6356 | 0.3644 | 0.6593 | 0.3407 | 0.0237  | 0.0335 |
| Marker89505  | Chr2 | 1764288  | 1764618  | 34  | 18  | 28 | 6   | 0.6538 | 0.3462 | 0.8235 | 0.1765 | 0.1697  | 0.24   |
| Marker76178  | Chr2 | 1838196  | 1838530  | 22  | 9   | 25 | 14  | 0.7097 | 0.2903 | 0.641  | 0.359  | -0.0687 | 0.0972 |
| Marker81413  | Chr2 | 1916769  | 1917058  | 84  | 51  | 47 | 41  | 0.6222 | 0.3778 | 0.5341 | 0.4659 | -0.0881 | 0.1246 |
| Marker79426  | Chr2 | 2073384  | 2073709  | 42  | 27  | 40 | 16  | 0.6087 | 0.3913 | 0.7143 | 0.2857 | 0.1056  | 0.1493 |
| Marker71412  | Chr2 | 2075208  | 2075464  | 14  | 8   | 7  | 13  | 0.6364 | 0.3636 | 0.35   | 0.65   | -0.2864 | 0.405  |
| Marker96940  | Chr2 | 2077427  | 2077759  | 18  | 10  | 9  | 14  | 0.6429 | 0.3571 | 0.3913 | 0.6087 | -0.2516 | 0.3558 |
| Marker99090  | Chr2 | 2349168  | 2349461  | 142 | 112 | 92 | 146 | 0.5591 | 0.4409 | 0.3866 | 0.6134 | -0.1725 | 0.244  |
| Marker85075  | Chr2 | 2352247  | 2352618  | 14  | 11  | 2  | 12  | 0.56   | 0.44   | 0.1429 | 0.8571 | -0.4171 | 0.5899 |
| Marker92384  | Chr2 | 2356693  | 2357018  | 47  | 27  | 19 | 30  | 0.6351 | 0.3649 | 0.3878 | 0.6122 | -0.2473 | 0.3497 |
| Marker73154  | Chr2 | 2357805  | 2358095  | 31  | 29  | 28 | 24  | 0.5167 | 0.4833 | 0.5385 | 0.4615 | 0.0218  | 0.0308 |
| Marker94600  | Chr2 | 2387656  | 2387918  | 43  | 18  | 16 | 36  | 0.7049 | 0.2951 | 0.3077 | 0.6923 | -0.3972 | 0.5617 |
| Marker73330  | Chr2 | 2401323  | 2401565  | 13  | 7   | 6  | 7   | 0.65   | 0.35   | 0.4615 | 0.5385 | -0.1885 | 0.2666 |
| Marker92803  | Chr2 | 2461723  | 2461982  | 26  | 12  | 32 | 18  | 0.6842 | 0.3158 | 0.64   | 0.36   | -0.0442 | 0.0625 |
| Marker99339  | Chr2 | 2502085  | 2502434  | 15  | 2   | 12 | 9   | 0.8824 | 0.1176 | 0.5714 | 0.4286 | -0.311  | 0.4398 |
| Marker81382  | Chr2 | 2525079  | 2525339  | 25  | 6   | 12 | 9   | 0.8065 | 0.1935 | 0.5714 | 0.4286 | -0.2351 | 0.3325 |
| Marker79722  | Chr2 | 2536988  | 2537297  | 55  | 18  | 26 | 18  | 0.7534 | 0.2466 | 0.5909 | 0.4091 | -0.1625 | 0.2298 |
| Marker88500  | Chr2 | 3475566  | 3475875  | 39  | 25  | 31 | 21  | 0.6094 | 0.3906 | 0.5962 | 0.4038 | -0.0132 | 0.0187 |
| Marker98193  | Chr2 | 3614576  | 3614940  | 10  | 3   | 22 | 7   | 0.7692 | 0.2308 | 0.7586 | 0.2414 | -0.0106 | 0.015  |
| Marker71243  | Chr2 | 3653305  | 3653562  | 26  | 7   | 18 | 2   | 0.7879 | 0.2121 | 0.9    | 0.1    | 0.1121  | 0.1585 |
| Marker79066  | Chr2 | 3660300  | 3660614  | 88  | 20  | 93 | 15  | 0.8148 | 0.1852 | 0.8611 | 0.1389 | 0.0463  | 0.0655 |
| Marker77972  | Chr2 | 3754708  | 3754982  | 24  | 5   | 13 | 6   | 0.8276 | 0.1724 | 0.6842 | 0.3158 | -0.1434 | 0.2028 |
| Marker94801  | Chr2 | 4255389  | 4255653  | 29  | 3   | 14 | 2   | 0.9062 | 0.0938 | 0.875  | 0.125  | -0.0312 | 0.0441 |
| Marker93161  | Chr2 | 4305831  | 4306176  | 28  | 13  | 29 | 4   | 0.6829 | 0.3171 | 0.8788 | 0.1212 | 0.1959  | 0.277  |
| Marker85324  | Chr2 | 4308776  | 4309044  | 24  | 21  | 13 | 8   | 0.5333 | 0.4667 | 0.619  | 0.381  | 0.0857  | 0.1212 |
| Marker93302  | Chr2 | 4324611  | 4324890  | 13  | 46  | 12 | 20  | 0.2203 | 0.7797 | 0.375  | 0.625  | 0.1547  | 0.2188 |
| Marker98017  | Chr2 | 4337389  | 4337686  | 105 | 44  | 97 | 18  | 0.7047 | 0.2953 | 0.8435 | 0.1565 | 0.1388  | 0.1963 |
| Marker97205  | Chr2 | 4366169  | 4366454  | 22  | 9   | 17 | 0   | 0.7097 | 0.2903 | 1      | 0      | 0.2903  | 0.4105 |
| Marker101612 | Chr2 | 4395253  | 4395576  | 27  | 32  | 51 | 4   | 0.4576 | 0.5424 | 0.9273 | 0.0727 | 0.4697  | 0.6643 |
| Marker73169  | Chr2 | 4404859  | 4405178  | 42  | 14  | 36 | 9   | 0.75   | 0.25   | 0.8    | 0.2    | 0.05    | 0.0707 |
| Marker99123  | Chr2 | 4412753  | 4413007  | 34  | 8   | 33 | 10  | 0.8095 | 0.1905 | 0.7674 | 0.2326 | -0.0421 | 0.0595 |
| Marker96342  | Chr2 | 4417992  | 4418334  | 48  | 22  | 42 | 8   | 0.6857 | 0.3143 | 0.84   | 0.16   | 0.1543  | 0.2182 |
| Marker94108  | Chr2 | 4419871  | 4420177  | 90  | 30  | 67 | 14  | 0.75   | 0.25   | 0.8272 | 0.1728 | 0.0772  | 0.1092 |

|              |      |         |         |    |    |     |    |        |        |        |        |         |        |
|--------------|------|---------|---------|----|----|-----|----|--------|--------|--------|--------|---------|--------|
| Marker84496  | Chr2 | 4423528 | 4423856 | 86 | 41 | 102 | 11 | 0.6772 | 0.3228 | 0.9027 | 0.0973 | 0.2255  | 0.3189 |
| Marker67362  | Chr2 | 4483889 | 4484216 | 53 | 20 | 46  | 8  | 0.726  | 0.274  | 0.8519 | 0.1481 | 0.1259  | 0.178  |
| Marker78298  | Chr2 | 4484606 | 4484956 | 19 | 11 | 27  | 6  | 0.6333 | 0.3667 | 0.8182 | 0.1818 | 0.1849  | 0.2615 |
| Marker71789  | Chr2 | 4487597 | 4487950 | 10 | 6  | 7   | 0  | 0.625  | 0.375  | 1      | 0      | 0.375   | 0.5303 |
| Marker99842  | Chr2 | 4490883 | 4491181 | 97 | 45 | 99  | 9  | 0.6831 | 0.3169 | 0.9167 | 0.0833 | 0.2336  | 0.3304 |
| Marker77111  | Chr2 | 4494320 | 4494618 | 56 | 32 | 55  | 8  | 0.6364 | 0.3636 | 0.873  | 0.127  | 0.2366  | 0.3346 |
| Marker77215  | Chr2 | 4496609 | 4496870 | 18 | 5  | 12  | 3  | 0.7826 | 0.2174 | 0.8    | 0.2    | 0.0174  | 0.0246 |
| Marker99687  | Chr2 | 4506429 | 4506757 | 33 | 33 | 29  | 26 | 0.5    | 0.5    | 0.5273 | 0.4727 | 0.0273  | 0.0386 |
| Marker75262  | Chr2 | 4508826 | 4509177 | 22 | 6  | 24  | 3  | 0.7857 | 0.2143 | 0.8889 | 0.1111 | 0.1032  | 0.1459 |
| Marker99921  | Chr2 | 4509191 | 4509462 | 18 | 2  | 17  | 3  | 0.9    | 0.1    | 0.85   | 0.15   | -0.05   | 0.0707 |
| Marker84162  | Chr2 | 4509908 | 4510262 | 12 | 10 | 13  | 6  | 0.5455 | 0.4545 | 0.6842 | 0.3158 | 0.1387  | 0.1962 |
| Marker79589  | Chr2 | 4531684 | 4532032 | 38 | 27 | 55  | 0  | 0.5846 | 0.4154 | 1      | 0      | 0.4154  | 0.5875 |
| Marker83947  | Chr2 | 4532035 | 4532306 | 15 | 13 | 16  | 4  | 0.5357 | 0.4643 | 0.8    | 0.2    | 0.2643  | 0.3738 |
| Marker70483  | Chr2 | 4546330 | 4546656 | 55 | 25 | 67  | 12 | 0.6875 | 0.3125 | 0.8481 | 0.1519 | 0.1606  | 0.2271 |
| Marker83778  | Chr2 | 4548829 | 4549121 | 60 | 28 | 97  | 5  | 0.6818 | 0.3182 | 0.951  | 0.049  | 0.2692  | 0.3807 |
| Marker73498  | Chr2 | 4557881 | 4558178 | 44 | 21 | 51  | 7  | 0.6769 | 0.3231 | 0.8793 | 0.1207 | 0.2024  | 0.2862 |
| Marker100379 | Chr2 | 4567304 | 4567618 | 52 | 21 | 60  | 4  | 0.7123 | 0.2877 | 0.9375 | 0.0625 | 0.2252  | 0.3185 |
| Marker80096  | Chr2 | 4594426 | 4594707 | 47 | 11 | 59  | 8  | 0.8103 | 0.1897 | 0.8806 | 0.1194 | 0.0703  | 0.0994 |
| Marker77113  | Chr2 | 4597886 | 4598219 | 67 | 32 | 63  | 9  | 0.6768 | 0.3232 | 0.875  | 0.125  | 0.1982  | 0.2803 |
| Marker79965  | Chr2 | 4603823 | 4604081 | 35 | 14 | 22  | 1  | 0.7143 | 0.2857 | 0.9565 | 0.0435 | 0.2422  | 0.3425 |
| Marker95446  | Chr2 | 4667796 | 4668037 | 11 | 8  | 7   | 4  | 0.5789 | 0.4211 | 0.6364 | 0.3636 | 0.0575  | 0.0813 |
| Marker88739  | Chr2 | 4684621 | 4684954 | 36 | 16 | 37  | 2  | 0.6923 | 0.3077 | 0.9487 | 0.0513 | 0.2564  | 0.3626 |
| Marker96058  | Chr2 | 4691949 | 4692244 | 53 | 32 | 30  | 11 | 0.6235 | 0.3765 | 0.7317 | 0.2683 | 0.1082  | 0.153  |
| Marker70773  | Chr2 | 5030327 | 5030600 | 53 | 5  | 45  | 1  | 0.9138 | 0.0862 | 0.9783 | 0.0217 | 0.0645  | 0.0912 |
| Marker78823  | Chr2 | 5034421 | 5034707 | 51 | 24 | 49  | 5  | 0.68   | 0.32   | 0.9074 | 0.0926 | 0.2274  | 0.3216 |
| Marker84295  | Chr2 | 5595439 | 5595698 | 18 | 6  | 9   | 2  | 0.75   | 0.25   | 0.8182 | 0.1818 | 0.0682  | 0.0964 |
| Marker93412  | Chr2 | 5656561 | 5656789 | 12 | 9  | 19  | 1  | 0.5714 | 0.4286 | 0.95   | 0.05   | 0.3786  | 0.5354 |
| Marker83091  | Chr2 | 5720029 | 5720314 | 85 | 49 | 140 | 17 | 0.6343 | 0.3657 | 0.8917 | 0.1083 | 0.2574  | 0.364  |
| Marker86902  | Chr2 | 5726742 | 5727052 | 16 | 8  | 23  | 5  | 0.6667 | 0.3333 | 0.8214 | 0.1786 | 0.1547  | 0.2188 |
| Marker78001  | Chr2 | 5753190 | 5753555 | 16 | 10 | 23  | 0  | 0.6154 | 0.3846 | 1      | 0      | 0.3846  | 0.5439 |
| Marker91191  | Chr2 | 5765696 | 5765999 | 47 | 22 | 57  | 6  | 0.6812 | 0.3188 | 0.9048 | 0.0952 | 0.2236  | 0.3162 |
| Marker87525  | Chr2 | 5773338 | 5773651 | 75 | 33 | 47  | 9  | 0.6944 | 0.3056 | 0.8393 | 0.1607 | 0.1449  | 0.2049 |
| Marker84381  | Chr2 | 5813531 | 5813787 | 12 | 3  | 7   | 3  | 0.8    | 0.2    | 0.7    | 0.3    | -0.1    | 0.1414 |
| Marker72784  | Chr2 | 5817841 | 5818172 | 26 | 17 | 13  | 7  | 0.6047 | 0.3953 | 0.65   | 0.35   | 0.0453  | 0.0641 |
| Marker70673  | Chr2 | 5846236 | 5846575 | 43 | 9  | 29  | 15 | 0.8269 | 0.1731 | 0.6591 | 0.3409 | -0.1678 | 0.2373 |
| Marker75291  | Chr2 | 6052146 | 6052434 | 79 | 89 | 54  | 71 | 0.4702 | 0.5298 | 0.432  | 0.568  | -0.0382 | 0.054  |
| Marker75784  | Chr2 | 6056878 | 6057199 | 31 | 34 | 26  | 28 | 0.4769 | 0.5231 | 0.4815 | 0.5185 | 0.0046  | 0.0065 |
| Marker95650  | Chr2 | 6130637 | 6130914 | 25 | 27 | 13  | 16 | 0.4808 | 0.5192 | 0.4483 | 0.5517 | -0.0325 | 0.046  |
| Marker71088  | Chr2 | 6133746 | 6134016 | 30 | 40 | 43  | 16 | 0.4286 | 0.5714 | 0.7288 | 0.2712 | 0.3002  | 0.4245 |
| Marker97233  | Chr2 | 6135833 | 6136132 | 94 | 72 | 62  | 60 | 0.5663 | 0.4337 | 0.5082 | 0.4918 | -0.0581 | 0.0822 |
| Marker90933  | Chr2 | 6136135 | 6136486 | 44 | 48 | 59  | 45 | 0.4783 | 0.5217 | 0.5673 | 0.4327 | 0.089   | 0.1259 |
| Marker95691  | Chr2 | 6140761 | 6141078 | 24 | 34 | 29  | 36 | 0.4138 | 0.5862 | 0.4462 | 0.5538 | 0.0324  | 0.0458 |
| Marker69324  | Chr2 | 6235996 | 6236263 | 48 | 32 | 28  | 29 | 0.6    | 0.4    | 0.4912 | 0.5088 | -0.1088 | 0.1539 |
| Marker93781  | Chr2 | 6239608 | 6239882 | 33 | 19 | 27  | 21 | 0.6346 | 0.3654 | 0.5625 | 0.4375 | -0.0721 | 0.102  |
| Marker92289  | Chr2 | 6244273 | 6244573 | 39 | 56 | 33  | 28 | 0.4105 | 0.5895 | 0.541  | 0.459  | 0.1305  | 0.1846 |
| Marker74399  | Chr2 | 6248707 | 6248967 | 8  | 5  | 8   | 4  | 0.6154 | 0.3846 | 0.6667 | 0.3333 | 0.0513  | 0.0725 |
| Marker89705  | Chr2 | 6384819 | 6385124 | 37 | 36 | 49  | 29 | 0.5068 | 0.4932 | 0.6282 | 0.3718 | 0.1214  | 0.1717 |
| Marker96316  | Chr2 | 6408585 | 6408855 | 94 | 76 | 72  | 56 | 0.5529 | 0.4471 | 0.5625 | 0.4375 | 0.0096  | 0.0136 |
| Marker86995  | Chr2 | 6411945 | 6412221 | 40 | 58 | 40  | 33 | 0.4082 | 0.5918 | 0.5479 | 0.4521 | 0.1397  | 0.1976 |
| Marker75017  | Chr2 | 6412224 | 6412498 | 43 | 31 | 35  | 22 | 0.5811 | 0.4189 | 0.614  | 0.386  | 0.0329  | 0.0465 |
| Marker73241  | Chr2 | 6417346 | 6417614 | 22 | 30 | 14  | 32 | 0.4231 | 0.5769 | 0.3043 | 0.6957 | -0.1188 | 0.168  |
| Marker82522  | Chr2 | 6479345 | 6479683 | 43 | 41 | 65  | 17 | 0.5119 | 0.4881 | 0.7927 | 0.2073 | 0.2808  | 0.3971 |
| Marker99695  | Chr2 | 6499170 | 6499524 | 12 | 14 | 7   | 4  | 0.4615 | 0.5385 | 0.6364 | 0.3636 | 0.1749  | 0.2473 |
| Marker95728  | Chr2 | 6505590 | 6505887 | 30 | 11 | 21  | 8  | 0.7317 | 0.2683 | 0.7241 | 0.2759 | -0.0076 | 0.0107 |
| Marker83208  | Chr2 | 6505890 | 6506129 | 6  | 11 | 5   | 4  | 0.3529 | 0.6471 | 0.5556 | 0.4444 | 0.2027  | 0.2867 |
| Marker93071  | Chr2 | 6515242 | 6515581 | 16 | 5  | 9   | 3  | 0.7619 | 0.2381 | 0.75   | 0.25   | -0.0119 | 0.0168 |
| Marker70144  | Chr2 | 6522774 | 6523043 | 39 | 28 | 31  | 26 | 0.5821 | 0.4179 | 0.5439 | 0.4561 | -0.0382 | 0.054  |
| Marker89196  | Chr2 | 6527110 | 6527393 | 34 | 47 | 54  | 38 | 0.4198 | 0.5802 | 0.587  | 0.413  | 0.1672  | 0.2365 |
| Marker98838  | Chr2 | 6533552 | 6533861 | 38 | 46 | 38  | 42 | 0.4524 | 0.5476 | 0.475  | 0.525  | 0.0226  | 0.032  |
| Marker100679 | Chr2 | 6534511 | 6534814 | 49 | 33 | 52  | 41 | 0.5976 | 0.4024 | 0.5591 | 0.4409 | -0.0385 | 0.0544 |
| Marker80239  | Chr2 | 6534817 | 6535073 | 12 | 25 | 12  | 11 | 0.3243 | 0.6757 | 0.5217 | 0.4783 | 0.1974  | 0.2792 |
| Marker97294  | Chr2 | 6553229 | 6553576 | 23 | 28 | 18  | 13 | 0.451  | 0.549  | 0.5806 | 0.4194 | 0.1296  | 0.1833 |
| Marker82651  | Chr2 | 6584697 | 6585062 | 8  | 4  | 8   | 1  | 0.6667 | 0.3333 | 0.8889 | 0.1111 | 0.2222  | 0.3142 |
| Marker66049  | Chr2 | 6946174 | 6946494 | 29 | 9  | 21  | 19 | 0.7632 | 0.2368 | 0.525  | 0.475  | -0.2382 | 0.3369 |
| Marker99668  | Chr2 | 6950471 | 6950720 | 8  | 4  | 12  | 3  | 0.6667 | 0.3333 | 0.8    | 0.2    | 0.1333  | 0.1885 |
| Marker68454  | Chr2 | 7128226 | 7128462 | 14 | 17 | 16  | 6  | 0.4516 | 0.5484 | 0.7273 | 0.2727 | 0.2757  | 0.3899 |
| Marker84868  | Chr2 | 7511533 | 7511792 | 15 | 3  | 12  | 1  | 0.8333 | 0.1667 | 0.9231 | 0.0769 | 0.0898  | 0.127  |
| Marker74576  | Chr2 | 7797157 | 7797387 | 10 | 6  | 5   | 4  | 0.625  | 0.375  | 0.5556 | 0.4444 | -0.0694 | 0.0981 |
| Marker74146  | Chr2 | 8988755 | 8988938 | 13 | 11 | 14  | 3  | 0.5417 | 0.4583 | 0.8235 | 0.1765 | 0.2818  | 0.3985 |
| Marker71822  | Chr2 | 9316095 | 9316348 | 5  | 8  | 8   | 3  | 0.3846 | 0.6154 | 0.7273 | 0.2727 | 0.3427  | 0.4847 |
| Marker73159  | Chr2 | 9344289 | 9344543 | 13 | 5  | 8   | 8  | 0.7222 | 0.2778 | 0.5    | 0.5    | -0.2222 | 0.3142 |
| Marker72393  | Chr2 | 9353591 | 9353904 | 19 | 29 | 23  | 11 | 0.3958 | 0.6042 | 0.6765 | 0.3235 | 0.2807  | 0.397  |
| Marker71102  | Chr2 | 9357023 | 9357320 | 32 | 36 | 25  | 18 | 0.4706 | 0.5294 | 0.5814 | 0.4186 | 0.1108  | 0.1567 |
| Marker67074  | Chr2 | 9362680 | 9362958 | 41 | 36 | 42  | 30 | 0.5325 | 0.4675 | 0.5833 | 0.4167 | 0.0508  | 0.0718 |
| Marker65935  | Chr2 | 9370091 | 9370390 | 35 | 29 | 29  | 17 | 0.5469 | 0.4531 | 0.6304 | 0.3696 | 0.0835  | 0.1181 |
| Marker95521  | Chr2 | 9398572 | 9398877 | 73 | 47 | 56  | 65 | 0.6083 | 0.3917 | 0.4628 | 0.5372 | -0.1455 | 0.2058 |
| Marker71981  | Chr2 | 9398880 | 9399146 | 46 | 25 | 56  | 27 | 0.6479 | 0.3521 | 0.6747 | 0.3253 | 0.0268  | 0.0379 |
| Marker87646  | Chr2 | 9414690 | 9415042 | 17 | 16 | 9   | 7  | 0.5152 | 0.4848 | 0.5625 | 0.4375 | 0.0473  | 0.0669 |
| Marker100823 | Chr2 | 9422936 | 9423268 | 22 | 30 | 32  | 23 | 0.4231 | 0.5769 | 0.5818 | 0.4182 | 0.1587  | 0.2244 |
| Marker93840  | Chr2 | 9431967 | 9432241 | 88 | 67 | 51  | 48 | 0.5677 | 0.4323 | 0.5152 | 0.4848 | -0.0525 | 0.0742 |
| Marker99672  | Chr2 | 9541383 | 9541666 | 36 | 24 | 21  | 13 | 0.6    | 0.4    | 0.6176 | 0.3824 | 0.0176  | 0.0249 |
| Marker83452  | Chr2 | 9544715 | 9545024 | 52 | 40 | 28  | 26 | 0.5652 | 0.4348 | 0.5185 | 0.4815 | -0.0467 | 0.066  |

|              |      |          |          |     |    |    |    |        |        |          |        |         |        |
|--------------|------|----------|----------|-----|----|----|----|--------|--------|----------|--------|---------|--------|
| Marker67308  | Chr2 | 9547107  | 9547400  | 42  | 59 | 61 | 29 | 0.4158 | 0.5842 | 0.6778   | 0.3222 | 0.262   | 0.3705 |
| Marker83256  | Chr2 | 9549181  | 9549539  | 11  | 10 | 5  | 3  | 0.5238 | 0.4762 | 0.625    | 0.375  | 0.1012  | 0.1431 |
| Marker75367  | Chr2 | 9556405  | 9556690  | 74  | 60 | 48 | 56 | 0.5522 | 0.4478 | 0.4615   | 0.5385 | -0.0907 | 0.1283 |
| Marker88841  | Chr2 | 9561592  | 9561897  | 27  | 26 | 30 | 15 | 0.5094 | 0.4906 | 0.6667   | 0.3333 | 0.1573  | 0.2225 |
| Marker89445  | Chr2 | 9564089  | 9564371  | 49  | 57 | 32 | 28 | 0.4623 | 0.5377 | 0.5333   | 0.4667 | 0.071   | 0.1004 |
| Marker97758  | Chr2 | 9578986  | 9579282  | 57  | 55 | 48 | 25 | 0.5089 | 0.4911 | 0.6575   | 0.3425 | 0.1486  | 0.2102 |
| Marker71530  | Chr2 | 9579418  | 9579621  | 6   | 5  | 5  | 4  | 0.5455 | 0.4545 | 0.5556   | 0.4444 | 0.0101  | 0.0143 |
| Marker68116  | Chr2 | 9588937  | 9589302  | 20  | 16 | 16 | 15 | 0.5556 | 0.4444 | 0.5161   | 0.4839 | -0.0395 | 0.0559 |
| Marker92517  | Chr2 | 9589305  | 9589644  | 74  | 48 | 55 | 29 | 0.6066 | 0.3934 | 0.6548   | 0.3452 | 0.0482  | 0.0682 |
| Marker97393  | Chr2 | 9598313  | 9598616  | 49  | 56 | 24 | 23 | 0.4667 | 0.5333 | 0.5106   | 0.4894 | 0.0439  | 0.0621 |
| Marker77514  | Chr2 | 9600883  | 9601157  | 51  | 31 | 38 | 40 | 0.622  | 0.378  | 0.4872   | 0.5128 | -0.1348 | 0.1906 |
| Marker88955  | Chr2 | 9602513  | 9602840  | 96  | 70 | 78 | 51 | 0.5783 | 0.4217 | 0.6047   | 0.3953 | 0.0264  | 0.0373 |
| Marker100091 | Chr2 | 9606768  | 9607019  | 4   | 8  | 3  | 1  | 0.3333 | 0.6667 | 0.75     | 0.25   | 0.4167  | 0.5893 |
| Marker76053  | Chr2 | 9613606  | 9613927  | 37  | 39 | 35 | 34 | 0.4868 | 0.5132 | 0.5072   | 0.4928 | 0.0204  | 0.0288 |
| Marker69525  | Chr2 | 9614620  | 9614878  | 15  | 8  | 10 | 8  | 0.6522 | 0.3478 | 0.5556   | 0.4444 | -0.0966 | 0.1366 |
| Marker92089  | Chr2 | 9653874  | 9654191  | 38  | 19 | 33 | 10 | 0.6667 | 0.3333 | 0.7674   | 0.2326 | 0.1007  | 0.1424 |
| Marker82201  | Chr2 | 9684506  | 9684846  | 8   | 7  | 12 | 4  | 0.5333 | 0.4667 | 0.75     | 0.25   | 0.2167  | 0.3065 |
| Marker87150  | Chr2 | 9752765  | 9753052  | 22  | 30 | 34 | 23 | 0.4231 | 0.5769 | 0.5965   | 0.4035 | 0.1734  | 0.2452 |
| Marker83056  | Chr2 | 9768967  | 9769295  | 22  | 11 | 22 | 10 | 0.6667 | 0.3333 | 0.6875   | 0.3125 | 0.0208  | 0.0294 |
| Marker82695  | Chr2 | 9802586  | 9802932  | 37  | 31 | 27 | 22 | 0.5441 | 0.4559 | 0.551    | 0.449  | 0.0069  | 0.0098 |
| Marker93330  | Chr2 | 9808076  | 9808368  | 81  | 48 | 47 | 32 | 0.6279 | 0.3721 | 0.5949   | 0.4051 | -0.033  | 0.0467 |
| Marker89070  | Chr2 | 9853146  | 9853378  | 11  | 5  | 5  | 6  | 0.6875 | 0.3125 | 0.4545   | 0.5455 | -0.233  | 0.3295 |
| Marker97676  | Chr2 | 9959101  | 9959459  | 18  | 7  | 11 | 9  | 0.72   | 0.28   | 0.55     | 0.45   | -0.17   | 0.2404 |
| Marker81612  | Chr2 | 9968189  | 9968490  | 16  | 10 | 25 | 17 | 0.6154 | 0.3846 | 0.5952   | 0.4048 | -0.0202 | 0.0286 |
| Marker99962  | Chr2 | 10044357 | 10044659 | 61  | 29 | 36 | 41 | 0.6778 | 0.3222 | 0.4675   | 0.5325 | -0.2103 | 0.2974 |
| Marker66902  | Chr2 | 10051686 | 10051964 | 34  | 29 | 16 | 11 | 0.5397 | 0.4603 | 0.5926   | 0.4074 | 0.0529  | 0.0748 |
| Marker96067  | Chr2 | 10101664 | 10101996 | 11  | 10 | 18 | 8  | 0.5238 | 0.4762 | 0.6923   | 0.3077 | 0.1685  | 0.2383 |
| Marker66785  | Chr2 | 10138872 | 10139167 | 31  | 24 | 25 | 29 | 0.5636 | 0.4364 | 0.463    | 0.537  | -0.1006 | 0.1423 |
| Marker99644  | Chr2 | 10166857 | 10167189 | 12  | 8  | 6  | 18 | 0.6    | 0.4    | 0.25     | 0.75   | -0.35   | 0.495  |
| Marker92022  | Chr2 | 10190809 | 10191124 | 47  | 45 | 45 | 31 | 0.5109 | 0.4891 | 0.5921   | 0.4079 | 0.0812  | 0.1148 |
| Marker72049  | Chr2 | 10209852 | 10210192 | 107 | 70 | 83 | 65 | 0.6045 | 0.3955 | 0.5608   | 0.4392 | -0.0437 | 0.0618 |
| Marker74163  | Chr2 | 10333099 | 10333443 | 17  | 18 | 10 | 17 | 0.4857 | 0.5143 | 0.3704   | 0.6296 | -0.1153 | 0.1631 |
| Marker67091  | Chr2 | 10335405 | 10335709 | 99  | 61 | 61 | 64 | 0.6188 | 0.3812 | 0.488    | 0.512  | -0.1308 | 0.185  |
| Marker71286  | Chr2 | 10355019 | 10355272 | 9   | 11 | 5  | 14 | 0.45   | 0.55   | 0.2632   | 0.7368 | -0.1868 | 0.2642 |
| Marker76155  | Chr2 | 10360721 | 10360972 | 6   | 8  | 7  | 7  | 0.4286 | 0.5714 | 0.5      | 0.5    | 0.0714  | 0.101  |
| Marker70533  | Chr2 | 10363609 | 10363860 | 9   | 5  | 10 | 10 | 0.6429 | 0.3571 | 0.5      | 0.5    | -0.1429 | 0.2021 |
| Marker101132 | Chr2 | 10413958 | 10414232 | 86  | 38 | 37 | 27 | 0.6935 | 0.3065 | 0.5781   | 0.4219 | -0.1154 | 0.1632 |
| Marker71899  | Chr2 | 10488869 | 10489187 | 26  | 14 | 19 | 13 | 0.65   | 0.35   | 0.5938   | 0.4062 | -0.0562 | 0.0795 |
| Marker67312  | Chr2 | 10592448 | 10592802 | 39  | 4  | 26 | 8  | 0.907  | 0.093  | 0.7647   | 0.2353 | -0.1423 | 0.2012 |
| Marker86450  | Chr2 | 10655946 | 10656146 | 12  | 9  | 5  | 6  | 0.5714 | 0.4286 | 0.4545   | 0.5455 | -0.1169 | 0.1653 |
| Marker67058  | Chr2 | 10725015 | 10725362 | 20  | 8  | 8  | 14 | 0.7143 | 0.2857 | 0.3636   | 0.6364 | -0.3507 | 0.496  |
| Marker71617  | Chr2 | 10849175 | 10849487 | 27  | 24 | 19 | 16 | 0.5294 | 0.4706 | 0.5429   | 0.4571 | 0.0135  | 0.0191 |
| Marker84243  | Chr2 | 10885341 | 10885692 | 23  | 7  | 11 | 14 | 0.7667 | 0.2333 | 0.44     | 0.56   | -0.3267 | 0.462  |
| Marker65639  | Chr2 | 10890195 | 10890504 | 50  | 32 | 31 | 48 | 0.6098 | 0.3902 | 0.3924   | 0.6076 | -0.2174 | 0.3075 |
| Marker78843  | Chr2 | 10890867 | 10891184 | 63  | 60 | 52 | 43 | 0.5122 | 0.4878 | 0.5474   | 0.4526 | 0.0352  | 0.0498 |
| Marker90869  | Chr2 | 10893370 | 10893654 | 66  | 41 | 55 | 59 | 0.6168 | 0.3832 | 0.4825   | 0.5175 | -0.1343 | 0.1899 |
| Marker82944  | Chr2 | 10940418 | 10940713 | 33  | 29 | 38 | 22 | 0.5323 | 0.4677 | 0.6333   | 0.3667 | 0.101   | 0.1428 |
| Marker69575  | Chr2 | 10942940 | 10943195 | 23  | 17 | 22 | 20 | 0.575  | 0.425  | 0.5238   | 0.4762 | -0.0512 | 0.0724 |
| Marker98953  | Chr2 | 10960022 | 10960282 | 8   | 5  | 11 | 10 | 0.6154 | 0.3846 | 0.5238   | 0.4762 | -0.0916 | 0.1295 |
| Marker74924  | Chr2 | 10972134 | 10972494 | 11  | 16 | 7  | 6  | 0.4074 | 0.5926 | 0.5385   | 0.4615 | 0.1311  | 0.1854 |
| Marker88770  | Chr2 | 10974425 | 10974772 | 47  | 36 | 31 | 31 | 0.5663 | 0.4337 | 0.5      | 0.5    | -0.0663 | 0.0938 |
| Marker99367  | Chr2 | 10974807 | 10975150 | 47  | 33 | 27 | 32 | 0.5875 | 0.4125 | 0.4576   | 0.5424 | -0.1299 | 0.1837 |
| Marker84677  | Chr2 | 10999101 | 10999405 | 14  | 14 | 8  | 15 | 0.5    | 0.5    | 0.3478   | 0.6522 | -0.1522 | 0.2152 |
| Marker94378  | Chr2 | 10999761 | 11000092 | 47  | 29 | 14 | 19 | 0.6184 | 0.3816 | 0.4242   | 0.5758 | -0.1942 | 0.2746 |
| Marker86020  | Chr2 | 11014574 | 11014829 | 7   | 11 | 9  | 15 | 0.3889 | 0.6111 | 0.375    | 0.625  | -0.0139 | 0.0197 |
| Marker96920  | Chr2 | 11031466 | 11031748 | 47  | 28 | 48 | 37 | 0.6267 | 0.3733 | 0.5647   | 0.4353 | -0.062  | 0.0877 |
| Marker79119  | Chr2 | 11032913 | 11033148 | 9   | 5  | 7  | 10 | 0.6429 | 0.3571 | 0.4118   | 0.5882 | -0.2311 | 0.3268 |
| Marker98615  | Chr2 | 11033696 | 11033980 | 35  | 37 | 36 | 37 | 0.4861 | 0.5139 | 0.4932   | 0.5068 | 0.0071  | 0.01   |
| Marker91289  | Chr2 | 11064028 | 11064295 | 16  | 15 | 19 | 11 | 0.5161 | 0.4839 | 0.6333   | 0.3667 | 0.1172  | 0.1657 |
| Marker75297  | Chr2 | 11107999 | 11108282 | 50  | 41 | 44 | 34 | 0.5495 | 0.4505 | 0.5641   | 0.4359 | 0.0146  | 0.0206 |
| Marker66800  | Chr2 | 11130156 | 11130495 | 32  | 13 | 28 | 23 | 0.7111 | 0.2889 | 0.549    | 0.451  | -0.1621 | 0.2292 |
| Marker89606  | Chr2 | 11151841 | 11152139 | 88  | 55 | 74 | 55 | 0.6154 | 0.3846 | 0.5736   | 0.4264 | -0.0418 | 0.0591 |
| Marker97494  | Chr2 | 11152675 | 11152972 | 62  | 60 | 36 | 43 | 0.5082 | 0.4918 | 0.4557   | 0.5443 | -0.0525 | 0.0742 |
| Marker95817  | Chr2 | 11168711 | 11168986 | 22  | 31 | 22 | 32 | 0.4151 | 0.5849 | 0.4074   | 0.5926 | -0.0077 | 0.0109 |
| Marker99208  | Chr2 | 11172447 | 11172720 | 58  | 39 | 30 | 31 | 0.5979 | 0.4021 | 0.4918   | 0.5082 | -0.1061 | 0.15   |
| Marker98257  | Chr2 | 11223148 | 11223387 | 2   | 6  | 4  | 2  | 0.25   | 0.75   | 0.6667   | 0.3333 | 0.4167  | 0.5893 |
| Marker100997 | Chr2 | 11257525 | 11257866 | 41  | 36 | 42 | 47 | 0.5325 | 0.4675 | 0.4719   | 0.5281 | -0.0606 | 0.0857 |
| Marker71310  | Chr2 | 11257933 | 11258241 | 78  | 41 | 53 | 48 | 0.6555 | 0.3445 | 0.5248   | 0.4752 | -0.1307 | 0.1848 |
| Marker66127  | Chr2 | 11259499 | 11259751 | 11  | 16 | 4  | 14 | 0.4074 | 0.5926 | 0.2222   | 0.7778 | -0.1852 | 0.2619 |
| Marker77952  | Chr2 | 11273990 | 11274291 | 45  | 22 | 29 | 23 | 0.6716 | 0.3284 | 0.5577   | 0.4423 | -0.1139 | 0.1611 |
| Marker90215  | Chr2 | 11274294 | 11274563 | 31  | 22 | 23 | 27 | 0.5849 | 0.4151 | 0.46     | 0.54   | -0.1249 | 0.1766 |
| Marker80874  | Chr2 | 11274566 | 11274743 | 8   | 5  | 10 | 10 | 0.6154 | 0.3846 | 0.5      | 0.5    | -0.1154 | 0.1632 |
| Marker70853  | Chr2 | 11275680 | 11275958 | 44  | 48 | 42 | 31 | 0.4783 | 0.5217 | 0.5753   | 0.4247 | 0.097   | 0.1372 |
| Marker97474  | Chr2 | 11276607 | 11276883 | 61  | 46 | 36 | 50 | 0.5701 | 0.4299 | 0.4186   | 0.5814 | -0.1515 | 0.2143 |
| Marker100286 | Chr2 | 11276900 | 11277214 | 98  | 51 | 83 | 75 | 0.6577 | 0.3423 | 0.5253   | 0.4747 | -0.1324 | 0.1872 |
| Marker98207  | Chr2 | 11293831 | 11294030 | 8   | 7  | 4  | 9  | 0.5333 | 0.4667 | 0.129077 | 0.6923 | -0.2256 | 0.319  |
| Marker101004 | Chr2 | 11308854 | 11309159 | 131 | 78 | 82 | 69 | 0.6268 | 0.3732 | 0.543    | 0.457  | -0.0838 | 0.1185 |
| Marker93665  | Chr2 | 11324413 | 11324683 | 38  | 38 | 57 | 40 | 0.5    | 0.5    | 0.5876   | 0.4124 | 0.0876  | 0.1239 |
| Marker76245  | Chr2 | 11325471 | 11325802 | 66  | 42 | 45 | 30 | 0.6111 | 0.3889 | 0.6      | 0.4    | -0.0111 | 0.0157 |
| Marker87521  | Chr2 | 11354853 | 11355173 | 30  | 23 | 23 | 32 | 0.566  | 0.434  | 0.4182   | 0.5818 | -0.1478 | 0.209  |
| Marker73843  | Chr2 | 12206501 | 12206783 | 42  | 9  | 43 | 9  | 0.8235 | 0.1765 | 0.8269   | 0.1731 | 0.0034  | 0.0048 |
| Marker92763  | Chr2 | 12480208 | 12480556 | 18  | 21 | 15 | 10 | 0.4615 | 0.5385 | 0.6      | 0.4    | 0.1385  | 0.1959 |

|              |      |          |          |     |     |     |     |        |        |        |        |         |        |
|--------------|------|----------|----------|-----|-----|-----|-----|--------|--------|--------|--------|---------|--------|
| Marker92747  | Chr2 | 12491850 | 12492112 | 39  | 27  | 51  | 36  | 0.5909 | 0.4091 | 0.5862 | 0.4138 | -0.0047 | 0.0066 |
| Marker91018  | Chr2 | 12505602 | 12505917 | 8   | 5   | 11  | 1   | 0.6154 | 0.3846 | 0.9167 | 0.0833 | 0.3013  | 0.4261 |
| Marker100317 | Chr2 | 12537439 | 12537725 | 49  | 23  | 41  | 41  | 0.6806 | 0.3194 | 0.5    | 0.5    | -0.1806 | 0.2554 |
| Marker87065  | Chr2 | 12541032 | 12541379 | 18  | 2   | 13  | 4   | 0.9    | 0.1    | 0.7647 | 0.2353 | -0.1353 | 0.1913 |
| Marker73260  | Chr2 | 12562383 | 12562652 | 34  | 30  | 14  | 17  | 0.5312 | 0.4688 | 0.4516 | 0.5484 | -0.0796 | 0.1126 |
| Marker95464  | Chr2 | 12578666 | 12578927 | 15  | 16  | 3   | 8   | 0.4839 | 0.5161 | 0.2727 | 0.7273 | -0.2112 | 0.2987 |
| Marker100614 | Chr2 | 12582303 | 12582615 | 93  | 121 | 84  | 102 | 0.4346 | 0.5654 | 0.4516 | 0.5484 | 0.017   | 0.024  |
| Marker97531  | Chr2 | 12593574 | 12593918 | 32  | 27  | 29  | 22  | 0.5424 | 0.4576 | 0.5686 | 0.4314 | 0.0262  | 0.0371 |
| Marker69310  | Chr2 | 12624111 | 12624419 | 9   | 0   | 5   | 4   | 1      | 0      | 0.5556 | 0.4444 | -0.4444 | 0.6285 |
| Marker69287  | Chr2 | 12631231 | 12631558 | 40  | 9   | 16  | 8   | 0.8163 | 0.1837 | 0.6667 | 0.3333 | -0.1496 | 0.2116 |
| Marker97254  | Chr2 | 12633263 | 12633510 | 19  | 3   | 4   | 1   | 0.8636 | 0.1364 | 0.8    | 0.2    | -0.0636 | 0.0899 |
| Marker88258  | Chr2 | 12634895 | 12635158 | 27  | 13  | 17  | 9   | 0.675  | 0.325  | 0.6538 | 0.3462 | -0.0212 | 0.03   |
| Marker75743  | Chr2 | 12675543 | 12675840 | 72  | 20  | 63  | 20  | 0.7826 | 0.2174 | 0.759  | 0.241  | -0.0236 | 0.0334 |
| Marker73979  | Chr2 | 12701220 | 12701562 | 61  | 6   | 23  | 9   | 0.9104 | 0.0896 | 0.7188 | 0.2812 | -0.1916 | 0.271  |
| Marker80139  | Chr2 | 12701565 | 12701883 | 43  | 7   | 37  | 13  | 0.86   | 0.14   | 0.74   | 0.26   | -0.12   | 0.1697 |
| Marker86463  | Chr2 | 12702777 | 12703031 | 36  | 7   | 43  | 9   | 0.8372 | 0.1628 | 0.8269 | 0.1731 | -0.0103 | 0.0146 |
| Marker79951  | Chr2 | 12821248 | 12821543 | 42  | 38  | 41  | 31  | 0.525  | 0.475  | 0.5694 | 0.4306 | 0.0444  | 0.0628 |
| Marker72043  | Chr2 | 12848204 | 12848539 | 27  | 6   | 8   | 6   | 0.8182 | 0.1818 | 0.5714 | 0.4286 | -0.2468 | 0.349  |
| Marker97190  | Chr2 | 12863375 | 12863686 | 54  | 28  | 28  | 22  | 0.6585 | 0.3415 | 0.56   | 0.44   | -0.0985 | 0.1393 |
| Marker80530  | Chr2 | 12871162 | 12871442 | 85  | 91  | 72  | 42  | 0.483  | 0.517  | 0.6316 | 0.3684 | 0.1486  | 0.2102 |
| Marker75133  | Chr2 | 12871537 | 12871833 | 34  | 40  | 31  | 28  | 0.4595 | 0.5405 | 0.5254 | 0.4746 | 0.0659  | 0.0932 |
| Marker72574  | Chr2 | 12899529 | 12899786 | 10  | 18  | 16  | 9   | 0.3571 | 0.6429 | 0.64   | 0.36   | 0.2829  | 0.4001 |
| Marker94662  | Chr2 | 12908596 | 12908931 | 25  | 5   | 23  | 8   | 0.8333 | 0.1667 | 0.7419 | 0.2581 | -0.0914 | 0.1293 |
| Marker100307 | Chr2 | 12911118 | 12911429 | 16  | 11  | 17  | 15  | 0.5926 | 0.4074 | 0.5312 | 0.4688 | -0.0614 | 0.0868 |
| Marker74568  | Chr2 | 12919137 | 12919428 | 22  | 19  | 14  | 25  | 0.5366 | 0.4634 | 0.359  | 0.641  | -0.1776 | 0.2512 |
| Marker83534  | Chr2 | 12929689 | 12930024 | 24  | 29  | 28  | 22  | 0.4528 | 0.5472 | 0.56   | 0.44   | 0.1072  | 0.1516 |
| Marker69226  | Chr2 | 12933892 | 12934160 | 35  | 35  | 31  | 28  | 0.5    | 0.5    | 0.5254 | 0.4746 | 0.0254  | 0.0359 |
| Marker83999  | Chr2 | 12939222 | 12939497 | 54  | 33  | 45  | 34  | 0.6207 | 0.3793 | 0.5696 | 0.4304 | -0.0511 | 0.0723 |
| Marker88694  | Chr2 | 12946252 | 12946598 | 13  | 15  | 14  | 15  | 0.4643 | 0.5357 | 0.4828 | 0.5172 | 0.0185  | 0.0262 |
| Marker99930  | Chr2 | 13042371 | 13042652 | 73  | 29  | 37  | 34  | 0.7157 | 0.2843 | 0.5211 | 0.4789 | -0.1946 | 0.2752 |
| Marker100216 | Chr2 | 13087527 | 13087849 | 38  | 49  | 47  | 31  | 0.4368 | 0.5632 | 0.6026 | 0.3974 | 0.1658  | 0.2345 |
| Marker85282  | Chr2 | 13165145 | 13165432 | 50  | 39  | 39  | 53  | 0.5618 | 0.4382 | 0.4239 | 0.5761 | -0.1379 | 0.195  |
| Marker99029  | Chr2 | 13442441 | 13442752 | 67  | 50  | 62  | 67  | 0.5726 | 0.4274 | 0.4806 | 0.5194 | -0.092  | 0.1301 |
| Marker99386  | Chr2 | 13447401 | 13447659 | 10  | 10  | 4   | 10  | 0.5    | 0.5    | 0.2857 | 0.7143 | -0.2143 | 0.3031 |
| Marker70116  | Chr2 | 13451766 | 13452050 | 50  | 16  | 23  | 29  | 0.7576 | 0.2424 | 0.4423 | 0.5577 | -0.3153 | 0.4459 |
| Marker82148  | Chr2 | 13466935 | 13467296 | 18  | 24  | 10  | 15  | 0.4286 | 0.5714 | 0.4    | 0.6    | -0.0286 | 0.0404 |
| Marker96393  | Chr2 | 13489081 | 13489428 | 29  | 6   | 18  | 8   | 0.8286 | 0.1714 | 0.6923 | 0.3077 | -0.1363 | 0.1928 |
| Marker93986  | Chr2 | 13506130 | 13506436 | 43  | 22  | 19  | 32  | 0.6615 | 0.3385 | 0.3725 | 0.6275 | -0.289  | 0.4087 |
| Marker95654  | Chr2 | 13508915 | 13509270 | 18  | 10  | 6   | 4   | 0.6429 | 0.3571 | 0.6    | 0.4    | -0.0429 | 0.0607 |
| Marker85390  | Chr2 | 13624842 | 13625122 | 67  | 42  | 36  | 28  | 0.6147 | 0.3853 | 0.5625 | 0.4375 | -0.0522 | 0.0738 |
| Marker85908  | Chr2 | 13667580 | 13667886 | 26  | 15  | 21  | 24  | 0.6341 | 0.3659 | 0.4667 | 0.5333 | -0.1674 | 0.2367 |
| Marker87827  | Chr2 | 13750853 | 13751150 | 75  | 38  | 45  | 34  | 0.6637 | 0.3363 | 0.5696 | 0.4304 | -0.0941 | 0.1331 |
| Marker96196  | Chr2 | 13758111 | 13758389 | 43  | 25  | 20  | 32  | 0.6324 | 0.3676 | 0.3846 | 0.6154 | -0.2478 | 0.3504 |
| Marker94980  | Chr2 | 13770149 | 13770452 | 55  | 25  | 24  | 34  | 0.6875 | 0.3125 | 0.4138 | 0.5862 | -0.2737 | 0.3871 |
| Marker93551  | Chr2 | 13778297 | 13778570 | 71  | 47  | 63  | 56  | 0.6017 | 0.3983 | 0.5294 | 0.4706 | -0.0723 | 0.1022 |
| Marker99770  | Chr2 | 13782156 | 13782508 | 32  | 14  | 19  | 20  | 0.6957 | 0.3043 | 0.4872 | 0.5128 | -0.2085 | 0.2949 |
| Marker85405  | Chr2 | 13787641 | 13787909 | 51  | 73  | 44  | 71  | 0.4113 | 0.5887 | 0.3826 | 0.6174 | -0.0287 | 0.0406 |
| Marker92051  | Chr2 | 13788087 | 13788429 | 38  | 41  | 30  | 36  | 0.481  | 0.519  | 0.4545 | 0.5455 | -0.0265 | 0.0375 |
| Marker97292  | Chr2 | 13804871 | 13805179 | 57  | 35  | 27  | 30  | 0.6196 | 0.3804 | 0.4737 | 0.5263 | -0.1459 | 0.2063 |
| Marker71529  | Chr2 | 13813117 | 13813477 | 10  | 10  | 3   | 5   | 0.5    | 0.5    | 0.375  | 0.625  | -0.125  | 0.1768 |
| Marker97838  | Chr2 | 13825988 | 13826253 | 23  | 23  | 17  | 14  | 0.5    | 0.5    | 0.5484 | 0.4516 | 0.0484  | 0.0684 |
| Marker74734  | Chr2 | 13904018 | 13904315 | 25  | 29  | 44  | 33  | 0.463  | 0.537  | 0.5714 | 0.4286 | 0.1084  | 0.1533 |
| Marker71779  | Chr2 | 13904318 | 13904612 | 59  | 37  | 51  | 42  | 0.6146 | 0.3854 | 0.5484 | 0.4516 | -0.0662 | 0.0936 |
| Marker91594  | Chr2 | 13911223 | 13911502 | 59  | 39  | 55  | 31  | 0.602  | 0.398  | 0.6395 | 0.3605 | 0.0375  | 0.053  |
| Marker94218  | Chr2 | 13912237 | 13912590 | 26  | 16  | 18  | 31  | 0.619  | 0.381  | 0.3673 | 0.6327 | -0.2517 | 0.356  |
| Marker75523  | Chr2 | 13914269 | 13914605 | 52  | 12  | 22  | 35  | 0.8125 | 0.1875 | 0.386  | 0.614  | -0.4265 | 0.6032 |
| Marker70739  | Chr2 | 13930085 | 13930391 | 39  | 38  | 35  | 52  | 0.5065 | 0.4935 | 0.4023 | 0.5977 | -0.1042 | 0.1474 |
| Marker78194  | Chr2 | 13940378 | 13940691 | 31  | 31  | 22  | 32  | 0.5    | 0.5    | 0.4074 | 0.5926 | -0.0926 | 0.131  |
| Marker79393  | Chr2 | 13947106 | 13947374 | 34  | 40  | 20  | 27  | 0.4595 | 0.5405 | 0.4255 | 0.5745 | -0.034  | 0.0481 |
| Marker85483  | Chr2 | 14031613 | 14031946 | 24  | 36  | 28  | 18  | 0.4    | 0.6    | 0.6087 | 0.3913 | 0.2087  | 0.2951 |
| Marker98684  | Chr2 | 14071204 | 14071514 | 42  | 37  | 44  | 25  | 0.5316 | 0.4684 | 0.6377 | 0.3623 | 0.1061  | 0.15   |
| Marker86599  | Chr2 | 14116002 | 14116296 | 88  | 98  | 80  | 92  | 0.4731 | 0.5269 | 0.4651 | 0.5349 | -0.008  | 0.0113 |
| Marker66724  | Chr2 | 14181644 | 14181972 | 59  | 54  | 51  | 51  | 0.5221 | 0.4779 | 0.5    | 0.5    | -0.0221 | 0.0313 |
| Marker72020  | Chr2 | 14200611 | 14200923 | 19  | 25  | 19  | 38  | 0.4318 | 0.5682 | 0.3333 | 0.6667 | -0.0985 | 0.1393 |
| Marker97712  | Chr2 | 14297498 | 14297802 | 38  | 18  | 17  | 19  | 0.6786 | 0.3214 | 0.4722 | 0.5278 | -0.2064 | 0.2919 |
| Marker93577  | Chr2 | 14321130 | 14321425 | 19  | 34  | 8   | 34  | 0.3585 | 0.6415 | 0.1905 | 0.8095 | -0.168  | 0.2376 |
| Marker85122  | Chr2 | 14523449 | 14523722 | 23  | 23  | 24  | 16  | 0.5    | 0.5    | 0.6    | 0.4    | 0.1     | 0.1414 |
| Marker92622  | Chr2 | 14526614 | 14526935 | 52  | 29  | 22  | 35  | 0.642  | 0.358  | 0.386  | 0.614  | -0.256  | 0.362  |
| Marker65943  | Chr2 | 14538280 | 14538531 | 24  | 5   | 7   | 3   | 0.8276 | 0.1724 | 0.7    | 0.3    | -0.1276 | 0.1805 |
| Marker83672  | Chr2 | 14559132 | 14559447 | 41  | 32  | 33  | 34  | 0.5616 | 0.4384 | 0.4925 | 0.5075 | -0.0691 | 0.0977 |
| Marker92214  | Chr2 | 14574039 | 14574381 | 21  | 34  | 21  | 20  | 0.3818 | 0.6182 | 0.5122 | 0.4878 | 0.1304  | 0.1844 |
| Marker68312  | Chr2 | 15049432 | 15049753 | 31  | 16  | 37  | 17  | 0.6596 | 0.3404 | 0.6852 | 0.3148 | 0.0256  | 0.0362 |
| Marker85179  | Chr2 | 15107162 | 15107436 | 47  | 59  | 29  | 27  | 0.4434 | 0.5566 | 0.5179 | 0.4821 | 0.0745  | 0.1054 |
| Marker83898  | Chr2 | 15110257 | 15110594 | 35  | 16  | 26  | 26  | 0.6863 | 0.3137 | 0.5    | 0.5    | -0.1863 | 0.2635 |
| Marker99877  | Chr2 | 15248650 | 15249009 | 30  | 36  | 27  | 37  | 0.4545 | 0.5455 | 0.4219 | 0.5781 | -0.0326 | 0.0461 |
| Marker95614  | Chr2 | 15267202 | 15267410 | 14  | 16  | 13  | 11  | 0.4667 | 0.5333 | 0.5417 | 0.4583 | 0.075   | 0.1061 |
| Marker101229 | Chr2 | 15446452 | 15446738 | 102 | 86  | 113 | 98  | 0.5426 | 0.4574 | 0.5355 | 0.4645 | -0.0071 | 0.01   |
| Marker65594  | Chr2 | 15460185 | 15460446 | 10  | 6   | 16  | 15  | 0.625  | 0.375  | 0.5161 | 0.4839 | -0.1089 | 0.154  |
| Marker89787  | Chr2 | 15476018 | 15476373 | 30  | 27  | 25  | 19  | 0.5263 | 0.4737 | 0.5682 | 0.4318 | 0.0419  | 0.0593 |
| Marker67647  | Chr2 | 15505094 | 15505415 | 17  | 13  | 22  | 20  | 0.5667 | 0.4333 | 0.5238 | 0.4762 | -0.0429 | 0.0607 |
| Marker80687  | Chr2 | 15544770 | 15545101 | 41  | 12  | 21  | 2   | 0.7736 | 0.2264 | 0.913  | 0.087  | 0.1394  | 0.1971 |
| Marker96654  | Chr2 | 15583639 | 15583911 | 41  | 43  | 40  | 25  | 0.4881 | 0.5119 | 0.6154 | 0.3846 | 0.1273  | 0.18   |



|              |      |          |          |     |     |     |     |        |        |        |        |         |        |
|--------------|------|----------|----------|-----|-----|-----|-----|--------|--------|--------|--------|---------|--------|
| Marker100086 | Chr2 | 15681848 | 15682164 | 54  | 19  | 22  | 32  | 0.7397 | 0.2603 | 0.4074 | 0.5926 | -0.3323 | 0.4699 |
| Marker83506  | Chr2 | 15684112 | 15684372 | 8   | 12  | 10  | 5   | 0.4    | 0.6    | 0.6667 | 0.3333 | 0.2667  | 0.3772 |
| Marker72728  | Chr2 | 15695327 | 15695658 | 15  | 9   | 16  | 19  | 0.625  | 0.375  | 0.4571 | 0.5429 | -0.1679 | 0.2374 |
| Marker95196  | Chr2 | 15695661 | 15695908 | 7   | 9   | 5   | 1   | 0.4375 | 0.5625 | 0.8333 | 0.1667 | 0.3958  | 0.5597 |
| Marker95162  | Chr2 | 15708341 | 15708614 | 40  | 24  | 40  | 18  | 0.625  | 0.375  | 0.6897 | 0.3103 | 0.0647  | 0.0915 |
| Marker90489  | Chr2 | 15725105 | 15725458 | 18  | 29  | 12  | 4   | 0.383  | 0.617  | 0.75   | 0.25   | 0.367   | 0.519  |
| Marker76218  | Chr2 | 15751159 | 15751518 | 22  | 32  | 19  | 14  | 0.4074 | 0.5926 | 0.5758 | 0.4242 | 0.1684  | 0.2382 |
| Marker75847  | Chr2 | 15761499 | 15761833 | 31  | 15  | 26  | 16  | 0.6739 | 0.3261 | 0.619  | 0.381  | -0.0549 | 0.0776 |
| Marker85560  | Chr2 | 16031583 | 16031881 | 38  | 73  | 30  | 50  | 0.3423 | 0.6577 | 0.375  | 0.625  | 0.0327  | 0.0462 |
| Marker75326  | Chr2 | 16053494 | 16053830 | 44  | 53  | 20  | 21  | 0.4536 | 0.5464 | 0.4878 | 0.5122 | 0.0342  | 0.0484 |
| Marker67621  | Chr2 | 16081852 | 16082079 | 11  | 5   | 5   | 6   | 0.6875 | 0.3125 | 0.4545 | 0.5455 | -0.233  | 0.3295 |
| Marker92581  | Chr2 | 16094697 | 16095027 | 19  | 6   | 9   | 9   | 0.76   | 0.24   | 0.5    | 0.5    | -0.26   | 0.3677 |
| Marker86826  | Chr2 | 16125524 | 16125830 | 20  | 19  | 10  | 11  | 0.5128 | 0.4872 | 0.4762 | 0.5238 | -0.0366 | 0.0518 |
| Marker80757  | Chr2 | 16129290 | 16129580 | 44  | 48  | 62  | 53  | 0.4783 | 0.5217 | 0.5391 | 0.4609 | 0.0608  | 0.086  |
| Marker72633  | Chr2 | 16129679 | 16129954 | 42  | 54  | 33  | 36  | 0.4375 | 0.5625 | 0.4783 | 0.5217 | 0.0408  | 0.0577 |
| Marker97615  | Chr2 | 16132151 | 16132440 | 84  | 78  | 84  | 91  | 0.5185 | 0.4815 | 0.48   | 0.52   | -0.0385 | 0.0544 |
| Marker74758  | Chr2 | 16211336 | 16211699 | 9   | 20  | 19  | 20  | 0.3103 | 0.6897 | 0.4872 | 0.5128 | 0.1769  | 0.2502 |
| Marker66429  | Chr2 | 16221188 | 16221480 | 87  | 78  | 69  | 90  | 0.5273 | 0.4727 | 0.434  | 0.566  | -0.0933 | 0.1319 |
| Marker98136  | Chr2 | 16228703 | 16229052 | 13  | 3   | 11  | 11  | 0.8125 | 0.1875 | 0.5    | 0.5    | -0.3125 | 0.4419 |
| Marker98632  | Chr2 | 16256144 | 16256424 | 23  | 49  | 19  | 49  | 0.3194 | 0.6806 | 0.2794 | 0.7206 | -0.04   | 0.0566 |
| Marker81788  | Chr2 | 16459194 | 16459537 | 32  | 11  | 22  | 10  | 0.7442 | 0.2558 | 0.6875 | 0.3125 | -0.0567 | 0.0802 |
| Marker71281  | Chr2 | 16471680 | 16471948 | 60  | 55  | 45  | 35  | 0.5217 | 0.4783 | 0.5625 | 0.4375 | 0.0408  | 0.0577 |
| Marker73303  | Chr2 | 16482926 | 16483239 | 64  | 49  | 29  | 28  | 0.5664 | 0.4336 | 0.5088 | 0.4912 | -0.0576 | 0.0815 |
| Marker71094  | Chr2 | 16488562 | 16488893 | 25  | 25  | 9   | 17  | 0.5    | 0.5    | 0.3462 | 0.6538 | -0.1538 | 0.2175 |
| Marker93132  | Chr2 | 16785803 | 16786066 | 17  | 16  | 9   | 20  | 0.5152 | 0.4848 | 0.3103 | 0.6897 | -0.2049 | 0.2898 |
| Marker71854  | Chr2 | 17033070 | 17033372 | 18  | 23  | 13  | 11  | 0.439  | 0.561  | 0.5417 | 0.4583 | 0.1027  | 0.1452 |
| Marker70331  | Chr2 | 17207625 | 17207975 | 15  | 7   | 7   | 11  | 0.6818 | 0.3182 | 0.3889 | 0.6111 | -0.2929 | 0.4142 |
| Marker73319  | Chr2 | 17209810 | 17210090 | 42  | 54  | 22  | 27  | 0.4375 | 0.5625 | 0.449  | 0.551  | 0.0115  | 0.0163 |
| Marker97307  | Chr2 | 17290348 | 17290607 | 16  | 21  | 13  | 7   | 0.4324 | 0.5676 | 0.65   | 0.35   | 0.2176  | 0.3077 |
| Marker101667 | Chr2 | 17290610 | 17290875 | 15  | 8   | 11  | 10  | 0.6522 | 0.3478 | 0.5238 | 0.4762 | -0.1284 | 0.1816 |
| Marker93932  | Chr2 | 17296374 | 17296687 | 52  | 67  | 19  | 34  | 0.437  | 0.563  | 0.3585 | 0.6415 | -0.0785 | 0.111  |
| Marker79768  | Chr2 | 17300347 | 17300642 | 31  | 56  | 29  | 41  | 0.3563 | 0.6437 | 0.4143 | 0.5857 | 0.058   | 0.082  |
| Marker78869  | Chr2 | 17329473 | 17329735 | 11  | 19  | 13  | 23  | 0.3667 | 0.6333 | 0.3611 | 0.6389 | -0.0056 | 0.0079 |
| Marker88948  | Chr2 | 17345312 | 17345564 | 9   | 11  | 13  | 8   | 0.45   | 0.55   | 0.619  | 0.381  | 0.169   | 0.239  |
| Marker100285 | Chr2 | 17347844 | 17348201 | 8   | 11  | 9   | 15  | 0.4211 | 0.5789 | 0.375  | 0.625  | -0.0461 | 0.0652 |
| Marker66987  | Chr2 | 17449372 | 17449573 | 12  | 10  | 11  | 6   | 0.5455 | 0.4545 | 0.6471 | 0.3529 | 0.1016  | 0.1437 |
| Marker89678  | Chr2 | 17458042 | 17458398 | 24  | 7   | 21  | 9   | 0.7742 | 0.2258 | 0.7    | 0.3    | -0.0742 | 0.1049 |
| Marker72658  | Chr2 | 17561530 | 17561809 | 66  | 63  | 43  | 51  | 0.5116 | 0.4884 | 0.4574 | 0.5426 | -0.0542 | 0.0767 |
| Marker87351  | Chr2 | 17598883 | 17599228 | 17  | 16  | 13  | 12  | 0.5152 | 0.4848 | 0.52   | 0.48   | 0.0048  | 0.0068 |
| Marker101600 | Chr2 | 17609946 | 17610203 | 23  | 14  | 19  | 7   | 0.6216 | 0.3784 | 0.7308 | 0.2692 | 0.1092  | 0.1544 |
| Marker97259  | Chr2 | 17621972 | 17622231 | 9   | 17  | 3   | 8   | 0.3462 | 0.6538 | 0.2727 | 0.7273 | -0.0735 | 0.1039 |
| Marker68684  | Chr2 | 17643343 | 17643711 | 15  | 9   | 10  | 9   | 0.625  | 0.375  | 0.5263 | 0.4737 | -0.0987 | 0.1396 |
| Marker95386  | Chr2 | 17644231 | 17644528 | 68  | 92  | 74  | 72  | 0.425  | 0.575  | 0.5068 | 0.4932 | 0.0818  | 0.1157 |
| Marker101026 | Chr2 | 17651071 | 17651379 | 162 | 115 | 146 | 179 | 0.5848 | 0.4152 | 0.4492 | 0.5508 | -0.1356 | 0.1918 |
| Marker81607  | Chr2 | 17653730 | 17654009 | 61  | 37  | 28  | 36  | 0.6224 | 0.3776 | 0.4375 | 0.5625 | -0.1849 | 0.2615 |
| Marker71259  | Chr2 | 17682910 | 17683264 | 8   | 7   | 5   | 14  | 0.5333 | 0.4667 | 0.2632 | 0.7368 | -0.2701 | 0.382  |
| Marker97215  | Chr2 | 17692169 | 17692415 | 11  | 10  | 7   | 14  | 0.5238 | 0.4762 | 0.3333 | 0.6667 | -0.1905 | 0.2694 |
| Marker67402  | Chr2 | 17692418 | 17692705 | 50  | 41  | 35  | 51  | 0.5495 | 0.4505 | 0.407  | 0.593  | -0.1425 | 0.2015 |
| Marker76750  | Chr2 | 17729072 | 17729337 | 36  | 55  | 40  | 44  | 0.3956 | 0.6044 | 0.4762 | 0.5238 | 0.0806  | 0.114  |
| Marker89821  | Chr2 | 18810380 | 18810695 | 21  | 22  | 26  | 21  | 0.4884 | 0.5116 | 0.5532 | 0.4468 | 0.0648  | 0.0916 |
| Marker100844 | Chr2 | 18939647 | 18939999 | 20  | 7   | 8   | 10  | 0.7407 | 0.2593 | 0.4444 | 0.5556 | -0.2963 | 0.419  |
| Marker75066  | Chr2 | 19065831 | 19066080 | 22  | 2   | 27  | 6   | 0.9167 | 0.0833 | 0.8182 | 0.1818 | -0.0985 | 0.1393 |
| Marker68985  | Chr2 | 19101177 | 19101447 | 18  | 17  | 7   | 5   | 0.5143 | 0.4857 | 0.5833 | 0.4167 | 0.069   | 0.0976 |
| Marker70570  | Chr2 | 19322702 | 19322995 | 44  | 46  | 18  | 19  | 0.4889 | 0.5111 | 0.4865 | 0.5135 | -0.0024 | 0.0034 |
| Marker86964  | Chr2 | 19417147 | 19417443 | 28  | 33  | 24  | 26  | 0.459  | 0.541  | 0.48   | 0.52   | 0.021   | 0.0297 |
| Marker69607  | Chr2 | 19978732 | 19979056 | 44  | 30  | 34  | 35  | 0.5946 | 0.4054 | 0.4928 | 0.5072 | -0.1018 | 0.144  |
| Marker95547  | Chr2 | 19980348 | 19980647 | 25  | 14  | 26  | 3   | 0.641  | 0.359  | 0.8966 | 0.1034 | 0.2556  | 0.3615 |
| Marker66845  | Chr2 | 20890731 | 20891042 | 35  | 21  | 24  | 30  | 0.625  | 0.375  | 0.4444 | 0.5556 | -0.1806 | 0.2554 |
| Marker91266  | Chr2 | 20891045 | 20891322 | 40  | 65  | 37  | 36  | 0.381  | 0.619  | 0.5068 | 0.4932 | 0.1258  | 0.1779 |
| Marker95813  | Chr2 | 20891397 | 20891674 | 54  | 61  | 27  | 55  | 0.4696 | 0.5304 | 0.3293 | 0.6707 | -0.1403 | 0.1984 |
| Marker82669  | Chr2 | 20891677 | 20891932 | 6   | 8   | 8   | 10  | 0.4286 | 0.5714 | 0.4444 | 0.5556 | 0.0158  | 0.0223 |
| Marker75915  | Chr2 | 20990830 | 20991120 | 37  | 39  | 29  | 42  | 0.4868 | 0.5132 | 0.4085 | 0.5915 | -0.0783 | 0.1107 |
| Marker70455  | Chr2 | 21241679 | 21241978 | 10  | 10  | 13  | 12  | 0.5    | 0.5    | 0.52   | 0.48   | 0.02    | 0.0283 |
| Marker74290  | Chr2 | 21806676 | 21806962 | 31  | 40  | 10  | 10  | 0.4366 | 0.5634 | 0.5    | 0.5    | 0.0634  | 0.0897 |
| Marker81224  | Chr2 | 21899617 | 21899865 | 11  | 1   | 5   | 7   | 0.9167 | 0.0833 | 0.4167 | 0.5833 | -0.5    | 0.7071 |
| Marker77748  | Chr2 | 21915485 | 21915799 | 32  | 45  | 34  | 20  | 0.4156 | 0.5844 | 0.6296 | 0.3704 | 0.214   | 0.3026 |
| Marker91388  | Chr2 | 21920895 | 21921134 | 4   | 2   | 2   | 9   | 0.6667 | 0.3333 | 0.1818 | 0.8182 | -0.4849 | 0.6858 |
| Marker92775  | Chr2 | 21922306 | 21922621 | 63  | 93  | 47  | 67  | 0.4038 | 0.5962 | 0.4123 | 0.5877 | 0.0085  | 0.012  |
| Marker89756  | Chr2 | 21926273 | 21926560 | 67  | 85  | 82  | 51  | 0.4408 | 0.5592 | 0.6165 | 0.3835 | 0.1757  | 0.2485 |
| Marker75203  | Chr2 | 22511329 | 22511611 | 52  | 17  | 25  | 23  | 0.7536 | 0.2464 | 0.5208 | 0.4792 | -0.2328 | 0.3292 |
| Marker43162  | Chr3 | 5893     | 6167     | 65  | 39  | 31  | 59  | 0.625  | 0.375  | 0.3444 | 0.6556 | -0.2806 | 0.3968 |
| Marker24573  | Chr3 | 11632    | 11984    | 32  | 16  | 14  | 21  | 0.6667 | 0.3333 | 0.4    | 0.6    | -0.2667 | 0.3772 |
| Marker57896  | Chr3 | 57006    | 57354    | 54  | 23  | 31  | 32  | 0.7013 | 0.2987 | 0.4921 | 0.5079 | -0.2092 | 0.2959 |
| Marker48426  | Chr3 | 80233    | 80582    | 19  | 6   | 12  | 17  | 0.76   | 0.24   | 0.4138 | 0.5862 | -0.3462 | 0.4896 |
| Marker1239   | Chr3 | 88631    | 88948    | 16  | 16  | 7   | 13  | 0.5    | 0.5    | 0.35   | 0.65   | -0.15   | 0.2121 |
| Marker64576  | Chr3 | 103676   | 104011   | 43  | 12  | 12  | 42  | 0.7818 | 0.2182 | 0.2222 | 0.7778 | -0.5596 | 0.7914 |
| Marker38223  | Chr3 | 112532   | 112761   | 10  | 9   | 2   | 4   | 0.5263 | 0.4737 | 0.3333 | 0.6667 | -0.193  | 0.2729 |
| Marker2367   | Chr3 | 120156   | 120484   | 44  | 28  | 24  | 34  | 0.6111 | 0.3889 | 0.4138 | 0.5862 | -0.1973 | 0.279  |
| Marker22802  | Chr3 | 120487   | 120811   | 29  | 22  | 21  | 35  | 0.5686 | 0.4314 | 0.625  | 0.375  | -0.1936 | 0.2738 |
| Marker38431  | Chr3 | 126557   | 126817   | 11  | 5   | 5   | 10  | 0.6875 | 0.3125 | 0.3333 | 0.6667 | -0.3542 | 0.5009 |
| Marker38549  | Chr3 | 162529   | 162887   | 29  | 6   | 29  | 6   | 0.8286 | 0.1714 | 0.8286 | 0.1714 | 0       | 0      |
| Marker53980  | Chr3 | 164669   | 164961   | 63  | 24  | 38  | 40  | 0.7241 | 0.2759 | 0.4872 | 0.5128 | -0.2369 | 0.335  |

|             |      |         |         |     |     |     |     |        |        |        |        |         |        |
|-------------|------|---------|---------|-----|-----|-----|-----|--------|--------|--------|--------|---------|--------|
| Marker46790 | Chr3 | 166653  | 166976  | 35  | 19  | 15  | 21  | 0.6481 | 0.3519 | 0.4167 | 0.5833 | -0.2314 | 0.3272 |
| Marker38953 | Chr3 | 172064  | 172400  | 44  | 16  | 8   | 27  | 0.7333 | 0.2667 | 0.2286 | 0.7714 | -0.5047 | 0.7138 |
| Marker43861 | Chr3 | 186073  | 186399  | 93  | 67  | 82  | 103 | 0.5813 | 0.4188 | 0.4432 | 0.5568 | -0.1381 | 0.1952 |
| Marker64740 | Chr3 | 186448  | 186774  | 48  | 24  | 21  | 54  | 0.6667 | 0.3333 | 0.28   | 0.72   | -0.3867 | 0.5469 |
| Marker4906  | Chr3 | 205237  | 205600  | 15  | 11  | 7   | 18  | 0.5769 | 0.4231 | 0.28   | 0.72   | -0.2969 | 0.4199 |
| Marker18700 | Chr3 | 219318  | 219609  | 138 | 42  | 86  | 115 | 0.7667 | 0.2333 | 0.4279 | 0.5721 | -0.3388 | 0.4791 |
| Marker59793 | Chr3 | 224231  | 224581  | 42  | 37  | 29  | 48  | 0.5316 | 0.4684 | 0.3766 | 0.6234 | -0.155  | 0.2192 |
| Marker30476 | Chr3 | 226909  | 227248  | 50  | 29  | 37  | 49  | 0.6329 | 0.3671 | 0.4302 | 0.5698 | -0.2027 | 0.2867 |
| Marker35887 | Chr3 | 243543  | 243757  | 15  | 16  | 11  | 6   | 0.4839 | 0.5161 | 0.6471 | 0.3529 | 0.1632  | 0.2308 |
| Marker34125 | Chr3 | 247492  | 247751  | 9   | 13  | 5   | 6   | 0.4091 | 0.5909 | 0.4545 | 0.5455 | 0.0454  | 0.0642 |
| Marker17776 | Chr3 | 254940  | 255281  | 23  | 4   | 13  | 1   | 0.8519 | 0.1481 | 0.9286 | 0.0714 | 0.0767  | 0.1085 |
| Marker30800 | Chr3 | 256735  | 257028  | 32  | 1   | 26  | 2   | 0.9697 | 0.0303 | 0.9286 | 0.0714 | -0.0411 | 0.0581 |
| Marker34859 | Chr3 | 264589  | 264847  | 22  | 7   | 7   | 19  | 0.7586 | 0.2414 | 0.2692 | 0.7308 | -0.4894 | 0.6921 |
| Marker12697 | Chr3 | 277926  | 278290  | 9   | 11  | 12  | 12  | 0.45   | 0.55   | 0.5    | 0.5    | 0.05    | 0.0707 |
| Marker36452 | Chr3 | 283839  | 284088  | 13  | 7   | 4   | 5   | 0.65   | 0.35   | 0.4444 | 0.5556 | -0.2056 | 0.2908 |
| Marker5332  | Chr3 | 291269  | 291587  | 26  | 23  | 23  | 17  | 0.5306 | 0.4694 | 0.575  | 0.425  | 0.0444  | 0.0628 |
| Marker14867 | Chr3 | 366718  | 366987  | 29  | 28  | 24  | 28  | 0.5088 | 0.4912 | 0.4615 | 0.5385 | -0.0473 | 0.0669 |
| Marker32978 | Chr3 | 402083  | 402377  | 145 | 80  | 94  | 109 | 0.6444 | 0.3556 | 0.4631 | 0.5369 | -0.1813 | 0.2564 |
| Marker6941  | Chr3 | 439176  | 439514  | 43  | 41  | 21  | 40  | 0.5119 | 0.4881 | 0.3443 | 0.6557 | -0.1676 | 0.237  |
| Marker50928 | Chr3 | 451980  | 452277  | 166 | 116 | 145 | 175 | 0.5887 | 0.4113 | 0.4531 | 0.5469 | -0.1356 | 0.1918 |
| Marker53563 | Chr3 | 459278  | 459613  | 36  | 22  | 5   | 23  | 0.6207 | 0.3793 | 0.1786 | 0.8214 | -0.4421 | 0.6252 |
| Marker5536  | Chr3 | 472879  | 473207  | 41  | 15  | 11  | 15  | 0.7321 | 0.2679 | 0.4231 | 0.5769 | -0.309  | 0.437  |
| Marker20580 | Chr3 | 491362  | 491667  | 52  | 29  | 30  | 16  | 0.642  | 0.358  | 0.6522 | 0.3478 | 0.0102  | 0.0144 |
| Marker62648 | Chr3 | 512710  | 513022  | 119 | 102 | 83  | 105 | 0.5385 | 0.4615 | 0.4415 | 0.5585 | -0.097  | 0.1372 |
| Marker7305  | Chr3 | 518955  | 519233  | 55  | 44  | 39  | 64  | 0.5556 | 0.4444 | 0.3786 | 0.6214 | -0.177  | 0.2503 |
| Marker10184 | Chr3 | 531468  | 531811  | 32  | 20  | 29  | 21  | 0.6154 | 0.3846 | 0.58   | 0.42   | -0.0354 | 0.0501 |
| Marker16209 | Chr3 | 543739  | 544013  | 27  | 8   | 2   | 16  | 0.7714 | 0.2286 | 0.1111 | 0.8889 | -0.6603 | 0.9338 |
| Marker15130 | Chr3 | 544510  | 544834  | 45  | 31  | 16  | 36  | 0.5921 | 0.4079 | 0.3077 | 0.6923 | -0.2844 | 0.4022 |
| Marker50800 | Chr3 | 568320  | 568569  | 22  | 11  | 9   | 17  | 0.6667 | 0.3333 | 0.3462 | 0.6538 | -0.3205 | 0.4533 |
| Marker3663  | Chr3 | 582252  | 582541  | 142 | 73  | 103 | 91  | 0.6605 | 0.3395 | 0.5309 | 0.4691 | -0.1296 | 0.1833 |
| Marker19443 | Chr3 | 585708  | 585980  | 39  | 27  | 34  | 40  | 0.5909 | 0.4091 | 0.4595 | 0.5405 | -0.1314 | 0.1858 |
| Marker34269 | Chr3 | 894850  | 895131  | 46  | 30  | 21  | 47  | 0.6053 | 0.3947 | 0.3088 | 0.6912 | -0.2965 | 0.4193 |
| Marker50877 | Chr3 | 897399  | 897719  | 25  | 18  | 10  | 7   | 0.5814 | 0.4186 | 0.5882 | 0.4118 | 0.0068  | 0.0096 |
| Marker15640 | Chr3 | 908741  | 909088  | 28  | 19  | 18  | 21  | 0.5957 | 0.4043 | 0.4615 | 0.5385 | -0.1342 | 0.1898 |
| Marker23551 | Chr3 | 979766  | 979987  | 19  | 16  | 15  | 23  | 0.5429 | 0.4571 | 0.3947 | 0.6053 | -0.1482 | 0.2096 |
| Marker62341 | Chr3 | 981427  | 981711  | 7   | 12  | 5   | 17  | 0.3684 | 0.6316 | 0.2273 | 0.7727 | -0.1411 | 0.1995 |
| Marker12477 | Chr3 | 1037683 | 1037943 | 39  | 20  | 19  | 28  | 0.661  | 0.339  | 0.4043 | 0.5957 | -0.2567 | 0.363  |
| Marker54618 | Chr3 | 1093436 | 1093744 | 18  | 8   | 11  | 19  | 0.6923 | 0.3077 | 0.3667 | 0.6333 | -0.3256 | 0.4605 |
| Marker16047 | Chr3 | 1094521 | 1094846 | 65  | 30  | 34  | 41  | 0.6842 | 0.3158 | 0.4533 | 0.5467 | -0.2309 | 0.3265 |
| Marker2917  | Chr3 | 1095239 | 1095551 | 17  | 8   | 5   | 11  | 0.68   | 0.32   | 0.3125 | 0.6875 | -0.3675 | 0.5197 |
| Marker26558 | Chr3 | 1128448 | 1128726 | 51  | 31  | 43  | 50  | 0.622  | 0.378  | 0.4624 | 0.5376 | -0.1596 | 0.2257 |
| Marker15673 | Chr3 | 1459855 | 1460185 | 9   | 8   | 6   | 10  | 0.5294 | 0.4706 | 0.375  | 0.625  | -0.1544 | 0.2184 |
| Marker14419 | Chr3 | 1470289 | 1470548 | 9   | 12  | 9   | 24  | 0.4286 | 0.5714 | 0.2727 | 0.7273 | -0.1559 | 0.2205 |
| Marker37798 | Chr3 | 1511978 | 1512315 | 63  | 52  | 36  | 62  | 0.5478 | 0.4522 | 0.3673 | 0.6327 | -0.1805 | 0.2553 |
| Marker53476 | Chr3 | 1619627 | 1619968 | 17  | 8   | 11  | 27  | 0.68   | 0.32   | 0.2895 | 0.7105 | -0.3905 | 0.5523 |
| Marker59505 | Chr3 | 1780589 | 1780837 | 16  | 7   | 7   | 9   | 0.6957 | 0.3043 | 0.4375 | 0.5625 | -0.2582 | 0.3651 |
| Marker19422 | Chr3 | 1788085 | 1788422 | 4   | 7   | 3   | 5   | 0.3636 | 0.6364 | 0.375  | 0.625  | 0.0114  | 0.0161 |
| Marker41139 | Chr3 | 1795376 | 1795708 | 19  | 9   | 14  | 22  | 0.6786 | 0.3214 | 0.3889 | 0.6111 | -0.2897 | 0.4097 |
| Marker55192 | Chr3 | 1797927 | 1798229 | 22  | 20  | 13  | 15  | 0.5238 | 0.4762 | 0.4643 | 0.5357 | -0.0595 | 0.0841 |
| Marker56710 | Chr3 | 1837204 | 1837502 | 67  | 36  | 14  | 28  | 0.6505 | 0.3495 | 0.3333 | 0.6667 | -0.3172 | 0.4486 |
| Marker50661 | Chr3 | 1861303 | 1861631 | 37  | 22  | 17  | 22  | 0.6271 | 0.3729 | 0.4359 | 0.5641 | -0.1912 | 0.2704 |
| Marker55090 | Chr3 | 1864626 | 1864966 | 51  | 23  | 42  | 41  | 0.6892 | 0.3108 | 0.506  | 0.494  | -0.1832 | 0.2591 |
| Marker56500 | Chr3 | 1873965 | 1874261 | 87  | 59  | 57  | 73  | 0.5959 | 0.4041 | 0.4385 | 0.5615 | -0.1574 | 0.2226 |
| Marker45983 | Chr3 | 1945499 | 1945789 | 102 | 51  | 51  | 86  | 0.6667 | 0.3333 | 0.3723 | 0.6277 | -0.2944 | 0.4163 |
| Marker63941 | Chr3 | 2113201 | 2113493 | 60  | 1   | 31  | 1   | 0.9836 | 0.0164 | 0.9688 | 0.0312 | -0.0148 | 0.0209 |
| Marker45674 | Chr3 | 2123710 | 2124014 | 31  | 22  | 21  | 24  | 0.5849 | 0.4151 | 0.4667 | 0.5333 | -0.1182 | 0.1672 |
| Marker33171 | Chr3 | 2127576 | 2127908 | 57  | 32  | 26  | 30  | 0.6404 | 0.3596 | 0.4643 | 0.5357 | -0.1761 | 0.249  |
| Marker5347  | Chr3 | 2129207 | 2129521 | 41  | 32  | 37  | 51  | 0.5616 | 0.4384 | 0.4205 | 0.5795 | -0.1411 | 0.1995 |
| Marker10485 | Chr3 | 2130754 | 2131017 | 12  | 13  | 6   | 22  | 0.48   | 0.52   | 0.2143 | 0.7857 | -0.2657 | 0.3758 |
| Marker28960 | Chr3 | 2236556 | 2236807 | 6   | 6   | 2   | 9   | 0.5    | 0.5    | 0.1818 | 0.8182 | -0.3182 | 0.45   |
| Marker56179 | Chr3 | 2237438 | 2237752 | 9   | 7   | 2   | 7   | 0.5625 | 0.4375 | 0.2222 | 0.7778 | -0.3403 | 0.4813 |
| Marker26080 | Chr3 | 2237755 | 2238013 | 8   | 6   | 8   | 7   | 0.5714 | 0.4286 | 0.5333 | 0.4667 | -0.0381 | 0.0539 |
| Marker30761 | Chr3 | 2239747 | 2239992 | 20  | 13  | 16  | 19  | 0.6061 | 0.3939 | 0.4571 | 0.5429 | -0.149  | 0.2107 |
| Marker59551 | Chr3 | 2253194 | 2253467 | 57  | 41  | 36  | 43  | 0.5816 | 0.4184 | 0.4557 | 0.5443 | -0.1259 | 0.178  |
| Marker41177 | Chr3 | 2262857 | 2263201 | 18  | 21  | 15  | 29  | 0.4615 | 0.5385 | 0.3409 | 0.6591 | -0.1206 | 0.1706 |
| Marker15891 | Chr3 | 2275742 | 2276016 | 32  | 16  | 19  | 29  | 0.6667 | 0.3333 | 0.3958 | 0.6042 | -0.2709 | 0.3831 |
| Marker57594 | Chr3 | 2321039 | 2321256 | 7   | 8   | 13  | 10  | 0.4667 | 0.5333 | 0.5652 | 0.4348 | 0.0985  | 0.1393 |
| Marker2300  | Chr3 | 2327821 | 2328080 | 12  | 9   | 4   | 5   | 0.5714 | 0.4286 | 0.4444 | 0.5556 | -0.127  | 0.1796 |
| Marker16425 | Chr3 | 2353353 | 2353614 | 19  | 14  | 22  | 16  | 0.5758 | 0.4242 | 0.3579 | 0.4211 | 0.0031  | 0.0044 |
| Marker41531 | Chr3 | 2358718 | 2359002 | 55  | 31  | 26  | 38  | 0.6395 | 0.3605 | 0.4062 | 0.5938 | -0.2333 | 0.3299 |
| Marker47461 | Chr3 | 2364289 | 2364584 | 35  | 15  | 20  | 30  | 0.7    | 0.3    | 0.4    | 0.6    | -0.3    | 0.4243 |
| Marker29699 | Chr3 | 2394113 | 2394388 | 38  | 37  | 26  | 48  | 0.5067 | 0.4933 | 0.3514 | 0.6486 | -0.1553 | 0.2196 |
| Marker62404 | Chr3 | 2399504 | 2399783 | 38  | 46  | 9   | 35  | 0.4524 | 0.5476 | 0.2045 | 0.7955 | -0.2479 | 0.3506 |
| Marker59391 | Chr3 | 2406255 | 2406526 | 14  | 14  | 13  | 32  | 0.5    | 0.5    | 0.2889 | 0.7111 | -0.2111 | 0.2985 |
| Marker58879 | Chr3 | 2437503 | 2437766 | 30  | 32  | 22  | 29  | 0.4839 | 0.5161 | 0.4314 | 0.5686 | -0.0525 | 0.0742 |
| Marker2771  | Chr3 | 2440552 | 2440875 | 52  | 18  | 24  | 10  | 0.7429 | 0.2571 | 0.7059 | 0.2941 | -0.037  | 0.0523 |
| Marker2048  | Chr3 | 2476542 | 2476861 | 51  | 36  | 46  | 22  | 0.5862 | 0.4138 | 0.6765 | 0.3235 | 0.0903  | 0.1277 |
| Marker35612 | Chr3 | 2607681 | 2608014 | 26  | 12  | 9   | 15  | 0.6842 | 0.3158 | 0.375  | 0.625  | -0.3092 | 0.4373 |
| Marker36559 | Chr3 | 2608017 | 2608361 | 15  | 10  | 8   | 19  | 0.6    | 0.4    | 0.2963 | 0.7037 | -0.3037 | 0.4295 |
| Marker51231 | Chr3 | 2619121 | 2619381 | 31  | 15  | 29  | 28  | 0.6739 | 0.3261 | 0.5088 | 0.4912 | -0.1651 | 0.2335 |
| Marker10712 | Chr3 | 2619784 | 2620138 | 23  | 16  | 12  | 18  | 0.5897 | 0.4103 | 0.4    | 0.6    | -0.1897 | 0.2683 |
| Marker42886 | Chr3 | 2780714 | 2780966 | 11  | 9   | 5   | 15  | 0.55   | 0.45   | 0.25   | 0.75   | -0.3    | 0.4243 |

|             |      |         |         |     |    |    |     |        |        |        |        |         |        |
|-------------|------|---------|---------|-----|----|----|-----|--------|--------|--------|--------|---------|--------|
| Marker19805 | Chr3 | 2925173 | 2925438 | 19  | 12 | 4  | 12  | 0.6129 | 0.3871 | 0.25   | 0.75   | -0.3629 | 0.5132 |
| Marker61515 | Chr3 | 2937890 | 2938193 | 37  | 41 | 17 | 33  | 0.4744 | 0.5256 | 0.34   | 0.66   | -0.1344 | 0.1901 |
| Marker54678 | Chr3 | 2938370 | 2938721 | 27  | 13 | 12 | 17  | 0.675  | 0.325  | 0.4138 | 0.5862 | -0.2612 | 0.3694 |
| Marker7882  | Chr3 | 2961092 | 2961442 | 24  | 14 | 12 | 25  | 0.6316 | 0.3684 | 0.3243 | 0.6757 | -0.3073 | 0.4346 |
| Marker37818 | Chr3 | 2963706 | 2964000 | 53  | 33 | 18 | 41  | 0.6163 | 0.3837 | 0.3051 | 0.6949 | -0.3112 | 0.4401 |
| Marker2704  | Chr3 | 2974547 | 2974851 | 69  | 36 | 29 | 46  | 0.6571 | 0.3429 | 0.3867 | 0.6133 | -0.2704 | 0.3824 |
| Marker21950 | Chr3 | 2996073 | 2996386 | 37  | 21 | 31 | 20  | 0.6379 | 0.3621 | 0.6078 | 0.3922 | -0.0301 | 0.0426 |
| Marker13264 | Chr3 | 3003492 | 3003761 | 19  | 18 | 9  | 42  | 0.5135 | 0.4865 | 0.1765 | 0.8235 | -0.337  | 0.4766 |
| Marker8477  | Chr3 | 3012509 | 3012800 | 35  | 22 | 12 | 44  | 0.614  | 0.386  | 0.2143 | 0.7857 | -0.3997 | 0.5653 |
| Marker19987 | Chr3 | 3124460 | 3124730 | 57  | 56 | 30 | 31  | 0.5044 | 0.4956 | 0.4918 | 0.5082 | -0.0126 | 0.0178 |
| Marker44420 | Chr3 | 3150693 | 3150955 | 69  | 23 | 22 | 27  | 0.75   | 0.25   | 0.449  | 0.551  | -0.301  | 0.4257 |
| Marker62423 | Chr3 | 3195257 | 3195598 | 14  | 12 | 5  | 6   | 0.5385 | 0.4615 | 0.4545 | 0.5455 | -0.084  | 0.1188 |
| Marker11394 | Chr3 | 3197354 | 3197611 | 20  | 11 | 7  | 15  | 0.6452 | 0.3548 | 0.3182 | 0.6818 | -0.327  | 0.4624 |
| Marker60794 | Chr3 | 3198038 | 3198352 | 51  | 52 | 34 | 73  | 0.4951 | 0.5049 | 0.3178 | 0.6822 | -0.1773 | 0.2507 |
| Marker17105 | Chr3 | 3203022 | 3203358 | 59  | 46 | 22 | 41  | 0.5619 | 0.4381 | 0.3492 | 0.6508 | -0.2127 | 0.3008 |
| Marker27787 | Chr3 | 3211131 | 3211389 | 21  | 51 | 7  | 67  | 0.2917 | 0.7083 | 0.0946 | 0.9054 | -0.1971 | 0.2787 |
| Marker11773 | Chr3 | 3215995 | 3216333 | 39  | 20 | 20 | 36  | 0.661  | 0.339  | 0.3571 | 0.6429 | -0.3039 | 0.4298 |
| Marker39629 | Chr3 | 3220127 | 3220468 | 39  | 20 | 19 | 32  | 0.661  | 0.339  | 0.3725 | 0.6275 | -0.2885 | 0.408  |
| Marker32002 | Chr3 | 3247242 | 3247557 | 19  | 21 | 7  | 11  | 0.475  | 0.525  | 0.3889 | 0.6111 | -0.0861 | 0.1218 |
| Marker42229 | Chr3 | 3328298 | 3328561 | 25  | 12 | 17 | 5   | 0.6757 | 0.3243 | 0.7727 | 0.2273 | 0.097   | 0.1372 |
| Marker45363 | Chr3 | 3370138 | 3370481 | 19  | 19 | 7  | 11  | 0.5    | 0.5    | 0.3889 | 0.6111 | -0.1111 | 0.1571 |
| Marker28624 | Chr3 | 3501665 | 3501952 | 49  | 46 | 13 | 37  | 0.5158 | 0.4842 | 0.26   | 0.74   | -0.2558 | 0.3618 |
| Marker8748  | Chr3 | 3503476 | 3503808 | 17  | 14 | 6  | 23  | 0.5484 | 0.4516 | 0.2069 | 0.7931 | -0.3415 | 0.483  |
| Marker1890  | Chr3 | 3504672 | 3504988 | 49  | 42 | 19 | 49  | 0.5385 | 0.4615 | 0.2794 | 0.7206 | -0.2591 | 0.3664 |
| Marker43212 | Chr3 | 3504991 | 3505349 | 21  | 8  | 1  | 14  | 0.7241 | 0.2759 | 0.0667 | 0.9333 | -0.6574 | 0.9297 |
| Marker25430 | Chr3 | 3505352 | 3505637 | 33  | 32 | 19 | 37  | 0.5077 | 0.4923 | 0.3393 | 0.6607 | -0.1684 | 0.2382 |
| Marker36704 | Chr3 | 3507701 | 3508020 | 47  | 25 | 15 | 30  | 0.6528 | 0.3472 | 0.3333 | 0.6667 | -0.3195 | 0.4518 |
| Marker14299 | Chr3 | 3513086 | 3513410 | 53  | 27 | 18 | 38  | 0.6625 | 0.3375 | 0.3214 | 0.6786 | -0.3411 | 0.4824 |
| Marker34312 | Chr3 | 3533546 | 3533830 | 70  | 21 | 26 | 61  | 0.7692 | 0.2308 | 0.2989 | 0.7011 | -0.4703 | 0.6651 |
| Marker21883 | Chr3 | 3576395 | 3576726 | 25  | 16 | 19 | 27  | 0.6098 | 0.3902 | 0.413  | 0.587  | -0.1968 | 0.2783 |
| Marker62229 | Chr3 | 3579268 | 3579542 | 57  | 32 | 29 | 64  | 0.6404 | 0.3596 | 0.3118 | 0.6882 | -0.3286 | 0.4647 |
| Marker31858 | Chr3 | 3581586 | 3581872 | 76  | 50 | 31 | 66  | 0.6032 | 0.3968 | 0.3196 | 0.6804 | -0.2836 | 0.4011 |
| Marker43250 | Chr3 | 3726405 | 3726653 | 24  | 19 | 5  | 18  | 0.5581 | 0.4419 | 0.2174 | 0.7826 | -0.3407 | 0.4818 |
| Marker1811  | Chr3 | 3746911 | 3747195 | 20  | 14 | 15 | 21  | 0.5882 | 0.4118 | 0.4167 | 0.5833 | -0.1715 | 0.2425 |
| Marker60073 | Chr3 | 3824525 | 3824789 | 25  | 17 | 28 | 33  | 0.5952 | 0.4048 | 0.459  | 0.541  | -0.1362 | 0.1926 |
| Marker48495 | Chr3 | 3841754 | 3842014 | 25  | 20 | 12 | 30  | 0.5556 | 0.4444 | 0.2857 | 0.7143 | -0.2699 | 0.3817 |
| Marker64121 | Chr3 | 3844203 | 3844533 | 36  | 3  | 20 | 5   | 0.9231 | 0.0769 | 0.8    | 0.2    | -0.1231 | 0.1741 |
| Marker28904 | Chr3 | 3844536 | 3844840 | 59  | 38 | 26 | 37  | 0.6082 | 0.3918 | 0.4127 | 0.5873 | -0.1955 | 0.2765 |
| Marker63014 | Chr3 | 3845178 | 3845499 | 75  | 36 | 36 | 45  | 0.6757 | 0.3243 | 0.4444 | 0.5556 | -0.2313 | 0.3271 |
| Marker34661 | Chr3 | 3888122 | 3888380 | 26  | 13 | 11 | 17  | 0.6667 | 0.3333 | 0.3929 | 0.6071 | -0.2738 | 0.3872 |
| Marker1921  | Chr3 | 3900092 | 3900396 | 12  | 10 | 7  | 17  | 0.5455 | 0.4545 | 0.2917 | 0.7083 | -0.2538 | 0.3589 |
| Marker32778 | Chr3 | 3904566 | 3904780 | 8   | 7  | 6  | 10  | 0.5333 | 0.4667 | 0.375  | 0.625  | -0.1583 | 0.2239 |
| Marker7613  | Chr3 | 3906772 | 3907032 | 27  | 17 | 14 | 18  | 0.6136 | 0.3864 | 0.4375 | 0.5625 | -0.1761 | 0.249  |
| Marker23072 | Chr3 | 3931702 | 3932011 | 19  | 12 | 8  | 12  | 0.6129 | 0.3871 | 0.4    | 0.6    | -0.2129 | 0.3011 |
| Marker20106 | Chr3 | 3963421 | 3963692 | 46  | 20 | 15 | 15  | 0.697  | 0.303  | 0.5    | 0.5    | -0.197  | 0.2786 |
| Marker41535 | Chr3 | 3994030 | 3994348 | 26  | 28 | 13 | 27  | 0.4815 | 0.5185 | 0.325  | 0.675  | -0.1565 | 0.2213 |
| Marker32624 | Chr3 | 4052065 | 4052399 | 13  | 12 | 10 | 16  | 0.52   | 0.48   | 0.3846 | 0.6154 | -0.1354 | 0.1915 |
| Marker48858 | Chr3 | 4065748 | 4066063 | 19  | 13 | 6  | 28  | 0.5938 | 0.4062 | 0.1765 | 0.8235 | -0.4173 | 0.5902 |
| Marker6704  | Chr3 | 4094797 | 4095080 | 36  | 24 | 5  | 24  | 0.6    | 0.4    | 0.1724 | 0.8276 | -0.4276 | 0.6047 |
| Marker24031 | Chr3 | 4097525 | 4097814 | 103 | 62 | 63 | 105 | 0.6242 | 0.3758 | 0.375  | 0.625  | -0.2492 | 0.3524 |
| Marker36893 | Chr3 | 4100613 | 4100905 | 78  | 26 | 20 | 53  | 0.75   | 0.25   | 0.274  | 0.726  | -0.476  | 0.6732 |
| Marker46329 | Chr3 | 4128170 | 4128483 | 36  | 40 | 15 | 59  | 0.4737 | 0.5263 | 0.2027 | 0.7973 | -0.271  | 0.3833 |
| Marker6787  | Chr3 | 4128486 | 4128834 | 28  | 27 | 21 | 31  | 0.5091 | 0.4909 | 0.4038 | 0.5962 | -0.1053 | 0.1489 |
| Marker13517 | Chr3 | 4136589 | 4136921 | 38  | 15 | 18 | 33  | 0.717  | 0.283  | 0.3529 | 0.6471 | -0.3641 | 0.5149 |
| Marker28516 | Chr3 | 4146536 | 4146847 | 43  | 14 | 12 | 34  | 0.7544 | 0.2456 | 0.2609 | 0.7391 | -0.4935 | 0.6979 |
| Marker33701 | Chr3 | 4150942 | 4151275 | 39  | 25 | 18 | 31  | 0.6094 | 0.3906 | 0.3673 | 0.6327 | -0.2421 | 0.3424 |
| Marker52913 | Chr3 | 4178085 | 4178359 | 58  | 24 | 23 | 39  | 0.7073 | 0.2927 | 0.371  | 0.629  | -0.3363 | 0.4756 |
| Marker4736  | Chr3 | 4182576 | 4182894 | 48  | 23 | 20 | 22  | 0.6761 | 0.3239 | 0.4762 | 0.5238 | -0.1999 | 0.2827 |
| Marker26434 | Chr3 | 4189540 | 4189790 | 9   | 9  | 4  | 3   | 0.5    | 0.5    | 0.5714 | 0.4286 | 0.0714  | 0.101  |
| Marker55050 | Chr3 | 4189969 | 4190291 | 123 | 66 | 60 | 141 | 0.6508 | 0.3492 | 0.2985 | 0.7015 | -0.3523 | 0.4982 |
| Marker37284 | Chr3 | 4190634 | 4190932 | 70  | 53 | 21 | 55  | 0.5691 | 0.4309 | 0.2763 | 0.7237 | -0.2928 | 0.4141 |
| Marker37351 | Chr3 | 4192805 | 4193074 | 33  | 21 | 7  | 20  | 0.6111 | 0.3889 | 0.2593 | 0.7407 | -0.3518 | 0.4975 |
| Marker35098 | Chr3 | 4198109 | 4198459 | 17  | 11 | 7  | 14  | 0.6071 | 0.3929 | 0.3333 | 0.6667 | -0.2738 | 0.3872 |
| Marker10135 | Chr3 | 4200202 | 4200551 | 36  | 37 | 36 | 15  | 0.4932 | 0.5068 | 0.7059 | 0.2941 | 0.2127  | 0.3008 |
| Marker41162 | Chr3 | 4201985 | 4202224 | 15  | 12 | 10 | 10  | 0.5556 | 0.4444 | 0.5    | 0.5    | -0.0556 | 0.0786 |
| Marker20060 | Chr3 | 4202642 | 4202939 | 80  | 76 | 33 | 90  | 0.5128 | 0.4872 | 0.2683 | 0.7317 | -0.2445 | 0.3458 |
| Marker59303 | Chr3 | 4206241 | 4206572 | 78  | 17 | 29 | 60  | 0.8211 | 0.1789 | 0.3258 | 0.6742 | -0.4953 | 0.7005 |
| Marker51190 | Chr3 | 4208724 | 4209045 | 53  | 33 | 12 | 42  | 0.6163 | 0.3837 | 0.2222 | 0.7778 | -0.3941 | 0.5573 |
| Marker36690 | Chr3 | 4270156 | 4270507 | 20  | 13 | 11 | 16  | 0.6061 | 0.3939 | 0.4074 | 0.5926 | -0.1987 | 0.281  |
| Marker47176 | Chr3 | 4701808 | 4702077 | 66  | 47 | 36 | 63  | 0.5841 | 0.4159 | 0.3636 | 0.6364 | -0.2205 | 0.3118 |
| Marker36729 | Chr3 | 4705341 | 4705588 | 10  | 4  | 2  | 3   | 0.7143 | 0.2857 | 0.4    | 0.6    | -0.3143 | 0.4445 |
| Marker43520 | Chr3 | 4732120 | 4732327 | 11  | 9  | 4  | 5   | 0.55   | 0.45   | 0.4444 | 0.5556 | -0.1056 | 0.1493 |
| Marker43952 | Chr3 | 4739673 | 4739972 | 41  | 23 | 16 | 43  | 0.6406 | 0.3594 | 0.2712 | 0.7288 | -0.3694 | 0.5224 |
| Marker24858 | Chr3 | 4748518 | 4748830 | 60  | 35 | 36 | 34  | 0.6316 | 0.3684 | 0.5143 | 0.4857 | -0.1173 | 0.1659 |
| Marker56046 | Chr3 | 4764034 | 4764315 | 20  | 16 | 11 | 20  | 0.5556 | 0.4444 | 0.3548 | 0.6452 | -0.2008 | 0.284  |
| Marker62682 | Chr3 | 4768746 | 4769003 | 8   | 8  | 3  | 6   | 0.5    | 0.5    | 0.3333 | 0.6667 | -0.1667 | 0.2357 |
| Marker52084 | Chr3 | 4878279 | 4878605 | 49  | 22 | 24 | 16  | 0.6901 | 0.3099 | 0.6    | 0.4    | -0.0901 | 0.1274 |
| Marker14296 | Chr3 | 4878608 | 4878867 | 17  | 7  | 6  | 9   | 0.7083 | 0.2917 | 0.4    | 0.6    | -0.3083 | 0.436  |
| Marker63888 | Chr3 | 4887454 | 4887733 | 51  | 32 | 23 | 25  | 0.6145 | 0.3855 | 0.4792 | 0.5208 | -0.1353 | 0.1913 |
| Marker3395  | Chr3 | 4898869 | 4899206 | 27  | 11 | 10 | 23  | 0.7105 | 0.2895 | 0.303  | 0.697  | -0.4075 | 0.5763 |
| Marker45036 | Chr3 | 4902751 | 4903089 | 27  | 16 | 15 | 24  | 0.6279 | 0.3721 | 0.3846 | 0.6154 | -0.2433 | 0.3441 |
| Marker48345 | Chr3 | 4915640 | 4915988 | 30  | 15 | 7  | 20  | 0.6667 | 0.3333 | 0.2593 | 0.7407 | -0.4074 | 0.5762 |

|              |      |         |         |     |     |    |     |        |        |        |        |         |        |
|--------------|------|---------|---------|-----|-----|----|-----|--------|--------|--------|--------|---------|--------|
| Marker36630  | Chr3 | 4924445 | 4924730 | 82  | 52  | 53 | 80  | 0.6119 | 0.3881 | 0.3985 | 0.6015 | -0.2134 | 0.3018 |
| Marker26506  | Chr3 | 5023397 | 5023693 | 101 | 52  | 46 | 87  | 0.6601 | 0.3399 | 0.3459 | 0.6541 | -0.3142 | 0.4443 |
| Markers56142 | Chr3 | 5031171 | 5031473 | 23  | 14  | 7  | 27  | 0.6216 | 0.3784 | 0.2059 | 0.7941 | -0.4157 | 0.5879 |
| Marker12103  | Chr3 | 5179686 | 5179969 | 60  | 15  | 13 | 28  | 0.8    | 0.2    | 0.3171 | 0.6829 | -0.4829 | 0.6829 |
| Marker6930   | Chr3 | 5182624 | 5182986 | 7   | 12  | 3  | 10  | 0.3684 | 0.6316 | 0.2308 | 0.7692 | -0.1376 | 0.1946 |
| Marker1980   | Chr3 | 5257389 | 5257735 | 14  | 9   | 8  | 26  | 0.6087 | 0.3913 | 0.2353 | 0.7647 | -0.3734 | 0.5281 |
| Marker43620  | Chr3 | 5258066 | 5258394 | 39  | 30  | 12 | 30  | 0.5652 | 0.4348 | 0.2857 | 0.7143 | -0.2795 | 0.3953 |
| Marker10882  | Chr3 | 5297746 | 5298048 | 32  | 31  | 19 | 39  | 0.5079 | 0.4921 | 0.3276 | 0.6724 | -0.1803 | 0.255  |
| Marker51891  | Chr3 | 5302782 | 5303077 | 81  | 48  | 37 | 45  | 0.6279 | 0.3721 | 0.4512 | 0.5488 | -0.1767 | 0.2499 |
| Marker18409  | Chr3 | 5305433 | 5305695 | 49  | 16  | 29 | 47  | 0.7538 | 0.2462 | 0.3816 | 0.6184 | -0.3722 | 0.5264 |
| Marker36376  | Chr3 | 5323688 | 5323958 | 13  | 7   | 6  | 12  | 0.65   | 0.35   | 0.3333 | 0.6667 | -0.3167 | 0.4479 |
| Marker39080  | Chr3 | 5345529 | 5345803 | 101 | 22  | 47 | 43  | 0.8211 | 0.1789 | 0.5222 | 0.4778 | -0.2989 | 0.4227 |
| Marker23887  | Chr3 | 5567096 | 5567446 | 10  | 11  | 4  | 8   | 0.4762 | 0.5238 | 0.3333 | 0.6667 | -0.1429 | 0.2021 |
| Marker38173  | Chr3 | 5578989 | 5579332 | 48  | 14  | 32 | 21  | 0.7742 | 0.2258 | 0.6038 | 0.3962 | -0.1704 | 0.241  |
| Markers5668  | Chr3 | 5597377 | 5597664 | 73  | 15  | 80 | 40  | 0.8295 | 0.1705 | 0.6667 | 0.3333 | -0.1628 | 0.2302 |
| Marker11396  | Chr3 | 5608369 | 5608717 | 48  | 20  | 21 | 33  | 0.7059 | 0.2941 | 0.3889 | 0.6111 | -0.317  | 0.4483 |
| Marker46716  | Chr3 | 5609514 | 5609775 | 43  | 3   | 37 | 31  | 0.9348 | 0.0652 | 0.5441 | 0.4559 | -0.3907 | 0.5525 |
| Marker4548   | Chr3 | 5615898 | 5616155 | 26  | 12  | 9  | 16  | 0.6842 | 0.3158 | 0.36   | 0.64   | -0.3242 | 0.4585 |
| Marker48377  | Chr3 | 5617818 | 5618089 | 72  | 8   | 36 | 24  | 0.9    | 0.1    | 0.6    | 0.4    | -0.3    | 0.4243 |
| Marker44401  | Chr3 | 5686763 | 5687050 | 28  | 13  | 9  | 16  | 0.6829 | 0.3171 | 0.36   | 0.64   | -0.3229 | 0.4566 |
| Marker36249  | Chr3 | 5761008 | 5761319 | 44  | 30  | 14 | 37  | 0.5946 | 0.4054 | 0.2745 | 0.7255 | -0.3201 | 0.4527 |
| Marker63104  | Chr3 | 5816836 | 5817163 | 34  | 21  | 18 | 19  | 0.6182 | 0.3818 | 0.4865 | 0.5135 | -0.1317 | 0.1863 |
| Marker19608  | Chr3 | 5838502 | 5838846 | 56  | 30  | 30 | 28  | 0.6512 | 0.3488 | 0.5172 | 0.4828 | -0.134  | 0.1895 |
| Markers52152 | Chr3 | 5850761 | 5851084 | 25  | 27  | 16 | 21  | 0.4808 | 0.5192 | 0.4324 | 0.5676 | -0.0484 | 0.0684 |
| Markers59465 | Chr3 | 6102025 | 6102356 | 50  | 19  | 36 | 57  | 0.7246 | 0.2754 | 0.3871 | 0.6129 | -0.3375 | 0.4773 |
| Marker19480  | Chr3 | 6570536 | 6570857 | 29  | 28  | 25 | 20  | 0.5088 | 0.4912 | 0.5556 | 0.4444 | 0.0468  | 0.0662 |
| Marker42931  | Chr3 | 6577155 | 6577477 | 11  | 11  | 16 | 15  | 0.5    | 0.5    | 0.5161 | 0.4839 | 0.0161  | 0.0228 |
| Marker46558  | Chr3 | 6583791 | 6584125 | 23  | 13  | 10 | 13  | 0.6389 | 0.3611 | 0.4348 | 0.5652 | -0.2041 | 0.2886 |
| Marker31088  | Chr3 | 6591010 | 6591328 | 42  | 31  | 20 | 56  | 0.5753 | 0.4247 | 0.2632 | 0.7368 | -0.3121 | 0.4414 |
| Marker5322   | Chr3 | 6623199 | 6623450 | 9   | 7   | 5  | 5   | 0.5625 | 0.4375 | 0.5    | 0.5    | -0.0625 | 0.0884 |
| Marker61572  | Chr3 | 6623842 | 6624149 | 70  | 42  | 35 | 67  | 0.625  | 0.375  | 0.3431 | 0.6569 | -0.2819 | 0.3987 |
| Marker46306  | Chr3 | 6644471 | 6644833 | 12  | 6   | 0  | 7   | 0.6667 | 0.3333 | 0      | 1      | -0.6667 | 0.9429 |
| Markers7666  | Chr3 | 6682318 | 6682599 | 74  | 23  | 19 | 55  | 0.7629 | 0.2371 | 0.2568 | 0.7432 | -0.5061 | 0.7157 |
| Marker23493  | Chr3 | 6690667 | 6690989 | 21  | 13  | 9  | 14  | 0.6176 | 0.3824 | 0.3913 | 0.6087 | -0.2263 | 0.32   |
| Marker14440  | Chr3 | 6706908 | 6707161 | 9   | 3   | 8  | 5   | 0.75   | 0.25   | 0.6154 | 0.3846 | -0.1346 | 0.1904 |
| Marker44996  | Chr3 | 6713906 | 6714265 | 22  | 16  | 15 | 14  | 0.5789 | 0.4211 | 0.5172 | 0.4828 | -0.0617 | 0.0873 |
| Markers53192 | Chr3 | 6719591 | 6719835 | 10  | 6   | 4  | 11  | 0.625  | 0.375  | 0.2667 | 0.7333 | -0.3583 | 0.5067 |
| Marker7525   | Chr3 | 6800795 | 6801133 | 30  | 22  | 12 | 21  | 0.5769 | 0.4231 | 0.3636 | 0.6364 | -0.2133 | 0.3017 |
| Marker27848  | Chr3 | 6854849 | 6855093 | 14  | 9   | 9  | 12  | 0.6087 | 0.3913 | 0.4286 | 0.5714 | -0.1801 | 0.2547 |
| Markers9855  | Chr3 | 6862992 | 6863313 | 39  | 11  | 14 | 35  | 0.78   | 0.22   | 0.2857 | 0.7143 | -0.4943 | 0.699  |
| Marker64560  | Chr3 | 6863316 | 6863634 | 22  | 12  | 13 | 25  | 0.6471 | 0.3529 | 0.3421 | 0.6579 | -0.305  | 0.4313 |
| Marker29069  | Chr3 | 6873658 | 6873946 | 11  | 10  | 5  | 17  | 0.5238 | 0.4762 | 0.2273 | 0.7727 | -0.2965 | 0.4193 |
| Marker42115  | Chr3 | 6909053 | 6909263 | 8   | 3   | 6  | 13  | 0.7273 | 0.2727 | 0.3158 | 0.6842 | -0.4115 | 0.5819 |
| Markers54399 | Chr3 | 6910304 | 6910600 | 68  | 25  | 23 | 59  | 0.7312 | 0.2688 | 0.2805 | 0.7195 | -0.4507 | 0.6374 |
| Marker11683  | Chr3 | 6916830 | 6917109 | 43  | 49  | 35 | 75  | 0.4674 | 0.5326 | 0.3182 | 0.6818 | -0.1492 | 0.211  |
| Markers1551  | Chr3 | 6920534 | 6920844 | 38  | 27  | 31 | 31  | 0.5846 | 0.4154 | 0.5    | 0.5    | -0.0846 | 0.1196 |
| Marker49983  | Chr3 | 6969849 | 6970127 | 122 | 100 | 57 | 139 | 0.5495 | 0.4505 | 0.2908 | 0.7092 | -0.2587 | 0.3659 |
| Markers2924  | Chr3 | 6973733 | 6974020 | 67  | 54  | 30 | 59  | 0.5537 | 0.4463 | 0.3371 | 0.6629 | -0.2166 | 0.3063 |
| Marker40703  | Chr3 | 6975847 | 6976102 | 12  | 9   | 1  | 17  | 0.5714 | 0.4286 | 0.0556 | 0.9444 | -0.5158 | 0.7295 |
| Marker23939  | Chr3 | 6977155 | 6977416 | 30  | 9   | 14 | 23  | 0.7692 | 0.2308 | 0.3784 | 0.6216 | -0.3908 | 0.5527 |
| Marker19361  | Chr3 | 6984026 | 6984345 | 36  | 4   | 17 | 4   | 0.9    | 0.1    | 0.8095 | 0.1905 | -0.0905 | 0.128  |
| Marker28481  | Chr3 | 6993967 | 6994218 | 18  | 7   | 15 | 8   | 0.72   | 0.28   | 0.6522 | 0.3478 | -0.0678 | 0.0959 |
| Marker14779  | Chr3 | 7001017 | 7001329 | 74  | 17  | 70 | 41  | 0.8132 | 0.1868 | 0.6306 | 0.3694 | -0.1826 | 0.2582 |
| Marker12334  | Chr3 | 7009375 | 7009652 | 62  | 26  | 79 | 33  | 0.7045 | 0.2955 | 0.7054 | 0.2946 | 0.0009  | 0.0013 |
| Marker64014  | Chr3 | 7018159 | 7018470 | 74  | 8   | 40 | 15  | 0.9024 | 0.0976 | 0.7273 | 0.2727 | -0.1751 | 0.2476 |
| Marker4766   | Chr3 | 7019347 | 7019618 | 30  | 4   | 5  | 8   | 0.8824 | 0.1176 | 0.3846 | 0.6154 | -0.4978 | 0.704  |
| Marker8388   | Chr3 | 7059429 | 7059700 | 70  | 35  | 34 | 50  | 0.6667 | 0.3333 | 0.4048 | 0.5952 | -0.2619 | 0.3704 |
| Marker41491  | Chr3 | 7080557 | 7080846 | 74  | 40  | 34 | 71  | 0.6491 | 0.3509 | 0.3238 | 0.6762 | -0.3253 | 0.46   |
| Marker17372  | Chr3 | 7086879 | 7087231 | 64  | 29  | 21 | 28  | 0.6882 | 0.3118 | 0.4286 | 0.5714 | -0.2596 | 0.3671 |
| Marker33487  | Chr3 | 7104278 | 7104509 | 8   | 8   | 3  | 13  | 0.5    | 0.5    | 0.1875 | 0.8125 | -0.3125 | 0.4419 |
| Marker63947  | Chr3 | 7113948 | 7114206 | 23  | 21  | 10 | 30  | 0.5227 | 0.4773 | 0.25   | 0.75   | -0.2727 | 0.3857 |
| Marker7930   | Chr3 | 7138417 | 7138659 | 9   | 4   | 6  | 18  | 0.6923 | 0.3077 | 0.25   | 0.75   | -0.4423 | 0.6255 |
| Markers2939  | Chr3 | 7170133 | 7170477 | 37  | 26  | 17 | 57  | 0.5873 | 0.4127 | 0.2297 | 0.7703 | -0.3576 | 0.5057 |
| Marker32591  | Chr3 | 7172149 | 7172427 | 43  | 21  | 21 | 33  | 0.6719 | 0.3281 | 0.3889 | 0.6111 | -0.283  | 0.4002 |
| Marker24283  | Chr3 | 7180027 | 7180314 | 47  | 27  | 18 | 46  | 0.6351 | 0.3649 | 0.2812 | 0.7188 | -0.3539 | 0.5005 |
| Marker42363  | Chr3 | 7181888 | 7182144 | 12  | 6   | 9  | 3   | 0.6667 | 0.3333 | 0.75   | 0.25   | 0.0833  | 0.1178 |
| Markers55035 | Chr3 | 7182147 | 7182414 | 28  | 15  | 10 | 15  | 0.6512 | 0.3488 | 0.4    | 0.6    | -0.2512 | 0.3553 |
| Marker16376  | Chr3 | 7185545 | 7185898 | 19  | 9   | 10 | 16  | 0.6786 | 0.3214 | 0.3846 | 0.6154 | -0.294  | 0.4158 |
| Marker37847  | Chr3 | 7240231 | 7240550 | 40  | 30  | 24 | 38  | 0.5714 | 0.4286 | 0.3871 | 0.6129 | -0.1843 | 0.2606 |
| Marker31618  | Chr3 | 7251564 | 7251834 | 44  | 16  | 25 | 35  | 0.7333 | 0.2667 | 0.4167 | 0.5833 | -0.3166 | 0.4477 |
| Marker17422  | Chr3 | 7254210 | 7254566 | 77  | 35  | 28 | 56  | 0.6875 | 0.3125 | 0.3333 | 0.6667 | -0.3542 | 0.5009 |
| Marker10386  | Chr3 | 7287070 | 7287348 | 76  | 13  | 54 | 18  | 0.8539 | 0.1461 | 0.75   | 0.25   | -0.1039 | 0.1469 |
| Marker18050  | Chr3 | 7292180 | 7292469 | 41  | 5   | 21 | 11  | 0.8913 | 0.1087 | 0.6562 | 0.3438 | -0.2351 | 0.3325 |
| Markers35586 | Chr3 | 7616725 | 7617039 | 64  | 37  | 37 | 38  | 0.6337 | 0.3663 | 0.4933 | 0.5067 | -0.1404 | 0.1986 |
| Marker43567  | Chr3 | 7623396 | 7623689 | 45  | 30  | 5  | 41  | 0.6    | 0.4    | 0.1087 | 0.8913 | -0.4913 | 0.6948 |
| Marker23605  | Chr3 | 7627690 | 7628015 | 29  | 17  | 12 | 15  | 0.6304 | 0.3696 | 0.4444 | 0.5556 | -0.186  | 0.263  |
| Markers7996  | Chr3 | 7634673 | 7634981 | 84  | 32  | 41 | 46  | 0.7241 | 0.2759 | 0.4713 | 0.5287 | -0.2528 | 0.3575 |
| Markers31542 | Chr3 | 7638431 | 7638670 | 10  | 6   | 9  | 4   | 0.625  | 0.375  | 0.6923 | 0.3077 | 0.0673  | 0.0952 |
| Marker37919  | Chr3 | 7660096 | 7660427 | 60  | 20  | 32 | 42  | 0.75   | 0.25   | 0.4324 | 0.5676 | -0.3176 | 0.4492 |
| Marker18390  | Chr3 | 7672645 | 7672958 | 43  | 16  | 20 | 24  | 0.7288 | 0.2712 | 0.4545 | 0.5455 | -0.2743 | 0.3879 |
| Markers5757  | Chr3 | 7674511 | 7674826 | 45  | 42  | 14 | 47  | 0.5172 | 0.4828 | 0.2295 | 0.7705 | -0.2877 | 0.4069 |
| Marker41756  | Chr3 | 7957541 | 7957840 | 42  | 30  | 12 | 45  | 0.5833 | 0.4167 | 0.2105 | 0.7895 | -0.3728 | 0.5272 |

|              |      |          |          |     |    |    |     |        |        |        |        |         |        |
|--------------|------|----------|----------|-----|----|----|-----|--------|--------|--------|--------|---------|--------|
| Marker21935  | Chr3 | 8162594  | 8162852  | 15  | 10 | 2  | 4   | 0.6    | 0.4    | 0.3333 | 0.6667 | -0.2667 | 0.3772 |
| Marker16499  | Chr3 | 8261248  | 8261561  | 75  | 0  | 35 | 2   | 1      | 0      | 0.9459 | 0.0541 | -0.0541 | 0.0765 |
| Marker45019  | Chr3 | 8306357  | 8306661  | 28  | 14 | 7  | 29  | 0.6667 | 0.3333 | 0.1944 | 0.8056 | -0.4723 | 0.6679 |
| Marker4580   | Chr3 | 8312704  | 8313002  | 44  | 42 | 18 | 42  | 0.5116 | 0.4884 | 0.3    | 0.7    | -0.2116 | 0.2992 |
| Markers4398  | Chr3 | 9403056  | 9403394  | 71  | 29 | 54 | 36  | 0.71   | 0.29   | 0.6    | 0.4    | -0.11   | 0.1556 |
| Marker25503  | Chr3 | 9407144  | 9407403  | 19  | 3  | 7  | 1   | 0.8636 | 0.1364 | 0.875  | 0.125  | 0.0114  | 0.0161 |
| Marker54741  | Chr3 | 9438743  | 9439080  | 53  | 14 | 55 | 30  | 0.791  | 0.209  | 0.6471 | 0.3529 | -0.1439 | 0.2035 |
| Marker54991  | Chr3 | 9491034  | 9491295  | 22  | 4  | 21 | 2   | 0.8462 | 0.1538 | 0.913  | 0.087  | 0.0668  | 0.0945 |
| Marker60822  | Chr3 | 9587619  | 9587944  | 33  | 10 | 15 | 19  | 0.7674 | 0.2326 | 0.4412 | 0.5588 | -0.3262 | 0.4613 |
| Marker22798  | Chr3 | 9595456  | 9595788  | 95  | 60 | 60 | 76  | 0.6129 | 0.3871 | 0.4412 | 0.5588 | -0.1717 | 0.2428 |
| Marker53378  | Chr3 | 9596781  | 9597057  | 65  | 28 | 25 | 32  | 0.6989 | 0.3011 | 0.4386 | 0.5614 | -0.2603 | 0.3681 |
| Marker50799  | Chr3 | 9602237  | 9602533  | 60  | 48 | 21 | 47  | 0.5556 | 0.4444 | 0.3088 | 0.6912 | -0.2468 | 0.349  |
| Marker2577   | Chr3 | 9632079  | 9632351  | 43  | 35 | 19 | 43  | 0.5513 | 0.4487 | 0.3065 | 0.6935 | -0.2448 | 0.3462 |
| Marker56184  | Chr3 | 9646419  | 9646701  | 59  | 28 | 23 | 47  | 0.6782 | 0.3218 | 0.3286 | 0.6714 | -0.3496 | 0.4944 |
| Marker12673  | Chr3 | 9653113  | 9653452  | 10  | 8  | 7  | 10  | 0.5556 | 0.4444 | 0.4118 | 0.5882 | -0.1438 | 0.2034 |
| Marker50228  | Chr3 | 9887226  | 9887496  | 80  | 53 | 37 | 48  | 0.6015 | 0.3985 | 0.4353 | 0.5647 | -0.1662 | 0.235  |
| Marker25939  | Chr3 | 10218883 | 10219126 | 12  | 6  | 8  | 6   | 0.6667 | 0.3333 | 0.5714 | 0.4286 | -0.0953 | 0.1348 |
| Marker6345   | Chr3 | 10227192 | 10227501 | 57  | 49 | 27 | 68  | 0.5377 | 0.4623 | 0.2842 | 0.7158 | -0.2535 | 0.3585 |
| Marker38522  | Chr3 | 10229392 | 10229679 | 69  | 56 | 21 | 59  | 0.552  | 0.448  | 0.2625 | 0.7375 | -0.2895 | 0.4094 |
| Marker11644  | Chr3 | 10230767 | 10231044 | 70  | 49 | 24 | 55  | 0.5882 | 0.4118 | 0.3038 | 0.6962 | -0.2844 | 0.4022 |
| Marker23846  | Chr3 | 10359495 | 10359799 | 127 | 59 | 77 | 104 | 0.6828 | 0.3172 | 0.4254 | 0.5746 | -0.2574 | 0.364  |
| Markers52628 | Chr3 | 10360622 | 10360910 | 77  | 20 | 35 | 31  | 0.7938 | 0.2062 | 0.5303 | 0.4697 | -0.2635 | 0.3726 |
| Marker40341  | Chr3 | 10361847 | 10362157 | 69  | 52 | 44 | 101 | 0.5702 | 0.4298 | 0.3034 | 0.6966 | -0.2668 | 0.3773 |
| Marker34396  | Chr3 | 10368414 | 10368690 | 54  | 31 | 38 | 59  | 0.6353 | 0.3647 | 0.3918 | 0.6082 | -0.2435 | 0.3444 |
| Marker30861  | Chr3 | 10374857 | 10375200 | 42  | 12 | 17 | 22  | 0.7778 | 0.2222 | 0.4359 | 0.5641 | -0.3419 | 0.4835 |
| Marker21207  | Chr3 | 10392827 | 10393082 | 26  | 6  | 9  | 3   | 0.8125 | 0.1875 | 0.75   | 0.25   | -0.0625 | 0.0884 |
| Marker33310  | Chr3 | 10393813 | 10394125 | 19  | 14 | 14 | 19  | 0.5758 | 0.4242 | 0.4242 | 0.5758 | -0.1516 | 0.2144 |
| Marker39224  | Chr3 | 10394128 | 10394410 | 61  | 53 | 23 | 72  | 0.5351 | 0.4649 | 0.2421 | 0.7579 | -0.293  | 0.4144 |
| Marker35715  | Chr3 | 10394413 | 10394718 | 42  | 24 | 16 | 40  | 0.6364 | 0.3636 | 0.2857 | 0.7143 | -0.3507 | 0.496  |
| Marker63580  | Chr3 | 10806411 | 10806670 | 11  | 8  | 5  | 24  | 0.5789 | 0.4211 | 0.1724 | 0.8276 | -0.4065 | 0.5749 |
| Marker33933  | Chr3 | 11421390 | 11421680 | 29  | 23 | 10 | 13  | 0.5577 | 0.4423 | 0.4348 | 0.5652 | -0.1229 | 0.1738 |
| Marker1243   | Chr3 | 11861495 | 11861841 | 28  | 3  | 11 | 10  | 0.9032 | 0.0968 | 0.5238 | 0.4762 | -0.3794 | 0.5366 |
| Markers56149 | Chr3 | 12807652 | 12808019 | 17  | 1  | 9  | 6   | 0.9444 | 0.0556 | 0.6    | 0.4    | -0.3444 | 0.4871 |
| Marker13233  | Chr3 | 13116841 | 13117189 | 23  | 5  | 15 | 13  | 0.8214 | 0.1786 | 0.5357 | 0.4643 | -0.2857 | 0.404  |
| Marker27849  | Chr3 | 13138701 | 13139053 | 22  | 4  | 4  | 2   | 0.8462 | 0.1538 | 0.6667 | 0.3333 | -0.1795 | 0.2539 |
| Marker24411  | Chr3 | 13146504 | 13146787 | 42  | 15 | 30 | 14  | 0.7368 | 0.2632 | 0.6818 | 0.3182 | -0.055  | 0.0778 |
| Marker10610  | Chr3 | 13352773 | 13353056 | 95  | 62 | 54 | 60  | 0.6051 | 0.3949 | 0.4737 | 0.5263 | -0.1314 | 0.1858 |
| Marker34659  | Chr3 | 13442194 | 13442491 | 24  | 5  | 25 | 12  | 0.8276 | 0.1724 | 0.6757 | 0.3243 | -0.1519 | 0.2148 |
| Marker26105  | Chr3 | 13525125 | 13525384 | 25  | 5  | 14 | 6   | 0.8333 | 0.1667 | 0.7    | 0.3    | -0.1333 | 0.1885 |
| Marker54334  | Chr3 | 13558667 | 13558966 | 33  | 2  | 33 | 9   | 0.9429 | 0.0571 | 0.7857 | 0.2143 | -0.1572 | 0.2223 |
| Marker9302   | Chr3 | 13642306 | 13642573 | 57  | 27 | 12 | 20  | 0.6786 | 0.3214 | 0.375  | 0.625  | -0.3036 | 0.4294 |
| Marker19212  | Chr3 | 14598853 | 14599130 | 34  | 44 | 16 | 28  | 0.4359 | 0.5641 | 0.3636 | 0.6364 | -0.0723 | 0.1022 |
| Marker36573  | Chr3 | 15243066 | 15243323 | 19  | 4  | 4  | 8   | 0.8261 | 0.1739 | 0.3333 | 0.6667 | -0.4928 | 0.6969 |
| Marker25260  | Chr3 | 15383852 | 15384118 | 30  | 16 | 17 | 18  | 0.6522 | 0.3478 | 0.4857 | 0.5143 | -0.1665 | 0.2355 |
| Marker63186  | Chr3 | 16299010 | 16299339 | 58  | 10 | 48 | 14  | 0.8529 | 0.1471 | 0.7742 | 0.2258 | -0.0787 | 0.1113 |
| Markers1089  | Chr3 | 16535723 | 16536066 | 25  | 12 | 20 | 7   | 0.6757 | 0.3243 | 0.7407 | 0.2593 | 0.065   | 0.0919 |
| Markers4292  | Chr3 | 16572290 | 16572609 | 45  | 14 | 35 | 7   | 0.7627 | 0.2373 | 0.8333 | 0.1667 | 0.0706  | 0.0998 |
| Marker25445  | Chr3 | 16972564 | 16972875 | 43  | 43 | 47 | 46  | 0.5    | 0.5    | 0.5054 | 0.4946 | 0.0054  | 0.0076 |
| Marker11277  | Chr3 | 17057087 | 17057352 | 39  | 7  | 34 | 7   | 0.8478 | 0.1522 | 0.8293 | 0.1707 | -0.0185 | 0.0262 |
| Marker14154  | Chr3 | 17205712 | 17205982 | 8   | 9  | 12 | 3   | 0.4706 | 0.5294 | 0.8    | 0.2    | 0.3294  | 0.4658 |
| Marker6124   | Chr3 | 17214984 | 17215276 | 44  | 67 | 21 | 37  | 0.3964 | 0.6036 | 0.3621 | 0.6379 | -0.0343 | 0.0485 |
| Markers51428 | Chr3 | 17225184 | 17225473 | 23  | 50 | 30 | 53  | 0.3151 | 0.6849 | 0.3614 | 0.6386 | 0.0463  | 0.0655 |
| Marker962    | Chr3 | 18763083 | 18763346 | 27  | 15 | 11 | 16  | 0.6429 | 0.3571 | 0.4074 | 0.5926 | -0.2355 | 0.333  |
| Markers4557  | Chr3 | 18770416 | 18770778 | 6   | 5  | 3  | 8   | 0.5455 | 0.4545 | 0.2727 | 0.7273 | -0.2728 | 0.3858 |
| Marker25470  | Chr3 | 18795139 | 18795446 | 42  | 52 | 22 | 37  | 0.4468 | 0.5532 | 0.3729 | 0.6271 | -0.0739 | 0.1045 |
| Marker34657  | Chr3 | 18802889 | 18803181 | 30  | 48 | 17 | 40  | 0.3846 | 0.6154 | 0.2982 | 0.7018 | -0.0864 | 0.1222 |
| Marker3921   | Chr3 | 18808302 | 18808605 | 72  | 36 | 23 | 64  | 0.6667 | 0.3333 | 0.2644 | 0.7356 | -0.4023 | 0.5689 |
| Marker37434  | Chr3 | 18925138 | 18925387 | 18  | 11 | 9  | 13  | 0.6207 | 0.3793 | 0.4091 | 0.5909 | -0.2116 | 0.2992 |
| Marker49048  | Chr3 | 18928090 | 18928338 | 5   | 3  | 1  | 4   | 0.625  | 0.375  | 0.2    | 0.8    | -0.425  | 0.601  |
| Marker27962  | Chr3 | 18940687 | 18940968 | 72  | 64 | 40 | 69  | 0.5294 | 0.4706 | 0.367  | 0.633  | -0.1624 | 0.2297 |
| Marker4555   | Chr3 | 18948660 | 18949012 | 34  | 43 | 28 | 29  | 0.4416 | 0.5584 | 0.4912 | 0.5088 | 0.0496  | 0.0701 |
| Marker19383  | Chr3 | 18996519 | 18996857 | 8   | 11 | 1  | 6   | 0.4211 | 0.5789 | 0.1429 | 0.8571 | -0.2782 | 0.3934 |
| Marker13893  | Chr3 | 19058300 | 19058659 | 41  | 37 | 32 | 42  | 0.5256 | 0.4744 | 0.4324 | 0.5676 | -0.0932 | 0.1318 |
| Marker41417  | Chr3 | 19063932 | 19064194 | 33  | 36 | 10 | 31  | 0.4783 | 0.5217 | 0.2439 | 0.7561 | -0.2344 | 0.3315 |
| Markers53524 | Chr3 | 19064197 | 19064512 | 45  | 30 | 18 | 49  | 0.6    | 0.4    | 0.2687 | 0.7313 | -0.3313 | 0.4685 |
| Marker40426  | Chr3 | 19066684 | 19066969 | 52  | 33 | 14 | 26  | 0.6118 | 0.3882 | 0.35   | 0.65   | -0.2618 | 0.3702 |
| Marker16697  | Chr3 | 19066972 | 19067231 | 12  | 18 | 12 | 23  | 0.4    | 0.6    | 0.3429 | 0.6571 | -0.0571 | 0.0808 |
| Markers35989 | Chr3 | 19073890 | 19074202 | 24  | 25 | 9  | 34  | 0.4898 | 0.5102 | 0.2093 | 0.7907 | -0.2805 | 0.3967 |
| Marker35776  | Chr3 | 19106361 | 19106678 | 57  | 52 | 19 | 27  | 0.5229 | 0.4771 | 0.413  | 0.587  | -0.1099 | 0.1554 |
| Marker17791  | Chr3 | 19113123 | 19113404 | 33  | 33 | 26 | 39  | 0.5    | 0.5    | 0.4    | 0.6    | -0.1    | 0.1414 |
| Marker48297  | Chr3 | 19121184 | 19121490 | 55  | 55 | 44 | 50  | 0.5    | 0.5    | 0.4681 | 0.5319 | -0.0319 | 0.0451 |
| Marker44606  | Chr3 | 19148596 | 19148892 | 37  | 41 | 20 | 30  | 0.4744 | 0.5256 | 0.4    | 0.6    | -0.0744 | 0.1052 |
| Marker40439  | Chr3 | 19156728 | 19157082 | 8   | 11 | 6  | 6   | 0.4211 | 0.5789 | 0.5    | 0.5    | 0.0789  | 0.1116 |
| Markers59544 | Chr3 | 19165260 | 19165532 | 16  | 22 | 12 | 10  | 0.4211 | 0.5789 | 0.5455 | 0.4545 | 0.1244  | 0.1759 |
| Marker768    | Chr3 | 19194363 | 19194627 | 9   | 24 | 5  | 11  | 0.2727 | 0.7273 | 0.3125 | 0.6875 | 0.0398  | 0.0563 |
| Marker26598  | Chr3 | 19205484 | 19205758 | 41  | 22 | 10 | 39  | 0.6508 | 0.3492 | 0.2041 | 0.7959 | -0.4467 | 0.6317 |
| Marker50919  | Chr3 | 19208618 | 19208973 | 25  | 17 | 8  | 22  | 0.5952 | 0.4048 | 0.2667 | 0.7333 | -0.3285 | 0.4646 |
| Marker47522  | Chr3 | 19225719 | 19226018 | 22  | 15 | 16 | 27  | 0.5946 | 0.4054 | 0.3721 | 0.6279 | -0.2225 | 0.3147 |
| Marker7006   | Chr3 | 19295822 | 19296119 | 29  | 16 | 11 | 20  | 0.6444 | 0.3556 | 0.3548 | 0.6452 | -0.2896 | 0.4096 |
| Marker5383   | Chr3 | 19431500 | 19431815 | 32  | 8  | 33 | 9   | 0.8    | 0.2    | 0.7857 | 0.2143 | -0.0143 | 0.0202 |
| Marker12682  | Chr3 | 20649101 | 20649349 | 9   | 0  | 12 | 1   | 1      | 0      | 0.9231 | 0.0769 | -0.0769 | 0.1088 |
| Marker33876  | Chr3 | 20651240 | 20651531 | 100 | 19 | 78 | 25  | 0.8403 | 0.1597 | 0.7573 | 0.2427 | -0.083  | 0.1174 |

|             |      |          |          |     |     |     |     |        |        |        |        |         |        |
|-------------|------|----------|----------|-----|-----|-----|-----|--------|--------|--------|--------|---------|--------|
| Marker57253 | Chr3 | 20700493 | 20700762 | 62  | 4   | 34  | 7   | 0.9394 | 0.0606 | 0.8293 | 0.1707 | -0.1101 | 0.1557 |
| Marker50846 | Chr3 | 20704321 | 20704683 | 28  | 11  | 18  | 7   | 0.7179 | 0.2821 | 0.72   | 0.28   | 0.0021  | 0.003  |
| Marker923   | Chr3 | 20725393 | 20725724 | 75  | 7   | 61  | 26  | 0.9146 | 0.0854 | 0.7011 | 0.2989 | -0.2135 | 0.3019 |
| Marker18167 | Chr3 | 20732625 | 20732896 | 48  | 13  | 36  | 12  | 0.7869 | 0.2131 | 0.75   | 0.25   | -0.0369 | 0.0522 |
| Marker12660 | Chr3 | 20747440 | 20747762 | 38  | 32  | 26  | 22  | 0.5429 | 0.4571 | 0.5417 | 0.4583 | -0.0012 | 0.0017 |
| Marker5146  | Chr3 | 20751905 | 20752188 | 4   | 12  | 6   | 14  | 0.25   | 0.75   | 0.3    | 0.7    | 0.05    | 0.0707 |
| Marker10224 | Chr3 | 20759358 | 20759676 | 41  | 63  | 34  | 33  | 0.3942 | 0.6058 | 0.5075 | 0.4925 | 0.1133  | 0.1602 |
| Marker60115 | Chr3 | 20765615 | 20765926 | 34  | 32  | 25  | 41  | 0.5152 | 0.4848 | 0.3788 | 0.6212 | -0.1364 | 0.1929 |
| Marker52183 | Chr3 | 20786152 | 20786420 | 40  | 45  | 21  | 55  | 0.4706 | 0.5294 | 0.2763 | 0.7237 | -0.1943 | 0.2748 |
| Marker51494 | Chr3 | 20830129 | 20830449 | 77  | 81  | 64  | 87  | 0.4873 | 0.5127 | 0.4238 | 0.5762 | -0.0635 | 0.0898 |
| Marker14687 | Chr3 | 20850068 | 20850414 | 19  | 32  | 20  | 35  | 0.3725 | 0.6275 | 0.3636 | 0.6364 | -0.0089 | 0.0126 |
| Marker13650 | Chr3 | 21910490 | 21910780 | 59  | 5   | 43  | 9   | 0.9219 | 0.0781 | 0.8269 | 0.1731 | -0.095  | 0.1344 |
| Marker20598 | Chr3 | 22579508 | 22579710 | 12  | 15  | 13  | 14  | 0.4444 | 0.5556 | 0.4815 | 0.5185 | 0.0371  | 0.0525 |
| Marker1376  | Chr3 | 22585825 | 22586048 | 10  | 8   | 15  | 5   | 0.5556 | 0.4444 | 0.75   | 0.25   | 0.1944  | 0.2749 |
| Marker17536 | Chr3 | 22591246 | 22591505 | 6   | 10  | 4   | 6   | 0.375  | 0.625  | 0.4    | 0.6    | 0.025   | 0.0354 |
| Marker54840 | Chr3 | 22595119 | 22595391 | 23  | 24  | 16  | 20  | 0.4894 | 0.5106 | 0.4444 | 0.5556 | -0.045  | 0.0636 |
| Marker46927 | Chr3 | 22634097 | 22634449 | 11  | 14  | 8   | 13  | 0.44   | 0.56   | 0.381  | 0.619  | -0.059  | 0.0834 |
| Marker64096 | Chr3 | 22639426 | 22639698 | 53  | 25  | 19  | 71  | 0.6795 | 0.3205 | 0.2111 | 0.7889 | -0.4684 | 0.6624 |
| Marker51236 | Chr3 | 22642557 | 22642863 | 22  | 37  | 29  | 49  | 0.3729 | 0.6271 | 0.3718 | 0.6282 | -0.0011 | 0.0016 |
| Marker3596  | Chr3 | 22662544 | 22662801 | 11  | 13  | 8   | 14  | 0.4583 | 0.5417 | 0.3636 | 0.6364 | -0.0947 | 0.1339 |
| Marker53226 | Chr3 | 22665276 | 22665560 | 38  | 31  | 19  | 40  | 0.5507 | 0.4493 | 0.322  | 0.678  | -0.2287 | 0.3234 |
| Marker23292 | Chr3 | 22893585 | 22893845 | 8   | 3   | 4   | 4   | 0.7273 | 0.2727 | 0.5    | 0.5    | -0.2273 | 0.3215 |
| Marker41696 | Chr3 | 23641702 | 23641991 | 51  | 50  | 31  | 38  | 0.505  | 0.495  | 0.4493 | 0.5507 | -0.0557 | 0.0788 |
| Marker53100 | Chr3 | 23642842 | 23643096 | 4   | 7   | 6   | 7   | 0.3636 | 0.6364 | 0.4615 | 0.5385 | 0.0979  | 0.1385 |
| Marker56728 | Chr3 | 23723313 | 23723597 | 50  | 88  | 21  | 69  | 0.3623 | 0.6377 | 0.2333 | 0.7667 | -0.129  | 0.1824 |
| Marker7678  | Chr3 | 23732545 | 23732824 | 59  | 61  | 36  | 57  | 0.4917 | 0.5083 | 0.3871 | 0.6129 | -0.1046 | 0.1479 |
| Marker63353 | Chr3 | 23760966 | 23761250 | 58  | 50  | 30  | 56  | 0.537  | 0.463  | 0.3488 | 0.6512 | -0.1882 | 0.2662 |
| Marker48227 | Chr3 | 23762728 | 23763058 | 33  | 58  | 39  | 40  | 0.3626 | 0.6374 | 0.4937 | 0.5063 | 0.1311  | 0.1854 |
| Marker42458 | Chr3 | 23772440 | 23772647 | 46  | 4   | 29  | 2   | 0.92   | 0.08   | 0.9355 | 0.0645 | 0.0155  | 0.0219 |
| Marker61925 | Chr3 | 23773444 | 23773796 | 21  | 17  | 15  | 13  | 0.5526 | 0.4474 | 0.5357 | 0.4643 | -0.0169 | 0.0239 |
| Marker37493 | Chr3 | 23779421 | 23779697 | 42  | 50  | 48  | 32  | 0.4565 | 0.5435 | 0.6    | 0.4    | 0.1435  | 0.2029 |
| Marker18804 | Chr3 | 23785761 | 23786093 | 12  | 13  | 7   | 12  | 0.48   | 0.52   | 0.3684 | 0.6316 | -0.1116 | 0.1578 |
| Marker51784 | Chr3 | 23933677 | 23934036 | 14  | 26  | 9   | 18  | 0.35   | 0.65   | 0.3333 | 0.6667 | -0.0167 | 0.0236 |
| Marker62031 | Chr3 | 23934228 | 23934533 | 21  | 15  | 17  | 12  | 0.5833 | 0.4167 | 0.5862 | 0.4138 | 0.0029  | 0.0041 |
| Marker7535  | Chr3 | 23953947 | 23954225 | 45  | 43  | 29  | 48  | 0.5114 | 0.4886 | 0.3766 | 0.6234 | -0.1348 | 0.1906 |
| Marker49462 | Chr3 | 23995027 | 23995355 | 46  | 41  | 30  | 29  | 0.5287 | 0.4713 | 0.5085 | 0.4915 | -0.0202 | 0.0286 |
| Marker49460 | Chr3 | 23997018 | 23997263 | 10  | 16  | 11  | 14  | 0.3846 | 0.6154 | 0.44   | 0.56   | 0.0554  | 0.0783 |
| Marker6043  | Chr3 | 24009931 | 24010211 | 34  | 32  | 25  | 33  | 0.5152 | 0.4848 | 0.431  | 0.569  | -0.0842 | 0.1191 |
| Marker18166 | Chr3 | 24018057 | 24018367 | 14  | 11  | 8   | 15  | 0.56   | 0.44   | 0.3478 | 0.6522 | -0.2122 | 0.3001 |
| Marker22161 | Chr3 | 24026348 | 24026669 | 14  | 21  | 11  | 20  | 0.4    | 0.6    | 0.3548 | 0.6452 | -0.0452 | 0.0639 |
| Marker39536 | Chr3 | 24153362 | 24153629 | 9   | 5   | 6   | 12  | 0.6429 | 0.3571 | 0.3333 | 0.6667 | -0.3096 | 0.4378 |
| Marker54654 | Chr3 | 24175972 | 24176278 | 26  | 22  | 18  | 27  | 0.5417 | 0.4583 | 0.4    | 0.6    | -0.1417 | 0.2004 |
| Marker38485 | Chr3 | 24567345 | 24567648 | 51  | 43  | 21  | 32  | 0.5426 | 0.4574 | 0.3962 | 0.6038 | -0.1464 | 0.207  |
| Marker6455  | Chr3 | 24569812 | 24570123 | 30  | 34  | 38  | 44  | 0.4688 | 0.5312 | 0.4634 | 0.5366 | -0.0054 | 0.0076 |
| Marker24307 | Chr3 | 24575509 | 24575867 | 11  | 9   | 10  | 5   | 0.55   | 0.45   | 0.6667 | 0.3333 | 0.1167  | 0.165  |
| Marker29013 | Chr3 | 24591106 | 24591369 | 14  | 17  | 15  | 12  | 0.4516 | 0.5484 | 0.5556 | 0.4444 | 0.104   | 0.1471 |
| Marker10160 | Chr3 | 24617206 | 24617490 | 41  | 26  | 25  | 19  | 0.6119 | 0.3881 | 0.5682 | 0.4318 | -0.0437 | 0.0618 |
| Marker17296 | Chr3 | 24688549 | 24688891 | 19  | 5   | 2   | 7   | 0.7917 | 0.2083 | 0.2222 | 0.7778 | -0.5695 | 0.8054 |
| Marker35347 | Chr3 | 24698439 | 24698777 | 45  | 20  | 21  | 19  | 0.6923 | 0.3077 | 0.525  | 0.475  | -0.1673 | 0.2366 |
| Marker28865 | Chr3 | 24782505 | 24782767 | 7   | 12  | 5   | 5   | 0.3684 | 0.6316 | 0.5    | 0.5    | 0.1316  | 0.1861 |
| Marker19039 | Chr3 | 24827157 | 24827516 | 23  | 14  | 10  | 14  | 0.6216 | 0.3784 | 0.4167 | 0.5833 | -0.2049 | 0.2898 |
| Marker11411 | Chr3 | 24878972 | 24879313 | 27  | 6   | 6   | 7   | 0.8182 | 0.1818 | 0.4615 | 0.5385 | -0.3567 | 0.5044 |
| Marker48059 | Chr3 | 24970540 | 24970783 | 12  | 5   | 12  | 10  | 0.7059 | 0.2941 | 0.5455 | 0.4545 | -0.1604 | 0.2268 |
| Marker60351 | Chr3 | 24981288 | 24981621 | 28  | 31  | 29  | 31  | 0.4746 | 0.5254 | 0.4833 | 0.5167 | 0.0087  | 0.0123 |
| Marker13849 | Chr3 | 24981624 | 24981946 | 28  | 34  | 27  | 23  | 0.4516 | 0.5484 | 0.54   | 0.46   | 0.0884  | 0.125  |
| Marker62868 | Chr3 | 24983933 | 24984258 | 42  | 29  | 17  | 33  | 0.5915 | 0.4085 | 0.34   | 0.66   | -0.2515 | 0.3557 |
| Marker6595  | Chr3 | 24985679 | 24985945 | 22  | 16  | 13  | 1   | 0.5789 | 0.4211 | 0.9286 | 0.0714 | 0.3497  | 0.4946 |
| Marker23296 | Chr3 | 25006027 | 25006331 | 33  | 33  | 30  | 28  | 0.5    | 0.5    | 0.5172 | 0.4828 | 0.0172  | 0.0243 |
| Marker35286 | Chr3 | 25014898 | 25015176 | 33  | 37  | 31  | 27  | 0.4714 | 0.5286 | 0.5345 | 0.4655 | 0.0631  | 0.0892 |
| Marker56398 | Chr3 | 25025449 | 25025775 | 35  | 34  | 23  | 23  | 0.5072 | 0.4928 | 0.5    | 0.5    | -0.0072 | 0.0102 |
| Marker39395 | Chr3 | 25025987 | 25026290 | 68  | 53  | 19  | 34  | 0.562  | 0.438  | 0.3585 | 0.6415 | -0.2035 | 0.2878 |
| Marker55980 | Chr3 | 25032985 | 25033277 | 196 | 191 | 196 | 226 | 0.5065 | 0.4935 | 0.4645 | 0.5355 | -0.042  | 0.0594 |
| Marker61169 | Chr3 | 25076469 | 25076794 | 35  | 20  | 37  | 24  | 0.6364 | 0.3636 | 0.6066 | 0.3934 | -0.0298 | 0.0421 |
| Marker17668 | Chr3 | 25124211 | 25124464 | 12  | 15  | 9   | 17  | 0.4444 | 0.5556 | 0.3462 | 0.6538 | -0.0982 | 0.1389 |
| Marker47149 | Chr3 | 25163154 | 25163428 | 44  | 25  | 15  | 21  | 0.6377 | 0.3623 | 0.4167 | 0.5833 | -0.221  | 0.3125 |
| Marker22597 | Chr3 | 25177372 | 25177709 | 34  | 21  | 27  | 26  | 0.6182 | 0.3818 | 0.5094 | 0.4906 | -0.1088 | 0.1539 |
| Marker32402 | Chr3 | 25204110 | 25204342 | 6   | 8   | 4   | 11  | 0.4286 | 0.5714 | 0.2667 | 0.7333 | -0.1619 | 0.229  |
| Marker25449 | Chr3 | 25226337 | 25226577 | 7   | 3   | 9   | 7   | 0.7    | 0.3    | 0.5625 | 0.4375 | -0.1375 | 0.1945 |
| Marker47516 | Chr3 | 25256783 | 25257104 | 37  | 38  | 42  | 17  | 0.4933 | 0.5067 | 0.7119 | 0.2881 | 0.2186  | 0.3091 |
| Marker51533 | Chr3 | 25274353 | 25274625 | 32  | 30  | 32  | 33  | 0.5161 | 0.4839 | 0.4923 | 0.5077 | -0.0238 | 0.0337 |
| Marker27024 | Chr3 | 25276890 | 25277250 | 9   | 7   | 5   | 5   | 0.5625 | 0.4375 | 0.5    | 0.5    | -0.0625 | 0.0884 |
| Marker31485 | Chr3 | 25278044 | 25278362 | 56  | 34  | 36  | 19  | 0.6222 | 0.3778 | 0.6545 | 0.3455 | 0.0323  | 0.0457 |
| Marker19657 | Chr3 | 25281292 | 25281568 | 26  | 27  | 12  | 28  | 0.4906 | 0.5094 | 0.3    | 0.7    | -0.1906 | 0.2695 |
| Marker41806 | Chr3 | 25285521 | 25285836 | 33  | 29  | 21  | 19  | 0.5323 | 0.4677 | 0.525  | 0.475  | -0.0073 | 0.0103 |
| Marker6822  | Chr3 | 25293144 | 25293406 | 37  | 26  | 24  | 12  | 0.5873 | 0.4127 | 0.6667 | 0.3333 | 0.0794  | 0.1123 |
| Marker33425 | Chr3 | 25319034 | 25319310 | 89  | 47  | 59  | 39  | 0.6544 | 0.3456 | 0.602  | 0.398  | -0.0524 | 0.0741 |
| Marker25533 | Chr3 | 25466548 | 25466843 | 67  | 47  | 59  | 10  | 0.5877 | 0.4123 | 0.8551 | 0.1449 | 0.2674  | 0.3782 |
| Marker44233 | Chr3 | 25484686 | 25485007 | 61  | 26  | 63  | 24  | 0.7011 | 0.2989 | 0.7241 | 0.2759 | 0.023   | 0.0325 |
| Marker46635 | Chr3 | 25487689 | 25487967 | 102 | 23  | 54  | 40  | 0.816  | 0.184  | 0.5745 | 0.4255 | -0.2415 | 0.3415 |
| Marker35922 | Chr3 | 25487970 | 25488327 | 19  | 4   | 10  | 9   | 0.8261 | 0.1739 | 0.5263 | 0.4737 | -0.2998 | 0.424  |
| Marker26956 | Chr3 | 25503466 | 25503788 | 107 | 46  | 83  | 44  | 0.6993 | 0.3007 | 0.6535 | 0.3465 | -0.0458 | 0.0648 |
| Marker44431 | Chr3 | 25503932 | 25504212 | 47  | 29  | 33  | 19  | 0.6184 | 0.3816 | 0.6346 | 0.3654 | 0.0162  | 0.0229 |

|             |      |          |          |    |    |    |    |        |        |        |        |         |        |
|-------------|------|----------|----------|----|----|----|----|--------|--------|--------|--------|---------|--------|
| Marker34903 | Chr3 | 25504215 | 25504491 | 79 | 21 | 41 | 28 | 0.79   | 0.21   | 0.5942 | 0.4058 | -0.1958 | 0.2769 |
| Marker39681 | Chr3 | 25504563 | 25504808 | 16 | 5  | 6  | 2  | 0.7619 | 0.2381 | 0.75   | 0.25   | -0.0119 | 0.0168 |
| Marker24883 | Chr3 | 25518577 | 25518869 | 56 | 11 | 43 | 30 | 0.8358 | 0.1642 | 0.589  | 0.411  | -0.2468 | 0.349  |
| Marker23631 | Chr3 | 25534687 | 25535046 | 25 | 18 | 15 | 12 | 0.5814 | 0.4186 | 0.5556 | 0.4444 | -0.0258 | 0.0365 |
| Marker33379 | Chr3 | 25548315 | 25548627 | 33 | 22 | 20 | 25 | 0.6    | 0.4    | 0.4444 | 0.5556 | -0.1556 | 0.2201 |
| Marker10002 | Chr3 | 25551025 | 25551345 | 22 | 20 | 5  | 18 | 0.5238 | 0.4762 | 0.2174 | 0.7826 | -0.3064 | 0.4333 |
| Marker60466 | Chr3 | 25553142 | 25553425 | 56 | 53 | 44 | 38 | 0.5138 | 0.4862 | 0.5366 | 0.4634 | 0.0228  | 0.0322 |
| Marker22256 | Chr3 | 25576059 | 25576382 | 30 | 5  | 13 | 11 | 0.8571 | 0.1429 | 0.5417 | 0.4583 | -0.3154 | 0.446  |
| Marker29854 | Chr3 | 25874598 | 25874884 | 44 | 24 | 28 | 31 | 0.6471 | 0.3529 | 0.4746 | 0.5254 | -0.1725 | 0.244  |
| Marker37754 | Chr3 | 25883638 | 25883976 | 50 | 30 | 38 | 50 | 0.625  | 0.375  | 0.4318 | 0.5682 | -0.1932 | 0.2732 |
| Marker8279  | Chr3 | 25889902 | 25890162 | 15 | 20 | 9  | 12 | 0.4286 | 0.5714 | 0.4286 | 0.5714 | 0       | 0      |
| Marker49107 | Chr3 | 25892548 | 25892819 | 57 | 56 | 21 | 36 | 0.5044 | 0.4956 | 0.3684 | 0.6316 | -0.136  | 0.1923 |
| Marker17646 | Chr3 | 25893720 | 25894049 | 22 | 21 | 9  | 14 | 0.5116 | 0.4884 | 0.3913 | 0.6087 | -0.1203 | 0.1701 |
| Marker49566 | Chr3 | 25900361 | 25900627 | 26 | 19 | 21 | 13 | 0.5778 | 0.4222 | 0.6176 | 0.3824 | 0.0398  | 0.0563 |
| Marker48140 | Chr3 | 25913594 | 25913909 | 34 | 26 | 36 | 23 | 0.5667 | 0.4333 | 0.6102 | 0.3898 | 0.0435  | 0.0615 |
| Marker9191  | Chr3 | 25915566 | 25915867 | 13 | 2  | 20 | 3  | 0.8667 | 0.1333 | 0.8696 | 0.1304 | 0.0029  | 0.0041 |
| Marker10503 | Chr3 | 26034570 | 26034881 | 35 | 18 | 17 | 22 | 0.6604 | 0.3396 | 0.4359 | 0.5641 | -0.2245 | 0.3175 |
| Marker27813 | Chr3 | 26046956 | 26047292 | 45 | 47 | 48 | 51 | 0.4891 | 0.5109 | 0.4848 | 0.5152 | -0.0043 | 0.0061 |
| Marker64513 | Chr3 | 26201508 | 26201846 | 24 | 32 | 19 | 18 | 0.4286 | 0.5714 | 0.5135 | 0.4865 | 0.0849  | 0.1201 |
| Marker47759 | Chr3 | 26204653 | 26204953 | 68 | 56 | 35 | 30 | 0.5484 | 0.4516 | 0.5385 | 0.4615 | -0.0099 | 0.014  |
| Marker33305 | Chr3 | 26223549 | 26223823 | 38 | 30 | 18 | 36 | 0.5588 | 0.4412 | 0.3333 | 0.6667 | -0.2255 | 0.3189 |
| Marker45531 | Chr3 | 26496626 | 26496874 | 10 | 9  | 14 | 9  | 0.5263 | 0.4737 | 0.6087 | 0.3913 | 0.0824  | 0.1165 |
| Marker61072 | Chr3 | 26529640 | 26529981 | 22 | 15 | 12 | 13 | 0.5946 | 0.4054 | 0.48   | 0.52   | -0.1146 | 0.1621 |
| Marker63477 | Chr3 | 26758380 | 26758719 | 75 | 31 | 44 | 32 | 0.7075 | 0.2925 | 0.5789 | 0.4211 | -0.1286 | 0.1819 |
| Marker47459 | Chr3 | 26764175 | 26764433 | 21 | 11 | 15 | 12 | 0.6562 | 0.3438 | 0.5556 | 0.4444 | -0.1006 | 0.1423 |
| Marker52357 | Chr3 | 26772821 | 26773134 | 41 | 30 | 39 | 25 | 0.5775 | 0.4225 | 0.6094 | 0.3906 | 0.0319  | 0.0451 |
| Marker55264 | Chr3 | 26797518 | 26797811 | 47 | 30 | 38 | 80 | 0.6104 | 0.3896 | 0.322  | 0.678  | -0.2884 | 0.4079 |
| Marker24340 | Chr3 | 26803154 | 26803513 | 15 | 17 | 4  | 9  | 0.4688 | 0.5312 | 0.3077 | 0.6923 | -0.1611 | 0.2278 |
| Marker35817 | Chr3 | 26990711 | 26990980 | 57 | 58 | 56 | 40 | 0.4957 | 0.5043 | 0.5833 | 0.4167 | 0.0876  | 0.1239 |
| Marker60520 | Chr3 | 26992937 | 26993216 | 63 | 39 | 66 | 65 | 0.6176 | 0.3824 | 0.5038 | 0.4962 | -0.1138 | 0.1609 |
| Marker47080 | Chr3 | 28267536 | 28267769 | 7  | 5  | 3  | 2  | 0.5833 | 0.4167 | 0.6    | 0.4    | 0.0167  | 0.0236 |
| Marker34610 | Chr3 | 28270181 | 28270531 | 48 | 27 | 43 | 18 | 0.64   | 0.36   | 0.7049 | 0.2951 | 0.0649  | 0.0918 |
| Marker54686 | Chr3 | 28270534 | 28270895 | 12 | 8  | 14 | 7  | 0.6    | 0.4    | 0.6667 | 0.3333 | 0.0667  | 0.0943 |
| Marker8739  | Chr3 | 28291573 | 28291880 | 28 | 15 | 12 | 23 | 0.6512 | 0.3488 | 0.3429 | 0.6571 | -0.3083 | 0.436  |
| Marker17145 | Chr3 | 28354203 | 28354541 | 33 | 37 | 43 | 25 | 0.4714 | 0.5286 | 0.6324 | 0.3676 | 0.161   | 0.2277 |
| Marker62039 | Chr3 | 28480255 | 28480545 | 55 | 71 | 26 | 38 | 0.4365 | 0.5635 | 0.4062 | 0.5938 | -0.0303 | 0.0429 |
| Marker47392 | Chr3 | 28515187 | 28515479 | 57 | 36 | 23 | 22 | 0.6129 | 0.3871 | 0.5111 | 0.4889 | -0.1018 | 0.144  |
| Marker48741 | Chr3 | 28561579 | 28561848 | 8  | 9  | 9  | 4  | 0.4706 | 0.5294 | 0.6923 | 0.3077 | 0.2217  | 0.3135 |
| Marker55177 | Chr3 | 28609489 | 28609758 | 33 | 33 | 16 | 16 | 0.5    | 0.5    | 0.5    | 0.5    | 0       | 0      |
| Marker47116 | Chr3 | 28640780 | 28641025 | 6  | 5  | 3  | 2  | 0.5455 | 0.4545 | 0.6    | 0.4    | 0.0545  | 0.0771 |
| Marker57396 | Chr3 | 28663892 | 28664177 | 28 | 14 | 10 | 20 | 0.6667 | 0.3333 | 0.3333 | 0.6667 | -0.3334 | 0.4715 |
| Marker47171 | Chr3 | 28828904 | 28829261 | 10 | 7  | 5  | 4  | 0.5882 | 0.4118 | 0.5556 | 0.4444 | -0.0326 | 0.0461 |
| Marker11239 | Chr3 | 29092240 | 29092531 | 47 | 48 | 43 | 38 | 0.4947 | 0.5053 | 0.5309 | 0.4691 | 0.0362  | 0.0512 |
| Marker62978 | Chr3 | 29098302 | 29098564 | 80 | 70 | 74 | 36 | 0.5333 | 0.4667 | 0.6727 | 0.3273 | 0.1394  | 0.1971 |
| Marker55228 | Chr3 | 29099392 | 29099745 | 23 | 20 | 20 | 19 | 0.5349 | 0.4651 | 0.5128 | 0.4872 | -0.0221 | 0.0313 |
| Marker26186 | Chr3 | 30329167 | 30329495 | 25 | 31 | 36 | 29 | 0.4464 | 0.5536 | 0.5538 | 0.4462 | 0.1074  | 0.1519 |
| Marker36055 | Chr3 | 30399504 | 30399857 | 20 | 19 | 10 | 10 | 0.5128 | 0.4872 | 0.5    | 0.5    | -0.0128 | 0.0181 |
| Marker31157 | Chr3 | 30399860 | 30400195 | 13 | 10 | 8  | 6  | 0.5652 | 0.4348 | 0.5714 | 0.4286 | 0.0062  | 0.0088 |
| Marker49508 | Chr3 | 30435146 | 30435407 | 26 | 6  | 16 | 13 | 0.8125 | 0.1875 | 0.5517 | 0.4483 | -0.2608 | 0.3688 |
| Marker63431 | Chr3 | 30997211 | 30997486 | 18 | 44 | 22 | 32 | 0.2903 | 0.7097 | 0.4074 | 0.5926 | 0.1171  | 0.1656 |
| Marker6364  | Chr3 | 31039835 | 31040099 | 9  | 9  | 5  | 13 | 0.5    | 0.5    | 0.2778 | 0.7222 | -0.2222 | 0.3142 |
| Marker33917 | Chr3 | 31180535 | 31180743 | 3  | 8  | 7  | 10 | 0.2727 | 0.7273 | 0.4118 | 0.5882 | 0.1391  | 0.1967 |
| Marker42621 | Chr3 | 31223013 | 31223365 | 18 | 11 | 21 | 12 | 0.6207 | 0.3793 | 0.6364 | 0.3636 | 0.0157  | 0.0222 |
| Marker39775 | Chr3 | 31243423 | 31243759 | 6  | 8  | 5  | 6  | 0.4286 | 0.5714 | 0.4545 | 0.5455 | 0.0259  | 0.0366 |
| Marker45723 | Chr3 | 31300307 | 31300601 | 47 | 56 | 55 | 32 | 0.4563 | 0.5437 | 0.6322 | 0.3678 | 0.1759  | 0.2488 |
| Marker24768 | Chr3 | 31316651 | 31316903 | 8  | 11 | 7  | 13 | 0.4211 | 0.5789 | 0.35   | 0.65   | -0.0711 | 0.1006 |
| Marker5934  | Chr3 | 31328033 | 31328311 | 22 | 37 | 26 | 21 | 0.3729 | 0.6271 | 0.5532 | 0.4468 | 0.1803  | 0.255  |
| Marker13988 | Chr3 | 31336035 | 31336382 | 14 | 17 | 13 | 18 | 0.4516 | 0.5484 | 0.4194 | 0.5806 | -0.0322 | 0.0455 |
| Marker25823 | Chr3 | 31339885 | 31340171 | 59 | 57 | 36 | 23 | 0.5086 | 0.4914 | 0.6102 | 0.3898 | 0.1016  | 0.1437 |
| Marker43931 | Chr3 | 31340473 | 31340783 | 49 | 70 | 88 | 71 | 0.4118 | 0.5882 | 0.5535 | 0.4465 | 0.1417  | 0.2004 |
| Marker8879  | Chr3 | 31347338 | 31347677 | 22 | 25 | 16 | 17 | 0.4681 | 0.5319 | 0.4848 | 0.5152 | 0.0167  | 0.0236 |
| Marker2070  | Chr3 | 31348045 | 31348346 | 27 | 28 | 27 | 32 | 0.4909 | 0.5091 | 0.4576 | 0.5424 | -0.0333 | 0.0471 |
| Marker58799 | Chr3 | 31360807 | 31361105 | 32 | 31 | 55 | 33 | 0.5079 | 0.4921 | 0.625  | 0.375  | 0.1171  | 0.1656 |
| Marker40298 | Chr3 | 31362309 | 31362621 | 57 | 35 | 53 | 61 | 0.6196 | 0.3804 | 0.4649 | 0.5351 | -0.1547 | 0.2188 |
| Marker35058 | Chr3 | 31364974 | 31365329 | 30 | 24 | 14 | 20 | 0.5556 | 0.4444 | 0.4118 | 0.5882 | -0.1438 | 0.2034 |
| Marker15065 | Chr3 | 31365659 | 31365928 | 51 | 57 | 51 | 36 | 0.4722 | 0.5278 | 0.5862 | 0.4138 | 0.114   | 0.1612 |
| Marker61932 | Chr3 | 31619679 | 31619988 | 28 | 25 | 17 | 22 | 0.5283 | 0.4717 | 0.4359 | 0.5641 | -0.0924 | 0.1307 |
| Marker7001  | Chr3 | 31638756 | 31639067 | 35 | 49 | 37 | 29 | 0.4167 | 0.5833 | 0.5606 | 0.4394 | 0.1439  | 0.2035 |
| Marker36208 | Chr3 | 31647149 | 31647426 | 20 | 34 | 22 | 28 | 0.3704 | 0.6296 | 0.44   | 0.56   | 0.0696  | 0.0984 |
| Marker8495  | Chr3 | 31655622 | 31655951 | 46 | 28 | 44 | 18 | 0.6216 | 0.3784 | 0.7097 | 0.2903 | 0.0881  | 0.1246 |
| Marker35188 | Chr3 | 31656123 | 31656469 | 25 | 22 | 12 | 14 | 0.5319 | 0.4681 | 0.4615 | 0.5385 | -0.0704 | 0.0996 |
| Marker60827 | Chr3 | 31660490 | 31660765 | 44 | 49 | 25 | 12 | 0.4731 | 0.5269 | 0.6757 | 0.3243 | 0.2026  | 0.2865 |
| Marker35651 | Chr3 | 32623160 | 32623407 | 10 | 19 | 22 | 19 | 0.3448 | 0.6552 | 0.5366 | 0.4634 | 0.1918  | 0.2712 |
| Marker33659 | Chr3 | 32711982 | 32712214 | 12 | 14 | 6  | 7  | 0.4615 | 0.5385 | 0.4615 | 0.5385 | 0       | 0      |
| Marker17762 | Chr3 | 32845596 | 32845848 | 7  | 5  | 3  | 2  | 0.5833 | 0.4167 | 0.6    | 0.4    | 0.0167  | 0.0236 |
| Marker48219 | Chr3 | 32846662 | 32847014 | 30 | 12 | 28 | 8  | 0.7143 | 0.2857 | 0.7778 | 0.2222 | 0.0635  | 0.0898 |
| Marker8023  | Chr3 | 32848620 | 32848839 | 10 | 7  | 8  | 7  | 0.5882 | 0.4118 | 0.5333 | 0.4667 | -0.0549 | 0.0776 |
| Marker10012 | Chr3 | 32855540 | 32855832 | 51 | 7  | 43 | 9  | 0.8793 | 0.1207 | 0.8269 | 0.1731 | -0.0524 | 0.0741 |
| Marker50671 | Chr3 | 32880544 | 32880850 | 49 | 12 | 39 | 10 | 0.8033 | 0.1967 | 0.7959 | 0.2041 | -0.0074 | 0.0105 |
| Marker5963  | Chr3 | 32881561 | 32881868 | 60 | 35 | 38 | 35 | 0.6316 | 0.3684 | 0.5205 | 0.4795 | -0.1111 | 0.1571 |
| Marker32854 | Chr3 | 33117841 | 33118145 | 38 | 34 | 26 | 28 | 0.5278 | 0.4722 | 0.4815 | 0.5185 | -0.0463 | 0.0655 |
| Marker56665 | Chr3 | 34311313 | 34311640 | 27 | 21 | 20 | 21 | 0.5625 | 0.4375 | 0.4878 | 0.5122 | -0.0747 | 0.1056 |

|              |      |          |          |     |     |     |     |        |        |        |        |         |        |
|--------------|------|----------|----------|-----|-----|-----|-----|--------|--------|--------|--------|---------|--------|
| Marker19089  | Chr3 | 34321141 | 34321398 | 31  | 22  | 21  | 29  | 0.5849 | 0.4151 | 0.42   | 0.58   | -0.1649 | 0.2332 |
| Marker22034  | Chr3 | 34322370 | 34322637 | 16  | 6   | 17  | 21  | 0.7273 | 0.2727 | 0.4474 | 0.5526 | -0.2799 | 0.3958 |
| Marker19117  | Chr3 | 34400578 | 34400850 | 74  | 51  | 40  | 44  | 0.592  | 0.408  | 0.4762 | 0.5238 | -0.1158 | 0.1638 |
| Marker15543  | Chr3 | 34402821 | 34403104 | 46  | 33  | 42  | 34  | 0.5823 | 0.4177 | 0.5526 | 0.4474 | -0.0297 | 0.042  |
| Markers31413 | Chr3 | 34406164 | 34406429 | 27  | 21  | 33  | 31  | 0.5625 | 0.4375 | 0.5156 | 0.4844 | -0.0469 | 0.0663 |
| Markers2752  | Chr3 | 34420257 | 34420588 | 50  | 44  | 29  | 47  | 0.5319 | 0.4681 | 0.3816 | 0.6184 | -0.1503 | 0.2126 |
| Marker31246  | Chr3 | 34429699 | 34429989 | 26  | 29  | 19  | 21  | 0.4727 | 0.5273 | 0.475  | 0.525  | 0.0023  | 0.0033 |
| Marker34326  | Chr3 | 34430203 | 34430475 | 28  | 26  | 16  | 25  | 0.5185 | 0.4815 | 0.3902 | 0.6098 | -0.1283 | 0.1814 |
| Marker561    | Chr3 | 35125013 | 35125324 | 22  | 17  | 9   | 7   | 0.5641 | 0.4359 | 0.5625 | 0.4375 | -0.0016 | 0.0023 |
| Marker20015  | Chr3 | 35261443 | 35261713 | 11  | 14  | 16  | 5   | 0.44   | 0.56   | 0.7619 | 0.2381 | 0.3219  | 0.4552 |
| Marker10073  | Chr3 | 35312823 | 35313176 | 27  | 15  | 13  | 8   | 0.6429 | 0.3571 | 0.619  | 0.381  | -0.0239 | 0.0338 |
| Marker31750  | Chr3 | 35322151 | 35322418 | 44  | 30  | 41  | 30  | 0.5946 | 0.4054 | 0.5775 | 0.4225 | -0.0171 | 0.0242 |
| Marker63889  | Chr3 | 35323409 | 35323678 | 39  | 32  | 46  | 30  | 0.5493 | 0.4507 | 0.6053 | 0.3947 | 0.056   | 0.0792 |
| Marker22293  | Chr3 | 35324100 | 35324364 | 33  | 10  | 18  | 9   | 0.7674 | 0.2326 | 0.6667 | 0.3333 | -0.1007 | 0.1424 |
| Markers7651  | Chr3 | 35661197 | 35661524 | 35  | 22  | 23  | 11  | 0.614  | 0.386  | 0.6765 | 0.3235 | 0.0625  | 0.0884 |
| Markers2442  | Chr3 | 35678589 | 35678828 | 19  | 6   | 13  | 9   | 0.76   | 0.24   | 0.5909 | 0.4091 | -0.1691 | 0.2391 |
| Marker50343  | Chr3 | 35687676 | 35687886 | 14  | 6   | 13  | 7   | 0.7    | 0.3    | 0.65   | 0.35   | -0.05   | 0.0707 |
| Marker35256  | Chr3 | 35706472 | 35706797 | 72  | 29  | 73  | 41  | 0.7129 | 0.2871 | 0.6404 | 0.3596 | -0.0725 | 0.1025 |
| Marker50509  | Chr3 | 35719673 | 35719996 | 48  | 30  | 40  | 18  | 0.6154 | 0.3846 | 0.6897 | 0.3103 | 0.0743  | 0.1051 |
| Marker11081  | Chr3 | 35719999 | 35720261 | 49  | 28  | 33  | 11  | 0.6364 | 0.3636 | 0.75   | 0.25   | 0.1136  | 0.1607 |
| Marker18851  | Chr3 | 35728096 | 35728362 | 25  | 10  | 28  | 9   | 0.7143 | 0.2857 | 0.7568 | 0.2432 | 0.0425  | 0.0601 |
| Marker48793  | Chr3 | 35734004 | 35734288 | 95  | 44  | 67  | 27  | 0.6835 | 0.3165 | 0.7128 | 0.2872 | 0.0293  | 0.0414 |
| Marker12570  | Chr3 | 35786134 | 35786387 | 12  | 8   | 11  | 8   | 0.6    | 0.4    | 0.5789 | 0.4211 | -0.0211 | 0.0298 |
| Marker33237  | Chr3 | 35787292 | 35787582 | 94  | 43  | 125 | 39  | 0.6861 | 0.3139 | 0.7622 | 0.2378 | 0.0761  | 0.1076 |
| Marker7542   | Chr3 | 35817810 | 35818082 | 39  | 20  | 26  | 15  | 0.661  | 0.339  | 0.6341 | 0.3659 | -0.0269 | 0.038  |
| Marker2424   | Chr3 | 35845346 | 35845627 | 50  | 23  | 45  | 30  | 0.6849 | 0.3151 | 0.6    | 0.4    | -0.0849 | 0.1201 |
| Marker31816  | Chr3 | 35848581 | 35848904 | 59  | 42  | 60  | 33  | 0.5842 | 0.4158 | 0.6452 | 0.3548 | 0.061   | 0.0863 |
| Marker30575  | Chr3 | 35901390 | 35901590 | 11  | 5   | 6   | 2   | 0.6875 | 0.3125 | 0.75   | 0.25   | 0.0625  | 0.0884 |
| Marker54693  | Chr3 | 36095952 | 36096286 | 88  | 45  | 84  | 58  | 0.6617 | 0.3383 | 0.5915 | 0.4085 | -0.0702 | 0.0993 |
| Marker26197  | Chr3 | 36115559 | 36115828 | 127 | 54  | 127 | 90  | 0.7017 | 0.2983 | 0.5853 | 0.4147 | -0.1164 | 0.1646 |
| Marker25632  | Chr3 | 36355282 | 36355650 | 9   | 9   | 3   | 1   | 0.5    | 0.5    | 0.75   | 0.25   | 0.25    | 0.3536 |
| Marker22325  | Chr3 | 36604319 | 36604622 | 62  | 24  | 26  | 35  | 0.7209 | 0.2791 | 0.4262 | 0.5738 | -0.2947 | 0.4168 |
| Marker18232  | Chr3 | 36606083 | 36606430 | 55  | 22  | 20  | 23  | 0.7143 | 0.2857 | 0.4651 | 0.5349 | -0.2492 | 0.3524 |
| Marker58748  | Chr3 | 36606433 | 36606779 | 29  | 26  | 22  | 20  | 0.5273 | 0.4727 | 0.5238 | 0.4762 | -0.0035 | 0.0049 |
| Marker57418  | Chr3 | 37103979 | 37104322 | 7   | 8   | 11  | 4   | 0.4667 | 0.5333 | 0.7333 | 0.2667 | 0.2666  | 0.377  |
| Marker34711  | Chr3 | 37150801 | 37151141 | 40  | 28  | 22  | 21  | 0.5882 | 0.4118 | 0.5116 | 0.4884 | -0.0766 | 0.1083 |
| Marker55872  | Chr3 | 37163286 | 37163571 | 89  | 57  | 39  | 57  | 0.6096 | 0.3904 | 0.4062 | 0.5938 | -0.2034 | 0.2877 |
| Marker30798  | Chr3 | 37169275 | 37169597 | 46  | 19  | 20  | 21  | 0.7077 | 0.2923 | 0.4878 | 0.5122 | -0.2199 | 0.311  |
| Marker61663  | Chr3 | 37200259 | 37200505 | 20  | 4   | 14  | 10  | 0.8333 | 0.1667 | 0.5833 | 0.4167 | -0.25   | 0.3536 |
| Marker48898  | Chr3 | 37550780 | 37551055 | 81  | 40  | 45  | 29  | 0.6694 | 0.3306 | 0.6081 | 0.3919 | -0.0613 | 0.0867 |
| Markers2078  | Chr3 | 37657965 | 37658271 | 102 | 61  | 79  | 26  | 0.6258 | 0.3742 | 0.7524 | 0.2476 | 0.1266  | 0.179  |
| Marker19693  | Chr3 | 37660485 | 37660741 | 10  | 3   | 18  | 10  | 0.7692 | 0.2308 | 0.6429 | 0.3571 | -0.1263 | 0.1786 |
| Marker7325   | Chr3 | 37775629 | 37775927 | 24  | 13  | 17  | 11  | 0.6486 | 0.3514 | 0.6071 | 0.3929 | -0.0415 | 0.0587 |
| Marker7138   | Chr3 | 37861822 | 37862052 | 5   | 2   | 10  | 3   | 0.7143 | 0.2857 | 0.7692 | 0.2308 | 0.0549  | 0.0776 |
| Marker1668   | Chr3 | 37869860 | 37870111 | 17  | 1   | 10  | 5   | 0.9444 | 0.0556 | 0.6667 | 0.3333 | -0.2777 | 0.3927 |
| Markers6216  | Chr3 | 38008593 | 38008849 | 18  | 18  | 20  | 27  | 0.5    | 0.5    | 0.4255 | 0.5745 | -0.0745 | 0.1054 |
| Marker6824   | Chr3 | 38556446 | 38556790 | 24  | 7   | 22  | 7   | 0.7742 | 0.2258 | 0.7586 | 0.2414 | -0.0156 | 0.0221 |
| Marker26206  | Chr3 | 38581598 | 38581852 | 11  | 7   | 14  | 3   | 0.6111 | 0.3889 | 0.8235 | 0.1765 | 0.2124  | 0.3004 |
| Marker35323  | Chr3 | 38708250 | 38708537 | 43  | 9   | 28  | 15  | 0.8269 | 0.1731 | 0.6512 | 0.3488 | -0.1757 | 0.2485 |
| Marker51206  | Chr3 | 38937235 | 38937497 | 35  | 3   | 15  | 12  | 0.9211 | 0.0789 | 0.5556 | 0.4444 | -0.3655 | 0.5169 |
| Marker48963  | Chr3 | 39019865 | 39020221 | 25  | 6   | 17  | 13  | 0.8065 | 0.1935 | 0.5667 | 0.4333 | -0.2398 | 0.3391 |
| Marker37947  | Chr3 | 39217035 | 39217286 | 15  | 7   | 14  | 17  | 0.6818 | 0.3182 | 0.4516 | 0.5484 | -0.2302 | 0.3256 |
| Marker799    | Chr3 | 39218106 | 39218363 | 12  | 8   | 12  | 2   | 0.6    | 0.4    | 0.8571 | 0.1429 | 0.2571  | 0.3636 |
| Marker16242  | Chr3 | 39219625 | 39219904 | 32  | 23  | 23  | 12  | 0.5818 | 0.4182 | 0.6571 | 0.3429 | 0.0753  | 0.1065 |
| Marker61834  | Chr3 | 39391116 | 39391393 | 106 | 51  | 77  | 68  | 0.6752 | 0.3248 | 0.531  | 0.469  | -0.1442 | 0.2039 |
| Marker36439  | Chr3 | 39467940 | 39468262 | 49  | 26  | 30  | 14  | 0.6533 | 0.3467 | 0.6818 | 0.3182 | 0.0285  | 0.0403 |
| Marker49005  | Chr3 | 39748818 | 39749169 | 13  | 13  | 9   | 10  | 0.5    | 0.5    | 0.4737 | 0.5263 | -0.0263 | 0.0372 |
| Marker45798  | Chr3 | 39751748 | 39751984 | 10  | 5   | 4   | 5   | 0.6667 | 0.3333 | 0.4444 | 0.5556 | -0.2223 | 0.3144 |
| Markers62059 | Chr3 | 39781762 | 39782408 | 16  | 20  | 9   | 20  | 0.4444 | 0.5556 | 0.3103 | 0.6897 | -0.1341 | 0.1896 |
| Marker309800 | Chr4 | 1250404  | 1250678  | 100 | 21  | 75  | 4   | 0.8264 | 0.1736 | 0.9494 | 0.0506 | 0.123   | 0.1739 |
| Marker285288 | Chr4 | 1909163  | 1909470  | 13  | 40  | 32  | 38  | 0.2453 | 0.7547 | 0.4571 | 0.5429 | 0.2118  | 0.2995 |
| Marker281526 | Chr4 | 3686097  | 3686371  | 26  | 44  | 21  | 39  | 0.3714 | 0.6286 | 0.35   | 0.65   | -0.0214 | 0.0303 |
| Marker296744 | Chr4 | 4234277  | 4234586  | 69  | 0   | 60  | 1   | 1      | 0      | 0.9836 | 0.0164 | -0.0164 | 0.0232 |
| Marker284768 | Chr4 | 4378309  | 4378580  | 51  | 0   | 50  | 5   | 1      | 0      | 0.9091 | 0.0909 | -0.0909 | 0.1286 |
| Marker318258 | Chr4 | 4422085  | 4422362  | 128 | 0   | 100 | 16  | 1      | 0      | 0.8621 | 0.1379 | -0.1379 | 0.195  |
| Marker288302 | Chr4 | 4441039  | 4441296  | 19  | 0   | 6   | 3   | 1      | 0      | 0.6667 | 0.3333 | -0.3333 | 0.4714 |
| Marker303847 | Chr4 | 4585151  | 4585464  | 13  | 21  | 8   | 10  | 0.3824 | 0.6176 | 0.4444 | 0.5556 | 0.062   | 0.0877 |
| Marker285776 | Chr4 | 4593433  | 4593737  | 50  | 13  | 41  | 5   | 0.7937 | 0.2063 | 0.8913 | 0.1087 | 0.0976  | 0.138  |
| Marker294064 | Chr4 | 4595290  | 4595593  | 24  | 55  | 29  | 26  | 0.3038 | 0.6962 | 0.5273 | 0.4727 | 0.2235  | 0.3161 |
| Marker283815 | Chr4 | 4988428  | 4988754  | 72  | 124 | 138 | 128 | 0.3673 | 0.6327 | 0.5188 | 0.4812 | 0.1515  | 0.2143 |
| Marker303987 | Chr4 | 5266270  | 5266540  | 16  | 24  | 11  | 18  | 0.4    | 0.6    | 0.3793 | 0.6207 | -0.0207 | 0.0293 |
| Marker317160 | Chr4 | 6298598  | 6298958  | 8   | 10  | 5   | 4   | 0.4444 | 0.5556 | 0.5556 | 0.4444 | 0.1112  | 0.1573 |
| Marker298208 | Chr4 | 6489879  | 6490122  | 29  | 2   | 27  | 2   | 0.9355 | 0.0645 | 0.931  | 0.069  | -0.0045 | 0.0064 |
| Marker309543 | Chr4 | 6513312  | 6513577  | 28  | 4   | 24  | 2   | 0.875  | 0.125  | 0.9231 | 0.0769 | 0.0481  | 0.068  |
| Marker313822 | Chr4 | 6515430  | 6515687  | 41  | 0   | 25  | 3   | 1      | 0      | 0.8929 | 0.1071 | -0.1071 | 0.1515 |
| Marker302292 | Chr4 | 6516652  | 6516905  | 18  | 4   | 15  | 3   | 0.8182 | 0.1818 | 0.8333 | 0.1667 | 0.0151  | 0.0214 |
| Marker309860 | Chr4 | 6698477  | 6698753  | 63  | 0   | 61  | 5   | 1      | 0      | 0.9242 | 0.0758 | -0.0758 | 0.1072 |
| Marker286772 | Chr4 | 6822537  | 6822901  | 10  | 6   | 9   | 12  | 0.625  | 0.375  | 0.4286 | 0.5714 | -0.1964 | 0.2778 |
| Marker302204 | Chr4 | 6839944  | 6840289  | 20  | 38  | 16  | 5   | 0.3448 | 0.6552 | 0.7619 | 0.2381 | -0.4171 | 0.5899 |
| Marker281886 | Chr4 | 7093723  | 7093984  | 22  | 15  | 7   | 1   | 0.5946 | 0.4054 | 0.875  | 0.125  | 0.2804  | 0.3965 |
| Marker310524 | Chr4 | 7096478  | 7096827  | 37  | 70  | 34  | 49  | 0.3458 | 0.6542 | 0.4096 | 0.5904 | 0.0638  | 0.0902 |
| Marker286489 | Chr4 | 7098396  | 7098621  | 4   | 14  | 15  | 11  | 0.2222 | 0.7778 | 0.5769 | 0.4231 | 0.3547  | 0.5016 |



|              |      |          |          |     |     |     |     |        |        |        |        |         |        |
|--------------|------|----------|----------|-----|-----|-----|-----|--------|--------|--------|--------|---------|--------|
| Marker308384 | Chr4 | 7600952  | 7601248  | 46  | 68  | 59  | 54  | 0.4035 | 0.5965 | 0.5221 | 0.4779 | 0.1186  | 0.1677 |
| Marker292210 | Chr4 | 7605230  | 7605531  | 57  | 76  | 71  | 60  | 0.4286 | 0.5714 | 0.542  | 0.458  | 0.1134  | 0.1604 |
| Marker287797 | Chr4 | 7608573  | 7608897  | 30  | 21  | 14  | 25  | 0.5882 | 0.4118 | 0.359  | 0.641  | -0.2292 | 0.3241 |
| Marker287183 | Chr4 | 7610732  | 7611008  | 68  | 79  | 55  | 48  | 0.4626 | 0.5374 | 0.534  | 0.466  | 0.0714  | 0.101  |
| Marker288172 | Chr4 | 7627856  | 7628123  | 2   | 7   | 6   | 7   | 0.2222 | 0.7778 | 0.4615 | 0.5385 | 0.2393  | 0.3384 |
| Marker304958 | Chr4 | 7892390  | 7892747  | 10  | 12  | 7   | 7   | 0.4545 | 0.5455 | 0.5    | 0.5    | 0.0455  | 0.0643 |
| Marker316228 | Chr4 | 7895234  | 7895597  | 7   | 12  | 12  | 7   | 0.3684 | 0.6316 | 0.6316 | 0.3684 | 0.2632  | 0.3722 |
| Marker283033 | Chr4 | 8005912  | 8006220  | 46  | 59  | 57  | 76  | 0.4381 | 0.5619 | 0.4286 | 0.5714 | -0.0095 | 0.0134 |
| Marker293850 | Chr4 | 8010193  | 8010565  | 9   | 9   | 10  | 18  | 0.5    | 0.5    | 0.3571 | 0.6429 | -0.1429 | 0.2021 |
| Marker281169 | Chr4 | 8029301  | 8029570  | 21  | 32  | 18  | 35  | 0.3962 | 0.6038 | 0.3396 | 0.6604 | -0.0566 | 0.08   |
| Marker312361 | Chr4 | 8050706  | 8050967  | 15  | 12  | 17  | 9   | 0.5556 | 0.4444 | 0.6538 | 0.3462 | 0.0982  | 0.1389 |
| Marker310490 | Chr4 | 8050970  | 8051258  | 54  | 51  | 30  | 37  | 0.5143 | 0.4857 | 0.4478 | 0.5522 | -0.0665 | 0.094  |
| Marker297045 | Chr4 | 8051802  | 8052070  | 13  | 20  | 11  | 19  | 0.3939 | 0.6061 | 0.3667 | 0.6333 | -0.0272 | 0.0385 |
| Marker304908 | Chr4 | 8362803  | 8363121  | 19  | 26  | 15  | 11  | 0.4222 | 0.5778 | 0.5769 | 0.4231 | 0.1547  | 0.2188 |
| Marker306531 | Chr4 | 8418922  | 8419217  | 42  | 56  | 21  | 49  | 0.4286 | 0.5714 | 0.3    | 0.7    | -0.1286 | 0.1819 |
| Marker311662 | Chr4 | 8654352  | 8654681  | 38  | 34  | 25  | 29  | 0.5278 | 0.4722 | 0.4648 | 0.537  | -0.0648 | 0.0916 |
| Marker284422 | Chr4 | 9230797  | 9231063  | 8   | 9   | 6   | 16  | 0.4706 | 0.5294 | 0.2727 | 0.7273 | -0.1979 | 0.2799 |
| Marker304917 | Chr4 | 9231092  | 9231427  | 31  | 40  | 20  | 36  | 0.4366 | 0.5634 | 0.3571 | 0.6429 | -0.0795 | 0.1124 |
| Marker310722 | Chr4 | 9237378  | 9237732  | 37  | 35  | 21  | 25  | 0.5139 | 0.4861 | 0.4565 | 0.5435 | -0.0574 | 0.0812 |
| Marker306738 | Chr4 | 9240887  | 9241181  | 38  | 75  | 42  | 58  | 0.3363 | 0.6637 | 0.42   | 0.58   | 0.0837  | 0.1184 |
| Marker293889 | Chr4 | 9262962  | 9263252  | 15  | 8   | 4   | 3   | 0.6522 | 0.3478 | 0.5714 | 0.4286 | -0.0808 | 0.1143 |
| Marker288603 | Chr4 | 9390456  | 9390731  | 39  | 40  | 19  | 30  | 0.4937 | 0.5063 | 0.3878 | 0.6122 | -0.1059 | 0.1498 |
| Marker295361 | Chr4 | 9871225  | 9871584  | 27  | 16  | 35  | 27  | 0.6279 | 0.3721 | 0.5645 | 0.4355 | -0.0634 | 0.0897 |
| Marker290823 | Chr4 | 9873994  | 9874318  | 61  | 61  | 37  | 23  | 0.5    | 0.5    | 0.6167 | 0.3833 | 0.1167  | 0.165  |
| Marker314423 | Chr4 | 9876464  | 9876723  | 14  | 18  | 17  | 10  | 0.4375 | 0.5625 | 0.6296 | 0.3704 | 0.1921  | 0.2717 |
| Marker288021 | Chr4 | 9889533  | 9889779  | 6   | 10  | 3   | 3   | 0.375  | 0.625  | 0.5    | 0.5    | 0.125   | 0.1768 |
| Marker294758 | Chr4 | 9894216  | 9894525  | 37  | 80  | 58  | 53  | 0.3162 | 0.6838 | 0.5225 | 0.4775 | 0.2063  | 0.2918 |
| Marker280936 | Chr4 | 10015311 | 10015612 | 42  | 41  | 22  | 21  | 0.506  | 0.494  | 0.5116 | 0.4884 | 0.0056  | 0.0079 |
| Marker300506 | Chr4 | 10020743 | 10021072 | 123 | 79  | 116 | 103 | 0.6089 | 0.3911 | 0.5297 | 0.4703 | -0.0792 | 0.112  |
| Marker306120 | Chr4 | 10030563 | 10030896 | 20  | 29  | 16  | 15  | 0.4082 | 0.5918 | 0.5161 | 0.4839 | 0.1079  | 0.1526 |
| Marker284558 | Chr4 | 10042987 | 10043264 | 49  | 37  | 51  | 20  | 0.5698 | 0.4302 | 0.7183 | 0.2817 | 0.1485  | 0.21   |
| Marker293548 | Chr4 | 10083999 | 10084308 | 27  | 20  | 16  | 15  | 0.5745 | 0.4255 | 0.5161 | 0.4839 | -0.0584 | 0.0826 |
| Marker283291 | Chr4 | 10187348 | 10187436 | 6   | 11  | 7   | 5   | 0.3529 | 0.6471 | 0.5833 | 0.4167 | 0.2304  | 0.3258 |
| Marker318528 | Chr4 | 10777586 | 10777877 | 64  | 102 | 53  | 76  | 0.3855 | 0.6145 | 0.4109 | 0.5891 | 0.0254  | 0.0359 |
| Marker282359 | Chr4 | 10845391 | 10845660 | 29  | 5   | 21  | 1   | 0.8529 | 0.1471 | 0.9545 | 0.0455 | 0.1016  | 0.1437 |
| Marker287544 | Chr4 | 10846250 | 10846813 | 31  | 23  | 23  | 25  | 0.5741 | 0.4259 | 0.4792 | 0.5208 | -0.0949 | 0.1342 |
| Marker281471 | Chr4 | 10848568 | 10848855 | 43  | 43  | 27  | 32  | 0.5    | 0.5    | 0.4576 | 0.5424 | -0.0424 | 0.06   |
| Marker282532 | Chr4 | 10931845 | 10932134 | 47  | 51  | 18  | 39  | 0.4796 | 0.5204 | 0.3158 | 0.6842 | -0.1638 | 0.2316 |
| Marker317963 | Chr4 | 10944020 | 10944354 | 26  | 31  | 20  | 28  | 0.4561 | 0.5439 | 0.4167 | 0.5833 | -0.0394 | 0.0557 |
| Marker316354 | Chr4 | 10957981 | 10958348 | 11  | 12  | 10  | 13  | 0.4783 | 0.5217 | 0.4348 | 0.5652 | -0.0435 | 0.0615 |
| Marker303451 | Chr4 | 11005041 | 11005412 | 8   | 7   | 2   | 7   | 0.5333 | 0.4667 | 0.2222 | 0.7778 | -0.3111 | 0.44   |
| Marker300948 | Chr4 | 11020511 | 11020842 | 34  | 54  | 30  | 30  | 0.3864 | 0.6136 | 0.5    | 0.5    | 0.1136  | 0.1607 |
| Marker312098 | Chr4 | 11020845 | 11021136 | 69  | 107 | 99  | 105 | 0.392  | 0.608  | 0.4853 | 0.5147 | 0.0933  | 0.1319 |
| Marker295308 | Chr4 | 11064789 | 11065112 | 42  | 8   | 16  | 10  | 0.84   | 0.16   | 0.6154 | 0.3846 | -0.2246 | 0.3176 |
| Marker299918 | Chr4 | 11435002 | 11435317 | 36  | 8   | 29  | 2   | 0.8182 | 0.1818 | 0.9355 | 0.0645 | 0.1173  | 0.1659 |
| Marker302053 | Chr4 | 11537713 | 11538015 | 36  | 24  | 40  | 31  | 0.6    | 0.4    | 0.5634 | 0.4366 | -0.0366 | 0.0518 |
| Marker302366 | Chr4 | 11607364 | 11607623 | 22  | 3   | 14  | 2   | 0.88   | 0.12   | 0.875  | 0.125  | -0.005  | 0.0071 |
| Marker296786 | Chr4 | 11678404 | 11678703 | 34  | 44  | 19  | 25  | 0.4359 | 0.5641 | 0.4318 | 0.5682 | -0.0041 | 0.0058 |
| Marker311629 | Chr4 | 11678706 | 11679025 | 24  | 31  | 11  | 22  | 0.4364 | 0.5636 | 0.3333 | 0.6667 | -0.1031 | 0.1458 |
| Marker304440 | Chr4 | 11857458 | 11857752 | 60  | 88  | 74  | 67  | 0.4054 | 0.5946 | 0.5248 | 0.4752 | 0.1194  | 0.1689 |
| Marker287835 | Chr4 | 11861893 | 11862186 | 24  | 40  | 46  | 24  | 0.375  | 0.625  | 0.6571 | 0.3429 | 0.2821  | 0.3989 |
| Marker293076 | Chr4 | 11862189 | 11862497 | 36  | 34  | 42  | 24  | 0.5143 | 0.4857 | 0.6364 | 0.3636 | 0.1221  | 0.1727 |
| Marker305185 | Chr4 | 11873026 | 11873307 | 68  | 74  | 67  | 60  | 0.4789 | 0.5211 | 0.5276 | 0.4724 | 0.0487  | 0.0689 |
| Marker303664 | Chr4 | 11888564 | 11888897 | 4   | 6   | 9   | 3   | 0.4    | 0.6    | 0.75   | 0.25   | 0.35    | 0.495  |
| Marker306275 | Chr4 | 11951590 | 11951920 | 18  | 28  | 19  | 13  | 0.3913 | 0.6087 | 0.5938 | 0.4062 | 0.2025  | 0.2864 |
| Marker292168 | Chr4 | 11966904 | 11967231 | 25  | 27  | 18  | 20  | 0.4808 | 0.5192 | 0.4737 | 0.5263 | -0.0071 | 0.01   |
| Marker302341 | Chr4 | 12022445 | 12022726 | 45  | 47  | 64  | 37  | 0.4891 | 0.5109 | 0.6337 | 0.3663 | 0.1446  | 0.2045 |
| Marker294457 | Chr4 | 12032567 | 12032797 | 11  | 13  | 19  | 10  | 0.4583 | 0.5417 | 0.6552 | 0.3448 | 0.1969  | 0.2785 |
| Marker293520 | Chr4 | 12128354 | 12128682 | 26  | 35  | 26  | 22  | 0.4262 | 0.5738 | 0.5417 | 0.4583 | 0.1155  | 0.1633 |
| Marker310821 | Chr4 | 12429483 | 12429749 | 42  | 42  | 38  | 26  | 0.5    | 0.5    | 0.5938 | 0.4062 | 0.0938  | 0.1327 |
| Marker284039 | Chr4 | 12431451 | 12431805 | 27  | 40  | 25  | 24  | 0.403  | 0.597  | 0.5102 | 0.4898 | 0.1072  | 0.1516 |
| Marker302826 | Chr4 | 12432888 | 12433203 | 21  | 22  | 33  | 16  | 0.4884 | 0.5116 | 0.6735 | 0.3265 | 0.1851  | 0.2618 |
| Marker292464 | Chr4 | 12439344 | 12439597 | 13  | 9   | 2   | 3   | 0.5909 | 0.4091 | 0.4    | 0.6    | -0.1909 | 0.27   |
| Marker302745 | Chr4 | 12441903 | 12442163 | 3   | 5   | 8   | 7   | 0.375  | 0.625  | 0.5333 | 0.4667 | 0.1583  | 0.2239 |
| Marker298698 | Chr4 | 12442166 | 12442448 | 51  | 49  | 61  | 40  | 0.51   | 0.49   | 0.604  | 0.396  | 0.094   | 0.1329 |
| Marker292574 | Chr4 | 12442451 | 12442719 | 45  | 45  | 23  | 56  | 0.5    | 0.5    | 0.2911 | 0.7089 | -0.2089 | 0.2954 |
| Marker311204 | Chr4 | 12443226 | 12443455 | 3   | 3   | 3   | 4   | 0.5    | 0.5    | 0.4286 | 0.5714 | -0.0714 | 0.101  |
| Marker302673 | Chr4 | 12452015 | 12452263 | 6   | 9   | 10  | 6   | 0.4    | 0.6    | 0.625  | 0.375  | 0.225   | 0.3182 |
| Marker296649 | Chr4 | 12468487 | 12468816 | 48  | 49  | 30  | 25  | 0.4948 | 0.5052 | 0.5455 | 0.4545 | 0.0507  | 0.0717 |
| Marker305735 | Chr4 | 12469099 | 12469390 | 51  | 76  | 56  | 56  | 0.4016 | 0.5984 | 0.5    | 0.5    | 0.0984  | 0.1392 |
| Marker287921 | Chr4 | 12470582 | 12470871 | 23  | 22  | 24  | 13  | 0.5111 | 0.4889 | 0.6486 | 0.3514 | 0.1375  | 0.1945 |
| Marker305788 | Chr4 | 12471346 | 12471659 | 28  | 22  | 17  | 9   | 0.56   | 0.44   | 0.6538 | 0.3462 | 0.0938  | 0.1327 |
| Marker282962 | Chr4 | 12489988 | 12490329 | 23  | 40  | 30  | 27  | 0.3651 | 0.6349 | 0.5263 | 0.4737 | 0.1612  | 0.228  |
| Marker313989 | Chr4 | 12717229 | 12717560 | 27  | 39  | 27  | 43  | 0.4091 | 0.5909 | 0.3857 | 0.6143 | -0.0234 | 0.0331 |
| Marker306661 | Chr4 | 12717801 | 12718085 | 12  | 9   | 7   | 13  | 0.5714 | 0.4286 | 0.35   | 0.65   | -0.2214 | 0.3131 |
| Marker290238 | Chr4 | 12719809 | 12720131 | 28  | 35  | 27  | 17  | 0.4444 | 0.5556 | 0.6136 | 0.3864 | 0.1692  | 0.2393 |
| Marker288039 | Chr4 | 12741405 | 12741724 | 35  | 46  | 55  | 26  | 0.4321 | 0.5679 | 0.679  | 0.321  | 0.2469  | 0.3492 |
| Marker306792 | Chr4 | 12816682 | 12817030 | 52  | 15  | 32  | 13  | 0.7761 | 0.2239 | 0.7111 | 0.2889 | -0.065  | 0.0919 |
| Marker298586 | Chr4 | 13231472 | 13231774 | 16  | 5   | 8   | 8   | 0.7619 | 0.2381 | 0.5    | 0.5    | -0.2619 | 0.3704 |
| Marker296281 | Chr4 | 13248011 | 13248318 | 59  | 47  | 52  | 54  | 0.5566 | 0.4434 | 0.4906 | 0.5094 | -0.066  | 0.0933 |
| Marker288726 | Chr4 | 13402726 | 13403017 | 25  | 37  | 20  | 19  | 0.4032 | 0.5968 | 0.5128 | 0.4872 | 0.1096  | 0.155  |
| Marker292932 | Chr4 | 13418338 | 13418604 | 13  | 4   | 11  | 7   | 0.7647 | 0.2353 | 0.6111 | 0.3889 | -0.1536 | 0.2172 |

|              |      |          |          |     |     |     |     |        |        |        |        |         |        |
|--------------|------|----------|----------|-----|-----|-----|-----|--------|--------|--------|--------|---------|--------|
| Marker311934 | Chr4 | 13438676 | 13438954 | 102 | 90  | 132 | 53  | 0.5312 | 0.4688 | 0.7135 | 0.2865 | 0.1823  | 0.2578 |
| Marker280645 | Chr4 | 13441241 | 13441518 | 32  | 14  | 21  | 6   | 0.6957 | 0.3043 | 0.7778 | 0.2222 | 0.0821  | 0.1161 |
| Marker311349 | Chr4 | 13515758 | 13516031 | 21  | 12  | 8   | 7   | 0.6364 | 0.3636 | 0.5333 | 0.4667 | -0.1031 | 0.1458 |
| Marker284890 | Chr4 | 13544175 | 13544534 | 21  | 16  | 24  | 2   | 0.5676 | 0.4324 | 0.9231 | 0.0769 | 0.3555  | 0.5028 |
| Marker298685 | Chr4 | 13548106 | 13548382 | 36  | 24  | 18  | 6   | 0.6    | 0.4    | 0.75   | 0.25   | 0.15    | 0.2121 |
| Marker299747 | Chr4 | 13554039 | 13554328 | 79  | 76  | 42  | 67  | 0.5097 | 0.4903 | 0.3853 | 0.6147 | -0.1244 | 0.1759 |
| Marker293422 | Chr4 | 13572011 | 13572310 | 162 | 134 | 158 | 152 | 0.5473 | 0.4527 | 0.5097 | 0.4903 | -0.0376 | 0.0532 |
| Marker304403 | Chr4 | 13579565 | 13579834 | 25  | 66  | 29  | 64  | 0.2747 | 0.7253 | 0.3118 | 0.6882 | 0.0371  | 0.0525 |
| Marker282578 | Chr4 | 13582971 | 13583188 | 11  | 11  | 18  | 12  | 0.5    | 0.5    | 0.6    | 0.4    | 0.1     | 0.1414 |
| Marker299138 | Chr4 | 13583191 | 13583477 | 45  | 36  | 55  | 53  | 0.5556 | 0.4444 | 0.5093 | 0.4907 | -0.0463 | 0.0655 |
| Marker301198 | Chr4 | 13611213 | 13611483 | 56  | 40  | 49  | 7   | 0.5833 | 0.4167 | 0.875  | 0.125  | 0.2917  | 0.4125 |
| Marker281454 | Chr4 | 13776868 | 13777205 | 23  | 18  | 17  | 12  | 0.561  | 0.439  | 0.5862 | 0.4138 | 0.0252  | 0.0356 |
| Marker295158 | Chr4 | 13795976 | 13796239 | 37  | 16  | 14  | 7   | 0.6981 | 0.3019 | 0.6667 | 0.3333 | -0.0314 | 0.0444 |
| Marker294944 | Chr4 | 13800452 | 13800817 | 21  | 4   | 26  | 11  | 0.84   | 0.16   | 0.7027 | 0.2973 | -0.1373 | 0.1942 |
| Marker303694 | Chr4 | 13818007 | 13818183 | 10  | 7   | 7   | 3   | 0.5882 | 0.4118 | 0.7    | 0.3    | 0.1118  | 0.1581 |
| Marker306479 | Chr4 | 13828649 | 13829013 | 14  | 6   | 9   | 4   | 0.7    | 0.3    | 0.6923 | 0.3077 | -0.0077 | 0.0109 |
| Marker287228 | Chr4 | 13830654 | 13830910 | 16  | 11  | 11  | 6   | 0.5926 | 0.4074 | 0.6471 | 0.3529 | 0.0545  | 0.0771 |
| Marker289812 | Chr4 | 13844146 | 13844437 | 18  | 1   | 18  | 8   | 0.9474 | 0.0526 | 0.6923 | 0.3077 | -0.2551 | 0.3608 |
| Marker311527 | Chr4 | 14001383 | 14001716 | 32  | 12  | 24  | 11  | 0.7273 | 0.2727 | 0.6857 | 0.3143 | -0.0416 | 0.0588 |
| Marker304515 | Chr4 | 14019769 | 14020032 | 53  | 21  | 38  | 20  | 0.7162 | 0.2838 | 0.6552 | 0.3448 | -0.061  | 0.0863 |
| Marker318375 | Chr4 | 14157556 | 14157814 | 20  | 8   | 18  | 7   | 0.7143 | 0.2857 | 0.72   | 0.28   | 0.0057  | 0.0081 |
| Marker291022 | Chr4 | 14777908 | 14778225 | 27  | 22  | 32  | 26  | 0.551  | 0.449  | 0.5517 | 0.4483 | 0.0007  | 0.001  |
| Marker308768 | Chr4 | 14782380 | 14782676 | 49  | 41  | 24  | 25  | 0.5444 | 0.4556 | 0.4898 | 0.5102 | -0.0546 | 0.0772 |
| Marker306535 | Chr4 | 14801490 | 14801760 | 36  | 33  | 17  | 17  | 0.5217 | 0.4783 | 0.5    | 0.5    | -0.0217 | 0.0307 |
| Marker309209 | Chr4 | 14801820 | 14802125 | 26  | 38  | 20  | 21  | 0.4062 | 0.5938 | 0.4878 | 0.5122 | 0.0816  | 0.1154 |
| Marker312757 | Chr4 | 14872942 | 14873261 | 27  | 24  | 13  | 3   | 0.5294 | 0.4706 | 0.8125 | 0.1875 | 0.2831  | 0.4004 |
| Marker284918 | Chr4 | 15070186 | 15070532 | 39  | 31  | 27  | 27  | 0.5571 | 0.4429 | 0.5    | 0.5    | -0.0571 | 0.0808 |
| Marker292537 | Chr4 | 15388334 | 15388587 | 7   | 3   | 7   | 5   | 0.7    | 0.3    | 0.5833 | 0.4167 | -0.1167 | 0.165  |
| Marker284083 | Chr4 | 15398243 | 15398546 | 10  | 8   | 11  | 6   | 0.5556 | 0.4444 | 0.6471 | 0.3529 | 0.0915  | 0.1294 |
| Marker312895 | Chr4 | 15436566 | 15436895 | 41  | 38  | 15  | 34  | 0.519  | 0.481  | 0.3061 | 0.6939 | -0.2129 | 0.3011 |
| Marker310072 | Chr4 | 16500092 | 16500389 | 90  | 22  | 85  | 8   | 0.8036 | 0.1964 | 0.914  | 0.086  | 0.1104  | 0.1561 |
| Marker312944 | Chr4 | 16953236 | 16953553 | 12  | 19  | 2   | 9   | 0.3871 | 0.6129 | 0.1818 | 0.8182 | -0.2053 | 0.2903 |
| Marker288345 | Chr4 | 17409208 | 17409569 | 9   | 18  | 6   | 17  | 0.3333 | 0.6667 | 0.2609 | 0.7391 | -0.0724 | 0.1024 |
| Marker300377 | Chr4 | 17438450 | 17438719 | 82  | 4   | 78  | 15  | 0.9535 | 0.0465 | 0.8387 | 0.1613 | -0.1148 | 0.1624 |
| Marker302101 | Chr4 | 17438722 | 17439009 | 22  | 1   | 19  | 1   | 0.9565 | 0.0435 | 0.95   | 0.05   | -0.0065 | 0.0092 |
| Marker292345 | Chr4 | 17465290 | 17465556 | 27  | 33  | 8   | 18  | 0.45   | 0.55   | 0.3077 | 0.6923 | -0.1423 | 0.2012 |
| Marker283865 | Chr4 | 17476326 | 17476621 | 46  | 50  | 48  | 57  | 0.4792 | 0.5208 | 0.4571 | 0.5429 | -0.0221 | 0.0313 |
| Marker299184 | Chr4 | 17566854 | 17567200 | 10  | 49  | 5   | 17  | 0.1695 | 0.8305 | 0.2273 | 0.7727 | 0.0578  | 0.0817 |
| Marker292730 | Chr4 | 17567512 | 17567840 | 24  | 18  | 13  | 22  | 0.5714 | 0.4286 | 0.3714 | 0.6286 | -0.2    | 0.2828 |
| Marker295284 | Chr4 | 17582346 | 17582610 | 24  | 16  | 7   | 16  | 0.6    | 0.4    | 0.3043 | 0.6957 | -0.2957 | 0.4182 |
| Marker298155 | Chr4 | 17598971 | 17599312 | 43  | 26  | 39  | 45  | 0.6232 | 0.3768 | 0.4643 | 0.5357 | -0.1589 | 0.2247 |
| Marker288752 | Chr4 | 18395194 | 18395482 | 14  | 32  | 19  | 15  | 0.3043 | 0.6957 | 0.5588 | 0.4412 | 0.2545  | 0.3599 |
| Marker295842 | Chr4 | 18659203 | 18659453 | 18  | 8   | 20  | 20  | 0.6923 | 0.3077 | 0.5    | 0.5    | -0.1923 | 0.272  |
| Marker310583 | Chr4 | 19092621 | 19092828 | 24  | 4   | 11  | 4   | 0.8571 | 0.1429 | 0.7333 | 0.2667 | -0.1238 | 0.1751 |
| Marker301139 | Chr4 | 19302178 | 19302449 | 40  | 0   | 43  | 1   | 1      | 0      | 0.9773 | 0.0227 | -0.0227 | 0.0321 |
| Marker280736 | Chr4 | 19318431 | 19318706 | 24  | 19  | 23  | 32  | 0.5581 | 0.4419 | 0.4182 | 0.5818 | -0.1399 | 0.1978 |
| Marker291658 | Chr4 | 19333734 | 19334011 | 81  | 55  | 43  | 43  | 0.5956 | 0.4044 | 0.5    | 0.5    | -0.0956 | 0.1352 |
| Marker317843 | Chr4 | 19683363 | 19683714 | 29  | 29  | 14  | 27  | 0.5    | 0.5    | 0.3415 | 0.6585 | -0.1585 | 0.2242 |
| Marker288744 | Chr4 | 19732751 | 19733073 | 8   | 13  | 6   | 5   | 0.381  | 0.619  | 0.5455 | 0.4545 | 0.1645  | 0.2326 |
| Marker317545 | Chr4 | 19740899 | 19741221 | 33  | 42  | 24  | 44  | 0.44   | 0.56   | 0.3529 | 0.6471 | -0.0871 | 0.1232 |
| Marker303126 | Chr4 | 19748630 | 19748909 | 8   | 9   | 4   | 8   | 0.4706 | 0.5294 | 0.3333 | 0.6667 | -0.1373 | 0.1942 |
| Marker314847 | Chr4 | 19827648 | 19827991 | 25  | 30  | 14  | 13  | 0.4545 | 0.5455 | 0.5185 | 0.4815 | 0.064   | 0.0905 |
| Marker289156 | Chr4 | 19849526 | 19849796 | 29  | 4   | 35  | 2   | 0.8788 | 0.1212 | 0.9459 | 0.0541 | 0.0671  | 0.0949 |
| Marker306904 | Chr4 | 19855968 | 19856281 | 108 | 66  | 87  | 82  | 0.6207 | 0.3793 | 0.5148 | 0.4852 | -0.1059 | 0.1498 |
| Marker283731 | Chr4 | 19970502 | 19970777 | 50  | 59  | 30  | 50  | 0.4587 | 0.5413 | 0.375  | 0.625  | -0.0837 | 0.1184 |
| Marker298931 | Chr4 | 19971443 | 19971714 | 44  | 29  | 25  | 46  | 0.6027 | 0.3973 | 0.3521 | 0.6479 | -0.2506 | 0.3544 |
| Marker286348 | Chr4 | 19991016 | 19991319 | 30  | 22  | 26  | 16  | 0.5769 | 0.4231 | 0.619  | 0.381  | 0.0421  | 0.0595 |
| Marker318394 | Chr4 | 19993063 | 19993324 | 31  | 23  | 26  | 16  | 0.5741 | 0.4259 | 0.619  | 0.381  | 0.0449  | 0.0635 |
| Marker318465 | Chr4 | 20000337 | 20000701 | 7   | 6   | 6   | 7   | 0.5385 | 0.4615 | 0.4615 | 0.5385 | -0.077  | 0.1089 |
| Marker307523 | Chr4 | 20004480 | 20004757 | 94  | 86  | 85  | 87  | 0.5222 | 0.4778 | 0.4942 | 0.5058 | -0.028  | 0.0396 |
| Marker308328 | Chr4 | 20083038 | 20083265 | 21  | 4   | 15  | 2   | 0.84   | 0.16   | 0.8824 | 0.1176 | 0.0424  | 0.06   |
| Marker309547 | Chr4 | 20208175 | 20208463 | 58  | 24  | 35  | 43  | 0.7073 | 0.2927 | 0.4487 | 0.5513 | -0.2586 | 0.3657 |
| Marker290446 | Chr4 | 20213926 | 20214236 | 86  | 43  | 40  | 26  | 0.6667 | 0.3333 | 0.6061 | 0.3939 | -0.0606 | 0.0857 |
| Marker314545 | Chr4 | 20357025 | 20357292 | 58  | 9   | 43  | 4   | 0.8657 | 0.1343 | 0.9149 | 0.0851 | 0.0492  | 0.0696 |
| Marker305706 | Chr4 | 20388553 | 20388851 | 21  | 11  | 2   | 8   | 0.6562 | 0.3438 | 0.2    | 0.8    | -0.4562 | 0.6452 |
| Marker287632 | Chr4 | 20415167 | 20415508 | 60  | 24  | 23  | 27  | 0.7143 | 0.2857 | 0.46   | 0.54   | -0.2543 | 0.3596 |
| Marker310990 | Chr4 | 20454831 | 20455108 | 52  | 89  | 54  | 50  | 0.3688 | 0.6312 | 0.5192 | 0.4808 | 0.1504  | 0.2127 |
| Marker287270 | Chr4 | 20490420 | 20490693 | 29  | 17  | 12  | 15  | 0.6304 | 0.3696 | 0.4444 | 0.5556 | -0.186  | 0.263  |
| Marker290281 | Chr4 | 20495215 | 20495536 | 39  | 48  | 21  | 22  | 0.4483 | 0.5517 | 0.4884 | 0.5116 | 0.0401  | 0.0567 |
| Marker313459 | Chr4 | 20520269 | 20520615 | 17  | 12  | 12  | 13  | 0.5862 | 0.4138 | 0.48   | 0.52   | -0.1062 | 0.1502 |
| Marker298035 | Chr4 | 20523855 | 20524098 | 9   | 13  | 4   | 4   | 0.4091 | 0.5909 | 0.5    | 0.5    | 0.0909  | 0.1286 |
| Marker286361 | Chr4 | 20526469 | 20526803 | 46  | 42  | 25  | 39  | 0.5227 | 0.4773 | 0.3906 | 0.6094 | -0.1321 | 0.1868 |
| Marker283238 | Chr4 | 20534604 | 20534916 | 21  | 19  | 9   | 20  | 0.525  | 0.475  | 0.3103 | 0.6897 | -0.2147 | 0.3036 |
| Marker281575 | Chr4 | 20543715 | 20543987 | 32  | 25  | 24  | 18  | 0.5614 | 0.4386 | 0.5714 | 0.4286 | 0.01    | 0.0141 |
| Marker285003 | Chr4 | 20575186 | 20575522 | 8   | 6   | 6   | 2   | 0.5714 | 0.4286 | 0.75   | 0.25   | 0.1786  | 0.2526 |
| Marker289353 | Chr4 | 20576421 | 20576664 | 4   | 14  | 8   | 9   | 0.2222 | 0.7778 | 0.4706 | 0.5294 | 0.2484  | 0.3513 |
| Marker286311 | Chr4 | 20595051 | 20595348 | 60  | 79  | 40  | 56  | 0.4317 | 0.5683 | 0.4167 | 0.5833 | -0.015  | 0.0212 |
| Marker290835 | Chr4 | 20604184 | 20604492 | 47  | 53  | 32  | 20  | 0.47   | 0.53   | 0.6154 | 0.3846 | 0.1454  | 0.2056 |
| Marker297044 | Chr4 | 20610072 | 20610418 | 22  | 28  | 22  | 31  | 0.44   | 0.56   | 0.4151 | 0.5849 | -0.0249 | 0.0352 |
| Marker317872 | Chr4 | 20626287 | 20626639 | 47  | 42  | 17  | 28  | 0.5281 | 0.4719 | 0.3778 | 0.6222 | -0.1503 | 0.2126 |
| Marker315882 | Chr4 | 20638001 | 20638325 | 30  | 33  | 21  | 34  | 0.4762 | 0.5238 | 0.3818 | 0.6182 | -0.0944 | 0.1335 |
| Marker290245 | Chr4 | 20654647 | 20654908 | 9   | 7   | 16  | 12  | 0.5625 | 0.4375 | 0.5714 | 0.4286 | 0.0089  | 0.0126 |

|              |      |          |          |     |     |     |     |        |        |        |        |         |        |
|--------------|------|----------|----------|-----|-----|-----|-----|--------|--------|--------|--------|---------|--------|
| Marker299865 | Chr4 | 20852949 | 20853272 | 41  | 45  | 31  | 40  | 0.4767 | 0.5233 | 0.4366 | 0.5634 | -0.0401 | 0.0567 |
| Marker290366 | Chr4 | 21048269 | 21048529 | 33  | 2   | 26  | 1   | 0.9429 | 0.0571 | 0.963  | 0.037  | 0.0201  | 0.0284 |
| Marker297682 | Chr4 | 21505939 | 21506224 | 51  | 46  | 42  | 40  | 0.5258 | 0.4742 | 0.5122 | 0.4878 | -0.0136 | 0.0192 |
| Marker283922 | Chr4 | 21511921 | 21512243 | 40  | 67  | 33  | 50  | 0.3738 | 0.6262 | 0.3976 | 0.6024 | 0.0238  | 0.0337 |
| Marker293896 | Chr4 | 21516633 | 21516912 | 78  | 84  | 75  | 67  | 0.4815 | 0.5185 | 0.5282 | 0.4718 | 0.0467  | 0.066  |
| Marker305276 | Chr4 | 21775884 | 21776231 | 5   | 10  | 5   | 2   | 0.3333 | 0.6667 | 0.7143 | 0.2857 | 0.381   | 0.5388 |
| Marker317450 | Chr4 | 21778621 | 21778866 | 23  | 25  | 25  | 17  | 0.4792 | 0.5208 | 0.5952 | 0.4048 | 0.116   | 0.164  |
| Marker281705 | Chr4 | 21780475 | 21780737 | 23  | 27  | 10  | 18  | 0.46   | 0.54   | 0.3571 | 0.6429 | -0.1029 | 0.1455 |
| Marker284027 | Chr4 | 21814916 | 21815203 | 42  | 28  | 12  | 23  | 0.6    | 0.4    | 0.3429 | 0.6571 | -0.2571 | 0.3636 |
| Marker294146 | Chr4 | 21884894 | 21885212 | 44  | 31  | 27  | 11  | 0.5867 | 0.4133 | 0.7105 | 0.2895 | 0.1238  | 0.1751 |
| Marker289655 | Chr4 | 21917286 | 21917534 | 25  | 4   | 8   | 14  | 0.8621 | 0.1379 | 0.3636 | 0.6364 | -0.4985 | 0.705  |
| Marker288794 | Chr4 | 22014398 | 22014663 | 17  | 8   | 10  | 5   | 0.68   | 0.32   | 0.6667 | 0.3333 | -0.0133 | 0.0188 |
| Marker308302 | Chr4 | 22029322 | 22029627 | 29  | 28  | 18  | 17  | 0.5088 | 0.4912 | 0.5143 | 0.4857 | 0.0055  | 0.0078 |
| Marker287893 | Chr4 | 22376468 | 22376793 | 8   | 34  | 16  | 18  | 0.1905 | 0.8095 | 0.4706 | 0.5294 | 0.2801  | 0.3961 |
| Marker281441 | Chr4 | 22379357 | 22379642 | 69  | 49  | 45  | 62  | 0.5847 | 0.4153 | 0.4206 | 0.5794 | -0.1641 | 0.2321 |
| Marker318678 | Chr4 | 22379645 | 22379966 | 31  | 34  | 16  | 34  | 0.4769 | 0.5231 | 0.32   | 0.68   | -0.1569 | 0.2219 |
| Marker301275 | Chr4 | 22384703 | 22384998 | 70  | 78  | 47  | 72  | 0.473  | 0.527  | 0.395  | 0.605  | -0.078  | 0.1103 |
| Marker316875 | Chr4 | 22385647 | 22385997 | 33  | 11  | 13  | 13  | 0.75   | 0.25   | 0.5    | 0.5    | -0.25   | 0.3536 |
| Marker303391 | Chr4 | 22498600 | 22498941 | 19  | 8   | 18  | 1   | 0.7037 | 0.2963 | 0.9474 | 0.0526 | 0.2437  | 0.3446 |
| Marker296706 | Chr4 | 22723635 | 22723987 | 9   | 3   | 4   | 10  | 0.75   | 0.25   | 0.2857 | 0.7143 | -0.4643 | 0.6566 |
| Marker292517 | Chr4 | 22987866 | 22988176 | 34  | 12  | 13  | 21  | 0.7391 | 0.2609 | 0.3824 | 0.6176 | -0.3567 | 0.5044 |
| Marker316784 | Chr4 | 23200358 | 23200599 | 18  | 14  | 15  | 16  | 0.5625 | 0.4375 | 0.4839 | 0.5161 | -0.0786 | 0.1112 |
| Marker255892 | Chr5 | 654246   | 654611   | 19  | 6   | 9   | 11  | 0.76   | 0.24   | 0.45   | 0.55   | -0.31   | 0.4384 |
| Marker250002 | Chr5 | 665041   | 665397   | 19  | 15  | 19  | 17  | 0.5588 | 0.4412 | 0.5278 | 0.4722 | -0.031  | 0.0438 |
| Marker235336 | Chr5 | 665916   | 666284   | 18  | 1   | 15  | 14  | 0.9474 | 0.0526 | 0.5172 | 0.4828 | -0.4302 | 0.6084 |
| Marker252246 | Chr5 | 669809   | 670149   | 40  | 26  | 19  | 34  | 0.6061 | 0.3939 | 0.3585 | 0.6415 | -0.2476 | 0.3502 |
| Marker248647 | Chr5 | 672673   | 672992   | 51  | 42  | 31  | 25  | 0.5484 | 0.4516 | 0.5536 | 0.4464 | 0.0052  | 0.0074 |
| Marker262035 | Chr5 | 679171   | 679475   | 20  | 7   | 11  | 7   | 0.7407 | 0.2593 | 0.6111 | 0.3889 | -0.1296 | 0.1833 |
| Marker248371 | Chr5 | 679478   | 679771   | 23  | 8   | 14  | 12  | 0.7419 | 0.2581 | 0.5385 | 0.4615 | -0.2034 | 0.2877 |
| Marker265651 | Chr5 | 679774   | 680028   | 19  | 66  | 9   | 60  | 0.2235 | 0.7765 | 0.1304 | 0.8696 | -0.0931 | 0.1317 |
| Marker267587 | Chr5 | 690873   | 691176   | 129 | 76  | 62  | 81  | 0.6293 | 0.3707 | 0.4336 | 0.5664 | -0.1957 | 0.2768 |
| Marker261560 | Chr5 | 691179   | 691448   | 22  | 15  | 9   | 20  | 0.5946 | 0.4054 | 0.3103 | 0.6897 | -0.2843 | 0.4021 |
| Marker275905 | Chr5 | 694978   | 695286   | 122 | 102 | 91  | 105 | 0.5446 | 0.4554 | 0.4643 | 0.5357 | -0.0803 | 0.1136 |
| Marker268879 | Chr5 | 699618   | 699947   | 40  | 16  | 23  | 17  | 0.7143 | 0.2857 | 0.575  | 0.425  | -0.1393 | 0.197  |
| Marker277833 | Chr5 | 1129586  | 1129908  | 27  | 29  | 21  | 20  | 0.4821 | 0.5179 | 0.5122 | 0.4878 | 0.0301  | 0.0426 |
| Marker236276 | Chr5 | 1139028  | 1139354  | 32  | 29  | 19  | 21  | 0.5246 | 0.4754 | 0.475  | 0.525  | -0.0496 | 0.0701 |
| Marker234641 | Chr5 | 1143438  | 1143720  | 72  | 41  | 57  | 33  | 0.6372 | 0.3628 | 0.6333 | 0.3667 | -0.0039 | 0.0055 |
| Marker258278 | Chr5 | 1149633  | 1149988  | 109 | 72  | 68  | 82  | 0.6022 | 0.3978 | 0.4533 | 0.5467 | -0.1489 | 0.2106 |
| Marker274027 | Chr5 | 1158917  | 1159246  | 56  | 37  | 32  | 25  | 0.6022 | 0.3978 | 0.5614 | 0.4386 | -0.0408 | 0.0577 |
| Marker234134 | Chr5 | 1182135  | 1182462  | 41  | 22  | 13  | 23  | 0.6508 | 0.3492 | 0.3611 | 0.6389 | -0.2897 | 0.4097 |
| Marker276643 | Chr5 | 1881116  | 1881399  | 127 | 43  | 75  | 58  | 0.7471 | 0.2529 | 0.5639 | 0.4361 | -0.1832 | 0.2591 |
| Marker238187 | Chr5 | 2139184  | 2139471  | 30  | 27  | 39  | 13  | 0.5263 | 0.4737 | 0.75   | 0.25   | 0.2237  | 0.3164 |
| Marker258748 | Chr5 | 2141846  | 2142068  | 9   | 4   | 6   | 5   | 0.6923 | 0.3077 | 0.5455 | 0.4545 | -0.1468 | 0.2076 |
| Marker239243 | Chr5 | 2147487  | 2147676  | 8   | 3   | 1   | 9   | 0.7273 | 0.2727 | 0.1    | 0.9    | -0.6273 | 0.8871 |
| Marker254000 | Chr5 | 2151507  | 2151767  | 13  | 22  | 14  | 26  | 0.3714 | 0.6286 | 0.35   | 0.65   | -0.0214 | 0.0303 |
| Marker278713 | Chr5 | 2208761  | 2209054  | 66  | 40  | 46  | 52  | 0.6226 | 0.3774 | 0.4694 | 0.5306 | -0.1532 | 0.2167 |
| Marker236633 | Chr5 | 2213574  | 2213918  | 38  | 19  | 27  | 34  | 0.6667 | 0.3333 | 0.4426 | 0.5574 | -0.2241 | 0.3169 |
| Marker235631 | Chr5 | 2228993  | 2229215  | 3   | 5   | 4   | 4   | 0.375  | 0.625  | 0.5    | 0.5    | 0.125   | 0.1768 |
| Marker269066 | Chr5 | 2249729  | 2250029  | 43  | 33  | 49  | 35  | 0.5658 | 0.4342 | 0.5833 | 0.4167 | 0.0175  | 0.0247 |
| Marker266010 | Chr5 | 2256958  | 2257270  | 94  | 53  | 40  | 47  | 0.6395 | 0.3605 | 0.4598 | 0.5402 | -0.1797 | 0.2541 |
| Marker253071 | Chr5 | 2264887  | 2265217  | 33  | 14  | 26  | 23  | 0.7021 | 0.2979 | 0.5306 | 0.4694 | -0.1715 | 0.2425 |
| Marker273562 | Chr5 | 2289762  | 2290107  | 64  | 41  | 44  | 48  | 0.6095 | 0.3905 | 0.4783 | 0.5217 | -0.1312 | 0.1855 |
| Marker244455 | Chr5 | 2317879  | 2318227  | 22  | 25  | 16  | 10  | 0.4681 | 0.5319 | 0.6154 | 0.3846 | 0.1473  | 0.2083 |
| Marker275846 | Chr5 | 2325920  | 2326284  | 26  | 13  | 10  | 13  | 0.6667 | 0.3333 | 0.4348 | 0.5652 | -0.2319 | 0.328  |
| Marker237945 | Chr5 | 2337791  | 2338071  | 74  | 51  | 49  | 57  | 0.592  | 0.408  | 0.4623 | 0.5377 | -0.1297 | 0.1834 |
| Marker260625 | Chr5 | 2339798  | 2340129  | 45  | 31  | 29  | 41  | 0.5921 | 0.4079 | 0.3413 | 0.5857 | -0.1778 | 0.2514 |
| Marker253538 | Chr5 | 2357287  | 2357633  | 47  | 19  | 25  | 32  | 0.7121 | 0.2879 | 0.4386 | 0.5614 | -0.2735 | 0.3868 |
| Marker269033 | Chr5 | 2528300  | 2528563  | 15  | 8   | 5   | 14  | 0.6522 | 0.3478 | 0.2632 | 0.7368 | -0.389  | 0.5501 |
| Marker257682 | Chr5 | 2923027  | 2923282  | 41  | 23  | 17  | 13  | 0.6406 | 0.3594 | 0.5667 | 0.4333 | -0.0739 | 0.1045 |
| Marker269281 | Chr5 | 3631134  | 3631493  | 11  | 23  | 15  | 7   | 0.3235 | 0.6765 | 0.6818 | 0.3182 | 0.3583  | 0.5067 |
| Marker254332 | Chr5 | 4049058  | 4049356  | 129 | 140 | 115 | 194 | 0.4796 | 0.5204 | 0.3722 | 0.6278 | -0.1074 | 0.1519 |
| Marker246107 | Chr5 | 4050920  | 4051222  | 55  | 53  | 47  | 38  | 0.5093 | 0.4907 | 0.5529 | 0.4471 | 0.0436  | 0.0617 |
| Marker268138 | Chr5 | 4053588  | 4053860  | 85  | 69  | 49  | 64  | 0.5519 | 0.4481 | 0.4336 | 0.5664 | -0.1183 | 0.1673 |
| Marker266382 | Chr5 | 4057320  | 4057638  | 37  | 50  | 36  | 31  | 0.4253 | 0.5747 | 0.5373 | 0.4627 | 0.112   | 0.1584 |
| Marker256979 | Chr5 | 4315640  | 4315954  | 35  | 29  | 18  | 33  | 0.5469 | 0.4531 | 0.3529 | 0.6471 | -0.194  | 0.2744 |
| Marker259819 | Chr5 | 4982543  | 4982812  | 50  | 9   | 38  | 4   | 0.8475 | 0.1525 | 0.9048 | 0.0952 | 0.0573  | 0.081  |
| Marker247768 | Chr5 | 5058441  | 5058713  | 33  | 30  | 30  | 22  | 0.5238 | 0.4762 | 0.5769 | 0.4231 | 0.0531  | 0.0751 |
| Marker253820 | Chr5 | 5074519  | 5074829  | 90  | 68  | 63  | 91  | 0.5696 | 0.4304 | 0.4091 | 0.5909 | -0.1605 | 0.227  |
| Marker241393 | Chr5 | 5074832  | 5075167  | 24  | 35  | 36  | 48  | 0.4068 | 0.5932 | 0.4286 | 0.5714 | 0.0218  | 0.0308 |
| Marker250889 | Chr5 | 5116884  | 5117144  | 52  | 7   | 31  | 3   | 0.8814 | 0.1186 | 0.9118 | 0.0882 | 0.0304  | 0.043  |
| Marker263920 | Chr5 | 5120125  | 5120486  | 30  | 7   | 28  | 4   | 0.8108 | 0.1892 | 0.875  | 0.125  | 0.0642  | 0.0908 |
| Marker238327 | Chr5 | 5127787  | 5128085  | 33  | 8   | 49  | 6   | 0.8049 | 0.1951 | 0.8909 | 0.1091 | 0.086   | 0.1216 |
| Marker242274 | Chr5 | 5137650  | 5137882  | 15  | 1   | 12  | 4   | 0.9375 | 0.0625 | 0.75   | 0.25   | -0.1875 | 0.2652 |
| Marker266040 | Chr5 | 6120552  | 6120837  | 56  | 32  | 26  | 36  | 0.6364 | 0.3636 | 0.4194 | 0.5806 | -0.217  | 0.3069 |
| Marker243966 | Chr5 | 6169285  | 6169527  | 12  | 12  | 13  | 8   | 0.5    | 0.5    | 0.619  | 0.381  | 0.119   | 0.1683 |
| Marker252098 | Chr5 | 6181837  | 6182124  | 43  | 23  | 27  | 15  | 0.6515 | 0.3485 | 0.6429 | 0.3571 | -0.0086 | 0.0122 |
| Marker247267 | Chr5 | 6202838  | 6203091  | 9   | 9   | 9   | 3   | 0.5    | 0.5    | 0.75   | 0.25   | 0.25    | 0.3536 |
| Marker268762 | Chr5 | 6238286  | 6238610  | 13  | 9   | 4   | 11  | 0.5909 | 0.4091 | 0.2667 | 0.7333 | -0.3242 | 0.4585 |
| Marker247439 | Chr5 | 6243373  | 6243680  | 71  | 35  | 43  | 23  | 0.6698 | 0.3302 | 0.6515 | 0.3485 | -0.0183 | 0.0259 |
| Marker241698 | Chr5 | 6286354  | 6286633  | 76  | 60  | 56  | 67  | 0.5588 | 0.4412 | 0.4553 | 0.5447 | -0.1035 | 0.1464 |
| Marker252051 | Chr5 | 6290890  | 6291137  | 7   | 18  | 8   | 11  | 0.28   | 0.72   | 0.4211 | 0.5789 | 0.1411  | 0.1995 |
| Marker273455 | Chr5 | 6296907  | 6297210  | 35  | 55  | 43  | 44  | 0.3889 | 0.6111 | 0.4943 | 0.5057 | 0.1054  | 0.1491 |

|              |      |          |          |     |     |     |     |        |        |        |        |         |        |
|--------------|------|----------|----------|-----|-----|-----|-----|--------|--------|--------|--------|---------|--------|
| Marker275833 | Chr5 | 6299585  | 6299922  | 33  | 31  | 22  | 33  | 0.5156 | 0.4844 | 0.4    | 0.6    | -0.1156 | 0.1635 |
| Marker251802 | Chr5 | 6415603  | 6415864  | 22  | 10  | 8   | 10  | 0.6875 | 0.3125 | 0.4444 | 0.5556 | -0.2431 | 0.3438 |
| Marker235503 | Chr5 | 6440274  | 6440598  | 91  | 48  | 68  | 90  | 0.6547 | 0.3453 | 0.4304 | 0.5696 | -0.2243 | 0.3172 |
| Marker276715 | Chr5 | 6442332  | 6442598  | 59  | 56  | 53  | 60  | 0.513  | 0.487  | 0.469  | 0.531  | -0.044  | 0.0622 |
| Marker278850 | Chr5 | 6607618  | 6607908  | 39  | 26  | 20  | 39  | 0.6    | 0.4    | 0.339  | 0.661  | -0.261  | 0.3691 |
| Marker239936 | Chr5 | 6609462  | 6609805  | 23  | 13  | 15  | 10  | 0.6389 | 0.3611 | 0.6    | 0.4    | -0.0389 | 0.055  |
| Marker269358 | Chr5 | 6628167  | 6628514  | 38  | 22  | 15  | 25  | 0.6333 | 0.3667 | 0.375  | 0.625  | -0.2583 | 0.3653 |
| Marker268862 | Chr5 | 6763762  | 6764066  | 13  | 12  | 16  | 11  | 0.52   | 0.48   | 0.5926 | 0.4074 | 0.0726  | 0.1027 |
| Marker250661 | Chr5 | 6787043  | 6787304  | 7   | 9   | 7   | 13  | 0.4375 | 0.5625 | 0.35   | 0.65   | -0.0875 | 0.1237 |
| Marker251801 | Chr5 | 7077456  | 7077750  | 10  | 27  | 14  | 12  | 0.2703 | 0.7297 | 0.5385 | 0.4615 | 0.2682  | 0.3793 |
| Marker264816 | Chr5 | 7231047  | 7231355  | 30  | 33  | 27  | 25  | 0.4762 | 0.5238 | 0.5192 | 0.4808 | 0.043   | 0.0608 |
| Marker262642 | Chr5 | 7233229  | 7233517  | 57  | 50  | 29  | 38  | 0.5327 | 0.4673 | 0.4328 | 0.5672 | -0.0999 | 0.1413 |
| Marker248673 | Chr5 | 7257909  | 7258207  | 97  | 136 | 99  | 115 | 0.4163 | 0.5837 | 0.4626 | 0.5374 | 0.0463  | 0.0655 |
| Marker240992 | Chr5 | 7258210  | 7258510  | 67  | 58  | 46  | 72  | 0.536  | 0.464  | 0.3898 | 0.6102 | -0.1462 | 0.2068 |
| Marker241061 | Chr5 | 7262592  | 7262959  | 7   | 11  | 7   | 9   | 0.3889 | 0.6111 | 0.4375 | 0.5625 | 0.0486  | 0.0687 |
| Marker259681 | Chr5 | 7362487  | 7362818  | 29  | 35  | 17  | 17  | 0.4531 | 0.5469 | 0.5    | 0.5    | 0.0469  | 0.0663 |
| Marker252811 | Chr5 | 9032920  | 9033250  | 30  | 33  | 24  | 21  | 0.4762 | 0.5238 | 0.5333 | 0.4667 | 0.0571  | 0.0808 |
| Marker247088 | Chr5 | 9137828  | 9138091  | 23  | 5   | 22  | 3   | 0.8214 | 0.1786 | 0.88   | 0.12   | 0.0586  | 0.0829 |
| Marker256930 | Chr5 | 9220939  | 9221238  | 27  | 20  | 18  | 24  | 0.5745 | 0.4255 | 0.4286 | 0.5714 | -0.1459 | 0.2063 |
| Marker246615 | Chr5 | 9224811  | 9225167  | 37  | 34  | 26  | 29  | 0.5211 | 0.4789 | 0.4727 | 0.5273 | -0.0484 | 0.0684 |
| Marker246898 | Chr5 | 9230768  | 9231035  | 40  | 25  | 18  | 16  | 0.6154 | 0.3846 | 0.5294 | 0.4706 | -0.086  | 0.1216 |
| Marker259874 | Chr5 | 9237204  | 9237456  | 11  | 10  | 8   | 4   | 0.5238 | 0.4762 | 0.6667 | 0.3333 | 0.1429  | 0.2021 |
| Marker246169 | Chr5 | 9443684  | 9444004  | 39  | 22  | 22  | 11  | 0.6393 | 0.3607 | 0.6667 | 0.3333 | 0.0274  | 0.0387 |
| Marker274885 | Chr5 | 9465006  | 9465296  | 41  | 29  | 21  | 32  | 0.5857 | 0.4143 | 0.3962 | 0.6038 | -0.1895 | 0.268  |
| Marker266739 | Chr5 | 9465522  | 9465798  | 36  | 28  | 11  | 30  | 0.5625 | 0.4375 | 0.2683 | 0.7317 | -0.2942 | 0.4161 |
| Marker258289 | Chr5 | 10089670 | 10089908 | 19  | 6   | 30  | 3   | 0.76   | 0.24   | 0.9091 | 0.0909 | 0.1491  | 0.2109 |
| Marker274138 | Chr5 | 10089911 | 10090273 | 17  | 12  | 15  | 20  | 0.5862 | 0.4138 | 0.4286 | 0.5714 | -0.1576 | 0.2229 |
| Marker259355 | Chr5 | 10139847 | 10140201 | 10  | 10  | 14  | 14  | 0.5    | 0.5    | 0.5    | 0.5    | 0       | 0      |
| Marker241539 | Chr5 | 10487794 | 10488078 | 50  | 36  | 35  | 31  | 0.5814 | 0.4186 | 0.5303 | 0.4697 | -0.0511 | 0.0723 |
| Marker270670 | Chr5 | 10876751 | 10877098 | 27  | 18  | 20  | 13  | 0.6    | 0.4    | 0.6061 | 0.3939 | 0.0061  | 0.0086 |
| Marker256007 | Chr5 | 11728759 | 11729030 | 33  | 2   | 3   | 9   | 0.9429 | 0.0571 | 0.25   | 0.75   | -0.6929 | 0.9799 |
| Marker259787 | Chr5 | 11763680 | 11764001 | 102 | 63  | 46  | 70  | 0.6182 | 0.3818 | 0.3966 | 0.6034 | -0.2216 | 0.3134 |
| Marker264955 | Chr5 | 12356956 | 12357225 | 87  | 67  | 56  | 75  | 0.5649 | 0.4351 | 0.4275 | 0.5725 | -0.1374 | 0.1943 |
| Marker256695 | Chr5 | 12357228 | 12357581 | 36  | 27  | 26  | 30  | 0.5714 | 0.4286 | 0.4643 | 0.5357 | -0.1071 | 0.1515 |
| Marker235784 | Chr5 | 12556671 | 12557004 | 12  | 3   | 9   | 8   | 0.8    | 0.2    | 0.5294 | 0.4706 | -0.2706 | 0.3827 |
| Marker259668 | Chr5 | 12577411 | 12577764 | 37  | 44  | 21  | 31  | 0.4568 | 0.5432 | 0.4038 | 0.5962 | -0.053  | 0.075  |
| Marker275011 | Chr5 | 12764342 | 12764657 | 15  | 5   | 16  | 1   | 0.75   | 0.25   | 0.9412 | 0.0588 | 0.1912  | 0.2704 |
| Marker251388 | Chr5 | 12947731 | 12947973 | 62  | 1   | 102 | 0   | 0.9841 | 0.0159 | 1      | 0      | 0.0159  | 0.0225 |
| Marker257341 | Chr5 | 13034521 | 13034700 | 11  | 13  | 6   | 12  | 0.4583 | 0.5417 | 0.3333 | 0.6667 | -0.125  | 0.1768 |
| Marker269690 | Chr5 | 13337632 | 13337995 | 16  | 8   | 3   | 5   | 0.6667 | 0.3333 | 0.375  | 0.625  | -0.2917 | 0.4125 |
| Marker253125 | Chr5 | 13579410 | 13579677 | 23  | 27  | 23  | 22  | 0.46   | 0.54   | 0.5111 | 0.4889 | 0.0511  | 0.0723 |
| Marker249337 | Chr5 | 13580057 | 13580320 | 31  | 23  | 24  | 18  | 0.5741 | 0.4259 | 0.5714 | 0.4286 | -0.0027 | 0.0038 |
| Marker257817 | Chr5 | 13580744 | 13581045 | 61  | 33  | 35  | 64  | 0.6489 | 0.3511 | 0.3535 | 0.6465 | -0.2954 | 0.4178 |
| Marker276545 | Chr5 | 13581068 | 13581374 | 92  | 67  | 54  | 70  | 0.5786 | 0.4214 | 0.4355 | 0.5645 | -0.1431 | 0.2024 |
| Marker256944 | Chr5 | 13625870 | 13626224 | 35  | 11  | 37  | 8   | 0.7609 | 0.2391 | 0.8222 | 0.1778 | 0.0613  | 0.0867 |
| Marker246920 | Chr5 | 13653937 | 13654224 | 33  | 40  | 29  | 34  | 0.4521 | 0.5479 | 0.4603 | 0.5397 | 0.0082  | 0.0116 |
| Marker235102 | Chr5 | 13695074 | 13695393 | 95  | 86  | 58  | 73  | 0.5249 | 0.4751 | 0.4427 | 0.5573 | -0.0822 | 0.1162 |
| Marker234681 | Chr5 | 13696584 | 13696886 | 66  | 46  | 48  | 69  | 0.5893 | 0.4107 | 0.4103 | 0.5897 | -0.179  | 0.2531 |
| Marker259611 | Chr5 | 13699557 | 13699873 | 26  | 24  | 13  | 14  | 0.52   | 0.48   | 0.4815 | 0.5185 | -0.0385 | 0.0544 |
| Marker260616 | Chr5 | 13716695 | 13716947 | 18  | 14  | 16  | 13  | 0.5625 | 0.4375 | 0.5517 | 0.4483 | -0.0108 | 0.0153 |
| Marker253817 | Chr5 | 13723011 | 13723215 | 6   | 7   | 7   | 6   | 0.4615 | 0.5385 | 0.5385 | 0.4615 | 0.077   | 0.1089 |
| Marker269467 | Chr5 | 13725091 | 13725414 | 46  | 43  | 35  | 50  | 0.5169 | 0.4831 | 0.4118 | 0.5882 | -0.1051 | 0.1486 |
| Marker266680 | Chr5 | 13726650 | 13726996 | 32  | 23  | 14  | 15  | 0.5818 | 0.4182 | 0.4828 | 0.5172 | -0.099  | 0.14   |
| Marker263663 | Chr5 | 13741864 | 13742153 | 42  | 20  | 24  | 58  | 0.6774 | 0.3226 | 0.2927 | 0.7073 | -0.3847 | 0.544  |
| Marker276279 | Chr5 | 13743792 | 13744118 | 35  | 23  | 39  | 26  | 0.6034 | 0.3966 | 0.6    | 0.4    | -0.0034 | 0.0048 |
| Marker242858 | Chr5 | 13745999 | 13746324 | 43  | 37  | 28  | 50  | 0.5375 | 0.4625 | 0.359  | 0.641  | -0.1785 | 0.2524 |
| Marker274898 | Chr5 | 13751341 | 13751634 | 47  | 52  | 32  | 54  | 0.4747 | 0.5253 | 0.3721 | 0.6279 | -0.1026 | 0.1451 |
| Marker276600 | Chr5 | 14086270 | 14086630 | 16  | 12  | 8   | 8   | 0.5714 | 0.4286 | 0.5    | 0.5    | -0.0714 | 0.101  |
| Marker260965 | Chr5 | 14091556 | 14091873 | 35  | 47  | 37  | 50  | 0.4268 | 0.5732 | 0.4253 | 0.5747 | -0.0015 | 0.0021 |
| Marker255552 | Chr5 | 14151826 | 14152108 | 46  | 42  | 44  | 37  | 0.5227 | 0.4773 | 0.5432 | 0.4568 | 0.0205  | 0.029  |
| Marker262686 | Chr5 | 14152111 | 14152402 | 75  | 48  | 39  | 65  | 0.6098 | 0.3902 | 0.375  | 0.625  | -0.2348 | 0.3321 |
| Marker261244 | Chr5 | 14184466 | 14184725 | 27  | 11  | 5   | 13  | 0.7105 | 0.2895 | 0.2778 | 0.7222 | -0.4327 | 0.6119 |
| Marker277744 | Chr5 | 14434003 | 14434244 | 10  | 2   | 5   | 4   | 0.8333 | 0.1667 | 0.5556 | 0.4444 | -0.2777 | 0.3927 |
| Marker257452 | Chr5 | 14643665 | 14644010 | 51  | 36  | 30  | 26  | 0.5862 | 0.4138 | 0.5357 | 0.4643 | -0.0505 | 0.0714 |
| Marker272713 | Chr5 | 14704384 | 14704743 | 31  | 11  | 17  | 20  | 0.7381 | 0.2619 | 0.4595 | 0.5405 | -0.2786 | 0.394  |
| Marker266484 | Chr5 | 14750348 | 14750601 | 18  | 17  | 16  | 8   | 0.5143 | 0.4857 | 0.6667 | 0.3333 | 0.1524  | 0.2155 |
| Marker253951 | Chr5 | 16111069 | 16111406 | 23  | 29  | 31  | 31  | 0.4423 | 0.5577 | 0.5    | 0.5    | 0.0577  | 0.0816 |
| Marker271575 | Chr5 | 16221890 | 16222248 | 1   | 5   | 8   | 6   | 0.1667 | 0.8333 | 0.5714 | 0.4286 | 0.4047  | 0.5723 |
| Marker277446 | Chr5 | 16361443 | 16361699 | 15  | 17  | 13  | 10  | 0.4688 | 0.5312 | 0.5652 | 0.4348 | 0.0964  | 0.1363 |
| Marker243440 | Chr5 | 16448162 | 16448370 | 11  | 13  | 13  | 11  | 0.4583 | 0.5417 | 0.5417 | 0.4583 | 0.0834  | 0.1179 |
| Marker245775 | Chr5 | 16470447 | 16470745 | 20  | 33  | 12  | 21  | 0.3774 | 0.6226 | 0.3636 | 0.6364 | -0.0138 | 0.0195 |
| Marker243943 | Chr5 | 16476738 | 16476912 | 1   | 7   | 3   | 3   | 0.125  | 0.875  | 0.5    | 0.5    | 0.375   | 0.5303 |
| Marker251226 | Chr5 | 16513537 | 16513826 | 35  | 41  | 11  | 37  | 0.4605 | 0.5395 | 0.2292 | 0.7708 | -0.2313 | 0.3271 |
| Marker264940 | Chr5 | 16682829 | 16683174 | 20  | 20  | 27  | 15  | 0.5    | 0.5    | 0.6429 | 0.3571 | 0.1429  | 0.2021 |
| Marker244729 | Chr5 | 16685520 | 16685546 | 34  | 32  | 33  | 14  | 0.5152 | 0.4848 | 0.7021 | 0.2979 | 0.1869  | 0.2643 |
| Marker262595 | Chr5 | 16693342 | 16693679 | 16  | 30  | 10  | 16  | 0.3478 | 0.6522 | 0.3846 | 0.6154 | 0.0368  | 0.052  |
| Marker236507 | Chr5 | 16697555 | 16697829 | 36  | 31  | 26  | 40  | 0.5373 | 0.4627 | 0.3939 | 0.6061 | -0.1434 | 0.2028 |
| Marker238726 | Chr5 | 16716591 | 16716906 | 27  | 18  | 22  | 13  | 0.6    | 0.4    | 0.6286 | 0.3714 | 0.0286  | 0.0404 |
| Marker234065 | Chr5 | 16720219 | 16720518 | 50  | 53  | 30  | 33  | 0.4854 | 0.5146 | 0.4762 | 0.5238 | -0.0092 | 0.013  |
| Marker275976 | Chr5 | 16744340 | 16744623 | 50  | 50  | 55  | 41  | 0.5    | 0.5    | 0.5729 | 0.4271 | 0.0729  | 0.1031 |
| Marker236442 | Chr5 | 16744626 | 16744911 | 40  | 35  | 23  | 33  | 0.5333 | 0.4667 | 0.4107 | 0.5893 | -0.1226 | 0.1734 |
| Marker240086 | Chr5 | 16908902 | 16909205 | 34  | 39  | 23  | 23  | 0.4658 | 0.5342 | 0.5    | 0.5    | 0.0342  | 0.0484 |

|              |      |          |          |     |     |     |     |        |        |        |        |         |        |
|--------------|------|----------|----------|-----|-----|-----|-----|--------|--------|--------|--------|---------|--------|
| Marker278002 | Chr5 | 16912651 | 16912891 | 5   | 6   | 5   | 9   | 0.4545 | 0.5455 | 0.3571 | 0.6429 | -0.0974 | 0.1377 |
| Marker235670 | Chr5 | 17138555 | 17138856 | 19  | 13  | 4   | 9   | 0.5938 | 0.4062 | 0.3077 | 0.6923 | -0.2861 | 0.4046 |
| Marker256683 | Chr5 | 17141014 | 17141299 | 51  | 49  | 46  | 30  | 0.51   | 0.49   | 0.6053 | 0.3947 | 0.0953  | 0.1348 |
| Marker259178 | Chr5 | 17145042 | 17145382 | 43  | 43  | 29  | 25  | 0.5    | 0.5    | 0.537  | 0.463  | 0.037   | 0.0523 |
| Marker240316 | Chr5 | 17189546 | 17189818 | 42  | 30  | 14  | 19  | 0.5833 | 0.4167 | 0.4242 | 0.5758 | -0.1591 | 0.225  |
| Marker274919 | Chr5 | 17193180 | 17193462 | 30  | 47  | 27  | 32  | 0.3896 | 0.6104 | 0.4576 | 0.5424 | 0.068   | 0.0962 |
| Marker256125 | Chr5 | 17193665 | 17193955 | 49  | 56  | 60  | 45  | 0.4667 | 0.5333 | 0.5714 | 0.4286 | 0.1047  | 0.1481 |
| Marker254301 | Chr5 | 17211370 | 17211645 | 39  | 30  | 21  | 21  | 0.5652 | 0.4348 | 0.5    | 0.5    | -0.0652 | 0.0922 |
| Marker247700 | Chr5 | 17212561 | 17212766 | 13  | 12  | 11  | 12  | 0.52   | 0.48   | 0.4783 | 0.5217 | -0.0417 | 0.059  |
| Marker270592 | Chr5 | 17254798 | 17255145 | 22  | 29  | 11  | 22  | 0.4314 | 0.5686 | 0.3333 | 0.6667 | -0.0981 | 0.1387 |
| Marker261760 | Chr5 | 17256227 | 17256518 | 56  | 74  | 64  | 84  | 0.4308 | 0.5692 | 0.4324 | 0.5676 | 0.0016  | 0.0023 |
| Marker269419 | Chr5 | 17259487 | 17259788 | 70  | 48  | 55  | 74  | 0.5932 | 0.4068 | 0.4264 | 0.5736 | -0.1668 | 0.2359 |
| Marker277060 | Chr5 | 17287424 | 17287728 | 54  | 29  | 20  | 19  | 0.6506 | 0.3494 | 0.5128 | 0.4872 | -0.1378 | 0.1949 |
| Marker249977 | Chr5 | 17291845 | 17292127 | 29  | 25  | 7   | 10  | 0.537  | 0.463  | 0.4118 | 0.5882 | -0.1252 | 0.1771 |
| Marker235996 | Chr5 | 17294881 | 17295195 | 97  | 68  | 74  | 81  | 0.5879 | 0.4121 | 0.4774 | 0.5226 | -0.1105 | 0.1563 |
| Marker249468 | Chr5 | 17301508 | 17301846 | 23  | 22  | 17  | 21  | 0.5111 | 0.4889 | 0.4474 | 0.5526 | -0.0637 | 0.0901 |
| Marker236815 | Chr5 | 17302026 | 17302289 | 28  | 16  | 13  | 15  | 0.6364 | 0.3636 | 0.4643 | 0.5357 | -0.1721 | 0.2434 |
| Marker267965 | Chr5 | 17302883 | 17303182 | 40  | 45  | 26  | 45  | 0.4706 | 0.5294 | 0.3662 | 0.6338 | -0.1044 | 0.1476 |
| Marker241749 | Chr5 | 17303751 | 17304020 | 52  | 44  | 31  | 23  | 0.5417 | 0.4583 | 0.5741 | 0.4259 | 0.0324  | 0.0458 |
| Marker269415 | Chr5 | 17408128 | 17408395 | 40  | 17  | 33  | 28  | 0.7018 | 0.2982 | 0.541  | 0.459  | -0.1608 | 0.2274 |
| Marker249133 | Chr5 | 17519302 | 17519572 | 21  | 16  | 17  | 14  | 0.5676 | 0.4324 | 0.5484 | 0.4516 | -0.0192 | 0.0272 |
| Marker274045 | Chr5 | 17705758 | 17706042 | 105 | 19  | 85  | 11  | 0.8468 | 0.1532 | 0.8854 | 0.1146 | 0.0386  | 0.0546 |
| Marker235207 | Chr5 | 17772124 | 17772477 | 38  | 26  | 13  | 21  | 0.5938 | 0.4062 | 0.3824 | 0.6176 | -0.2114 | 0.299  |
| Marker250363 | Chr5 | 17800012 | 17800365 | 21  | 25  | 10  | 20  | 0.4565 | 0.5435 | 0.3333 | 0.6667 | -0.1232 | 0.1742 |
| Marker255936 | Chr5 | 17892829 | 17893082 | 13  | 4   | 14  | 3   | 0.7647 | 0.2353 | 0.8235 | 0.1765 | 0.0588  | 0.0832 |
| Marker264016 | Chr5 | 18128239 | 18128562 | 35  | 31  | 20  | 19  | 0.5303 | 0.4697 | 0.5128 | 0.4872 | -0.0175 | 0.0247 |
| Marker255934 | Chr5 | 18140229 | 18140499 | 63  | 68  | 33  | 56  | 0.4809 | 0.5191 | 0.3708 | 0.6292 | -0.1101 | 0.1557 |
| Marker265449 | Chr5 | 18145394 | 18145714 | 35  | 37  | 18  | 30  | 0.4861 | 0.5139 | 0.375  | 0.625  | -0.1111 | 0.1571 |
| Marker255492 | Chr5 | 18195380 | 18195641 | 7   | 9   | 7   | 6   | 0.4375 | 0.5625 | 0.5385 | 0.4615 | 0.101   | 0.1428 |
| Marker255701 | Chr5 | 18198012 | 18198261 | 14  | 15  | 13  | 13  | 0.4828 | 0.5172 | 0.5    | 0.5    | 0.0172  | 0.0243 |
| Marker271181 | Chr5 | 18198888 | 18199206 | 40  | 21  | 25  | 30  | 0.6557 | 0.3443 | 0.4545 | 0.5455 | -0.2012 | 0.2845 |
| Marker239098 | Chr5 | 18202575 | 18202835 | 15  | 19  | 9   | 12  | 0.4412 | 0.5588 | 0.4286 | 0.5714 | -0.0126 | 0.0178 |
| Marker251128 | Chr5 | 18203301 | 18203545 | 6   | 8   | 3   | 8   | 0.4286 | 0.5714 | 0.2727 | 0.7273 | -0.1559 | 0.2205 |
| Marker262383 | Chr5 | 18206772 | 18207097 | 56  | 36  | 25  | 53  | 0.6087 | 0.3913 | 0.3205 | 0.6795 | -0.2882 | 0.4076 |
| Marker250090 | Chr5 | 18490155 | 18490480 | 30  | 35  | 19  | 34  | 0.4615 | 0.5385 | 0.3585 | 0.6415 | -0.103  | 0.1457 |
| Marker246658 | Chr5 | 18533222 | 18533502 | 37  | 7   | 41  | 4   | 0.8409 | 0.1591 | 0.9111 | 0.0889 | 0.0702  | 0.0993 |
| Marker249956 | Chr5 | 18760037 | 18760378 | 37  | 15  | 47  | 1   | 0.7115 | 0.2885 | 0.9792 | 0.0208 | 0.2677  | 0.3786 |
| Marker260076 | Chr5 | 18999174 | 18999420 | 5   | 14  | 7   | 8   | 0.2632 | 0.7368 | 0.4667 | 0.5333 | 0.2035  | 0.2878 |
| Marker266563 | Chr5 | 19022103 | 19022405 | 80  | 19  | 83  | 14  | 0.8081 | 0.1919 | 0.8557 | 0.1443 | 0.0476  | 0.0673 |
| Marker248464 | Chr5 | 20151373 | 20151614 | 12  | 6   | 7   | 9   | 0.6667 | 0.3333 | 0.4375 | 0.5625 | -0.2292 | 0.3241 |
| Marker234749 | Chr5 | 20164196 | 20164487 | 5   | 12  | 2   | 14  | 0.2941 | 0.7059 | 0.125  | 0.875  | -0.1691 | 0.2391 |
| Marker240424 | Chr5 | 20166328 | 20166634 | 13  | 7   | 12  | 9   | 0.65   | 0.35   | 0.5714 | 0.4286 | -0.0786 | 0.1112 |
| Marker265775 | Chr5 | 20166725 | 20167003 | 28  | 14  | 14  | 25  | 0.6667 | 0.3333 | 0.359  | 0.641  | -0.3077 | 0.4352 |
| Marker276541 | Chr5 | 20387788 | 20388135 | 39  | 28  | 46  | 34  | 0.5821 | 0.4179 | 0.575  | 0.425  | -0.0071 | 0.01   |
| Marker273032 | Chr5 | 20388615 | 20388854 | 10  | 7   | 5   | 8   | 0.5882 | 0.4118 | 0.3846 | 0.6154 | -0.2036 | 0.2879 |
| Marker236278 | Chr5 | 20397371 | 20397641 | 45  | 62  | 32  | 69  | 0.4206 | 0.5794 | 0.3168 | 0.6832 | -0.1038 | 0.1468 |
| Marker241201 | Chr5 | 20403571 | 20403829 | 21  | 13  | 8   | 10  | 0.6176 | 0.3824 | 0.4444 | 0.5556 | -0.1732 | 0.2449 |
| Marker234778 | Chr5 | 20473855 | 20474169 | 30  | 34  | 17  | 34  | 0.4688 | 0.5312 | 0.3333 | 0.6667 | -0.1355 | 0.1916 |
| Marker256609 | Chr5 | 20477825 | 20478135 | 57  | 47  | 36  | 60  | 0.5481 | 0.4519 | 0.375  | 0.625  | -0.1731 | 0.2448 |
| Marker246646 | Chr5 | 20494826 | 20495136 | 35  | 17  | 15  | 15  | 0.6731 | 0.3269 | 0.5    | 0.5    | -0.1731 | 0.2448 |
| Marker265755 | Chr5 | 20495158 | 20495390 | 13  | 10  | 9   | 12  | 0.5652 | 0.4348 | 0.4286 | 0.5714 | -0.1366 | 0.1932 |
| Marker254306 | Chr5 | 20495393 | 20495756 | 8   | 16  | 10  | 19  | 0.3333 | 0.6667 | 0.3448 | 0.6552 | 0.0115  | 0.0163 |
| Marker263750 | Chr5 | 20495759 | 20496014 | 22  | 20  | 15  | 13  | 0.5238 | 0.4762 | 0.5357 | 0.4643 | 0.0119  | 0.0168 |
| Marker257079 | Chr5 | 21979378 | 21979641 | 10  | 7   | 2   | 3   | 0.5882 | 0.4118 | 0.4    | 0.6    | -0.1882 | 0.2662 |
| Marker233947 | Chr5 | 22038746 | 22038997 | 12  | 7   | 3   | 4   | 0.6316 | 0.3684 | 0.4286 | 0.5714 | -0.203  | 0.2871 |
| Marker244750 | Chr5 | 22083175 | 22083480 | 31  | 20  | 18  | 16  | 0.6078 | 0.3922 | 0.5294 | 0.4706 | -0.0784 | 0.1109 |
| Marker251472 | Chr5 | 22108772 | 22109039 | 19  | 16  | 9   | 11  | 0.5429 | 0.4571 | 0.45   | 0.55   | -0.0929 | 0.1314 |
| Marker237488 | Chr5 | 22298203 | 22298396 | 9   | 9   | 11  | 10  | 0.5    | 0.5    | 0.5238 | 0.4762 | 0.0238  | 0.0337 |
| Marker245380 | Chr5 | 22735271 | 22735546 | 47  | 23  | 34  | 29  | 0.6714 | 0.3286 | 0.5397 | 0.4603 | -0.1317 | 0.1863 |
| Marker275179 | Chr5 | 22736117 | 22736472 | 24  | 13  | 12  | 11  | 0.6486 | 0.3514 | 0.5217 | 0.4783 | -0.1269 | 0.1795 |
| Marker275073 | Chr5 | 22737712 | 22738066 | 33  | 25  | 21  | 24  | 0.569  | 0.431  | 0.4667 | 0.5333 | -0.1023 | 0.1447 |
| Marker252113 | Chr5 | 22782026 | 22782375 | 105 | 122 | 108 | 106 | 0.4626 | 0.5374 | 0.5047 | 0.4953 | 0.0421  | 0.0595 |
| Marker234097 | Chr5 | 22795250 | 22795616 | 26  | 16  | 23  | 20  | 0.619  | 0.381  | 0.5349 | 0.4651 | -0.0841 | 0.1189 |
| Marker264078 | Chr5 | 22803007 | 22803203 | 11  | 12  | 7   | 5   | 0.4783 | 0.5217 | 0.5833 | 0.4167 | 0.105   | 0.1485 |
| Marker268353 | Chr5 | 22805253 | 22805539 | 75  | 57  | 37  | 44  | 0.5682 | 0.4318 | 0.4568 | 0.5432 | -0.1114 | 0.1575 |
| Marker264893 | Chr5 | 22818213 | 22818477 | 61  | 43  | 44  | 50  | 0.5865 | 0.4135 | 0.4681 | 0.5319 | -0.1184 | 0.1674 |
| Marker271658 | Chr5 | 22832619 | 22832906 | 58  | 55  | 58  | 39  | 0.5133 | 0.4867 | 0.5979 | 0.4021 | 0.0846  | 0.1196 |
| Marker252702 | Chr5 | 22836552 | 22836870 | 218 | 149 | 160 | 140 | 0.594  | 0.406  | 0.5333 | 0.4667 | -0.0607 | 0.0858 |
| Marker245169 | Chr5 | 22849092 | 22849338 | 15  | 12  | 11  | 13  | 0.5556 | 0.4444 | 0.4583 | 0.5417 | -0.0973 | 0.1376 |
| Marker274288 | Chr5 | 22849341 | 22849643 | 224 | 132 | 144 | 188 | 0.6292 | 0.3708 | 0.4337 | 0.5663 | -0.1955 | 0.2765 |
| Marker248766 | Chr5 | 23152341 | 23152679 | 27  | 27  | 29  | 19  | 0.5    | 0.5    | 0.6042 | 0.3958 | 0.1042  | 0.1474 |
| Marker236834 | Chr5 | 23438463 | 23438696 | 15  | 9   | 3   | 13  | 0.625  | 0.375  | 0.1875 | 0.8125 | -0.4375 | 0.6187 |
| Marker256839 | Chr5 | 23463480 | 23463786 | 27  | 15  | 28  | 15  | 0.6429 | 0.3571 | 0.6512 | 0.3488 | 0.0083  | 0.0117 |
| Marker237058 | Chr5 | 23466170 | 23466465 | 77  | 64  | 39  | 58  | 0.5461 | 0.4539 | 0.4021 | 0.5979 | -0.144  | 0.2036 |
| Marker268942 | Chr5 | 23466468 | 23466795 | 51  | 50  | 41  | 61  | 0.505  | 0.495  | 0.402  | 0.598  | -0.103  | 0.1457 |
| Marker250326 | Chr5 | 23475217 | 23475516 | 50  | 30  | 34  | 21  | 0.625  | 0.375  | 0.6182 | 0.3818 | -0.0068 | 0.0096 |
| Marker267231 | Chr5 | 23479449 | 23479719 | 57  | 54  | 58  | 52  | 0.5135 | 0.4865 | 0.5273 | 0.4727 | 0.0138  | 0.0195 |
| Marker262246 | Chr5 | 23498982 | 23499248 | 47  | 15  | 27  | 35  | 0.7581 | 0.2419 | 0.4355 | 0.5645 | -0.3226 | 0.4562 |
| Marker247425 | Chr5 | 24330958 | 24331291 | 28  | 16  | 30  | 20  | 0.6364 | 0.3636 | 0.6    | 0.4    | -0.0364 | 0.0515 |
| Marker241324 | Chr5 | 24829624 | 24829912 | 54  | 21  | 21  | 33  | 0.72   | 0.28   | 0.3889 | 0.6111 | -0.3311 | 0.4682 |
| Marker260589 | Chr5 | 24832981 | 24833237 | 11  | 7   | 2   | 5   | 0.6111 | 0.3889 | 0.2857 | 0.7143 | -0.3254 | 0.4602 |
| Marker256956 | Chr5 | 24871837 | 24872162 | 47  | 15  | 27  | 25  | 0.7581 | 0.2419 | 0.5192 | 0.4808 | -0.2389 | 0.3379 |

|              |      |          |          |     |     |     |     |        |        |        |        |         |        |
|--------------|------|----------|----------|-----|-----|-----|-----|--------|--------|--------|--------|---------|--------|
| Marker278333 | Chr5 | 24903172 | 24903438 | 44  | 35  | 48  | 33  | 0.557  | 0.443  | 0.5926 | 0.4074 | 0.0356  | 0.0503 |
| Marker255720 | Chr5 | 25296116 | 25296407 | 85  | 49  | 63  | 47  | 0.6343 | 0.3657 | 0.5727 | 0.4273 | -0.0616 | 0.0871 |
| Marker248098 | Chr5 | 25366999 | 25367256 | 17  | 22  | 18  | 7   | 0.4359 | 0.5641 | 0.72   | 0.28   | 0.2841  | 0.4018 |
| Marker267537 | Chr5 | 25740343 | 25740582 | 13  | 7   | 11  | 11  | 0.65   | 0.35   | 0.5    | 0.5    | -0.15   | 0.2121 |
| Marker269140 | Chr5 | 26432480 | 26432746 | 19  | 1   | 23  | 0   | 0.95   | 0.05   | 1      | 0      | 0.05    | 0.0707 |
| Marker245698 | Chr5 | 26444621 | 26444915 | 112 | 1   | 81  | 2   | 0.9912 | 0.0088 | 0.9759 | 0.0241 | -0.0153 | 0.0216 |
| Marker242728 | Chr5 | 26514317 | 26514646 | 48  | 3   | 22  | 5   | 0.9412 | 0.0588 | 0.8148 | 0.1852 | -0.1264 | 0.1788 |
| Marker258243 | Chr5 | 26515421 | 26515689 | 99  | 12  | 82  | 7   | 0.8919 | 0.1081 | 0.9213 | 0.0787 | 0.0294  | 0.0416 |
| Marker257397 | Chr5 | 27562341 | 27562656 | 60  | 39  | 48  | 36  | 0.6061 | 0.3939 | 0.5714 | 0.4286 | -0.0347 | 0.0491 |
| Marker235021 | Chr5 | 27603664 | 27603904 | 12  | 5   | 9   | 4   | 0.7059 | 0.2941 | 0.6923 | 0.3077 | -0.0136 | 0.0192 |
| Marker261939 | Chr5 | 27660935 | 27661208 | 92  | 30  | 96  | 17  | 0.7541 | 0.2459 | 0.8496 | 0.1504 | 0.0955  | 0.1351 |
| Marker268549 | Chr5 | 27698437 | 27698737 | 21  | 18  | 12  | 6   | 0.5385 | 0.4615 | 0.6667 | 0.3333 | 0.1282  | 0.1813 |
| Marker258242 | Chr5 | 27701407 | 27701687 | 41  | 28  | 45  | 36  | 0.5942 | 0.4058 | 0.5556 | 0.4444 | -0.0386 | 0.0546 |
| Marker245875 | Chr5 | 27714534 | 27714798 | 34  | 25  | 20  | 14  | 0.5763 | 0.4237 | 0.5882 | 0.4118 | 0.0119  | 0.0168 |
| Marker235933 | Chr5 | 27730410 | 27730737 | 49  | 23  | 32  | 28  | 0.6806 | 0.3194 | 0.5333 | 0.4667 | -0.1473 | 0.2083 |
| Marker261479 | Chr5 | 27733733 | 27734060 | 46  | 13  | 12  | 10  | 0.7797 | 0.2203 | 0.5455 | 0.4545 | -0.2342 | 0.3312 |
| Marker251614 | Chr5 | 27737053 | 27737273 | 12  | 5   | 2   | 5   | 0.7059 | 0.2941 | 0.2857 | 0.7143 | -0.4202 | 0.5943 |
| Marker264921 | Chr5 | 27755576 | 27755853 | 40  | 38  | 53  | 37  | 0.5128 | 0.4872 | 0.5889 | 0.4111 | 0.0761  | 0.1076 |
| Marker241922 | Chr5 | 27758732 | 27759058 | 97  | 36  | 49  | 45  | 0.7293 | 0.2707 | 0.5213 | 0.4787 | -0.208  | 0.2942 |
| Marker239433 | Chr5 | 27773859 | 27774144 | 57  | 38  | 32  | 29  | 0.6    | 0.4    | 0.5246 | 0.4754 | -0.0754 | 0.1066 |
| Marker261628 | Chr5 | 27774147 | 27774485 | 47  | 9   | 33  | 17  | 0.8393 | 0.1607 | 0.66   | 0.34   | -0.1793 | 0.2536 |
| Marker277138 | Chr5 | 27780233 | 27780527 | 26  | 10  | 11  | 9   | 0.7222 | 0.2778 | 0.55   | 0.45   | -0.1722 | 0.2435 |
| Marker259740 | Chr5 | 27866552 | 27866827 | 22  | 8   | 8   | 4   | 0.7333 | 0.2667 | 0.6667 | 0.3333 | -0.0666 | 0.0942 |
| Marker242343 | Chr5 | 27958233 | 27958487 | 6   | 8   | 3   | 17  | 0.4286 | 0.5714 | 0.15   | 0.85   | -0.2786 | 0.394  |
| Marker275696 | Chr5 | 27966829 | 27967171 | 32  | 13  | 11  | 12  | 0.7111 | 0.2889 | 0.4783 | 0.5217 | -0.2328 | 0.3292 |
| Marker184423 | Chr6 | 910208   | 910565   | 17  | 14  | 7   | 6   | 0.5484 | 0.4516 | 0.5385 | 0.4615 | -0.0099 | 0.014  |
| Marker190456 | Chr6 | 957883   | 958218   | 45  | 36  | 32  | 51  | 0.5556 | 0.4444 | 0.3855 | 0.6145 | -0.1701 | 0.2406 |
| Marker175854 | Chr6 | 973780   | 974134   | 19  | 16  | 2   | 9   | 0.5429 | 0.4571 | 0.1818 | 0.8182 | -0.3611 | 0.5107 |
| Marker171569 | Chr6 | 974780   | 975106   | 21  | 17  | 17  | 22  | 0.5526 | 0.4474 | 0.4359 | 0.5641 | -0.1167 | 0.165  |
| Marker167705 | Chr6 | 981388   | 981733   | 30  | 27  | 19  | 16  | 0.5263 | 0.4737 | 0.5429 | 0.4571 | 0.0166  | 0.0235 |
| Marker173836 | Chr6 | 986414   | 986686   | 48  | 21  | 38  | 35  | 0.6957 | 0.3043 | 0.5205 | 0.4795 | -0.1752 | 0.2478 |
| Marker168436 | Chr6 | 986913   | 987230   | 48  | 40  | 46  | 50  | 0.5455 | 0.4545 | 0.4792 | 0.5208 | -0.0663 | 0.0938 |
| Marker179210 | Chr6 | 988110   | 988450   | 16  | 17  | 12  | 1   | 0.4848 | 0.5152 | 0.9231 | 0.0769 | 0.4383  | 0.6198 |
| Marker195357 | Chr6 | 995639   | 995901   | 5   | 16  | 11  | 15  | 0.2381 | 0.7619 | 0.4231 | 0.5769 | 0.185   | 0.2616 |
| Marker179592 | Chr6 | 1027274  | 1027603  | 28  | 22  | 35  | 22  | 0.56   | 0.44   | 0.614  | 0.386  | 0.054   | 0.0764 |
| Marker183116 | Chr6 | 1051723  | 1052065  | 21  | 26  | 18  | 10  | 0.4468 | 0.5532 | 0.6429 | 0.3571 | 0.1961  | 0.2773 |
| Marker153261 | Chr6 | 1131906  | 1132184  | 22  | 16  | 19  | 19  | 0.5789 | 0.4211 | 0.5    | 0.5    | -0.0789 | 0.1116 |
| Marker159458 | Chr6 | 2578898  | 2579256  | 47  | 33  | 46  | 37  | 0.5875 | 0.4125 | 0.5542 | 0.4458 | -0.0333 | 0.0471 |
| Marker184157 | Chr6 | 3885719  | 3886052  | 29  | 30  | 35  | 27  | 0.4915 | 0.5085 | 0.5645 | 0.4355 | 0.073   | 0.1032 |
| Marker153168 | Chr6 | 4068438  | 4068697  | 28  | 8   | 21  | 15  | 0.7778 | 0.2222 | 0.5833 | 0.4167 | -0.1945 | 0.2751 |
| Marker168710 | Chr6 | 4093978  | 4094323  | 28  | 8   | 42  | 7   | 0.7778 | 0.2222 | 0.8571 | 0.1429 | 0.0793  | 0.1121 |
| Marker175058 | Chr6 | 4117564  | 4117794  | 16  | 4   | 9   | 2   | 0.8    | 0.2    | 0.8182 | 0.1818 | 0.0182  | 0.0257 |
| Marker180933 | Chr6 | 4135108  | 4135395  | 42  | 24  | 35  | 15  | 0.6364 | 0.3636 | 0.7    | 0.3    | 0.0636  | 0.0899 |
| Marker158412 | Chr6 | 7532997  | 7533324  | 50  | 16  | 22  | 42  | 0.7576 | 0.2424 | 0.3438 | 0.6562 | -0.4138 | 0.5852 |
| Marker164288 | Chr6 | 7537311  | 7537607  | 138 | 119 | 94  | 215 | 0.537  | 0.463  | 0.3042 | 0.6958 | -0.2328 | 0.3292 |
| Marker185424 | Chr6 | 7543151  | 7543497  | 19  | 9   | 12  | 17  | 0.6786 | 0.3214 | 0.4138 | 0.5862 | -0.2648 | 0.3745 |
| Marker167813 | Chr6 | 7544497  | 7544750  | 6   | 7   | 6   | 9   | 0.4615 | 0.5385 | 0.4    | 0.6    | -0.0615 | 0.087  |
| Marker155879 | Chr6 | 7573600  | 7573844  | 7   | 10  | 9   | 7   | 0.4118 | 0.5882 | 0.5625 | 0.4375 | 0.1507  | 0.2131 |
| Marker195750 | Chr6 | 7579305  | 7579621  | 19  | 9   | 17  | 26  | 0.6786 | 0.3214 | 0.3953 | 0.6047 | -0.2833 | 0.4006 |
| Marker173553 | Chr6 | 7596876  | 7597204  | 55  | 30  | 28  | 48  | 0.6471 | 0.3529 | 0.3684 | 0.6316 | -0.2787 | 0.3941 |
| Marker196909 | Chr6 | 7600751  | 7601058  | 67  | 45  | 57  | 63  | 0.5982 | 0.4018 | 0.475  | 0.525  | -0.1232 | 0.1742 |
| Marker151467 | Chr6 | 7617303  | 7617572  | 64  | 50  | 30  | 44  | 0.5614 | 0.4386 | 0.4054 | 0.5946 | -0.156  | 0.2206 |
| Marker161808 | Chr6 | 7652892  | 7653247  | 18  | 13  | 8   | 6   | 0.5806 | 0.4194 | 0.5714 | 0.4286 | -0.0092 | 0.013  |
| Marker161303 | Chr6 | 7653279  | 7653594  | 67  | 31  | 28  | 45  | 0.6837 | 0.3163 | 0.3836 | 0.6164 | -0.3001 | 0.4244 |
| Marker185794 | Chr6 | 7722609  | 7722906  | 50  | 16  | 31  | 28  | 0.7576 | 0.2424 | 0.5254 | 0.4746 | -0.2322 | 0.3284 |
| Marker170311 | Chr6 | 7732941  | 7733207  | 37  | 17  | 16  | 15  | 0.6852 | 0.3148 | 0.5161 | 0.4839 | -0.1691 | 0.2391 |
| Marker163113 | Chr6 | 7862614  | 7862887  | 44  | 24  | 24  | 32  | 0.6471 | 0.3529 | 0.4286 | 0.5714 | -0.2185 | 0.309  |
| Marker173575 | Chr6 | 7997484  | 7997789  | 59  | 67  | 53  | 72  | 0.4683 | 0.5317 | 0.424  | 0.576  | -0.0443 | 0.0626 |
| Marker160395 | Chr6 | 8008042  | 8008404  | 11  | 10  | 5   | 6   | 0.5238 | 0.4762 | 0.4545 | 0.5455 | -0.0693 | 0.098  |
| Marker169818 | Chr6 | 8014499  | 8014775  | 179 | 17  | 65  | 25  | 0.9133 | 0.0867 | 0.7222 | 0.2778 | -0.1911 | 0.2703 |
| Marker192489 | Chr6 | 8024421  | 8024669  | 12  | 6   | 7   | 9   | 0.6667 | 0.3333 | 0.4375 | 0.5625 | -0.2292 | 0.3241 |
| Marker152064 | Chr6 | 8041556  | 8041858  | 28  | 26  | 19  | 31  | 0.5185 | 0.4815 | 0.38   | 0.62   | -0.1385 | 0.1959 |
| Marker196855 | Chr6 | 8272737  | 8273248  | 120 | 104 | 109 | 109 | 0.5357 | 0.4643 | 0.5    | 0.5    | -0.0357 | 0.0505 |
| Marker172916 | Chr6 | 8333229  | 8333544  | 19  | 6   | 12  | 8   | 0.76   | 0.24   | 0.6    | 0.4    | -0.16   | 0.2263 |
| Marker197727 | Chr6 | 8420897  | 8421154  | 14  | 8   | 14  | 11  | 0.6364 | 0.3636 | 0.56   | 0.44   | -0.0764 | 0.108  |
| Marker193689 | Chr6 | 8421592  | 8421830  | 18  | 8   | 12  | 13  | 0.6923 | 0.3077 | 0.48   | 0.52   | -0.2123 | 0.3002 |
| Marker174763 | Chr6 | 8434459  | 8434763  | 30  | 27  | 16  | 37  | 0.5263 | 0.4737 | 0.3019 | 0.6981 | -0.2244 | 0.3173 |
| Marker157462 | Chr6 | 8450315  | 8450614  | 46  | 25  | 20  | 28  | 0.6479 | 0.3521 | 0.4167 | 0.5833 | -0.2312 | 0.327  |
| Marker193325 | Chr6 | 8478644  | 8478933  | 51  | 37  | 29  | 37  | 0.5795 | 0.4205 | 0.4394 | 0.5606 | -0.1401 | 0.1981 |
| Marker153740 | Chr6 | 8495054  | 8495367  | 10  | 20  | 8   | 4   | 0.3333 | 0.6667 | 0.6667 | 0.3333 | 0.3334  | 0.4715 |
| Marker175879 | Chr6 | 8646513  | 8646801  | 115 | 24  | 45  | 47  | 0.8273 | 0.1727 | 0.4891 | 0.5109 | -0.3382 | 0.4783 |
| Marker188282 | Chr6 | 8725032  | 8725319  | 55  | 21  | 18  | 40  | 0.7237 | 0.2763 | 0.3103 | 0.6897 | -0.4134 | 0.5846 |
| Marker175989 | Chr6 | 8736591  | 8736849  | 12  | 10  | 5   | 21  | 0.5455 | 0.4545 | 0.1923 | 0.8077 | -0.3532 | 0.4995 |
| Marker157516 | Chr6 | 8747618  | 8747961  | 26  | 20  | 12  | 13  | 0.5652 | 0.4348 | 0.48   | 0.52   | -0.0852 | 0.1205 |
| Marker187587 | Chr6 | 8759560  | 8759857  | 45  | 30  | 43  | 38  | 0.6    | 0.4    | 0.5309 | 0.4691 | -0.0691 | 0.0977 |
| Marker193629 | Chr6 | 8759994  | 8760250  | 13  | 10  | 2   | 12  | 0.5652 | 0.4348 | 0.1429 | 0.8571 | -0.4223 | 0.5972 |
| Marker180982 | Chr6 | 8770121  | 8770442  | 33  | 24  | 7   | 19  | 0.5789 | 0.4211 | 0.2692 | 0.7308 | -0.3097 | 0.438  |
| Marker159532 | Chr6 | 8778176  | 8778523  | 55  | 29  | 30  | 52  | 0.6548 | 0.3452 | 0.3659 | 0.6341 | -0.2889 | 0.4086 |
| Marker153130 | Chr6 | 8778771  | 8779045  | 53  | 33  | 23  | 43  | 0.6163 | 0.3837 | 0.3485 | 0.6515 | -0.2678 | 0.3787 |
| Marker155193 | Chr6 | 8780545  | 8780847  | 9   | 11  | 1   | 15  | 0.45   | 0.55   | 0.0625 | 0.9375 | -0.3875 | 0.548  |
| Marker193004 | Chr6 | 8801044  | 8801405  | 20  | 9   | 17  | 27  | 0.6897 | 0.3103 | 0.3864 | 0.6136 | -0.3033 | 0.4289 |
| Marker184391 | Chr6 | 8841215  | 8841460  | 1   | 5   | 4   | 6   | 0.1667 | 0.8333 | 0.4    | 0.6    | 0.2333  | 0.3299 |

|              |      |          |          |     |     |    |     |        |        |        |        |         |        |
|--------------|------|----------|----------|-----|-----|----|-----|--------|--------|--------|--------|---------|--------|
| Marker166348 | Chr6 | 8842053  | 8842342  | 52  | 33  | 20 | 44  | 0.6118 | 0.3882 | 0.3125 | 0.6875 | -0.2993 | 0.4233 |
| Marker163540 | Chr6 | 8842345  | 8842612  | 63  | 32  | 33 | 53  | 0.6632 | 0.3368 | 0.3837 | 0.6163 | -0.2795 | 0.3953 |
| Marker160025 | Chr6 | 8846509  | 8846784  | 53  | 15  | 37 | 10  | 0.7794 | 0.2206 | 0.7872 | 0.2128 | 0.0078  | 0.011  |
| Marker196132 | Chr6 | 8846787  | 8847057  | 39  | 33  | 16 | 29  | 0.5417 | 0.4583 | 0.3556 | 0.6444 | -0.1861 | 0.2632 |
| Marker170325 | Chr6 | 8857483  | 8857826  | 16  | 21  | 7  | 14  | 0.4324 | 0.5676 | 0.3333 | 0.6667 | -0.0991 | 0.1401 |
| Marker196670 | Chr6 | 8857829  | 8858192  | 10  | 6   | 3  | 9   | 0.625  | 0.375  | 0.25   | 0.75   | -0.375  | 0.5303 |
| Marker176012 | Chr6 | 8859340  | 8859651  | 56  | 44  | 11 | 52  | 0.56   | 0.44   | 0.1746 | 0.8254 | -0.3854 | 0.545  |
| Marker163301 | Chr6 | 8861769  | 8862041  | 51  | 47  | 23 | 56  | 0.5204 | 0.4796 | 0.2911 | 0.7089 | -0.2293 | 0.3243 |
| Marker152529 | Chr6 | 8863524  | 8863790  | 26  | 15  | 15 | 17  | 0.6341 | 0.3659 | 0.4688 | 0.5312 | -0.1653 | 0.2338 |
| Marker162518 | Chr6 | 8872021  | 8872306  | 24  | 21  | 14 | 15  | 0.5333 | 0.4667 | 0.4828 | 0.5172 | -0.0505 | 0.0714 |
| Marker159436 | Chr6 | 8872309  | 8872626  | 22  | 17  | 8  | 19  | 0.5641 | 0.4359 | 0.2963 | 0.7037 | -0.2678 | 0.3787 |
| Marker165133 | Chr6 | 8886686  | 8886967  | 27  | 37  | 18 | 24  | 0.4219 | 0.5781 | 0.4286 | 0.5714 | 0.0067  | 0.0095 |
| Marker186895 | Chr6 | 8941228  | 8941555  | 44  | 53  | 53 | 45  | 0.4536 | 0.5464 | 0.5408 | 0.4592 | 0.0872  | 0.1233 |
| Marker154338 | Chr6 | 8959833  | 8960201  | 15  | 8   | 6  | 10  | 0.6522 | 0.3478 | 0.375  | 0.625  | -0.2772 | 0.392  |
| Marker164120 | Chr6 | 8960204  | 8960516  | 110 | 61  | 48 | 67  | 0.6433 | 0.3567 | 0.4174 | 0.5826 | -0.2259 | 0.3195 |
| Marker180322 | Chr6 | 8966783  | 8967082  | 30  | 49  | 14 | 30  | 0.3797 | 0.6203 | 0.3182 | 0.6818 | -0.0615 | 0.087  |
| Marker150947 | Chr6 | 8968217  | 8968551  | 83  | 51  | 42 | 91  | 0.6194 | 0.3806 | 0.3158 | 0.6842 | -0.3036 | 0.4294 |
| Marker182103 | Chr6 | 8984909  | 8985166  | 14  | 14  | 6  | 10  | 0.5    | 0.5    | 0.375  | 0.625  | -0.125  | 0.1768 |
| Marker193902 | Chr6 | 8985759  | 8986094  | 50  | 42  | 30 | 48  | 0.5435 | 0.4565 | 0.3846 | 0.6154 | -0.1589 | 0.2247 |
| Marker162023 | Chr6 | 8988149  | 8988473  | 98  | 89  | 63 | 109 | 0.5241 | 0.4759 | 0.3663 | 0.6337 | -0.1578 | 0.2232 |
| Marker156868 | Chr6 | 8996376  | 8996662  | 104 | 87  | 40 | 78  | 0.5445 | 0.4555 | 0.339  | 0.661  | -0.2055 | 0.2906 |
| Marker156185 | Chr6 | 8998367  | 8998645  | 53  | 45  | 33 | 41  | 0.5408 | 0.4592 | 0.4459 | 0.5541 | -0.0949 | 0.1342 |
| Marker193338 | Chr6 | 9003445  | 9003731  | 79  | 44  | 45 | 77  | 0.6423 | 0.3577 | 0.3689 | 0.6311 | -0.2734 | 0.3866 |
| Marker152610 | Chr6 | 9003734  | 9004049  | 19  | 25  | 9  | 20  | 0.4318 | 0.5682 | 0.3103 | 0.6897 | -0.1215 | 0.1718 |
| Marker158421 | Chr6 | 9005890  | 9006214  | 62  | 30  | 21 | 16  | 0.6739 | 0.3261 | 0.5676 | 0.4324 | -0.1063 | 0.1503 |
| Marker156220 | Chr6 | 9013637  | 9013918  | 58  | 54  | 18 | 38  | 0.5179 | 0.4821 | 0.3214 | 0.6786 | -0.1965 | 0.2779 |
| Marker165030 | Chr6 | 9016881  | 9017195  | 61  | 39  | 49 | 66  | 0.61   | 0.39   | 0.4261 | 0.5739 | -0.1839 | 0.2601 |
| Marker190989 | Chr6 | 9021591  | 9021880  | 171 | 113 | 98 | 161 | 0.6021 | 0.3979 | 0.3784 | 0.6216 | -0.2237 | 0.3164 |
| Marker179562 | Chr6 | 9022253  | 9022588  | 33  | 23  | 6  | 16  | 0.5893 | 0.4107 | 0.2727 | 0.7273 | -0.3166 | 0.4477 |
| Marker191288 | Chr6 | 9086888  | 9087223  | 32  | 20  | 17 | 28  | 0.6154 | 0.3846 | 0.3778 | 0.6222 | -0.2376 | 0.336  |
| Marker152059 | Chr6 | 9335163  | 9335451  | 37  | 28  | 33 | 35  | 0.5692 | 0.4308 | 0.4853 | 0.5147 | -0.0839 | 0.1187 |
| Marker181044 | Chr6 | 9386757  | 9387047  | 36  | 38  | 22 | 21  | 0.4865 | 0.5135 | 0.5116 | 0.4884 | 0.0251  | 0.0355 |
| Marker187714 | Chr6 | 9476206  | 9476423  | 8   | 4   | 7  | 6   | 0.6667 | 0.3333 | 0.5385 | 0.4615 | -0.1282 | 0.1813 |
| Marker178233 | Chr6 | 9641540  | 9641838  | 52  | 19  | 22 | 28  | 0.7324 | 0.2676 | 0.44   | 0.56   | -0.2924 | 0.4135 |
| Marker192740 | Chr6 | 9641907  | 9642127  | 15  | 7   | 6  | 12  | 0.6818 | 0.3182 | 0.3333 | 0.6667 | -0.3485 | 0.4929 |
| Marker176639 | Chr6 | 9718615  | 9718943  | 62  | 35  | 48 | 48  | 0.6392 | 0.3608 | 0.5    | 0.5    | -0.1392 | 0.1969 |
| Marker183616 | Chr6 | 9817858  | 9818179  | 20  | 8   | 15 | 7   | 0.7143 | 0.2857 | 0.6818 | 0.3182 | -0.0325 | 0.046  |
| Marker155303 | Chr6 | 10019652 | 10019967 | 55  | 31  | 31 | 35  | 0.6395 | 0.3605 | 0.4697 | 0.5303 | -0.1698 | 0.2401 |
| Marker187370 | Chr6 | 10034916 | 10035241 | 54  | 17  | 20 | 22  | 0.7606 | 0.2394 | 0.4762 | 0.5238 | -0.2844 | 0.4022 |
| Marker180806 | Chr6 | 10037117 | 10037416 | 48  | 18  | 19 | 19  | 0.7273 | 0.2727 | 0.5    | 0.5    | -0.2273 | 0.3215 |
| Marker176130 | Chr6 | 10042838 | 10043145 | 28  | 42  | 15 | 78  | 0.4    | 0.6    | 0.1613 | 0.8387 | -0.2387 | 0.3376 |
| Marker194579 | Chr6 | 10170810 | 10171105 | 15  | 30  | 47 | 30  | 0.3333 | 0.6667 | 0.6104 | 0.3896 | 0.2771  | 0.3919 |
| Marker187738 | Chr6 | 10199430 | 10199685 | 10  | 13  | 6  | 6   | 0.4348 | 0.5652 | 0.5    | 0.5    | 0.0652  | 0.0922 |
| Marker195133 | Chr6 | 10208204 | 10208479 | 73  | 31  | 47 | 53  | 0.7019 | 0.2981 | 0.47   | 0.53   | -0.2319 | 0.328  |
| Marker166220 | Chr6 | 10338478 | 10338719 | 11  | 2   | 8  | 6   | 0.8462 | 0.1538 | 0.5714 | 0.4286 | -0.2748 | 0.3886 |
| Marker169442 | Chr6 | 10377156 | 10377461 | 79  | 55  | 59 | 70  | 0.5896 | 0.4104 | 0.4574 | 0.5426 | -0.1322 | 0.187  |
| Marker166959 | Chr6 | 10421759 | 10422086 | 13  | 9   | 9  | 6   | 0.5909 | 0.4091 | 0.6    | 0.4    | 0.0091  | 0.0129 |
| Marker189153 | Chr6 | 10456981 | 10457296 | 38  | 15  | 7  | 20  | 0.717  | 0.283  | 0.2593 | 0.7407 | -0.4577 | 0.6473 |
| Marker163482 | Chr6 | 10531267 | 10531514 | 5   | 7   | 4  | 0   | 0.4167 | 0.5833 | 1      | 0      | 0.5833  | 0.8249 |
| Marker184183 | Chr6 | 10672627 | 10672895 | 25  | 8   | 29 | 9   | 0.7576 | 0.2424 | 0.7632 | 0.2368 | 0.0056  | 0.0079 |
| Marker190142 | Chr6 | 10793542 | 10793819 | 48  | 47  | 33 | 63  | 0.5053 | 0.4947 | 0.3438 | 0.6562 | -0.1615 | 0.2284 |
| Marker178033 | Chr6 | 10801510 | 10801829 | 19  | 19  | 9  | 12  | 0.5    | 0.5    | 0.4286 | 0.5714 | -0.0714 | 0.101  |
| Marker184857 | Chr6 | 10803455 | 10803764 | 27  | 22  | 15 | 33  | 0.551  | 0.449  | 0.3125 | 0.6875 | -0.2385 | 0.3373 |
| Marker179916 | Chr6 | 10810058 | 10810396 | 39  | 29  | 15 | 18  | 0.5735 | 0.4265 | 0.4545 | 0.5455 | -0.119  | 0.1683 |
| Marker174280 | Chr6 | 10810399 | 10810728 | 45  | 20  | 9  | 36  | 0.6923 | 0.3077 | 0.2    | 0.8    | -0.4923 | 0.6962 |
| Marker169570 | Chr6 | 10828322 | 10828571 | 9   | 6   | 8  | 8   | 0.6    | 0.4    | 0.5    | 0.5    | -0.1    | 0.1414 |
| Marker183594 | Chr6 | 10912387 | 10912738 | 22  | 14  | 5  | 18  | 0.6111 | 0.3889 | 0.2174 | 0.7826 | -0.3937 | 0.5568 |
| Marker190018 | Chr6 | 10935222 | 10935504 | 42  | 46  | 41 | 32  | 0.4773 | 0.5227 | 0.5616 | 0.4384 | 0.0843  | 0.1192 |
| Marker165163 | Chr6 | 11046477 | 11046477 | 17  | 7   | 18 | 2   | 0.7083 | 0.2917 | 0.9    | 0.1    | 0.1917  | 0.2711 |
| Marker185409 | Chr6 | 11081711 | 11082061 | 44  | 24  | 22 | 41  | 0.6471 | 0.3529 | 0.3492 | 0.6508 | -0.2979 | 0.4213 |
| Marker180026 | Chr6 | 11083730 | 11084086 | 23  | 9   | 15 | 19  | 0.7188 | 0.2812 | 0.4412 | 0.5588 | -0.2776 | 0.3926 |
| Marker159234 | Chr6 | 11097849 | 11098212 | 21  | 12  | 4  | 25  | 0.6364 | 0.3636 | 0.1379 | 0.8621 | -0.4985 | 0.705  |
| Marker161402 | Chr6 | 11103485 | 11103729 | 21  | 12  | 8  | 12  | 0.6364 | 0.3636 | 0.4    | 0.6    | -0.2364 | 0.3343 |
| Marker194903 | Chr6 | 11113549 | 11113887 | 22  | 20  | 13 | 24  | 0.5238 | 0.4762 | 0.3514 | 0.6486 | -0.1724 | 0.2438 |
| Marker154551 | Chr6 | 11125210 | 11125488 | 45  | 43  | 24 | 48  | 0.5114 | 0.4886 | 0.3333 | 0.6667 | -0.1781 | 0.2519 |
| Marker187886 | Chr6 | 11164171 | 11164429 | 16  | 11  | 2  | 10  | 0.5926 | 0.4074 | 0.1667 | 0.8333 | -0.4259 | 0.6023 |
| Marker151997 | Chr6 | 11178614 | 11178973 | 31  | 7   | 19 | 12  | 0.8158 | 0.1842 | 0.6129 | 0.3871 | -0.2029 | 0.2869 |
| Marker164340 | Chr6 | 11183314 | 11183682 | 5   | 3   | 4  | 12  | 0.625  | 0.375  | 0.25   | 0.75   | -0.375  | 0.5303 |
| Marker160648 | Chr6 | 11194196 | 11194436 | 5   | 5   | 3  | 7   | 0.5    | 0.5    | 0.3    | 0.7    | -0.2    | 0.2828 |
| Marker184339 | Chr6 | 11194439 | 11194721 | 28  | 31  | 20 | 20  | 0.4746 | 0.5254 | 0.5    | 0.5    | 0.0254  | 0.0359 |
| Marker163012 | Chr6 | 11194724 | 11195045 | 52  | 58  | 26 | 46  | 0.4727 | 0.5273 | 0.3611 | 0.6389 | -0.1116 | 0.1578 |
| Marker166097 | Chr6 | 11195048 | 11195357 | 47  | 34  | 33 | 29  | 0.5802 | 0.4198 | 0.5323 | 0.4677 | -0.0479 | 0.0677 |
| Marker173950 | Chr6 | 11195360 | 11195649 | 105 | 90  | 67 | 85  | 0.5385 | 0.4615 | 0.4408 | 0.5592 | -0.0977 | 0.1382 |
| Marker167883 | Chr6 | 11195652 | 11195964 | 50  | 27  | 35 | 38  | 0.6494 | 0.3506 | 0.4795 | 0.5205 | -0.1699 | 0.2403 |
| Marker183531 | Chr6 | 11213680 | 11213954 | 63  | 30  | 26 | 35  | 0.6774 | 0.3226 | 0.4262 | 0.5738 | -0.2512 | 0.3553 |
| Marker157839 | Chr6 | 11290430 | 11290766 | 26  | 4   | 18 | 14  | 0.8667 | 0.1333 | 0.5625 | 0.4375 | -0.3042 | 0.4302 |
| Marker191140 | Chr6 | 11369744 | 11370096 | 8   | 8   | 22 | 11  | 0.5    | 0.5    | 0.6667 | 0.3333 | 0.1667  | 0.2357 |
| Marker173313 | Chr6 | 11485254 | 11485601 | 130 | 74  | 91 | 92  | 0.6373 | 0.3627 | 0.4973 | 0.5027 | -0.14   | 0.198  |
| Marker190536 | Chr6 | 11512642 | 11512956 | 101 | 52  | 70 | 123 | 0.6601 | 0.3399 | 0.3627 | 0.6373 | -0.2974 | 0.4206 |
| Marker175959 | Chr6 | 11520727 | 11521043 | 29  | 30  | 18 | 43  | 0.4915 | 0.5085 | 0.2951 | 0.7049 | -0.1964 | 0.2778 |
| Marker181489 | Chr6 | 11549982 | 11550240 | 18  | 6   | 9  | 15  | 0.75   | 0.25   | 0.375  | 0.625  | -0.375  | 0.5303 |
| Marker192846 | Chr6 | 11556037 | 11556303 | 65  | 39  | 28 | 33  | 0.625  | 0.375  | 0.459  | 0.541  | -0.166  | 0.2348 |

|              |      |          |          |     |    |    |     |        |        |        |        |         |        |
|--------------|------|----------|----------|-----|----|----|-----|--------|--------|--------|--------|---------|--------|
| Marker191610 | Chr6 | 11556306 | 11556630 | 35  | 26 | 13 | 17  | 0.5738 | 0.4262 | 0.4333 | 0.5667 | -0.1405 | 0.1987 |
| Marker170280 | Chr6 | 11557057 | 11557327 | 44  | 24 | 24 | 43  | 0.6471 | 0.3529 | 0.3582 | 0.6418 | -0.2889 | 0.4086 |
| Marker170334 | Chr6 | 11567333 | 11567609 | 30  | 50 | 15 | 21  | 0.375  | 0.625  | 0.4167 | 0.5833 | 0.0417  | 0.059  |
| Marker178252 | Chr6 | 11572228 | 11572581 | 15  | 18 | 10 | 14  | 0.4545 | 0.5455 | 0.4167 | 0.5833 | -0.0378 | 0.0535 |
| Marker192275 | Chr6 | 11572584 | 11572946 | 13  | 11 | 8  | 8   | 0.5417 | 0.4583 | 0.5    | 0.5    | -0.0417 | 0.059  |
| Marker157415 | Chr6 | 11572949 | 11573240 | 33  | 22 | 17 | 24  | 0.6    | 0.4    | 0.4146 | 0.5854 | -0.1854 | 0.2622 |
| Marker165376 | Chr6 | 11576977 | 11577296 | 56  | 45 | 53 | 60  | 0.5545 | 0.4455 | 0.469  | 0.531  | -0.0855 | 0.1209 |
| Marker165286 | Chr6 | 11579231 | 11579579 | 27  | 18 | 14 | 16  | 0.6    | 0.4    | 0.4667 | 0.5333 | -0.1333 | 0.1885 |
| Marker189348 | Chr6 | 11589426 | 11589684 | 8   | 9  | 8  | 20  | 0.4706 | 0.5294 | 0.2857 | 0.7143 | -0.1849 | 0.2615 |
| Marker157380 | Chr6 | 11590634 | 11590958 | 17  | 34 | 10 | 27  | 0.3333 | 0.6667 | 0.2703 | 0.7297 | -0.063  | 0.0891 |
| Marker152347 | Chr6 | 11824948 | 11825232 | 85  | 46 | 45 | 71  | 0.6489 | 0.3511 | 0.3879 | 0.6121 | -0.261  | 0.3691 |
| Marker175291 | Chr6 | 11827227 | 11827552 | 82  | 40 | 38 | 40  | 0.6721 | 0.3279 | 0.4872 | 0.5128 | -0.1849 | 0.2615 |
| Marker159146 | Chr6 | 11878156 | 11878491 | 33  | 3  | 27 | 0   | 0.9167 | 0.0833 | 1      | 0      | 0.0833  | 0.1178 |
| Marker192472 | Chr6 | 11905359 | 11905635 | 32  | 7  | 22 | 3   | 0.8205 | 0.1795 | 0.88   | 0.12   | 0.0595  | 0.0841 |
| Marker194190 | Chr6 | 12089695 | 12089997 | 110 | 55 | 65 | 88  | 0.6667 | 0.3333 | 0.4248 | 0.5752 | -0.2419 | 0.3421 |
| Marker180052 | Chr6 | 12090139 | 12090442 | 39  | 18 | 22 | 33  | 0.6842 | 0.3158 | 0.4    | 0.6    | -0.2842 | 0.4019 |
| Marker161224 | Chr6 | 12198860 | 12199179 | 34  | 19 | 11 | 14  | 0.6415 | 0.3585 | 0.44   | 0.56   | -0.2015 | 0.285  |
| Marker180802 | Chr6 | 12209215 | 12209562 | 23  | 24 | 22 | 50  | 0.4894 | 0.5106 | 0.3056 | 0.6944 | -0.1838 | 0.2599 |
| Marker160216 | Chr6 | 12209565 | 12209852 | 96  | 60 | 35 | 60  | 0.6154 | 0.3846 | 0.3684 | 0.6316 | -0.247  | 0.3493 |
| Marker172246 | Chr6 | 12213343 | 12213654 | 20  | 21 | 16 | 33  | 0.4878 | 0.5122 | 0.3265 | 0.6735 | -0.1613 | 0.2281 |
| Marker193536 | Chr6 | 12217460 | 12217735 | 69  | 45 | 54 | 65  | 0.6053 | 0.3947 | 0.4538 | 0.5462 | -0.1515 | 0.2143 |
| Marker170098 | Chr6 | 12222305 | 12222661 | 13  | 1  | 3  | 7   | 0.9286 | 0.0714 | 0.3    | 0.7    | -0.6286 | 0.889  |
| Marker172814 | Chr6 | 12231548 | 12231889 | 39  | 13 | 24 | 29  | 0.75   | 0.25   | 0.4528 | 0.5472 | -0.2972 | 0.4203 |
| Marker153842 | Chr6 | 12392288 | 12392595 | 35  | 26 | 20 | 56  | 0.5738 | 0.4262 | 0.2632 | 0.7368 | -0.3106 | 0.4393 |
| Marker193557 | Chr6 | 13255851 | 13256017 | 12  | 1  | 1  | 7   | 0.9231 | 0.0769 | 0.125  | 0.875  | -0.7981 | 1.1287 |
| Marker186031 | Chr6 | 14493451 | 14493725 | 27  | 6  | 29 | 22  | 0.8182 | 0.1818 | 0.5686 | 0.4314 | -0.2496 | 0.353  |
| Marker167542 | Chr6 | 14508069 | 14508338 | 43  | 19 | 15 | 13  | 0.6935 | 0.3065 | 0.5357 | 0.4643 | -0.1578 | 0.2232 |
| Marker179630 | Chr6 | 15194098 | 15194392 | 62  | 38 | 31 | 58  | 0.62   | 0.38   | 0.3483 | 0.6517 | -0.2717 | 0.3842 |
| Marker162859 | Chr6 | 15203851 | 15204177 | 47  | 26 | 27 | 40  | 0.6438 | 0.3562 | 0.403  | 0.597  | -0.2408 | 0.3405 |
| Marker162846 | Chr6 | 15261635 | 15261853 | 10  | 2  | 7  | 9   | 0.8333 | 0.1667 | 0.4375 | 0.5625 | -0.3958 | 0.5597 |
| Marker186657 | Chr6 | 15572108 | 15572394 | 63  | 55 | 48 | 102 | 0.5339 | 0.4661 | 0.32   | 0.68   | -0.2139 | 0.3025 |
| Marker184400 | Chr6 | 15629058 | 15629365 | 114 | 7  | 69 | 21  | 0.9421 | 0.0579 | 0.7667 | 0.2333 | -0.1754 | 0.2481 |
| Marker162186 | Chr6 | 15849312 | 15849670 | 40  | 7  | 6  | 17  | 0.8511 | 0.1489 | 0.2609 | 0.7391 | -0.5902 | 0.8347 |
| Marker193281 | Chr6 | 15860316 | 15860583 | 58  | 45 | 28 | 68  | 0.5631 | 0.4369 | 0.2917 | 0.7083 | -0.2714 | 0.3838 |
| Marker195803 | Chr6 | 15898588 | 15898871 | 61  | 36 | 49 | 60  | 0.6289 | 0.3711 | 0.4495 | 0.5505 | -0.1794 | 0.2537 |
| Marker197987 | Chr6 | 15938544 | 15938881 | 24  | 8  | 14 | 15  | 0.75   | 0.25   | 0.4828 | 0.5172 | -0.2672 | 0.3779 |
| Marker181416 | Chr6 | 16020992 | 16021343 | 33  | 2  | 5  | 5   | 0.9429 | 0.0571 | 0.5    | 0.5    | -0.4429 | 0.6264 |
| Marker189620 | Chr6 | 16049191 | 16049489 | 64  | 48 | 13 | 40  | 0.5714 | 0.4286 | 0.2453 | 0.7547 | -0.3261 | 0.4612 |
| Marker152467 | Chr6 | 16205507 | 16205763 | 26  | 3  | 17 | 5   | 0.8966 | 0.1034 | 0.0727 | 0.2273 | -0.1239 | 0.1752 |
| Marker163910 | Chr6 | 16734727 | 16735034 | 46  | 4  | 28 | 11  | 0.92   | 0.08   | 0.7179 | 0.2821 | -0.2021 | 0.2858 |
| Marker185635 | Chr6 | 16794482 | 16794766 | 32  | 29 | 24 | 39  | 0.5246 | 0.4754 | 0.381  | 0.619  | -0.1436 | 0.2031 |
| Marker191988 | Chr6 | 16798081 | 16798346 | 19  | 18 | 10 | 28  | 0.5135 | 0.4865 | 0.2632 | 0.7368 | -0.2503 | 0.354  |
| Marker159492 | Chr6 | 16971314 | 16971673 | 24  | 3  | 14 | 8   | 0.8889 | 0.1111 | 0.6364 | 0.3636 | -0.2525 | 0.3571 |
| Marker181485 | Chr6 | 17126041 | 17126397 | 23  | 5  | 17 | 24  | 0.8214 | 0.1786 | 0.4146 | 0.5854 | -0.4068 | 0.5753 |
| Marker181764 | Chr6 | 17127226 | 17127461 | 12  | 5  | 8  | 7   | 0.7059 | 0.2941 | 0.5333 | 0.4667 | -0.1726 | 0.2441 |
| Marker151783 | Chr6 | 17210710 | 17210924 | 11  | 7  | 7  | 3   | 0.6111 | 0.3889 | 0.7    | 0.3    | 0.0889  | 0.1257 |
| Marker179221 | Chr6 | 17233102 | 17233418 | 10  | 1  | 6  | 5   | 0.9091 | 0.0909 | 0.5455 | 0.4545 | -0.3636 | 0.5142 |
| Marker193042 | Chr6 | 17234717 | 17235071 | 30  | 23 | 15 | 16  | 0.566  | 0.434  | 0.4839 | 0.5161 | -0.0821 | 0.1161 |
| Marker194445 | Chr6 | 17235428 | 17235705 | 52  | 36 | 33 | 44  | 0.5909 | 0.4091 | 0.4286 | 0.5714 | -0.1623 | 0.2295 |
| Marker177978 | Chr6 | 17622196 | 17622522 | 28  | 12 | 10 | 23  | 0.7    | 0.3    | 0.303  | 0.697  | -0.397  | 0.5614 |
| Marker165699 | Chr6 | 17792543 | 17792800 | 33  | 3  | 12 | 5   | 0.9167 | 0.0833 | 0.7059 | 0.2941 | -0.2108 | 0.2981 |
| Marker159497 | Chr6 | 17826504 | 17826743 | 17  | 2  | 18 | 8   | 0.8947 | 0.1053 | 0.6923 | 0.3077 | -0.2024 | 0.2862 |
| Marker183906 | Chr6 | 17965657 | 17965945 | 78  | 30 | 53 | 71  | 0.7222 | 0.2778 | 0.4274 | 0.5726 | -0.2948 | 0.4169 |
| Marker165715 | Chr6 | 18085520 | 18085777 | 10  | 6  | 5  | 7   | 0.625  | 0.375  | 0.4167 | 0.5833 | -0.2083 | 0.2946 |
| Marker193017 | Chr6 | 18087868 | 18088156 | 54  | 3  | 52 | 22  | 0.9474 | 0.0526 | 0.7027 | 0.2973 | -0.2447 | 0.3461 |
| Marker164365 | Chr6 | 18249928 | 18250690 | 15  | 4  | 6  | 4   | 0.7895 | 0.2105 | 0.6    | 0.4    | -0.1895 | 0.268  |
| Marker172217 | Chr6 | 18261744 | 18262005 | 12  | 10 | 11 | 10  | 0.5455 | 0.4545 | 0.5238 | 0.4762 | -0.0217 | 0.0307 |
| Marker167924 | Chr6 | 18384375 | 18384670 | 26  | 10 | 16 | 7   | 0.7222 | 0.2778 | 0.6957 | 0.3043 | -0.0265 | 0.0375 |
| Marker189117 | Chr6 | 18389531 | 18389796 | 20  | 3  | 6  | 12  | 0.8696 | 0.1304 | 0.3333 | 0.6667 | -0.5363 | 0.7584 |
| Marker170287 | Chr6 | 18505324 | 18505617 | 53  | 22 | 25 | 20  | 0.7067 | 0.2933 | 0.5556 | 0.4444 | -0.1511 | 0.2137 |
| Marker190868 | Chr6 | 18510477 | 18510738 | 23  | 1  | 16 | 10  | 0.9583 | 0.0417 | 0.6154 | 0.3846 | -0.3429 | 0.4849 |
| Marker153600 | Chr6 | 18519838 | 18520101 | 32  | 2  | 15 | 18  | 0.9412 | 0.0588 | 0.4545 | 0.5455 | -0.4867 | 0.6883 |
| Marker185545 | Chr6 | 18672504 | 18672852 | 27  | 6  | 4  | 29  | 0.8182 | 0.1818 | 0.1212 | 0.8788 | -0.697  | 0.9857 |
| Marker157461 | Chr6 | 18675815 | 18676178 | 18  | 10 | 8  | 14  | 0.6429 | 0.3571 | 0.3636 | 0.6364 | -0.2793 | 0.395  |
| Marker154169 | Chr6 | 18684124 | 18684457 | 37  | 7  | 15 | 25  | 0.8409 | 0.1591 | 0.375  | 0.625  | -0.4659 | 0.6589 |
| Marker194631 | Chr6 | 18686001 | 18686280 | 78  | 14 | 25 | 32  | 0.8478 | 0.1522 | 0.4386 | 0.5614 | -0.4092 | 0.5787 |
| Marker174024 | Chr6 | 18688623 | 18688966 | 39  | 25 | 32 | 40  | 0.6094 | 0.3906 | 0.4444 | 0.5556 | -0.165  | 0.2333 |
| Marker186302 | Chr6 | 18691139 | 18691445 | 42  | 27 | 19 | 37  | 0.6087 | 0.3913 | 0.3393 | 0.6607 | -0.2694 | 0.381  |
| Marker156339 | Chr6 | 18728109 | 18728297 | 7   | 4  | 5  | 12  | 0.6364 | 0.3636 | 0.2941 | 0.7059 | -0.3423 | 0.4841 |
| Marker187414 | Chr6 | 18729639 | 18729915 | 29  | 15 | 11 | 24  | 0.6591 | 0.3409 | 0.3143 | 0.6857 | -0.3448 | 0.4876 |
| Marker196217 | Chr6 | 18729918 | 18730141 | 9   | 4  | 4  | 8   | 0.6923 | 0.3077 | 0.3333 | 0.6667 | -0.359  | 0.5077 |
| Marker162554 | Chr6 | 18730144 | 18730507 | 10  | 8  | 8  | 11  | 0.5556 | 0.4444 | 0.4211 | 0.5789 | -0.1345 | 0.1902 |
| Marker165118 | Chr6 | 18731525 | 18731825 | 76  | 31 | 30 | 62  | 0.7103 | 0.2897 | 0.3261 | 0.6739 | -0.3842 | 0.5433 |
| Marker154117 | Chr6 | 18787457 | 18787809 | 21  | 3  | 5  | 12  | 0.875  | 0.125  | 0.2941 | 0.7059 | -0.5809 | 0.8215 |
| Marker171974 | Chr6 | 18942818 | 18943150 | 40  | 7  | 16 | 29  | 0.8511 | 0.1489 | 0.3556 | 0.6444 | -0.4955 | 0.7007 |
| Marker168059 | Chr6 | 18943153 | 18943428 | 69  | 49 | 47 | 59  | 0.5847 | 0.4153 | 0.4434 | 0.5566 | -0.1413 | 0.1998 |
| Marker157006 | Chr6 | 18946372 | 18946701 | 55  | 15 | 18 | 42  | 0.7857 | 0.2143 | 0.3    | 0.7    | -0.4857 | 0.6869 |
| Marker165365 | Chr6 | 18950244 | 18950590 | 48  | 15 | 20 | 27  | 0.7619 | 0.2381 | 0.4255 | 0.5745 | -0.3364 | 0.4757 |
| Marker191246 | Chr6 | 18950593 | 18950947 | 42  | 22 | 15 | 26  | 0.6562 | 0.3438 | 0.3659 | 0.6341 | -0.2903 | 0.4105 |
| Marker196590 | Chr6 | 18957334 | 18957618 | 33  | 15 | 14 | 38  | 0.6875 | 0.3125 | 0.2692 | 0.7308 | -0.4183 | 0.5916 |
| Marker174758 | Chr6 | 18963265 | 18963531 | 34  | 26 | 14 | 27  | 0.5667 | 0.4333 | 0.3415 | 0.6585 | -0.2252 | 0.3185 |
| Marker172412 | Chr6 | 19376281 | 19376593 | 97  | 34 | 41 | 61  | 0.7405 | 0.2595 | 0.402  | 0.598  | -0.3385 | 0.4787 |



|              |      |          |          |     |    |    |     |        |        |        |        |         |        |
|--------------|------|----------|----------|-----|----|----|-----|--------|--------|--------|--------|---------|--------|
| Marker156614 | Chr6 | 19919867 | 19920126 | 13  | 6  | 4  | 11  | 0.6842 | 0.3158 | 0.2667 | 0.7333 | -0.4175 | 0.5904 |
| Marker171230 | Chr6 | 19920281 | 19920544 | 29  | 11 | 24 | 24  | 0.725  | 0.275  | 0.5    | 0.5    | -0.225  | 0.3182 |
| Marker176335 | Chr6 | 19920547 | 19920875 | 44  | 25 | 34 | 35  | 0.6377 | 0.3623 | 0.4928 | 0.5072 | -0.1449 | 0.2049 |
| Marker161466 | Chr6 | 19924806 | 19925115 | 24  | 17 | 23 | 18  | 0.5854 | 0.4146 | 0.561  | 0.439  | -0.0244 | 0.0345 |
| Marker189676 | Chr6 | 19963914 | 19964179 | 22  | 14 | 18 | 23  | 0.6111 | 0.3889 | 0.439  | 0.561  | -0.1721 | 0.2434 |
| Marker185271 | Chr6 | 19964720 | 19965018 | 54  | 55 | 25 | 36  | 0.4954 | 0.5046 | 0.4098 | 0.5902 | -0.0856 | 0.1211 |
| Marker172488 | Chr6 | 20027553 | 20027918 | 14  | 7  | 9  | 7   | 0.6667 | 0.3333 | 0.5625 | 0.4375 | -0.1042 | 0.1474 |
| Marker182061 | Chr6 | 20150528 | 20150846 | 52  | 39 | 26 | 32  | 0.5714 | 0.4286 | 0.4483 | 0.5517 | -0.1231 | 0.1741 |
| Marker172241 | Chr6 | 20727283 | 20727528 | 12  | 8  | 5  | 7   | 0.6    | 0.4    | 0.4167 | 0.5833 | -0.1833 | 0.2592 |
| Marker155848 | Chr6 | 20877310 | 20877647 | 51  | 26 | 29 | 33  | 0.6623 | 0.3377 | 0.4677 | 0.5323 | -0.1946 | 0.2752 |
| Marker196778 | Chr6 | 21162475 | 21162756 | 39  | 24 | 27 | 23  | 0.619  | 0.381  | 0.54   | 0.46   | -0.079  | 0.1117 |
| Marker186312 | Chr6 | 21373707 | 21373972 | 13  | 11 | 9  | 20  | 0.5417 | 0.4583 | 0.3103 | 0.6897 | -0.2314 | 0.3272 |
| Marker151554 | Chr6 | 21443288 | 21443567 | 83  | 32 | 55 | 54  | 0.7217 | 0.2783 | 0.5046 | 0.4954 | -0.2171 | 0.307  |
| Marker160494 | Chr6 | 21445252 | 21445466 | 14  | 3  | 6  | 4   | 0.8235 | 0.1765 | 0.6    | 0.4    | -0.2235 | 0.3161 |
| Marker177088 | Chr6 | 21467074 | 21467415 | 27  | 9  | 12 | 15  | 0.75   | 0.25   | 0.4444 | 0.5556 | -0.3056 | 0.4322 |
| Marker185938 | Chr6 | 21467418 | 21467711 | 44  | 29 | 25 | 47  | 0.6027 | 0.3973 | 0.3472 | 0.6528 | -0.2555 | 0.3613 |
| Marker164219 | Chr6 | 21474713 | 21475051 | 45  | 27 | 16 | 42  | 0.625  | 0.375  | 0.2759 | 0.7241 | -0.3491 | 0.4937 |
| Marker162721 | Chr6 | 21490449 | 21490783 | 63  | 25 | 23 | 34  | 0.7159 | 0.2841 | 0.4035 | 0.5965 | -0.3124 | 0.4418 |
| Marker196958 | Chr6 | 21491887 | 21492152 | 22  | 12 | 23 | 24  | 0.6471 | 0.3529 | 0.4894 | 0.5106 | -0.1577 | 0.223  |
| Marker162251 | Chr6 | 21511333 | 21511604 | 42  | 14 | 19 | 29  | 0.75   | 0.25   | 0.3958 | 0.6042 | -0.3542 | 0.5009 |
| Marker169535 | Chr6 | 21511607 | 21511901 | 16  | 20 | 6  | 17  | 0.4444 | 0.5556 | 0.2609 | 0.7391 | -0.1835 | 0.2595 |
| Marker193703 | Chr6 | 21828472 | 21828806 | 39  | 8  | 41 | 20  | 0.8298 | 0.1702 | 0.6721 | 0.3279 | -0.1577 | 0.223  |
| Marker152210 | Chr6 | 22097975 | 22098298 | 6   | 9  | 4  | 5   | 0.4    | 0.6    | 0.4444 | 0.5556 | 0.0444  | 0.0628 |
| Marker195264 | Chr6 | 22122031 | 22122380 | 21  | 12 | 12 | 20  | 0.6364 | 0.3636 | 0.375  | 0.625  | -0.2614 | 0.3697 |
| Marker158517 | Chr6 | 22124593 | 22124845 | 10  | 4  | 2  | 5   | 0.7143 | 0.2857 | 0.2857 | 0.7143 | -0.4286 | 0.6061 |
| Marker153714 | Chr6 | 22156025 | 22156337 | 77  | 53 | 34 | 70  | 0.5923 | 0.4077 | 0.3269 | 0.6731 | -0.2654 | 0.3753 |
| Marker162222 | Chr6 | 22159304 | 22159594 | 7   | 11 | 16 | 28  | 0.3889 | 0.6111 | 0.3636 | 0.6364 | -0.0253 | 0.0358 |
| Marker193560 | Chr6 | 22175307 | 22175657 | 52  | 19 | 44 | 39  | 0.7324 | 0.2676 | 0.5301 | 0.4699 | -0.2023 | 0.2861 |
| Marker177086 | Chr6 | 22178852 | 22179098 | 17  | 4  | 3  | 9   | 0.8095 | 0.1905 | 0.25   | 0.75   | -0.5595 | 0.7913 |
| Marker155861 | Chr6 | 22190492 | 22190755 | 20  | 4  | 9  | 13  | 0.8333 | 0.1667 | 0.4091 | 0.5909 | -0.4242 | 0.5999 |
| Marker160359 | Chr6 | 22226039 | 22226297 | 30  | 13 | 15 | 22  | 0.6977 | 0.3023 | 0.4054 | 0.5946 | -0.2923 | 0.4134 |
| Marker190457 | Chr6 | 22233952 | 22234264 | 68  | 25 | 17 | 38  | 0.7312 | 0.2688 | 0.3091 | 0.6909 | -0.4221 | 0.5969 |
| Marker153771 | Chr6 | 22234440 | 22234704 | 134 | 77 | 60 | 88  | 0.6351 | 0.3649 | 0.4054 | 0.5946 | -0.2297 | 0.3248 |
| Marker161754 | Chr6 | 22235639 | 22235966 | 64  | 52 | 60 | 68  | 0.5517 | 0.4483 | 0.4688 | 0.5312 | -0.0829 | 0.1172 |
| Marker178698 | Chr6 | 22244525 | 22244879 | 32  | 12 | 11 | 10  | 0.7273 | 0.2727 | 0.5238 | 0.4762 | -0.2035 | 0.2878 |
| Marker191826 | Chr6 | 22631259 | 22631536 | 37  | 11 | 35 | 24  | 0.7708 | 0.2292 | 0.5932 | 0.4068 | -0.1776 | 0.2512 |
| Marker179998 | Chr6 | 22640454 | 22640780 | 40  | 1  | 28 | 10  | 0.9756 | 0.0244 | 0.7368 | 0.2632 | -0.2388 | 0.3377 |
| Marker157472 | Chr6 | 22660570 | 22660818 | 18  | 4  | 7  | 6   | 0.8182 | 0.1818 | 0.5385 | 0.4615 | -0.2797 | 0.3956 |
| Marker170253 | Chr6 | 22684711 | 22684991 | 52  | 13 | 20 | 24  | 0.8    | 0.2    | 0.4545 | 0.5455 | -0.3455 | 0.4886 |
| Marker195805 | Chr6 | 22688120 | 22688406 | 85  | 28 | 29 | 55  | 0.7522 | 0.2478 | 0.3452 | 0.6548 | -0.407  | 0.5756 |
| Marker153758 | Chr6 | 22712492 | 22712766 | 46  | 20 | 40 | 30  | 0.697  | 0.303  | 0.5714 | 0.4286 | -0.1256 | 0.1776 |
| Marker151787 | Chr6 | 22712769 | 22713086 | 47  | 29 | 32 | 43  | 0.6184 | 0.3816 | 0.4267 | 0.5733 | -0.1917 | 0.2711 |
| Marker194267 | Chr6 | 22715154 | 22715419 | 54  | 22 | 25 | 34  | 0.7105 | 0.2895 | 0.4237 | 0.5763 | -0.2868 | 0.4056 |
| Marker165984 | Chr6 | 22721568 | 22721910 | 61  | 25 | 38 | 33  | 0.7093 | 0.2907 | 0.5352 | 0.4648 | -0.1741 | 0.2462 |
| Marker190433 | Chr6 | 22739056 | 22739329 | 59  | 16 | 24 | 46  | 0.7867 | 0.2133 | 0.3429 | 0.6571 | -0.4438 | 0.6276 |
| Marker196047 | Chr6 | 22769453 | 22769783 | 34  | 1  | 22 | 2   | 0.9714 | 0.0286 | 0.9167 | 0.0833 | -0.0547 | 0.0774 |
| Marker168042 | Chr6 | 22922679 | 22922978 | 42  | 39 | 12 | 14  | 0.5185 | 0.4815 | 0.4615 | 0.5385 | -0.057  | 0.0806 |
| Marker194646 | Chr6 | 22924100 | 22924386 | 144 | 84 | 70 | 101 | 0.6316 | 0.3684 | 0.4094 | 0.5906 | -0.2222 | 0.3142 |
| Marker181703 | Chr6 | 22931859 | 22932207 | 13  | 8  | 5  | 5   | 0.619  | 0.381  | 0.5    | 0.5    | -0.119  | 0.1683 |
| Marker166173 | Chr6 | 23649665 | 23649950 | 21  | 16 | 17 | 12  | 0.5676 | 0.4324 | 0.5862 | 0.4138 | 0.0186  | 0.0263 |
| Marker166911 | Chr6 | 23683172 | 23683449 | 35  | 14 | 11 | 15  | 0.7143 | 0.2857 | 0.4231 | 0.5769 | -0.2912 | 0.4118 |
| Marker156123 | Chr6 | 23685887 | 23686175 | 102 | 41 | 43 | 55  | 0.7133 | 0.2867 | 0.4388 | 0.5612 | -0.2745 | 0.3882 |
| Marker155983 | Chr6 | 23780140 | 23780386 | 13  | 6  | 10 | 5   | 0.6842 | 0.3158 | 0.6667 | 0.3333 | -0.0175 | 0.0247 |
| Marker158302 | Chr6 | 23819911 | 23820172 | 17  | 2  | 15 | 12  | 0.8947 | 0.1053 | 0.5556 | 0.4444 | -0.3391 | 0.4796 |
| Marker158498 | Chr6 | 23831914 | 23832207 | 84  | 43 | 41 | 43  | 0.6614 | 0.3386 | 0.4881 | 0.5119 | -0.1733 | 0.2451 |
| Marker189598 | Chr6 | 23866889 | 23867221 | 32  | 9  | 8  | 16  | 0.7805 | 0.2195 | 0.3333 | 0.6667 | -0.4472 | 0.6324 |
| Marker164686 | Chr6 | 23875056 | 23875337 | 80  | 28 | 34 | 61  | 0.7407 | 0.2593 | 0.3579 | 0.6421 | -0.3828 | 0.5414 |
| Marker179179 | Chr6 | 23878410 | 23878705 | 156 | 54 | 72 | 116 | 0.7429 | 0.2571 | 0.383  | 0.617  | -0.3599 | 0.509  |
| Marker150918 | Chr6 | 23881594 | 23881855 | 37  | 16 | 29 | 38  | 0.6981 | 0.3019 | 0.4328 | 0.5672 | -0.2653 | 0.3752 |
| Marker181039 | Chr6 | 23893009 | 23893340 | 35  | 8  | 14 | 7   | 0.814  | 0.186  | 0.6667 | 0.3333 | -0.1473 | 0.2083 |
| Marker188479 | Chr6 | 24008539 | 24008872 | 26  | 16 | 5  | 22  | 0.619  | 0.381  | 0.1852 | 0.8148 | -0.4338 | 0.6135 |
| Marker194990 | Chr6 | 24271782 | 24272145 | 25  | 17 | 17 | 21  | 0.5952 | 0.4048 | 0.4474 | 0.5526 | -0.1478 | 0.209  |
| Marker155730 | Chr6 | 24390396 | 24390726 | 45  | 20 | 15 | 9   | 0.6923 | 0.3077 | 0.625  | 0.375  | -0.0673 | 0.0952 |
| Marker196112 | Chr6 | 24398485 | 24398832 | 23  | 6  | 8  | 3   | 0.7931 | 0.2069 | 0.7273 | 0.2727 | -0.0658 | 0.0931 |
| Marker184943 | Chr6 | 25160464 | 25160809 | 77  | 25 | 39 | 40  | 0.7549 | 0.2451 | 0.4937 | 0.5063 | -0.2612 | 0.3694 |
| Marker152909 | Chr6 | 25162658 | 25162923 | 34  | 37 | 27 | 34  | 0.4789 | 0.5211 | 0.4426 | 0.5574 | -0.0363 | 0.0513 |
| Marker168750 | Chr6 | 25170110 | 25170436 | 45  | 30 | 28 | 48  | 0.6    | 0.4    | 0.3684 | 0.6316 | -0.2316 | 0.3275 |
| Marker168134 | Chr6 | 25190529 | 25190768 | 13  | 6  | 5  | 13  | 0.6842 | 0.3158 | 0.2778 | 0.7222 | -0.4064 | 0.5747 |
| Marker187234 | Chr6 | 25190906 | 25191258 | 35  | 37 | 23 | 42  | 0.4861 | 0.5139 | 0.3538 | 0.6462 | -0.1323 | 0.1871 |
| Marker189015 | Chr6 | 25276825 | 25277180 | 5   | 5  | 6  | 6   | 0.5    | 0.5    | 0.5    | 0.5    | 0       | 0      |
| Marker161801 | Chr6 | 25701422 | 25701727 | 26  | 19 | 20 | 18  | 0.5778 | 0.4222 | 0.5263 | 0.4737 | -0.0515 | 0.0728 |
| Marker185332 | Chr6 | 25723204 | 25723451 | 7   | 5  | 3  | 2   | 0.5833 | 0.4167 | 0.6    | 0.4    | 0.0167  | 0.0236 |
| Marker152916 | Chr6 | 26110181 | 26110439 | 47  | 6  | 29 | 3   | 0.8868 | 0.1132 | 0.9062 | 0.0938 | 0.0194  | 0.0274 |
| Marker169555 | Chr6 | 26132723 | 26132995 | 46  | 3  | 33 | 11  | 0.9388 | 0.0612 | 0.75   | 0.25   | -0.1888 | 0.267  |
| Marker183460 | Chr6 | 26140813 | 26141167 | 37  | 3  | 23 | 5   | 0.925  | 0.075  | 0.8214 | 0.1786 | -0.1036 | 0.1465 |
| Marker191494 | Chr6 | 26495721 | 26496086 | 20  | 3  | 22 | 3   | 0.8696 | 0.1304 | 0.88   | 0.12   | 0.0104  | 0.0147 |
| Marker173688 | Chr6 | 26960887 | 26961115 | 14  | 10 | 8  | 9   | 0.5833 | 0.4167 | 0.4706 | 0.5294 | -0.1127 | 0.1594 |
| Marker184945 | Chr6 | 26965140 | 26965408 | 34  | 17 | 12 | 9   | 0.6667 | 0.3333 | 0.5714 | 0.4286 | -0.0953 | 0.1348 |
| Marker158260 | Chr6 | 27027800 | 27028110 | 33  | 33 | 15 | 24  | 0.5    | 0.5    | 0.3846 | 0.6154 | -0.1154 | 0.1632 |
| Marker164601 | Chr6 | 27469725 | 27470043 | 23  | 15 | 20 | 20  | 0.6053 | 0.3947 | 0.5    | 0.5    | -0.1053 | 0.1489 |
| Marker161370 | Chr6 | 27688042 | 27688333 | 34  | 37 | 10 | 22  | 0.4789 | 0.5211 | 0.3125 | 0.6875 | -0.1664 | 0.2353 |
| Marker197478 | Chr6 | 27973777 | 27974038 | 16  | 15 | 10 | 18  | 0.5161 | 0.4839 | 0.3571 | 0.6429 | -0.159  | 0.2249 |

|              |      |          |          |    |     |    |     |        |        |        |        |         |        |
|--------------|------|----------|----------|----|-----|----|-----|--------|--------|--------|--------|---------|--------|
| Marker185391 | Chr6 | 28008906 | 28009168 | 23 | 12  | 9  | 13  | 0.6571 | 0.3429 | 0.4091 | 0.5909 | -0.248  | 0.3507 |
| Marker176383 | Chr6 | 28090864 | 28091176 | 17 | 13  | 16 | 18  | 0.5667 | 0.4333 | 0.4706 | 0.5294 | -0.0961 | 0.1359 |
| Marker178443 | Chr6 | 28145934 | 28146251 | 70 | 60  | 32 | 48  | 0.5385 | 0.4615 | 0.4    | 0.6    | -0.1385 | 0.1959 |
| Marker154578 | Chr6 | 28227779 | 28228133 | 53 | 4   | 39 | 6   | 0.9298 | 0.0702 | 0.8667 | 0.1333 | -0.0631 | 0.0892 |
| Marker205607 | Chr7 | 134154   | 134419   | 17 | 18  | 8  | 11  | 0.4857 | 0.5143 | 0.4211 | 0.5789 | -0.0646 | 0.0914 |
| Marker206157 | Chr7 | 241606   | 241849   | 9  | 18  | 5  | 9   | 0.3333 | 0.6667 | 0.3571 | 0.6429 | 0.0238  | 0.0337 |
| Marker206840 | Chr7 | 276487   | 276780   | 36 | 42  | 26 | 25  | 0.4615 | 0.5385 | 0.5098 | 0.4902 | 0.0483  | 0.0683 |
| Marker220992 | Chr7 | 291816   | 292116   | 47 | 20  | 28 | 18  | 0.7015 | 0.2985 | 0.6087 | 0.3913 | -0.0928 | 0.1312 |
| Marker220917 | Chr7 | 296473   | 296716   | 16 | 10  | 14 | 17  | 0.6154 | 0.3846 | 0.4516 | 0.5484 | -0.1638 | 0.2316 |
| Marker218774 | Chr7 | 471730   | 472076   | 11 | 10  | 11 | 14  | 0.5238 | 0.4762 | 0.44   | 0.56   | -0.0838 | 0.1185 |
| Marker227206 | Chr7 | 564935   | 565275   | 19 | 36  | 36 | 36  | 0.3455 | 0.6545 | 0.5    | 0.5    | 0.1545  | 0.2185 |
| Marker206599 | Chr7 | 569179   | 569447   | 42 | 28  | 22 | 20  | 0.6    | 0.4    | 0.5238 | 0.4762 | -0.0762 | 0.1078 |
| Marker202116 | Chr7 | 569469   | 569770   | 24 | 33  | 18 | 22  | 0.4211 | 0.5789 | 0.45   | 0.55   | 0.0289  | 0.0409 |
| Marker211321 | Chr7 | 569773   | 570098   | 61 | 71  | 45 | 84  | 0.4621 | 0.5379 | 0.3488 | 0.6512 | -0.1133 | 0.1602 |
| Marker211557 | Chr7 | 596420   | 596736   | 36 | 23  | 18 | 16  | 0.6102 | 0.3898 | 0.5294 | 0.4706 | -0.0808 | 0.1143 |
| Marker201126 | Chr7 | 642620   | 642983   | 11 | 10  | 5  | 4   | 0.5238 | 0.4762 | 0.5556 | 0.4444 | 0.0318  | 0.045  |
| Marker223485 | Chr7 | 645809   | 646113   | 38 | 57  | 32 | 44  | 0.4    | 0.6    | 0.4211 | 0.5789 | 0.0211  | 0.0298 |
| Marker228598 | Chr7 | 656597   | 656904   | 34 | 77  | 35 | 68  | 0.3063 | 0.6937 | 0.3398 | 0.6602 | 0.0335  | 0.0474 |
| Marker228251 | Chr7 | 663322   | 663578   | 6  | 16  | 4  | 11  | 0.2727 | 0.7273 | 0.2667 | 0.7333 | -0.006  | 0.0085 |
| Marker217992 | Chr7 | 882954   | 883276   | 16 | 28  | 5  | 14  | 0.3636 | 0.6364 | 0.6232 | 0.7368 | -0.1004 | 0.142  |
| Marker207866 | Chr7 | 904306   | 904627   | 27 | 29  | 12 | 25  | 0.4821 | 0.5179 | 0.3243 | 0.6757 | -0.1578 | 0.2232 |
| Marker204106 | Chr7 | 907872   | 908185   | 56 | 75  | 44 | 79  | 0.4275 | 0.5725 | 0.3577 | 0.6423 | -0.0698 | 0.0987 |
| Marker202104 | Chr7 | 908399   | 908690   | 37 | 47  | 28 | 45  | 0.4405 | 0.5595 | 0.3836 | 0.6164 | -0.0569 | 0.0805 |
| Marker202157 | Chr7 | 912029   | 912297   | 21 | 48  | 24 | 32  | 0.3043 | 0.6957 | 0.4286 | 0.5714 | 0.1243  | 0.1758 |
| Marker217783 | Chr7 | 931961   | 932325   | 27 | 26  | 10 | 23  | 0.5094 | 0.4906 | 0.303  | 0.697  | -0.2064 | 0.2919 |
| Marker202111 | Chr7 | 948321   | 948669   | 25 | 19  | 25 | 37  | 0.5682 | 0.4318 | 0.4032 | 0.5968 | -0.165  | 0.2333 |
| Marker220479 | Chr7 | 948672   | 948888   | 4  | 17  | 5  | 14  | 0.1905 | 0.8095 | 0.2632 | 0.7368 | 0.0727  | 0.1028 |
| Marker221391 | Chr7 | 957401   | 957716   | 11 | 18  | 14 | 18  | 0.3793 | 0.6207 | 0.4375 | 0.5625 | 0.0582  | 0.0823 |
| Marker210028 | Chr7 | 988613   | 988916   | 43 | 52  | 29 | 51  | 0.4526 | 0.5474 | 0.3625 | 0.6375 | -0.0901 | 0.1274 |
| Marker202757 | Chr7 | 991738   | 992056   | 22 | 21  | 21 | 8   | 0.5116 | 0.4884 | 0.7241 | 0.2759 | 0.2125  | 0.3005 |
| Marker209924 | Chr7 | 992068   | 992410   | 18 | 19  | 7  | 22  | 0.4865 | 0.5135 | 0.2414 | 0.7586 | -0.2451 | 0.3466 |
| Marker205973 | Chr7 | 992413   | 992658   | 9  | 8   | 9  | 4   | 0.5294 | 0.4706 | 0.6923 | 0.3077 | 0.1629  | 0.2304 |
| Marker228652 | Chr7 | 997048   | 997383   | 18 | 31  | 14 | 21  | 0.3673 | 0.6327 | 0.4    | 0.6    | 0.0327  | 0.0462 |
| Marker229019 | Chr7 | 1021197  | 1021548  | 58 | 44  | 29 | 26  | 0.5686 | 0.4314 | 0.5273 | 0.4727 | -0.0413 | 0.0584 |
| Marker217101 | Chr7 | 1155085  | 1155348  | 23 | 32  | 6  | 27  | 0.4182 | 0.5818 | 0.1818 | 0.8182 | -0.2364 | 0.3343 |
| Marker217682 | Chr7 | 1158915  | 1159174  | 7  | 6   | 7  | 6   | 0.5385 | 0.4615 | 0.5385 | 0.4615 | 0       | 0      |
| Marker207507 | Chr7 | 1225275  | 1225561  | 36 | 50  | 34 | 39  | 0.4186 | 0.5814 | 0.4658 | 0.5342 | 0.0472  | 0.0668 |
| Marker208760 | Chr7 | 1230044  | 1230335  | 33 | 35  | 30 | 23  | 0.4853 | 0.5147 | 0.566  | 0.434  | 0.0807  | 0.1141 |
| Marker223534 | Chr7 | 1253541  | 1253849  | 31 | 96  | 33 | 84  | 0.2441 | 0.7559 | 0.2821 | 0.7179 | 0.038   | 0.0537 |
| Marker224238 | Chr7 | 1278070  | 1278371  | 21 | 35  | 14 | 24  | 0.375  | 0.625  | 0.3684 | 0.6316 | -0.0066 | 0.0093 |
| Marker206483 | Chr7 | 1292876  | 1293160  | 22 | 35  | 12 | 33  | 0.386  | 0.614  | 0.2667 | 0.7333 | -0.1193 | 0.1687 |
| Marker218504 | Chr7 | 1295276  | 1295623  | 17 | 39  | 15 | 41  | 0.3036 | 0.6964 | 0.2679 | 0.7321 | -0.0357 | 0.0505 |
| Marker207387 | Chr7 | 1349573  | 1349906  | 11 | 9   | 7  | 13  | 0.55   | 0.45   | 0.35   | 0.65   | -0.2    | 0.2828 |
| Marker200953 | Chr7 | 1379297  | 1379597  | 50 | 83  | 50 | 54  | 0.3759 | 0.6241 | 0.4808 | 0.5192 | 0.1049  | 0.1484 |
| Marker208564 | Chr7 | 1404974  | 1405255  | 34 | 37  | 15 | 31  | 0.4789 | 0.5211 | 0.3261 | 0.6739 | -0.1528 | 0.2161 |
| Marker222034 | Chr7 | 1418012  | 1418304  | 21 | 27  | 19 | 17  | 0.4375 | 0.5625 | 0.5278 | 0.4722 | 0.0903  | 0.1277 |
| Marker227751 | Chr7 | 1438351  | 1438703  | 37 | 39  | 27 | 47  | 0.4868 | 0.5132 | 0.3649 | 0.6351 | -0.1219 | 0.1724 |
| Marker210983 | Chr7 | 1847151  | 1847426  | 17 | 45  | 39 | 56  | 0.2742 | 0.7258 | 0.4105 | 0.5895 | 0.1363  | 0.1928 |
| Marker199380 | Chr7 | 2054291  | 2054614  | 15 | 22  | 8  | 30  | 0.4054 | 0.5946 | 0.2105 | 0.7895 | -0.1949 | 0.2756 |
| Marker226503 | Chr7 | 2059616  | 2059934  | 19 | 26  | 19 | 13  | 0.4222 | 0.5778 | 0.5938 | 0.4062 | 0.1716  | 0.2427 |
| Marker223742 | Chr7 | 2080433  | 2080738  | 10 | 13  | 12 | 10  | 0.4348 | 0.5652 | 0.5455 | 0.4545 | 0.1107  | 0.1566 |
| Marker224077 | Chr7 | 2087407  | 2087694  | 31 | 15  | 16 | 20  | 0.6739 | 0.3261 | 0.4444 | 0.5556 | -0.2295 | 0.3246 |
| Marker210588 | Chr7 | 2379123  | 2379313  | 10 | 9   | 7  | 12  | 0.5263 | 0.4737 | 0.3684 | 0.6316 | -0.1579 | 0.2233 |
| Marker201093 | Chr7 | 2522551  | 2522864  | 27 | 13  | 11 | 13  | 0.675  | 0.325  | 0.4583 | 0.5417 | -0.2167 | 0.3065 |
| Marker206490 | Chr7 | 2525006  | 2525293  | 29 | 21  | 11 | 25  | 0.58   | 0.42   | 0.3056 | 0.6944 | -0.2744 | 0.3881 |
| Marker220820 | Chr7 | 2526542  | 2526873  | 13 | 10  | 2  | 14  | 0.5652 | 0.4348 | 0.125  | 0.875  | -0.4402 | 0.6225 |
| Marker219757 | Chr7 | 3039958  | 3040238  | 42 | 46  | 31 | 40  | 0.4773 | 0.5227 | 0.4366 | 0.5634 | -0.0407 | 0.0576 |
| Marker215043 | Chr7 | 3045309  | 3045584  | 13 | 9   | 14 | 16  | 0.5909 | 0.4091 | 0.4667 | 0.5333 | -0.1242 | 0.1756 |
| Marker229519 | Chr7 | 3199874  | 3200103  | 14 | 16  | 10 | 25  | 0.4667 | 0.5333 | 0.2857 | 0.7143 | -0.181  | 0.256  |
| Marker202002 | Chr7 | 3245638  | 3245916  | 53 | 47  | 22 | 49  | 0.53   | 0.47   | 0.3099 | 0.6901 | -0.2201 | 0.3113 |
| Marker224363 | Chr7 | 3263421  | 3263696  | 43 | 32  | 26 | 46  | 0.5733 | 0.4267 | 0.3611 | 0.6389 | -0.2122 | 0.3001 |
| Marker203995 | Chr7 | 3331714  | 3332058  | 17 | 24  | 8  | 24  | 0.4146 | 0.5854 | 0.25   | 0.75   | -0.1646 | 0.2328 |
| Marker201318 | Chr7 | 3346424  | 3346612  | 14 | 10  | 5  | 12  | 0.5833 | 0.4167 | 0.3941 | 0.7059 | -0.2892 | 0.409  |
| Marker200871 | Chr7 | 3349804  | 3350121  | 43 | 20  | 21 | 24  | 0.6825 | 0.3175 | 0.4667 | 0.5333 | -0.2158 | 0.3052 |
| Marker210218 | Chr7 | 3354251  | 3354502  | 18 | 10  | 11 | 11  | 0.6429 | 0.3571 | 0.5    | 0.5    | -0.1429 | 0.2021 |
| Marker204095 | Chr7 | 3361539  | 3361778  | 18 | 4   | 6  | 5   | 0.8182 | 0.1818 | 0.5455 | 0.4545 | -0.2727 | 0.3857 |
| Marker201261 | Chr7 | 3379453  | 3379695  | 4  | 2   | 4  | 6   | 0.6667 | 0.3333 | 0.4    | 0.6    | -0.2667 | 0.3772 |
| Marker208814 | Chr7 | 3397336  | 3397590  | 7  | 9   | 6  | 14  | 0.4375 | 0.5625 | 0.3    | 0.7    | -0.1375 | 0.1945 |
| Marker204727 | Chr7 | 3397593  | 3397902  | 57 | 24  | 42 | 47  | 0.7037 | 0.2963 | 0.4719 | 0.5281 | -0.2318 | 0.3278 |
| Marker228780 | Chr7 | 3404932  | 3405215  | 56 | 13  | 33 | 47  | 0.8116 | 0.1884 | 0.4125 | 0.5875 | -0.3991 | 0.5644 |
| Marker213919 | Chr7 | 3419261  | 3419573  | 30 | 24  | 12 | 25  | 0.5556 | 0.4444 | 0.3243 | 0.6757 | -0.2313 | 0.3271 |
| Marker228669 | Chr7 | 3629200  | 3629498  | 39 | 38  | 33 | 48  | 0.5065 | 0.4935 | 0.4074 | 0.5926 | -0.0991 | 0.1401 |
| Marker221081 | Chr7 | 3631416  | 3631755  | 37 | 20  | 18 | 23  | 0.6491 | 0.3509 | 0.439  | 0.561  | -0.2101 | 0.2971 |
| Marker219792 | Chr7 | 3637262  | 3637480  | 4  | 5   | 3  | 5   | 0.4444 | 0.5556 | 0.375  | 0.625  | -0.0694 | 0.0981 |
| Marker214024 | Chr7 | 3662501  | 3662764  | 17 | 11  | 9  | 11  | 0.6071 | 0.3929 | 0.45   | 0.55   | -0.1571 | 0.2222 |
| Marker209680 | Chr7 | 3662767  | 3663073  | 44 | 32  | 24 | 35  | 0.5789 | 0.4211 | 0.4068 | 0.5932 | -0.1721 | 0.2434 |
| Marker217571 | Chr7 | 3670708  | 3670972  | 20 | 21  | 5  | 21  | 0.4878 | 0.5122 | 0.1923 | 0.8077 | -0.2955 | 0.4179 |
| Marker227975 | Chr7 | 3670975  | 3671295  | 15 | 34  | 10 | 20  | 0.3061 | 0.6939 | 0.3333 | 0.6667 | 0.0272  | 0.0385 |
| Marker229900 | Chr7 | 3672608  | 3672867  | 11 | 9   | 12 | 18  | 0.55   | 0.45   | 0.4    | 0.6    | -0.15   | 0.2121 |
| Marker214171 | Chr7 | 3673474  | 3673779  | 95 | 115 | 63 | 120 | 0.4524 | 0.5476 | 0.3443 | 0.6557 | -0.1081 | 0.1529 |
| Marker219444 | Chr7 | 3675978  | 3676155  | 5  | 4   | 2  | 4   | 0.5556 | 0.4444 | 0.3333 | 0.6667 | -0.2223 | 0.3144 |
| Marker206885 | Chr7 | 3687349  | 3687633  | 60 | 61  | 38 | 70  | 0.4959 | 0.5041 | 0.3519 | 0.6481 | -0.144  | 0.2036 |

|              |      |          |          |    |    |    |    |        |        |        |        |         |        |
|--------------|------|----------|----------|----|----|----|----|--------|--------|--------|--------|---------|--------|
| Marker218480 | Chr7 | 3696020  | 3696321  | 23 | 28 | 8  | 25 | 0.451  | 0.549  | 0.2424 | 0.7576 | -0.2086 | 0.295  |
| Marker212627 | Chr7 | 3730912  | 3731175  | 32 | 22 | 19 | 25 | 0.5926 | 0.4074 | 0.4318 | 0.5682 | -0.1608 | 0.2274 |
| Marker213085 | Chr7 | 3738843  | 3739197  | 3  | 8  | 4  | 7  | 0.2727 | 0.7273 | 0.3636 | 0.6364 | 0.0909  | 0.1286 |
| Marker208311 | Chr7 | 3741729  | 3741999  | 39 | 23 | 20 | 24 | 0.629  | 0.371  | 0.4545 | 0.5455 | -0.1745 | 0.2468 |
| Marker221057 | Chr7 | 3864344  | 3864620  | 19 | 30 | 11 | 27 | 0.3878 | 0.6122 | 0.2895 | 0.7105 | -0.0983 | 0.139  |
| Marker229584 | Chr7 | 4014296  | 4014663  | 3  | 9  | 5  | 10 | 0.25   | 0.75   | 0.3333 | 0.6667 | 0.0833  | 0.1178 |
| Marker215171 | Chr7 | 4427882  | 4428133  | 23 | 7  | 7  | 8  | 0.7667 | 0.2333 | 0.4667 | 0.5333 | -0.3    | 0.4243 |
| Marker230002 | Chr7 | 4577368  | 4577608  | 13 | 10 | 9  | 7  | 0.5652 | 0.4348 | 0.5625 | 0.4375 | -0.0027 | 0.0038 |
| Marker205645 | Chr7 | 4634827  | 4635156  | 20 | 19 | 14 | 23 | 0.5128 | 0.4872 | 0.3784 | 0.6216 | -0.1344 | 0.1901 |
| Marker208793 | Chr7 | 4646260  | 4646545  | 59 | 34 | 26 | 45 | 0.6344 | 0.3656 | 0.3662 | 0.6338 | -0.2682 | 0.3793 |
| Marker224973 | Chr7 | 5267002  | 5267273  | 33 | 46 | 15 | 74 | 0.4177 | 0.5823 | 0.1685 | 0.8315 | -0.2492 | 0.3524 |
| Marker212586 | Chr7 | 6317119  | 6317431  | 35 | 26 | 23 | 28 | 0.5738 | 0.4262 | 0.451  | 0.549  | -0.1228 | 0.1737 |
| Marker207605 | Chr7 | 6387604  | 6387957  | 46 | 3  | 36 | 4  | 0.9388 | 0.0612 | 0.9    | 0.1    | -0.0388 | 0.0549 |
| Marker227232 | Chr7 | 6580315  | 6580601  | 33 | 34 | 27 | 14 | 0.4925 | 0.5075 | 0.6585 | 0.3415 | 0.166   | 0.2348 |
| Marker223364 | Chr7 | 6591106  | 6591429  | 19 | 18 | 11 | 8  | 0.5135 | 0.4865 | 0.5789 | 0.4211 | 0.0654  | 0.0925 |
| Marker212635 | Chr7 | 7648862  | 7649079  | 25 | 4  | 27 | 4  | 0.8621 | 0.1379 | 0.871  | 0.129  | 0.0089  | 0.0126 |
| Marker209070 | Chr7 | 7655010  | 7655219  | 9  | 4  | 12 | 5  | 0.6923 | 0.3077 | 0.7059 | 0.2941 | 0.0136  | 0.0192 |
| Marker202578 | Chr7 | 7824970  | 7825213  | 19 | 4  | 16 | 1  | 0.8261 | 0.1739 | 0.9412 | 0.0588 | 0.1151  | 0.1628 |
| Marker218798 | Chr7 | 8168815  | 8169089  | 41 | 58 | 26 | 50 | 0.4141 | 0.5859 | 0.3421 | 0.6579 | -0.072  | 0.1018 |
| Marker207365 | Chr7 | 9427822  | 9428162  | 16 | 10 | 10 | 14 | 0.6154 | 0.3846 | 0.4167 | 0.5833 | -0.1987 | 0.281  |
| Marker227150 | Chr7 | 9428983  | 9429318  | 44 | 10 | 19 | 30 | 0.8148 | 0.1852 | 0.3878 | 0.6122 | -0.427  | 0.6039 |
| Marker212372 | Chr7 | 9464028  | 9464324  | 6  | 12 | 5  | 7  | 0.3333 | 0.6667 | 0.4167 | 0.5833 | 0.0834  | 0.1179 |
| Marker223692 | Chr7 | 10309871 | 10310213 | 12 | 8  | 16 | 19 | 0.6    | 0.4    | 0.4571 | 0.5429 | -0.1429 | 0.2021 |
| Marker205545 | Chr7 | 10459577 | 10459867 | 73 | 66 | 67 | 83 | 0.5252 | 0.4748 | 0.4467 | 0.5533 | -0.0785 | 0.111  |
| Marker228047 | Chr7 | 10760760 | 10761035 | 27 | 44 | 26 | 39 | 0.3803 | 0.6197 | 0.4    | 0.6    | 0.0197  | 0.0279 |
| Marker211353 | Chr7 | 10770183 | 10770473 | 10 | 13 | 15 | 9  | 0.4348 | 0.5652 | 0.625  | 0.375  | 0.1902  | 0.269  |
| Marker226584 | Chr7 | 10774184 | 10774541 | 19 | 25 | 19 | 21 | 0.4318 | 0.5682 | 0.475  | 0.525  | 0.0432  | 0.0611 |
| Marker209607 | Chr7 | 10784151 | 10784483 | 26 | 17 | 16 | 9  | 0.6047 | 0.3953 | 0.64   | 0.36   | 0.0353  | 0.0499 |
| Marker217030 | Chr7 | 10787288 | 10787645 | 10 | 12 | 6  | 5  | 0.4545 | 0.5455 | 0.5455 | 0.4545 | 0.091   | 0.1287 |
| Marker216467 | Chr7 | 10790777 | 10791041 | 17 | 26 | 20 | 12 | 0.3953 | 0.6047 | 0.625  | 0.375  | 0.2297  | 0.3248 |
| Marker215633 | Chr7 | 10793871 | 10794226 | 23 | 15 | 19 | 8  | 0.6053 | 0.3947 | 0.7037 | 0.2963 | 0.0984  | 0.1392 |
| Marker227985 | Chr7 | 10835343 | 10835678 | 39 | 37 | 34 | 22 | 0.5132 | 0.4868 | 0.6071 | 0.3929 | 0.0939  | 0.1328 |
| Marker228038 | Chr7 | 10870752 | 10871063 | 74 | 35 | 54 | 53 | 0.6789 | 0.3211 | 0.5047 | 0.4953 | -0.1742 | 0.2464 |
| Marker218183 | Chr7 | 10871256 | 10871592 | 75 | 38 | 51 | 55 | 0.6637 | 0.3363 | 0.4811 | 0.5189 | -0.1826 | 0.2582 |
| Marker217797 | Chr7 | 10947703 | 10948028 | 42 | 42 | 26 | 33 | 0.5    | 0.5    | 0.4407 | 0.5593 | -0.0593 | 0.0839 |
| Marker215011 | Chr7 | 10989266 | 10989517 | 10 | 8  | 4  | 8  | 0.5556 | 0.4444 | 0.3333 | 0.6667 | -0.2223 | 0.3144 |
| Marker209836 | Chr7 | 11020384 | 11020714 | 12 | 2  | 9  | 8  | 0.8571 | 0.1429 | 0.5294 | 0.4706 | -0.3277 | 0.4634 |
| Marker224882 | Chr7 | 11366930 | 11367168 | 13 | 3  | 18 | 7  | 0.8125 | 0.1875 | 0.72   | 0.28   | -0.0925 | 0.1308 |
| Marker200358 | Chr7 | 11392951 | 11393252 | 38 | 20 | 16 | 29 | 0.6552 | 0.3448 | 0.3556 | 0.6444 | -0.2996 | 0.4237 |
| Marker225444 | Chr7 | 11834276 | 11834565 | 34 | 28 | 19 | 4  | 0.5484 | 0.4516 | 0.8261 | 0.1739 | 0.2777  | 0.3927 |
| Marker213494 | Chr7 | 12394024 | 12394362 | 44 | 47 | 22 | 45 | 0.4835 | 0.5165 | 0.3284 | 0.6716 | -0.1551 | 0.2193 |
| Marker228896 | Chr7 | 12398938 | 12399273 | 60 | 41 | 29 | 47 | 0.5941 | 0.4059 | 0.3816 | 0.6184 | -0.2125 | 0.3005 |
| Marker218189 | Chr7 | 12417001 | 12417331 | 28 | 42 | 26 | 13 | 0.4    | 0.6    | 0.6667 | 0.3333 | 0.2667  | 0.3772 |
| Marker220096 | Chr7 | 12426281 | 12426533 | 3  | 7  | 5  | 8  | 0.3    | 0.7    | 0.3846 | 0.6154 | 0.0846  | 0.1196 |
| Marker229275 | Chr7 | 12438466 | 12438722 | 15 | 15 | 17 | 26 | 0.5    | 0.5    | 0.3953 | 0.6047 | -0.1047 | 0.1481 |
| Marker204135 | Chr7 | 12449805 | 12450100 | 40 | 50 | 30 | 31 | 0.4444 | 0.5556 | 0.4918 | 0.5082 | 0.0474  | 0.067  |
| Marker213157 | Chr7 | 12476764 | 12477005 | 23 | 6  | 19 | 11 | 0.7931 | 0.2069 | 0.6333 | 0.3667 | -0.1598 | 0.226  |
| Marker206196 | Chr7 | 12477333 | 12477640 | 43 | 31 | 27 | 24 | 0.5811 | 0.4189 | 0.5294 | 0.4706 | -0.0517 | 0.0731 |
| Marker220189 | Chr7 | 12605447 | 12605700 | 29 | 0  | 18 | 3  | 1      | 0      | 0.8571 | 0.1429 | -0.1429 | 0.2021 |
| Marker222713 | Chr7 | 12631535 | 12631874 | 64 | 11 | 51 | 20 | 0.8533 | 0.1467 | 0.7183 | 0.2817 | -0.135  | 0.1909 |
| Marker214483 | Chr7 | 12776568 | 12776757 | 16 | 0  | 23 | 7  | 1      | 0      | 0.7667 | 0.2333 | -0.2333 | 0.3299 |
| Marker226619 | Chr7 | 12875139 | 12875421 | 68 | 2  | 37 | 21 | 0.9714 | 0.0286 | 0.6379 | 0.3621 | -0.3335 | 0.4716 |
| Marker205284 | Chr7 | 12965691 | 12966033 | 65 | 7  | 60 | 15 | 0.9028 | 0.0972 | 0.8    | 0.2    | -0.1028 | 0.1454 |
| Marker223639 | Chr7 | 13109540 | 13109850 | 43 | 32 | 23 | 39 | 0.5733 | 0.4267 | 0.371  | 0.629  | -0.2023 | 0.2861 |
| Marker207381 | Chr7 | 13113377 | 13113653 | 25 | 35 | 15 | 44 | 0.4167 | 0.5833 | 0.2542 | 0.7458 | -0.1625 | 0.2298 |
| Marker212786 | Chr7 | 13126123 | 13126416 | 52 | 35 | 18 | 25 | 0.5977 | 0.4023 | 0.4186 | 0.5814 | -0.1791 | 0.2533 |
| Marker220350 | Chr7 | 13228176 | 13228529 | 19 | 3  | 9  | 14 | 0.8636 | 0.1364 | 0.3913 | 0.6087 | -0.4723 | 0.6679 |
| Marker226204 | Chr7 | 13452939 | 13453158 | 13 | 2  | 12 | 5  | 0.8667 | 0.1333 | 0.7059 | 0.2941 | -0.1608 | 0.2274 |
| Marker225141 | Chr7 | 13456014 | 13456339 | 30 | 52 | 31 | 30 | 0.3659 | 0.6341 | 0.6041 | 0.4918 | 0.1423  | 0.2012 |
| Marker199767 | Chr7 | 13580930 | 13581218 | 31 | 10 | 26 | 11 | 0.7561 | 0.2439 | 0.7027 | 0.2973 | -0.0534 | 0.0755 |
| Marker223122 | Chr7 | 13586397 | 13586673 | 42 | 64 | 26 | 49 | 0.3962 | 0.6038 | 0.3467 | 0.6533 | -0.0495 | 0.07   |
| Marker217590 | Chr7 | 13608817 | 13609166 | 33 | 33 | 24 | 28 | 0.5    | 0.5    | 0.4615 | 0.5385 | -0.0385 | 0.0544 |
| Marker210600 | Chr7 | 13609266 | 13609537 | 51 | 65 | 55 | 68 | 0.4397 | 0.5603 | 0.4472 | 0.5528 | 0.0075  | 0.0106 |
| Marker211695 | Chr7 | 13610734 | 13611093 | 7  | 7  | 2  | 6  | 0.5    | 0.5    | 0.25   | 0.75   | -0.25   | 0.3536 |
| Marker221766 | Chr7 | 13619384 | 13619671 | 88 | 80 | 70 | 47 | 0.5238 | 0.4762 | 0.5983 | 0.4017 | 0.0745  | 0.1054 |
| Marker215558 | Chr7 | 13697219 | 13697574 | 22 | 34 | 24 | 33 | 0.3929 | 0.6071 | 0.4211 | 0.5789 | 0.0282  | 0.0399 |
| Marker201646 | Chr7 | 13718415 | 13718755 | 31 | 30 | 17 | 27 | 0.5082 | 0.4918 | 0.3864 | 0.6136 | -0.1218 | 0.1723 |
| Marker218266 | Chr7 | 13780407 | 13780597 | 2  | 3  | 4  | 4  | 0.4    | 0.6    | 0.5    | 0.5    | 0.1     | 0.1414 |
| Marker203788 | Chr7 | 14050573 | 14050848 | 36 | 39 | 55 | 29 | 0.48   | 0.52   | 0.6548 | 0.3452 | 0.1748  | 0.2472 |
| Marker205724 | Chr7 | 14052588 | 14052923 | 16 | 25 | 12 | 22 | 0.3902 | 0.6098 | 0.3529 | 0.6471 | -0.0373 | 0.0528 |
| Marker206812 | Chr7 | 14087728 | 14087992 | 17 | 5  | 11 | 8  | 0.7727 | 0.2273 | 0.5789 | 0.4211 | -0.1938 | 0.2741 |
| Marker206188 | Chr7 | 14108837 | 14109172 | 27 | 44 | 20 | 28 | 0.3803 | 0.6197 | 0.4167 | 0.5833 | 0.0364  | 0.0515 |
| Marker207554 | Chr7 | 14112699 | 14113053 | 26 | 26 | 11 | 17 | 0.5    | 0.5    | 0.3929 | 0.6071 | -0.1071 | 0.1515 |
| Marker203703 | Chr7 | 14125802 | 14126103 | 54 | 44 | 32 | 49 | 0.551  | 0.449  | 0.3951 | 0.6049 | -0.1559 | 0.2205 |
| Marker226265 | Chr7 | 14134841 | 14135063 | 19 | 4  | 9  | 3  | 0.8261 | 0.1739 | 0.75   | 0.25   | -0.0761 | 0.1076 |
| Marker220215 | Chr7 | 14138066 | 14138285 | 18 | 22 | 18 | 21 | 0.45   | 0.55   | 0.4615 | 0.5385 | 0.0115  | 0.0163 |
| Marker229894 | Chr7 | 14227453 | 14227781 | 36 | 29 | 25 | 22 | 0.5538 | 0.4462 | 0.5319 | 0.4681 | -0.0219 | 0.031  |
| Marker225271 | Chr7 | 14271472 | 14271808 | 28 | 35 | 30 | 34 | 0.4444 | 0.5556 | 0.4688 | 0.5312 | 0.0244  | 0.0345 |
| Marker225361 | Chr7 | 14273446 | 14273741 | 59 | 64 | 46 | 41 | 0.4797 | 0.5203 | 0.5203 | 0.4713 | 0.049   | 0.0693 |
| Marker229720 | Chr7 | 14630362 | 14630674 | 11 | 4  | 13 | 4  | 0.7333 | 0.2667 | 0.7647 | 0.2353 | 0.0314  | 0.0444 |
| Marker209272 | Chr7 | 14649693 | 14649972 | 21 | 25 | 25 | 5  | 0.4565 | 0.5435 | 0.8333 | 0.1667 | 0.3768  | 0.5329 |
| Marker216298 | Chr7 | 14906509 | 14906834 | 25 | 28 | 14 | 11 | 0.4717 | 0.5283 | 0.56   | 0.44   | 0.0883  | 0.1249 |

|              |      |          |          |     |     |     |     |        |        |        |        |         |        |
|--------------|------|----------|----------|-----|-----|-----|-----|--------|--------|--------|--------|---------|--------|
| Marker215742 | Chr7 | 15171038 | 15171365 | 58  | 43  | 41  | 33  | 0.5743 | 0.4257 | 0.5541 | 0.4459 | -0.0202 | 0.0286 |
| Marker226342 | Chr7 | 15171971 | 15172294 | 61  | 32  | 33  | 25  | 0.6559 | 0.3441 | 0.569  | 0.431  | -0.0869 | 0.1229 |
| Marker201631 | Chr7 | 15177675 | 15177978 | 68  | 38  | 54  | 41  | 0.6415 | 0.3585 | 0.5684 | 0.4316 | -0.0731 | 0.1034 |
| Marker209552 | Chr7 | 15182542 | 15182844 | 71  | 33  | 38  | 37  | 0.6827 | 0.3173 | 0.5067 | 0.4933 | -0.176  | 0.2489 |
| Marker213302 | Chr7 | 15311451 | 15311713 | 29  | 27  | 27  | 30  | 0.5179 | 0.4821 | 0.4737 | 0.5263 | -0.0442 | 0.0625 |
| Marker217545 | Chr7 | 15352944 | 15353251 | 32  | 25  | 11  | 17  | 0.5614 | 0.4386 | 0.3929 | 0.6071 | -0.1685 | 0.2383 |
| Marker206675 | Chr7 | 15379119 | 15379408 | 25  | 9   | 20  | 12  | 0.7353 | 0.2647 | 0.625  | 0.375  | -0.1103 | 0.156  |
| Marker205463 | Chr7 | 15422133 | 15422429 | 87  | 41  | 58  | 57  | 0.6797 | 0.3203 | 0.5043 | 0.4957 | -0.1754 | 0.2481 |
| Marker211669 | Chr7 | 15427100 | 15427318 | 18  | 7   | 5   | 9   | 0.72   | 0.28   | 0.3571 | 0.6429 | -0.3629 | 0.5132 |
| Marker205947 | Chr7 | 15431351 | 15431651 | 67  | 36  | 72  | 65  | 0.6505 | 0.3495 | 0.5255 | 0.4745 | -0.125  | 0.1768 |
| Marker222310 | Chr7 | 15474229 | 15474504 | 34  | 39  | 36  | 31  | 0.4658 | 0.5342 | 0.5373 | 0.4627 | 0.0715  | 0.1011 |
| Marker228533 | Chr7 | 15495460 | 15495723 | 11  | 7   | 9   | 2   | 0.6111 | 0.3889 | 0.8182 | 0.1818 | 0.2071  | 0.2929 |
| Marker218628 | Chr7 | 15507860 | 15508169 | 17  | 22  | 19  | 8   | 0.4359 | 0.5641 | 0.7037 | 0.2963 | 0.2678  | 0.3787 |
| Marker227680 | Chr7 | 15514079 | 15514351 | 49  | 28  | 25  | 25  | 0.6364 | 0.3636 | 0.5    | 0.5    | -0.1364 | 0.1929 |
| Marker226539 | Chr7 | 15517090 | 15517424 | 57  | 61  | 72  | 74  | 0.4831 | 0.5169 | 0.4932 | 0.5068 | 0.0101  | 0.0143 |
| Marker217244 | Chr7 | 15528163 | 15528430 | 25  | 16  | 17  | 17  | 0.6098 | 0.3902 | 0.5    | 0.5    | -0.1098 | 0.1553 |
| Marker225576 | Chr7 | 15544730 | 15545064 | 33  | 21  | 58  | 32  | 0.6111 | 0.3889 | 0.6444 | 0.3556 | 0.0333  | 0.0471 |
| Marker215900 | Chr7 | 15545616 | 15545941 | 23  | 24  | 12  | 12  | 0.4894 | 0.5106 | 0.5    | 0.5    | 0.0106  | 0.015  |
| Marker209701 | Chr7 | 15601617 | 15601936 | 54  | 38  | 46  | 23  | 0.587  | 0.413  | 0.6667 | 0.3333 | 0.0797  | 0.1127 |
| Marker209233 | Chr7 | 15625129 | 15625449 | 61  | 30  | 39  | 28  | 0.6703 | 0.3297 | 0.5821 | 0.4179 | -0.0882 | 0.1247 |
| Marker222440 | Chr7 | 15641798 | 15642069 | 23  | 28  | 22  | 17  | 0.451  | 0.549  | 0.5641 | 0.4359 | 0.1131  | 0.1599 |
| Marker227903 | Chr7 | 15644644 | 15644993 | 61  | 41  | 34  | 44  | 0.598  | 0.402  | 0.4359 | 0.5641 | -0.1621 | 0.2292 |
| Marker226198 | Chr7 | 15679903 | 15680245 | 40  | 29  | 35  | 15  | 0.5797 | 0.4203 | 0.7    | 0.3    | 0.1203  | 0.1701 |
| Marker205980 | Chr7 | 15732191 | 15732515 | 36  | 18  | 29  | 24  | 0.6667 | 0.3333 | 0.5472 | 0.4528 | -0.1195 | 0.169  |
| Marker225616 | Chr7 | 15733590 | 15733868 | 39  | 56  | 29  | 42  | 0.4105 | 0.5895 | 0.4085 | 0.5915 | -0.002  | 0.0028 |
| Marker208900 | Chr7 | 15901273 | 15901632 | 25  | 16  | 23  | 14  | 0.6098 | 0.3902 | 0.6216 | 0.3784 | 0.0118  | 0.0167 |
| Marker201072 | Chr7 | 15936701 | 15937057 | 14  | 9   | 10  | 7   | 0.6087 | 0.3913 | 0.5882 | 0.4118 | -0.0205 | 0.029  |
| Marker217209 | Chr7 | 15941107 | 15941448 | 8   | 19  | 10  | 13  | 0.2963 | 0.7037 | 0.4348 | 0.5652 | 0.1385  | 0.1959 |
| Marker212966 | Chr7 | 15947280 | 15947593 | 18  | 20  | 31  | 21  | 0.4737 | 0.5263 | 0.5962 | 0.4038 | 0.1225  | 0.1732 |
| Marker209533 | Chr7 | 15948790 | 15949066 | 52  | 31  | 36  | 26  | 0.6265 | 0.3735 | 0.5806 | 0.4194 | -0.0459 | 0.0649 |
| Marker221751 | Chr7 | 15964655 | 15964957 | 43  | 31  | 29  | 27  | 0.5811 | 0.4189 | 0.5179 | 0.4821 | -0.0632 | 0.0894 |
| Marker200546 | Chr7 | 15965184 | 15965451 | 27  | 20  | 30  | 23  | 0.5745 | 0.4255 | 0.566  | 0.434  | -0.0085 | 0.012  |
| Marker212127 | Chr7 | 15996767 | 15997026 | 7   | 5   | 4   | 3   | 0.5833 | 0.4167 | 0.5714 | 0.4286 | -0.0119 | 0.0168 |
| Marker202206 | Chr7 | 16218110 | 16218384 | 76  | 66  | 57  | 39  | 0.5352 | 0.4648 | 0.5938 | 0.4062 | 0.0586  | 0.0829 |
| Marker211702 | Chr7 | 16300378 | 16300684 | 19  | 4   | 15  | 1   | 0.8261 | 0.1739 | 0.9375 | 0.0625 | 0.1114  | 0.1575 |
| Marker223909 | Chr7 | 16337761 | 16338027 | 8   | 5   | 6   | 11  | 0.6154 | 0.3846 | 0.3529 | 0.6471 | -0.2625 | 0.3712 |
| Marker206051 | Chr7 | 16376715 | 16377031 | 18  | 10  | 6   | 11  | 0.6429 | 0.3571 | 0.3529 | 0.6471 | -0.29   | 0.4101 |
| Marker222796 | Chr7 | 16397267 | 16397586 | 30  | 34  | 11  | 13  | 0.4688 | 0.5312 | 0.4583 | 0.5417 | -0.0105 | 0.0148 |
| Marker206270 | Chr7 | 16403780 | 16404094 | 49  | 33  | 49  | 29  | 0.5976 | 0.4024 | 0.6282 | 0.3718 | 0.0306  | 0.0433 |
| Marker218421 | Chr7 | 16577651 | 16577961 | 40  | 7   | 46  | 20  | 0.8511 | 0.1489 | 0.697  | 0.303  | -0.1541 | 0.2179 |
| Marker211881 | Chr7 | 16657433 | 16657714 | 14  | 2   | 8   | 3   | 0.875  | 0.125  | 0.7273 | 0.2727 | -0.1477 | 0.2089 |
| Marker228835 | Chr7 | 16716988 | 16717305 | 22  | 5   | 31  | 9   | 0.8148 | 0.1852 | 0.775  | 0.225  | -0.0398 | 0.0563 |
| Marker201874 | Chr7 | 17513912 | 17514242 | 18  | 30  | 22  | 21  | 0.375  | 0.625  | 0.5116 | 0.4884 | 0.1366  | 0.1932 |
| Marker212012 | Chr7 | 17514245 | 17514535 | 28  | 33  | 20  | 28  | 0.459  | 0.541  | 0.4167 | 0.5833 | -0.0423 | 0.0598 |
| Marker209089 | Chr7 | 17536219 | 17536522 | 48  | 23  | 39  | 23  | 0.6761 | 0.3239 | 0.629  | 0.371  | -0.0471 | 0.0666 |
| Marker218085 | Chr7 | 17536591 | 17536864 | 139 | 119 | 144 | 107 | 0.5388 | 0.4612 | 0.5737 | 0.4263 | 0.0349  | 0.0494 |
| Marker227630 | Chr7 | 17684478 | 17684831 | 28  | 20  | 18  | 20  | 0.5833 | 0.4167 | 0.4737 | 0.5263 | -0.1096 | 0.155  |
| Marker209291 | Chr7 | 17700216 | 17700477 | 16  | 8   | 25  | 14  | 0.6667 | 0.3333 | 0.641  | 0.359  | -0.0257 | 0.0363 |

Start: start position on 9930 V2 genome assembly;

End: end position on 9930 V2 genome assembly;

M stands for D8; Pstands for XUE1;

aa denotes the genotype from D8 in the thick flesh pool; ab denotes the genotype from the thin pool;

Supplementary Table 2 Predicated genes functions of the 0.19Mb region delimited by markers Marker99123 and Marker79965 on chromosome 2 of 9930 reference genome assembly V2.

| #  | Gene name            | Predicted gene function                                                              | Start position | End position | Length | E-Value   |
|----|----------------------|--------------------------------------------------------------------------------------|----------------|--------------|--------|-----------|
| 1  | <i>Csa2M058670.1</i> | SET domain protein-lysine methyltransferase                                          | 4404675        | 4413152      | 8478   | 2.00E-145 |
| 2  | <i>Csa2M058680.1</i> | No hits found                                                                        | 4415108        | 4415397      | 290    |           |
| 3  | <i>Csa2M058690.1</i> | PREDICTED: hypothetical protein [ <i>Vitis vinifera</i> ]                            | 4416897        | 4421636      | 4740   | 8.00E-82  |
| 4  | <i>Csa2M058700.1</i> | DNA repair protein XRCC3-like protein [ <i>Arabidopsis thaliana</i> ]                | 4423412        | 4424373      | 962    | 1.00E-97  |
| 5  | <i>Csa2M059200.1</i> | auxin-responsive protein IAA33 [ <i>Arabidopsis thaliana</i> ]                       | 4434876        | 4436988      | 2113   | 2.00E-35  |
| 6  | <i>Csa2M059700.1</i> | MRGH63 [ <i>Cucumis melo subsp. melo</i> ]                                           | 4444505        | 4448781      | 4277   | 0         |
| 7  | <i>Csa2M059710.1</i> | No hits found                                                                        | 4452802        | 4453069      | 268    |           |
| 8  | <i>Csa2M059720.1</i> | NADPH:cytochrome P450 reductase [ <i>Gossypium hirsutum</i> ]                        | 4458138        | 4466336      | 8199   | 0         |
| 9  | <i>Csa2M059730.1</i> | Afadin- and alpha-actinin-binding protein, putative [ <i>Ricinus communis</i> ]      | 4479860        | 4485825      | 5966   | 4.00E-174 |
| 10 | <i>Csa2M059740.1</i> | predicted protein [ <i>Populus trichocarpa</i> ]                                     | 4490667        | 4491304      | 638    | 1.00E-22  |
| 11 | <i>Csa2M059750.1</i> | 40S ribosomal protein S8, putative [ <i>Ricinus communis</i> ]                       | 4494985        | 4497446      | 2462   | 7.00E-112 |
| 12 | <i>Csa2M059760.1</i> | PREDICTED: hypothetical protein [ <i>Vitis vinifera</i> ]                            | 4504318        | 4508495      | 4178   | 2.00E-240 |
| 13 | <i>Csa2M059770.1</i> | clock-associated PAS protein ZEITLUPE 2 [ <i>Glycine max</i> ]                       | 4510112        | 4524211      | 14100  | 0         |
| 14 | <i>Csa2M059780.1</i> | Ycf2 [ <i>Cucumis sativus</i> ]                                                      | 4528172        | 4529518      | 1347   | 3.00E-256 |
| 15 | <i>Csa2M059790.1</i> | 1-acyl-sn-glycerol-3-phosphate acyltransferase, putative [ <i>Ricinus communis</i> ] | 4547162        | 4549738      | 2577   | 2.00E-111 |
| 16 | <i>Csa2M059800.1</i> | PREDICTED: hypothetical protein [ <i>Vitis vinifera</i> ]                            | 4557639        | 4560783      | 3145   | 1.00E-217 |
| 17 | <i>Csa2M059810.1</i> | No hits found                                                                        | 4563918        | 4564563      | 646    |           |
| 18 | <i>Csa2M059820.1</i> | Tetratricopeptide-like helical [ <i>Medicago truncatula</i> ]                        | 4572915        | 4575799      | 2885   | 0         |
| 19 | <i>Csa2M059830.1</i> | homogentisate phytyltransferase [ <i>Manihot esculenta</i> ]                         | 4584090        | 4600474      | 16385  | 9.00E-153 |
| 20 | <i>Csa2M059840.1</i> | lysyl-tRNA synthetase, putative [ <i>Ricinus communis</i> ]                          | 4603076        | 4610475      | 7400   | 1.00E-292 |

Supplementary Table 3 Pearson correlation coefficient (PCC value) between relative expressions of the 20 predicted genes based on the qRT-PCR and relative increasing of the average fruit flesh thickness in D8 and XUE1.

|                      | D8           | XUE1         |
|----------------------|--------------|--------------|
| <i>Csa2M058670.1</i> | 0.896430192  | 0.862702307  |
| <i>Csa2M058680.1</i> | -0.366682476 | -0.213308355 |
| <i>Csa2M058690.1</i> | -0.284432826 | -0.417953778 |
| <i>Csa2M058700.1</i> | 0.094716268  | -0.495301213 |
| <i>Csa2M059200.1</i> | -0.601715842 | -0.211840769 |
| <i>Csa2M059700.1</i> | -0.669372604 | -0.354671328 |
| <i>Csa2M059710.1</i> | 0.119948046  | -0.555888178 |
| <i>Csa2M059720.1</i> | 0.119948046  | 0.019440933  |
| <i>Csa2M059730.1</i> | 0.638217945  | 0.577186404  |
| <i>Csa2M059740.1</i> | -0.545508718 | -0.484889356 |
| <i>Csa2M059750.1</i> | -0.660002718 | -0.57355085  |
| <i>Csa2M059760.1</i> | -0.448450331 | 0.830217919  |
| <i>Csa2M059770.1</i> | -0.211392842 | -0.605091875 |
| <i>Csa2M059780.1</i> | -0.262545499 | -0.389656013 |
| <i>Csa2M059790.1</i> | 0.773032252  | 0.2908298    |
| <i>Csa2M059800.1</i> | -0.120895478 | -0.192782597 |
| <i>Csa2M059810.1</i> | -0.882353362 | -0.390108206 |
| <i>Csa2M059820.1</i> | -0.559955935 | -0.496504327 |
| <i>Csa2M059830.1</i> | -0.15863753  | -0.032945753 |
| <i>Csa2M059840.1</i> | 0.665731507  | 0.237927424  |

The red background denoted the significant positive correlation; The green background denoted the significant negative correlation; Correlation is significant at the 0.05 level (2-tailed).

Supplementary Table 4 Information of the 23 SNP-derived dCAPS markers developed for PCR genotyping validation.

| #  | dCAPS marker | Corresponding SLAF marker | SNP type | Primer(5'to3')                                             | Enzyme   | Recognition Sequence |
|----|--------------|---------------------------|----------|------------------------------------------------------------|----------|----------------------|
| 1  | dCAPS-01     | Marker99123               | G/A      | -F- GTAATAAATCACTATACTCGTA<br>-R- TGCAAAAGACAAAACATTCAAGAT | DpnI     | GATC                 |
| 2  | dCAPS-02     | Marker96342               | C/A      | -F- ACGAGTCTTGTTTATTAGTGAAGAT<br>-R- CAATGGCTGCAATAAATAG   | DpnI     | GATC                 |
| 3  | dCAPS-03     | Marker94108               | A/G      | -F- AAACGGTCTGACCACAAA<br>-R- ATTTGAAAGATGTCACCTACCCAGG    | HaeIII   | GGCC                 |
| 4  | dCAPS-04     | Marker84496               | T/C      | -F- TCATCCCTTCACCTTCCCAACAGC<br>-R- GAAGCTATTGGCTAAGAAGTA  | AluI     | AGCT                 |
| 5  | dCAPS-05     | Marker67362               | A/G      | -F- ACCTGCATATTAATGATCTTTTCT<br>-R- ACCTCGGTGGGAGATGAA     | XbaI     | TCTAGA               |
| 6  | dCAPS-06     | Marker78298               | A/G      | -F- ATGGCATTGGCATAATGCCATGAC<br>-R- TTACCCTGCGTATTCAT      | MaeII    | ACGT                 |
| 7  | dCAPS-07     | Marker71789               | T/C      | -F- AAGTGACCCGTGAAGTAA<br>-R- TTAACTTATAAACCAAACTCCCG      | HpaII    | CCGG                 |
| 8  | dCAPS-08     | Marker99842               | G/A      | -F- GGAAATGGAAGGGAAATT<br>-R- TCATCCGAGGTAGGGGTCGAGATTC    | HpaII    | CCGG                 |
| 9  | dCAPS-09     | Marker77111               | A/G      | -F- CTTCTAACTTAAAGATGAGAGAATC<br>-R- TAAGCCAACCCATCAAA     | TaqI     | TCGA                 |
| 10 | dCAPS-10     | Marker77215               | A/G      | -F- TGTCATTAGAGTTGGTTGAATGGC<br>-R- CAAACGACCACTGCTGAA     | BbvI     | GCAGC                |
| 11 | dCAPS-11     | Marker99687               | G/A      | -F- GCCTTCTGTTCTGTTGT<br>-R- ATCAACAATCTGATAAAGCACTGTA     | Bsp1407I | TGTACA               |
| 12 | dCAPS-12     | Marker75262               | T/C      | -F- TTATCATCATTGGTCGGC<br>-R- TCAACAATAGCAAGTGTGTGAAATT    | MseI     | TTAA                 |
| 13 | dCAPS-13     | Marker99921               | A/G      | -F- TCTTTCTCTACCTTTTTCCTAAC<br>-R- ACAAATCTAGCAGACGTT      | MaeII    | ACGT                 |
| 14 | dCAPS-14     | Marker84162               | A/T      | -F- TTCTCAAAGTTTATCAATAACTT<br>-R- CACTCTGCTTATCTTATT      | MseI     | TTAA                 |
| 15 | dCAPS-15     | Marker79589               | A/G      | -F- ACATTAGGTTTACCTGGATAATTCG<br>-R- CATAAGCTGGTTGAGTAAAT  | TaqI     | TCGA                 |
| 16 | dCAPS-16     | Marker83947               | G/A      | -F- AGAACTCTTCTGTGTGCGGGTATC<br>-R- TTCTTCCCATCAGTCAA      | TaqI     | TCGA                 |
| 17 | dCAPS-17     | Marker70483               | A/T      | -F- CTCATTATCCTGGAAGGG<br>-R- TGAGTCCAGTTGTGAGATTAAGTCG    | TaqI     | TCGA                 |
| 18 | dCAPS-18     | Mrker83778                | G/T      | -F- TGTTGGAGTAAGATAACACCAAGC<br>-R- CAGGGTATTGTTGGGTTT     | AluI     | AGCT                 |
| 19 | dCAPS-19     | Marker73498               | C/A      | -F- TTAGTCCCTAAACCTTACTGCATTA<br>-R- TAGTCCCTGAACTTCAA     | MseI     | TTAA                 |
| 20 | dCAPS-20     | Marker100379              | T/A      | -F- TGAAATGATATGACCCATATAATCG<br>-R- TGAATAATGCTCCATCCA    | TaqI     | TCGA                 |
| 21 | dCAPS-21     | Marker80096               | A/G      | -F- GCTCCAAAAGAAAAGTTTGACCTC<br>-R- CAGCCCTAAATAATCCAA     | TaqI     | TCGA                 |

|    |          |             |     |     |                           |      |      |
|----|----------|-------------|-----|-----|---------------------------|------|------|
| 22 | dCAPS-22 | Marker77113 | A/G | -F- | ATAATCATCCTAAAATGGGAAATTA | MseI | TTAA |
|    |          |             |     | -R- | ATGCAGTTGCAAAGATCA        |      |      |
| 23 | dCAPS-23 | Marker79965 | G/T | -F- | GAAATGGATCCCACGGTATGGCTTC | TaqI | TCGA |
|    |          |             |     | -R- | TGTTACCATCTGCCTTCT        |      |      |

Supplementary Table 5 PCR primers for qRT-PCR analysis.

| #  | Gene Name     | Sequence (5' to 3') |                      |
|----|---------------|---------------------|----------------------|
| 1  | Csa2M058670.1 | -F-                 | TAGTTATGGGAATTACTCTG |
|    |               | -R-                 | TTATCATCATCACCGAAG   |
| 2  | Csa2M058680.1 | -F-                 | CGTTTCTACAACCAATCA   |
|    |               | -R-                 | ACGACCGACACTCCATCA   |
| 3  | Csa2M058690.1 | -F-                 | TCGGAAGTACCACAAAGT   |
|    |               | -R-                 | GGATTCATATCTGCCACTA  |
| 4  | Csa2M058700.1 | -F-                 | CATAATGCCCAAGATAGAAT |
|    |               | -R-                 | AATCAGAGCGAAAACAAGG  |
| 5  | Csa2M059200.1 | -F-                 | TGAGTCCACCGCAACAGG   |
|    |               | -R-                 | CGTCGTCCACGAACATCC   |
| 6  | Csa2M059700.1 | -F-                 | GAAGCCTGTGGTTGTTTA   |
|    |               | -R-                 | CGACCCATTTGTTGTATT   |
| 7  | Csa2M059710.1 | -F-                 | TTTTCCCGATGCCTGTTT   |
|    |               | -R-                 | GACCCATCCCAACGAAC    |
| 8  | Csa2M059720.1 | -F-                 | GCCTCCACTTGGTGTCTT   |
|    |               | -R-                 | CTCCTCCAGTGAAATAGCAT |
| 9  | Csa2M059730.1 | -F-                 | TGCTCCTAATGGACTACCT  |
|    |               | -R-                 | TCTTATCCGAAGGCTCT    |
| 10 | Csa2M059740.1 | -F-                 | TTGGGATATGAAGAACAAAG |
|    |               | -R-                 | CAAATCTTGAGGAGGAGG   |
| 11 | Csa2M059750.1 | -F-                 | GGCACTGAGGAGGTAAAG   |
|    |               | -R-                 | TACAAGCCATCAAACGAC   |
| 12 | Csa2M059760.1 | -F-                 | ACCAACTGTAGCGACCTT   |
|    |               | -R-                 | AGTATTTTCGATGCCCTTT  |
| 13 | Csa2M059770.1 | -F-                 | AAACCAGAGTGGCAGCAT   |
|    |               | -R-                 | CCACAACCTCCAAAGACC   |
| 14 | Csa2M059780.1 | -F-                 | TCCCAGGTAAGATCAGTT   |
|    |               | -R-                 | ATGCTCGTTTCAAGTTCG   |
| 15 | Csa2M059790.1 | -F-                 | TATGCTTATGCTGGTGGC   |
|    |               | -R-                 | GCAGGAGAATTGGGAGAT   |
| 16 | Csa2M059800.1 | -F-                 | ATGGATGAAGCCGATAAAA  |
|    |               | -R-                 | CAGTGGCGATGTTTGAAGA  |



|    |               |     |                       |
|----|---------------|-----|-----------------------|
| 17 | Csa2M059810.1 | -F- | ACAAC TAACA AATTCCTAG |
|    |               | -R- | AACTGAGATTATCCGTGA    |
| 18 | Csa2M059820.1 | -F- | AAATTCCCATTGACAAGTAC  |
|    |               | -R- | TTATCCCAAGAGCGACCC    |
| 19 | Csa2M059830.1 | -F- | TTTTGGCTAGGATGGGTT    |
|    |               | -R- | ACATAGCGCAACGACAG     |
| 20 | Csa2M059840.1 | -F- | ACCACCTGCGAGTTCTAC    |
|    |               | -R- | ATCGTTATCAAGCCCATT    |
| 21 | Actin         | -F- | TCGTGCTGGATTCTGGTG    |
|    |               | -R- | GGCAGTGGTGGTGAACAT    |

---
